# Supplementary material for: Elucidating the transcriptomic response of adult-derived mHypoA-2/12 mouse hypothalamic neuron cell line to cannabidiol (CBD) exposure
Source: J Appl Genet. 2025 May 8;66(4):1029–51. doi: 10.1007/s13353-025-00970-8 (PMC12605594; doi:10.1007/s13353-025-00970-8)
Supplement: Supplementary file 1 — Supplementary file1 Primers used for qPCR RNA-Seq validation and obtained correlation coefficients (XLSX 10 KB) [file 13353_2025_970_MOESM1_ESM.xlsx]

## Sheet: Primers
Gene	F (5'-3')	R (5'-3')
Mmp13	TGATGAAACCTGGACAAGCA	TCCTTGGAGTGATCCAGACC
Naca	GCAGCAGAGATCGATGAAGA	CGAAGACCCAGTTTGGACAT
Mark1	GCATTGTTCACCGTGATCTT	CCCACTGTGAATTCATTGCTA
Ifitm2	TGGTCTGGTCCCTGTTCAAT	CCACCATCTTCCTGTCCCTA
Gm8960	TTCTCCTGGGATATGGCAGC	CTTCTTCTGGCTGGGAGGAG
Endogenous control
HPRT	GCGATGATGAACCAGGTTATGA	GCCTCCCATCTCCTTCATGA

## Sheet: Results
Correlation Table
Separate genes		Spearman
	Gene	rho		p-value
Mmp13_q	Mmp13_r	0.7		0.233
Naca_q	Naca_r	0.6		0.35
Ifitm2_q	Ifitm2_r	0.9		0.083
Gm8960_q	Gm8960_r	0.3		0.683
Mean		0.625
* p < .05, ** p < .01, *** p < .001
All genes		Spearman
		rho		p
qPCR vs RNA-Seq		0.538	*	0.016
* p < .05, ** p < .01, *** p < .001
