# Supplementary material for: Elucidating the transcriptomic response of adult-derived mHypoA-2/12 mouse hypothalamic neuron cell line to cannabidiol (CBD) exposure
Source: J Appl Genet. 2025 May 8;66(4):1029–51. doi: 10.1007/s13353-025-00970-8 (PMC12605594; doi:10.1007/s13353-025-00970-8)
Supplement: Supplementary file 2 — Supplementary file2 Sequencing reads and mapping statistics (XLSX 15 KB) [file 13353_2025_970_MOESM2_ESM.xlsx]

## Sheet: star_alignment_plot(2)
Category	Raw reads	Filtered reads	Filtered reads %	Uniquely mapped	Uniquely mapped %	Maped in genes	Maped in genes %
A1	5.4556e+06	5390906	98.8142	2492728	46.2395	1839621	73.7995
A10	7.76355e+06	7611327	98.0392	3630356	47.6968	2715507	74.8
A11	7.26461e+06	7171385	98.7167	3640223	50.7604	2696044	74.0626
A12	8.57477e+06	8473090	98.8142	4320708	50.9933	3274523	75.7867
A13	7.77716e+06	7681144	98.7654	3370008	43.8738	2604452	77.2833
A14	7.74915e+06	7658780	98.8338	3606278	47.0868	2693650	74.6934
A15	6.01965e+06	5953566	98.9022	3075339	51.6554	2312145	75.1834
A16	7.49908e+06	7421890	98.9707	3384160	45.597	2518615	74.4236
A17	5.30421e+06	5253251	99.0393	3220834	61.3113	2365990	73.4589
A18	5.62989e+06	5579668	99.108	3130786	56.1106	2304492	73.6075
A19	4.62971e+06	4591597	99.1768	2934688	63.9143	2192094	74.696
A2	5.91546e+06	5870838	99.2457	2583712	44.0093	1919498	74.2923
A20	5.48277e+06	5445199	99.3147	3235800	59.4248	2448694	75.6751
A21	7.69635e+06	7648928	99.3838	4833594	63.1931	3640723	75.3212
A22	6.01378e+06	5980888	99.453	3654176	61.0975	2750965	75.2828
A23	5.13053e+06	5106017	99.5223	3177701	62.2344	2392063	75.2765
A24	5.6955e+06	5672245	99.5917	3516213	61.9898	2678998	76.1899
A25	8.76429e+06	8734589	99.6612	5824475	66.6829	4420675	75.8983
A26	8.13184e+06	8109948	99.7307	5206253	64.1959	3927377	75.4358
A27	7.85326e+06	7760135	98.8142	4639591	59.7875	3506651	75.581
A28	9.06977e+06	8891935	98.0392	5607509	63.0629	4162843	74.2369
A29	7.42502e+06	7329734	98.7167	4074635	55.5905	3020841	74.1377
A3	9.66957e+06	9554908	98.8142	4638313	48.5438	3574833	77.0718
A30	6.67823e+06	6595781	98.7654	4029667	61.0946	2942410	73.0187
A4	9.0734e+06	8965811	98.8142	4279771	47.7343	3239116	75.6843
A5	6.57502e+06	6446101	98.0392	3027251	46.9625	2287249	75.5553
A6	6.76352e+06	6676718	98.7167	3126166	46.8219	2363117	75.5915
A7	7.09744e+06	7013282	98.8142	3341676	47.6478	2542865	76.0955
A8	7.22987e+06	7140613	98.7654	3326674	46.5881	2507629	75.3795
A9	6.43275e+06	6272182	97.5039	3266734	52.0829	2429400	74.3679
All (mean)	7.01219e+06	6.93342e+06	98.8962	3.73987e+06	54.1328	2.8091e+06	75.0629
All (sum)	2.10366e+08	208002456		112196019		84273080
