# Supplementary material for: Elucidating the transcriptomic response of adult-derived mHypoA-2/12 mouse hypothalamic neuron cell line to cannabidiol (CBD) exposure
Source: J Appl Genet. 2025 May 8;66(4):1029–51. doi: 10.1007/s13353-025-00970-8 (PMC12605594; doi:10.1007/s13353-025-00970-8)
Supplement: Supplementary file 3 — Supplementary file3 Differential expression analysis for cells treated with different concentrations of CBD for 6 and 24 h (including genes regulation tables) (XLSX 17489 KB) [file 13353_2025_970_MOESM3_ESM.xlsx]

## Sheet: 6h
symbol	ensembl_ID	User_ID	CTR6h_A-X6hCBD0325_A_log2FC	CTR6h_A-X6hCBD0325_A_adjPval	CTR6h_A-X6hCBD075_A_log2FC	CTR6h_A-X6hCBD075_A_adjPval	CTR6h_A-X6hCBD15_A_log2FC	CTR6h_A-X6hCBD15_A_adjPval	CTR6h_A-X6hCBD3_A_log2FC	CTR6h_A-X6hCBD3_A_adjPval	Processed data:	CTR6h_A1	CTR6h_A2	CTR6h_A3	X6hCBD3_A4	X6hCBD3_A5	X6hCBD3_A6	X6hCBD15_A7	X6hCBD15_A8	X6hCBD15_A9	X6hCBD075_A10	X6hCBD075_A11	X6hCBD075_A12	X6hCBD0325_A13	X6hCBD0325_A14	X6hCBD0325_A15
mt-Nd4	ENSMUSG00000064363	ENSMUSG00000064363	-0.00420716	0.998429	-0.15557	0.995681	0.100989	0.956453	0.147671	0.986276		15.7459	15.6613	15.4157	15.3688	15.4342	15.5881	15.2415	15.6938	15.5677	15.4686	15.4673	16.2319	15.5998	15.8249	15.3994
mt-Rnr2	ENSMUSG00000064339	ENSMUSG00000064339	-0.0225819	0.991488	0.0525469	0.995681	0.00634105	0.996156	0.0720124	0.990293		15.5621	15.587	15.8518	15.5172	15.5449	15.7317	15.6458	15.5848	15.764	15.6684	15.6695	15.5187	15.8368	15.3486	15.8478
Actb	ENSMUSG00000029580	ENSMUSG00000029580	-0.196104	0.714422	0.0228593	0.995681	-0.287928	0.339195	-0.0579149	0.990293		16.0431	16.023	15.6656	15.9307	15.9954	16.0082	16.1551	16.1552	16.3096	15.9951	15.9672	15.7148	16.0595	16.2185	16.0664
mt-Cytb	ENSMUSG00000064370	ENSMUSG00000064370	0.101252	0.960801	-0.125131	0.995681	0.0701381	0.981374	0.0370661	0.993307		14.0609	13.9837	14.5628	14.171	14.176	14.2201	14.1108	14.1108	14.2428	14.0299	14.1227	14.7803	14.3041	13.5871	14.3628
mt-Nd1	ENSMUSG00000064341	ENSMUSG00000064341	-0.0457444	0.976231	-0.00523325	0.995681	-0.0417339	0.985028	-0.034167	0.992218		14.1941	14.2933	14.5769	14.338	14.3858	14.4685	14.4863	14.4718	14.2475	14.3923	14.2419	14.4652	14.6488	14.222	14.3239
mt-Nd2	ENSMUSG00000064345	ENSMUSG00000064345	-0.166384	0.839079	-0.0715967	0.995681	-0.0444113	0.984334	0.051285	0.991778		15.1691	15.1033	14.6605	14.8341	14.9638	15.0253	14.8899	15.0101	15.1997	15.1531	15.0676	14.972	15.0609	15.3413	15.062
Lgals1	ENSMUSG00000068220	ENSMUSG00000068220	-0.179757	0.741211	0.115307	0.993883	-0.133651	0.839554	0.0356614	0.992218		14.4232	14.4766	14.1667	14.2896	14.3155	14.3713	14.5782	14.5212	14.3787	14.3922	14.1963	14.1378	14.4493	14.6989	14.4615
S100a6	ENSMUSG00000001025	ENSMUSG00000001025	0.041955	0.97354	0.0557519	0.995681	-0.015754	0.989047	0.00829155	0.995065		13.4963	13.4586	13.7322	13.5167	13.5359	13.624	13.629	13.5612	13.5596	13.4487	13.5359	13.5497	13.5858	13.2681	13.6912
Rps14	ENSMUSG00000024608	ENSMUSG00000024608	-0.110259	0.92269	0.0854567	0.995681	-0.0798664	0.955089	0.0369593	0.992218		14.0514	14.0762	13.7615	13.8951	13.9352	13.9671	14.0757	14.2144	13.8332	14.0802	13.8074	13.7426	14.1004	14.3078	13.784
Mgp	ENSMUSG00000030218	ENSMUSG00000030218	-0.424947	0.573957	-1.02056	0.000766524	-0.539719	0.262858	-0.761598	0.0393856		11.8622	11.8197	11.9047	12.7678	12.7267	12.3386	12.3635	12.1141	12.6736	12.4482	12.5981	13.407	12.1283	12.2769	12.4398
mt-Rnr1	ENSMUSG00000064337	ENSMUSG00000064337	0.018169	0.993088	0.114264	0.995681	0.0844776	0.944146	0.141292	0.967914		14.6717	14.7134	14.2055	14.3023	14.405	14.5049	14.3572	14.4392	14.584	14.5215	14.568	14.1807	14.6112	14.518	14.4549
Fth1	ENSMUSG00000024661	ENSMUSG00000024661	-0.0155203	0.995127	0.0495441	0.995681	-0.0738148	0.95768	-0.16634	0.967914		12.8963	13.0527	13.447	13.3431	13.3162	13.2938	13.3785	13.0853	13.1971	13.0566	13.1386	13.1098	13.3849	12.8825	13.1902
Hsp90ab1	ENSMUSG00000023944	ENSMUSG00000023944	0.00829348	0.995885	0.151064	0.993883	0.00344144	0.999106	0.289938	0.7744		14.3831	14.2461	13.7634	13.8218	13.8636	13.9062	13.9744	14.2865	14.174	14.1186	13.9352	13.9481	13.9522	14.4067	14.0369
Tuba1b	ENSMUSG00000023004	ENSMUSG00000023004	-0.511347	0.0907729	-0.214752	0.922293	-0.387961	0.312395	-0.195097	0.966979		12.6979	12.7435	12.9377	12.9557	12.9118	13.102	13.4625	13.2223	12.7919	13.0496	12.7606	13.192	13.2755	13.4285	13.212
Rpl37	ENSMUSG00000041841	ENSMUSG00000041841	-0.240261	0.646328	-0.105307	0.995681	-0.12601	0.874318	-0.0866043	0.98912		12.9388	13.1422	13.26	13.163	13.2003	13.2552	13.365	13.3491	12.9943	13.288	13.1134	13.2682	13.4151	13.4734	13.1749
Malat1	ENSMUSG00000092341	ENSMUSG00000092341	-0.286731	0.812248	-0.477862	0.599637	-0.318694	0.736954	0.132643	0.990293		12.829	12.3645	12.5176	12.3549	12.4618	12.5307	12.7134	12.6918	13.2331	12.9772	12.978	13.2145	12.1152	13.2274	13.0414
Rps26	ENSMUSG00000025362	ENSMUSG00000025362	-0.229082	0.804828	-0.237401	0.918369	-0.0640715	0.975843	-0.135399	0.982436		12.5949	12.6607	12.8066	12.8239	12.8189	12.8344	12.8556	12.9371	12.4186	12.9533	12.6863	13.1116	13.0053	13.1653	12.5091
Hspa5	ENSMUSG00000026864	ENSMUSG00000026864	-0.0306126	0.991447	0.0204154	0.995681	-0.00299195	0.999106	0.00905627	0.995331		13.661	13.7678	13.2798	13.5255	13.6034	13.5945	13.5326	13.6966	13.5249	13.6465	13.5292	13.5111	13.6694	13.8283	13.295
Vim	ENSMUSG00000026728	ENSMUSG00000026728	0.241121	0.714279	0.252258	0.82291	0.238952	0.678885	0.260706	0.792336		12.5981	12.5072	13.0682	12.4167	12.5079	12.5325	12.5042	12.561	12.4575	12.5661	12.4373	12.4783	12.7042	12.2523	12.5261
Gm11942	ENSMUSG00000094344	ENSMUSG00000094344	-0.115226	0.928584	-0.200533	0.949728	-0.132978	0.915919	0.00121938	0.998797		13.0943	12.9562	12.7806	12.8981	12.8897	13.0503	12.7528	13.288	13.1533	12.9643	13.2135	13.2541	12.8232	13.3801	12.9268
Rps21	ENSMUSG00000039001	ENSMUSG00000039001	-0.212738	0.801679	-0.0325622	0.995681	-0.10232	0.93969	-0.127203	0.982436		12.4247	12.5514	12.9282	12.7733	12.7589	12.804	12.9831	12.7629	12.4704	12.7342	12.5638	12.7476	13.0804	12.7252	12.7601
Rps12	ENSMUSG00000061983	ENSMUSG00000061983	-0.0332968	0.983661	-0.044745	0.995681	0.0319457	0.985028	0.043976	0.991778		12.8155	12.8838	12.8944	12.8225	12.8032	12.8375	12.817	12.9763	12.692	12.9025	12.7375	13.07	12.9416	13.041	12.6899
Acta2	ENSMUSG00000035783	ENSMUSG00000035783	-0.244973	0.795016	-0.178643	0.993883	-0.456626	0.262858	-0.664438	0.0297353		12.3115	12.4269	11.7548	12.9261	12.8928	12.7422	12.501	12.5368	12.8765	12.0244	12.3864	12.6357	12.4282	12.3896	12.4905
Tubb5	ENSMUSG00000001525	ENSMUSG00000001525	-0.0298754	0.984235	0.0186768	0.995681	-0.0550031	0.956507	-0.10089	0.975769		13.1329	13.2213	12.9672	13.2077	13.1964	13.2297	13.0776	13.1302	13.2809	13.0569	13.2457	12.9583	13.253	13.0708	13.0902
Sparc	ENSMUSG00000018593	ENSMUSG00000018593	-0.252986	0.690721	-0.387615	0.34858	-0.407959	0.163553	-0.268838	0.768896		12.4193	12.2772	12.178	12.6306	12.521	12.5351	12.5946	12.5487	12.9322	12.5324	12.7011	12.7993	12.2252	12.6411	12.7276
Gm13340	ENSMUSG00000083563	ENSMUSG00000083563	-0.210651	0.839079	-0.00803959	0.995681	-0.0705435	0.968817	-0.192866	0.967914		12.3044	12.6173	12.4535	12.6118	12.6381	12.7184	12.5985	12.7559	12.1923	12.7121	12.3448	12.326	12.9391	12.7477	12.2531
Rps5	ENSMUSG00000012848	ENSMUSG00000012848	-0.216276	0.771928	0.0154984	0.995681	-0.167943	0.840213	0.0246722	0.993307		12.7854	12.831	12.6288	12.6832	12.7102	12.783	13.0965	12.9833	12.6371	12.9769	12.6346	12.5594	12.9305	13.1809	12.7574
Rplp1	ENSMUSG00000007892	ENSMUSG00000007892	-0.0439771	0.984235	0.0921163	0.995681	0.176084	0.84798	0.120066	0.98912		13.1325	13.2219	12.5727	12.8966	12.8689	12.8813	12.8622	12.9088	12.6998	12.9812	12.7904	12.952	13.1931	13.2037	12.683
S100a4	ENSMUSG00000001020	ENSMUSG00000001020	0.0784216	0.961849	0.209881	0.949518	0.146792	0.908135	0.103021	0.990293		13.4347	13.483	12.8794	13.1015	13.2137	13.2423	13.046	13.3549	13.0028	13.1985	13.0589	12.9745	13.3217	13.4063	12.8461
Cald1	ENSMUSG00000029761	ENSMUSG00000029761	-0.368055	0.695561	-0.417831	0.698196	-0.35169	0.675287	-0.017645	0.994176		12.1347	11.8629	11.5133	11.8886	11.8768	11.8626	11.8931	12.149	12.5183	12.1197	12.1483	12.5232	11.6666	12.604	12.2576
Eif4g2	ENSMUSG00000005610	ENSMUSG00000005610	-0.0408936	0.984321	0.0420722	0.995681	0.00988475	0.994893	-0.175241	0.967914		11.9619	12.1756	12.3226	12.3268	12.2845	12.3962	12.2388	12.3313	11.8386	12.228	12.0481	12.0757	12.4855	12.1498	11.9136
Cd63	ENSMUSG00000025351	ENSMUSG00000025351	0.102387	0.926242	-0.27795	0.703855	-0.0242182	0.988899	0.0200947	0.993307		11.9841	11.7321	12.0901	11.8981	11.9916	11.879	11.9002	11.8996	12.0952	12.0443	12.2019	12.3961	11.7558	11.628	12.0992
Gm9625	ENSMUSG00000097906	ENSMUSG00000097906	-0.112627	0.949762	-0.0503311	0.995681	0.0577245	0.985028	-0.226992	0.966979		11.7882	12.0443	12.1039	12.2054	12.2062	12.2252	12.0659	12.1074	11.545	12.1529	11.9607	11.9863	12.4738	12.1257	11.5476
Myh9	ENSMUSG00000022443	ENSMUSG00000022443	-0.137472	0.879839	-0.00599861	0.995681	-0.148042	0.847455	-0.0715636	0.990293		12.9541	12.9106	12.471	12.8465	12.8683	12.8807	12.8132	12.9919	13.0118	12.8256	12.7685	12.8043	12.9138	13.1392	12.7077
Rps29	ENSMUSG00000034892	ENSMUSG00000034892	-0.302831	0.632143	-0.127788	0.995681	-0.179629	0.840213	-0.18868	0.966979		11.8418	11.9904	12.1583	12.1914	12.1432	12.2389	12.4341	12.2366	11.8082	12.2722	11.8971	12.1966	12.4944	12.2868	12.1102
Rps15	ENSMUSG00000063457	ENSMUSG00000063457	-0.234132	0.638164	-0.0189102	0.995681	-0.167218	0.783347	-0.072079	0.990293		12.6997	12.7194	12.451	12.6752	12.6829	12.7408	12.9363	12.7918	12.6416	12.799	12.5702	12.5583	12.8036	13.0434	12.7184
Timp2	ENSMUSG00000017466	ENSMUSG00000017466	0.000306963	0.999747	0.00963811	0.995681	-0.0884366	0.93969	-0.0187315	0.993307		13.0639	12.9173	12.5909	12.9031	12.8708	12.8919	12.8883	12.9017	13.0772	12.8949	12.9973	12.6698	12.7159	13.018	12.8591
Serbp1	ENSMUSG00000036371	ENSMUSG00000036371	-0.180187	0.763717	-0.0565395	0.995681	-0.107398	0.907779	0.0434047	0.992218		12.5278	12.6258	12.3695	12.4937	12.4312	12.477	12.7534	12.6303	12.4557	12.7155	12.5281	12.4458	12.6121	12.8754	12.5658
Col1a1	ENSMUSG00000001506	ENSMUSG00000001506	0.0599675	0.963295	0.0392093	0.995681	0.0149677	0.989322	-0.110111	0.982436		12.5111	12.4956	12.1322	12.5143	12.5237	12.4586	12.2849	12.4897	12.3401	12.2333	12.2172	12.5705	12.3812	12.4603	12.1249
Rack1	ENSMUSG00000020372	ENSMUSG00000020372	0.0094385	0.995885	0.099882	0.995681	0.0780248	0.956453	-0.0483267	0.992218		11.7506	12.0311	12.2097	12.0242	12.0186	12.1301	12.0921	11.9995	11.6722	11.9599	11.8691	11.9009	12.2438	11.8782	11.8454
Col1a2	ENSMUSG00000029661	ENSMUSG00000029661	-0.0316206	0.991488	-0.0934759	0.995681	-0.0997413	0.956453	-0.146364	0.98795		11.9219	11.5293	11.8755	11.8993	11.9068	11.9892	11.8775	11.7771	11.9944	11.6838	11.7797	12.1345	11.8717	11.2428	12.1861
Mt1	ENSMUSG00000031765	ENSMUSG00000031765	-0.154865	0.812248	-0.166268	0.914533	-0.130745	0.840213	-0.00962056	0.994176		12.0833	12.2066	12.0261	12.0743	12.1563	12.1181	12.0888	12.3622	12.2487	12.2919	12.2412	12.2854	12.0798	12.4894	12.1834
Rplp2	ENSMUSG00000025508	ENSMUSG00000025508	-0.4208	0.103377	-0.212769	0.849265	-0.312441	0.362086	-0.223493	0.858547		11.6643	11.8059	11.7017	12.0115	11.8726	11.9572	12.2884	12.0513	11.7151	12.0189	11.8143	11.9719	12.2359	12.1646	12.0282
Atp5g3	ENSMUSG00000018770	ENSMUSG00000018770	-0.159405	0.903694	-0.126456	0.995681	-0.107853	0.946219	-0.185591	0.967914		11.0694	11.1908	11.8033	11.5608	11.5308	11.6426	11.772	11.4767	11.1974	11.555	11.4776	11.5255	11.7521	11.2352	11.6222
Tmsb4x	ENSMUSG00000049775	ENSMUSG00000049775	0.138323	0.977453	-0.0322525	0.995681	0.0586612	0.989047	0.0495685	0.993307		10.7746	10.3689	11.4927	10.8674	10.8924	10.9575	11.0596	10.9911	10.5995	10.8499	10.456	11.4726	11.1501	9.71156	11.1698
mt-Nd6	ENSMUSG00000064368	ENSMUSG00000064368	0.210047	0.93164	-0.275591	0.995681	0.425485	0.782161	0.210937	0.98912		10.8829	10.7665	11.1987	10.7654	10.8957	10.5742	10.4051	10.218	10.8999	10.9348	10.8624	11.7393	10.6099	10.4017	11.1411
Tuba1c	ENSMUSG00000043091	ENSMUSG00000043091	-0.340349	0.531711	-0.0841057	0.995681	-0.211525	0.794594	0.204268	0.964166		12.0597	11.9562	11.6066	11.6319	11.6005	11.805	12.0706	12.1581	12.061	12.072	11.8694	11.9613	11.898	12.5796	12.1141
Cavin1	ENSMUSG00000004044	ENSMUSG00000004044	0.274307	0.733122	0.339606	0.721947	0.26147	0.72901	0.35608	0.746342		12.7689	12.4338	12.1206	12.0703	12.1394	12.1164	11.9021	12.3771	12.2885	12.1254	12.1317	12.119	12.0316	12.5276	11.9409
Bgn	ENSMUSG00000031375	ENSMUSG00000031375	-0.15357	0.918562	-0.273306	0.922954	-0.337418	0.666618	-0.109328	0.990293		11.8976	11.4873	11.2689	11.6907	11.678	11.6819	11.6434	11.8138	12.216	11.6202	11.9369	11.9604	11.1891	11.9571	11.9161
Calm1	ENSMUSG00000001175	ENSMUSG00000001175	0.0113826	0.994845	0.0177197	0.995681	0.0457658	0.968258	0.0453934	0.990293		11.7848	11.8994	11.9544	11.8263	11.8251	11.8581	11.8737	11.9595	11.6587	11.9576	11.8232	11.8073	11.994	11.8759	11.7289
Rplp0	ENSMUSG00000067274	ENSMUSG00000067274	-0.104157	0.91046	-0.0495312	0.995681	-0.00406666	0.997197	-0.0101954	0.994468		12.0737	12.1773	11.8415	12.0302	12.0235	12.086	11.9826	12.151	11.9818	12.1464	11.9566	12.1469	12.2659	12.2564	11.8639
Rpl23	ENSMUSG00000071415	ENSMUSG00000071415	-0.390881	0.632143	-0.253046	0.949477	-0.224672	0.840213	-0.0736427	0.992218		10.6697	10.7208	11.4327	11.0444	10.967	11.1642	11.534	11.1796	10.8369	11.2459	10.9216	11.4949	11.4567	11.3492	11.3232
Anxa2	ENSMUSG00000032231	ENSMUSG00000032231	0.159595	0.781145	0.198246	0.792289	0.10422	0.888799	0.181718	0.880484		12.3604	12.3529	12.2111	12.0562	12.1621	12.1627	12.2313	12.2993	12.0754	12.2165	12.1807	11.9192	12.1863	12.2346	12.0192
Rps20	ENSMUSG00000028234	ENSMUSG00000028234	0.168257	0.814175	0.324403	0.447662	0.118126	0.898394	0.224443	0.827575		12.9689	12.8529	12.4165	12.4888	12.5529	12.5764	12.5738	12.7363	12.6231	12.4254	12.4655	12.4283	12.6174	12.7068	12.4518
Eef2	ENSMUSG00000034994	ENSMUSG00000034994	-0.0158949	0.992303	0.112424	0.993883	0.0120275	0.989147	0.131238	0.966979		12.4262	12.3836	12.1284	12.1737	12.1845	12.201	12.2018	12.3249	12.384	12.2286	12.2211	12.1653	12.2308	12.4941	12.2604
Rps28	ENSMUSG00000067288	ENSMUSG00000067288	0.107254	0.904898	-0.193459	0.888255	-0.116302	0.899748	-0.162147	0.964166		11.1834	11.1468	11.475	11.4783	11.4586	11.38	11.2803	11.379	11.5133	11.322	11.494	11.5842	11.2186	10.9649	11.3079
Rpl37a	ENSMUSG00000046330	ENSMUSG00000046330	-0.131712	0.904898	0.056347	0.995681	-0.129229	0.915628	0.0737163	0.990293		11.0214	11.1452	11.6215	11.1685	11.16	11.3122	11.6126	11.3961	11.2173	11.3614	11.0081	11.3035	11.4181	11.354	11.4858
Ubc	ENSMUSG00000008348	ENSMUSG00000008348	0.499104	0.023498	0.111248	0.995681	0.421677	0.0971967	0.302438	0.632055		11.8363	11.8675	11.5857	11.5866	11.4802	11.3159	11.1997	11.2747	11.5425	11.6034	11.8332	11.5145	11.1799	11.3786	11.2418
Mmp3	ENSMUSG00000043613	ENSMUSG00000043613	-0.745017	0.00176008	-1.01849	1.09178e-07	-0.892276	1.69623e-05	-0.63741	0.0195543		10.1574	10.3353	10.5098	11.0691	10.96	10.9024	11.4529	10.8618	11.3213	11.3568	11.3386	11.3826	10.788	11.1442	11.2837
Myl12a	ENSMUSG00000024048	ENSMUSG00000024048	0.386797	0.864651	-0.000850753	0.999777	0.325235	0.902042	-0.0903629	0.992218		10.2304	10.4462	11.2408	10.8867	10.831	10.6696	10.3168	10.3486	10.4819	10.4804	10.8259	10.797	10.6871	9.32485	10.6006
mt-Co1	ENSMUSG00000064351	ENSMUSG00000064351	0.0099992	0.995456	-0.0841476	0.995681	0.0284441	0.985028	0.0882815	0.980471		11.796	11.8798	11.7187	11.6548	11.6339	11.8356	11.7206	11.7313	11.8558	11.8516	11.8576	11.9378	11.8962	11.6575	11.8032
Rpl18a	ENSMUSG00000045128	ENSMUSG00000045128	-0.289047	0.425597	-0.109025	0.995681	-0.188399	0.721763	-0.074338	0.990293		11.8341	11.8129	11.4781	11.7912	11.7402	11.8373	11.822	11.9853	11.9004	11.8501	11.6355	11.9685	11.9291	12.1526	11.9197
Rpl8	ENSMUSG00000003970	ENSMUSG00000003970	-0.0246502	0.991488	0.122587	0.995681	0.0500417	0.979853	0.187394	0.95908		12.7179	12.6569	12.0951	12.3159	12.336	12.3306	12.4388	12.5012	12.4535	12.4733	12.4008	12.2974	12.541	12.6656	12.3991
Timp1	ENSMUSG00000001131	ENSMUSG00000001131	-0.432649	0.0907729	-0.549211	0.013566	-0.621881	0.00134553	-0.529951	0.0195543		10.7814	10.8412	10.9981	11.5113	11.3112	11.3898	11.4114	11.3407	11.716	11.275	11.5656	11.423	11.3034	11.1455	11.4634
Hsp90aa1	ENSMUSG00000021270	ENSMUSG00000021270	0.028014	0.991075	0.037769	0.995681	0.00527732	0.996534	0.268373	0.683203		12.07	12.1418	11.8273	11.738	11.7097	11.8012	12.0121	12.0146	12.0121	12.102	11.9448	11.8862	11.7972	12.2155	11.9253
mt-Nd5	ENSMUSG00000064367	ENSMUSG00000064367	0.0893014	0.928991	-0.093623	0.995681	0.175816	0.782161	0.153379	0.966979		11.8488	11.8899	11.4778	11.5487	11.6175	11.6199	11.414	11.5258	11.7584	11.7913	11.7663	11.961	11.5739	11.7114	11.6898
Ptma	ENSMUSG00000026238	ENSMUSG00000026238	0.111167	0.926242	0.0604207	0.995681	0.0364471	0.988751	0.0868638	0.990293		12.3892	12.3308	11.8149	12.1357	12.1525	12.047	11.8855	12.1946	12.3681	12.1362	12.2651	12.004	12.0781	12.1865	11.9934
Rpl22	ENSMUSG00000028936	ENSMUSG00000028936	-0.0605576	0.963927	0.0227035	0.995681	-0.0440514	0.984334	-0.0530791	0.991778		11.1293	11.3234	11.5605	11.3524	11.388	11.4672	11.5047	11.4989	11.151	11.4565	11.194	11.3202	11.5776	11.3567	11.2805
Prdx1	ENSMUSG00000028691	ENSMUSG00000028691	-0.105527	0.934467	-0.13831	0.995681	0.00145421	0.999106	-0.310627	0.753568		10.7631	10.9222	11.2363	11.3921	11.2838	11.2161	11.0987	11.084	10.7553	11.1732	11.0723	11.1348	11.4155	10.9429	10.8608
Serpine2	ENSMUSG00000026249	ENSMUSG00000026249	0.110694	0.934467	0.202144	0.958952	0.165668	0.874318	0.00658673	0.9973		12.1151	12.1937	11.7336	11.8964	12.1209	12.0353	11.6927	12.0868	11.7741	11.8907	11.8091	11.7726	12.0814	12.1032	11.482
Rps3	ENSMUSG00000030744	ENSMUSG00000030744	0.0534804	0.977398	0.155587	0.993883	0.076997	0.959691	0.0149436	0.993307		11.1051	11.2547	11.4972	11.2789	11.219	11.3427	11.4463	11.2813	10.8703	11.2191	11.0497	11.1482	11.523	11.0676	11.0898
Rpl12	ENSMUSG00000038900	ENSMUSG00000038900	-0.147055	0.804828	0.0320655	0.995681	-0.0813619	0.926954	-0.0212121	0.993307		11.447	11.5085	11.5772	11.5143	11.5643	11.5225	11.674	11.6654	11.4287	11.4929	11.2972	11.6311	11.6978	11.6792	11.5992
Rpl7	ENSMUSG00000043716	ENSMUSG00000043716	0.118476	0.900548	0.162154	0.957479	0.141623	0.856528	0.170793	0.964166		12.3436	12.2978	11.9163	11.9979	12.0734	12.0072	11.8346	12.163	12.1464	12.1075	12.0102	11.9849	12.101	12.2191	11.8978
Rps13	ENSMUSG00000090862	ENSMUSG00000090862	-0.147555	0.886315	0.0886076	0.995681	0.0148359	0.989792	-0.0557438	0.991778		11.3343	11.4946	11.5037	11.4667	11.4519	11.5848	11.6479	11.5157	11.0704	11.5068	11.2346	11.3197	11.8238	11.519	11.4059
Ywhae	ENSMUSG00000020849	ENSMUSG00000020849	-0.163508	0.767606	-0.154442	0.921832	-0.0848564	0.922007	-0.0471935	0.990293		11.2012	11.3204	11.4234	11.3876	11.3241	11.3858	11.4657	11.4731	11.2628	11.5416	11.3417	11.5278	11.5785	11.5348	11.3201
Eef1b2	ENSMUSG00000025967	ENSMUSG00000025967	-0.0225715	0.991488	0.0113574	0.995681	0.00817541	0.994893	0.0349391	0.992218		11.5145	11.5669	11.5837	11.4909	11.5196	11.5515	11.5513	11.6731	11.4055	11.6448	11.4113	11.567	11.6325	11.7043	11.3769
Rpl41	ENSMUSG00000093674	ENSMUSG00000093674	-0.379152	0.360587	-0.0725294	0.995681	-0.305214	0.551901	0.0122777	0.994468		10.8379	10.8974	11.3259	10.9856	10.9201	11.1649	11.6135	11.1993	11.1761	11.227	10.9154	11.174	11.3101	11.4643	11.4738
Rpl36a	ENSMUSG00000079435	ENSMUSG00000079435	0.0211096	0.991488	0.0594421	0.995681	0.0960252	0.932952	0.104718	0.98319		11.2462	11.1669	11.4503	11.1387	11.1448	11.2811	11.3128	11.2402	11.0262	11.155	11.0655	11.4532	11.4082	11.1859	11.2145
Rpl11	ENSMUSG00000059291	ENSMUSG00000059291	-0.154056	0.879839	-0.16989	0.98619	0.0182455	0.989147	-0.10282	0.98912		10.8487	10.8904	11.2305	11.1275	11.082	11.1041	11.0379	11.1376	10.7483	11.1282	11.0081	11.356	11.3229	11.2241	10.8841
Tpm4	ENSMUSG00000031799	ENSMUSG00000031799	-0.278062	0.740365	-0.47936	0.34858	-0.301409	0.660305	-0.461822	0.433458		10.4383	10.4255	10.8458	11.0593	11.1476	10.9231	10.9543	10.7993	10.9007	10.8593	10.8486	11.4083	10.8441	10.5415	11.1418
Ncl	ENSMUSG00000026234	ENSMUSG00000026234	0.208341	0.736089	-0.0654818	0.995681	0.231894	0.639706	0.225091	0.854558		11.3266	11.2602	11.4113	11.2029	11.1978	10.9088	11.0365	10.9853	11.2714	11.537	11.4926	11.1398	11.019	11.1907	11.1644
Gpx1	ENSMUSG00000063856	ENSMUSG00000063856	-0.384438	0.531711	-0.112327	0.995681	-0.324561	0.620746	-0.351386	0.753568		10.8871	10.9261	11.0969	11.2638	11.3062	11.4001	11.6483	11.3066	10.8203	11.2404	10.8501	11.1388	11.5172	11.4533	11.0602
Rpl34	ENSMUSG00000062006	ENSMUSG00000062006	0.225379	0.852058	0.234216	0.97081	0.42302	0.46251	0.0466337	0.992218		11.0713	11.3077	11.3004	11.0392	11.2687	11.2354	10.9514	10.9624	10.4563	11.1479	10.8259	10.9995	11.5001	10.6826	10.6692
Itgb1	ENSMUSG00000025809	ENSMUSG00000025809	-0.0525014	0.961849	-0.220971	0.68434	-0.0734887	0.93969	-0.262576	0.577986		10.9648	10.981	11.2519	11.3818	11.3745	11.2493	11.2986	11.0854	11.0464	11.3067	11.3329	11.2448	11.175	11.0517	11.1515
Pabpc1	ENSMUSG00000022283	ENSMUSG00000022283	0.349162	0.174627	0.216626	0.786204	0.34157	0.163553	0.217905	0.781269		11.6042	11.6566	11.5999	11.381	11.4752	11.3492	11.1682	11.3526	11.3106	11.4142	11.5718	11.2037	11.4098	11.0663	11.3177
Rps7	ENSMUSG00000061477	ENSMUSG00000061477	-0.302366	0.714279	-0.0912706	0.995681	-0.186247	0.867461	-0.15841	0.980471		10.4793	10.7003	11.1721	11.0214	10.8849	11.0113	11.2088	11.0854	10.654	10.9553	10.7019	11.0419	11.3592	11.0317	10.9256
Id3	ENSMUSG00000007872	ENSMUSG00000007872	0.139614	0.976231	0.118223	0.995681	0.0730703	0.988899	-0.0566186	0.993307		9.98742	9.84958	11.0213	10.5717	10.436	10.3133	10.4773	10.0867	10.3539	10.0074	10.1559	10.5828	10.5823	9.18912	10.5824
Eif2s2	ENSMUSG00000074656	ENSMUSG00000074656	0.192309	0.814175	0.126683	0.995681	0.204571	0.780808	0.3075	0.725759		12.2326	12.2925	11.7354	11.8344	11.7176	11.8419	11.7405	11.9419	12.0103	12.0829	12.042	11.7989	11.8234	12.0926	11.8085
Lox	ENSMUSG00000024529	ENSMUSG00000024529	-0.349754	0.690721	-0.33433	0.82826	-0.38987	0.549007	-0.456383	0.621735		11.0348	10.7676	10.5227	11.2661	11.2314	11.2354	10.9207	11.236	11.3447	10.7696	11.0835	11.4364	10.6352	11.3572	11.3146
Rps27	ENSMUSG00000090733	ENSMUSG00000090733	-0.142318	0.886131	0.126441	0.995681	-0.101302	0.93837	-0.0291531	0.993307		10.9458	11.0312	11.3608	11.1088	11.1524	11.2025	11.4616	11.2018	10.9761	11.0699	10.876	11.0451	11.4187	11.0974	11.2698
Pa2g4	ENSMUSG00000025364	ENSMUSG00000025364	-0.128977	0.892449	-0.0105796	0.995681	-0.0567147	0.968258	0.0827086	0.990293		11.7184	11.7593	11.5027	11.5945	11.5679	11.5803	11.7891	11.8415	11.5082	11.8682	11.6782	11.4461	11.7916	11.9383	11.6306
Atp1a1	ENSMUSG00000033161	ENSMUSG00000033161	-0.246459	0.752943	-0.390008	0.499523	-0.09745	0.944146	-0.380929	0.583389		10.5124	10.7654	10.7856	11.0629	11.0298	11.1277	10.9281	10.9226	10.4777	11.0007	10.9732	11.2572	11.1743	11.0025	10.5783
Fn1	ENSMUSG00000026193	ENSMUSG00000026193	0.12319	0.894787	-0.230955	0.826007	-0.0300031	0.988899	-0.197735	0.93064		10.8204	10.7231	10.8715	11.0639	11.0609	10.8797	10.7472	10.8531	10.9062	10.7455	10.9831	11.3228	10.6199	10.7224	10.708
Arpc1b	ENSMUSG00000029622	ENSMUSG00000029622	-0.0866316	0.961849	-0.262256	0.90814	-0.0522366	0.985028	0.049833	0.992218		10.8455	10.7872	10.6942	10.7842	10.7542	10.6372	10.608	10.94	10.9148	10.7773	10.8537	11.3992	10.4932	11.1968	10.8122
Flna	ENSMUSG00000031328	ENSMUSG00000031328	-0.314867	0.360587	-0.144674	0.98619	-0.331916	0.28107	-0.282181	0.683954		11.5056	11.4827	11.0832	11.6609	11.6265	11.6608	11.6447	11.5619	11.8728	11.3853	11.5549	11.5878	11.5911	11.6484	11.7993
Fstl1	ENSMUSG00000022816	ENSMUSG00000022816	-0.173596	0.839079	-0.316737	0.603706	-0.450341	0.112749	-0.492223	0.0963581		10.7083	10.8011	10.836	11.3537	11.2617	11.2038	11.2843	10.9991	11.3876	11.028	11.335	10.9012	10.7628	10.8935	11.182
Hmga2	ENSMUSG00000056758	ENSMUSG00000056758	0.275328	0.78423	0.0400152	0.995681	0.300059	0.696897	0.471747	0.519603		10.4863	10.683	11.1297	10.3233	10.2608	10.3839	10.4406	10.5663	10.4745	10.9668	10.9897	10.1659	10.4327	10.5119	10.6086
Eif4g1	ENSMUSG00000045983	ENSMUSG00000045983	-0.217125	0.633765	-0.259642	0.565949	-0.158754	0.772488	-0.0376787	0.992218		11.4006	11.3811	11.1726	11.3896	11.3253	11.3574	11.3784	11.4163	11.629	11.484	11.7457	11.4937	11.4388	11.5956	11.5718
Calr	ENSMUSG00000003814	ENSMUSG00000003814	-0.0762537	0.945168	-0.0679396	0.995681	-0.153015	0.824172	-0.0830005	0.98912		11.7161	11.6637	11.3649	11.6613	11.7398	11.6091	11.624	11.6676	11.9141	11.6283	11.6937	11.6451	11.5541	11.8414	11.579
Rpl4	ENSMUSG00000032399	ENSMUSG00000032399	0.176352	0.889171	-0.127166	0.995681	0.18764	0.861095	0.180213	0.967914		10.2793	10.3368	10.9004	10.4803	10.2761	10.3048	10.185	10.4558	10.3948	10.5065	10.4493	10.9741	10.4612	10.1299	10.4671
Gm8649	ENSMUSG00000097669	ENSMUSG00000097669	-0.273524	0.714279	0.0241098	0.995681	-0.0908738	0.9519	-0.176339	0.967914		10.9836	11.2477	11.11	11.2387	11.2572	11.3818	11.2884	11.4098	10.8744	11.3094	10.9692	10.9764	11.5929	11.4865	11.0337
Rps17	ENSMUSG00000061787	ENSMUSG00000061787	-0.320844	0.333507	-0.0452713	0.995681	-0.189593	0.733707	-0.0994023	0.98795		10.8193	10.8833	11.1644	11.0868	11.0506	11.0574	11.3307	11.1376	10.9746	11.1591	10.8795	10.9808	11.3898	11.2857	11.1746
Gm2522	ENSMUSG00000107450	ENSMUSG00000107450	0.0235295	0.993088	0.0143488	0.995681	0.0714894	0.977471	-0.192492	0.967914		10.6326	10.9989	11.0246	11.0371	11.1572	11.0703	10.9021	11.0662	10.4368	10.9762	10.8333	10.8336	11.2388	10.8838	10.3667
Fus	ENSMUSG00000030795	ENSMUSG00000030795	0.393584	0.525098	0.247149	0.925162	0.420743	0.390125	0.34492	0.768896		12.0085	11.9644	11.3216	11.4418	11.5003	11.4108	11.1782	11.6303	11.2787	11.5657	11.6363	11.4384	11.3998	11.6839	11.0566
Hmgn1	ENSMUSG00000040681	ENSMUSG00000040681	-0.198229	0.785518	-0.0828632	0.995681	-0.113668	0.915628	0.0481005	0.992218		10.9244	10.7533	11.0521	10.8832	10.7695	10.9466	11.1361	11.0298	10.9148	10.8513	10.8522	11.2535	10.9269	11.2422	11.1556
Tcf4	ENSMUSG00000053477	ENSMUSG00000053477	-0.0856726	0.945168	-0.311828	0.578605	-0.225969	0.690536	-0.148271	0.967914		10.9944	10.9123	11.0141	11.1402	11.1462	11.0802	11.145	11.0291	11.4011	11.2853	11.3709	11.1966	10.7296	11.0994	11.2961
Ahnak	ENSMUSG00000069833	ENSMUSG00000069833	0.332187	0.62655	0.145196	0.995681	0.372545	0.44726	0.367342	0.684646		10.4681	10.2749	11.0464	10.2711	10.4167	10.113	10.403	10.0989	10.2829	10.4266	10.4909	10.56	10.2634	10.195	10.4516
Hnrnpu	ENSMUSG00000039630	ENSMUSG00000039630	0.113304	0.951761	0.00608015	0.995757	0.139957	0.93969	-0.0773436	0.991778		10.1451	10.2826	10.9671	10.5477	10.6084	10.6188	10.5258	10.4589	10.1064	10.5056	10.4261	10.5894	10.8008	10.1732	10.1284
Rps8	ENSMUSG00000047675	ENSMUSG00000047675	-0.0198469	0.991488	0.0424052	0.995681	0.0212299	0.988899	0.166138	0.834431		11.4204	11.4144	11.3417	11.1917	11.1572	11.3243	11.3567	11.4647	11.2848	11.2831	11.279	11.4762	11.404	11.4462	11.3839
Rpsa	ENSMUSG00000032518	ENSMUSG00000032518	-0.496256	0.00469472	-0.198011	0.827087	-0.345026	0.136605	-0.162489	0.945445		11.2105	11.1989	10.9268	11.2509	11.2044	11.3737	11.5451	11.4228	11.4089	11.3614	11.2229	11.3517	11.4368	11.7504	11.6296
Hint1	ENSMUSG00000020267	ENSMUSG00000020267	-0.292003	0.430103	-0.121015	0.993883	-0.114844	0.902042	-0.0946194	0.98912		10.6843	10.8245	11.0203	10.9807	10.8916	10.9644	11.098	10.9787	10.8077	10.9546	10.8303	11.1173	11.1927	11.2445	10.9783
Rps24	ENSMUSG00000025290	ENSMUSG00000025290	0.128413	0.928593	-0.0733021	0.995681	0.117374	0.940767	0.199003	0.967914		10.5015	10.3264	10.8667	10.3605	10.3618	10.4358	10.3827	10.5337	10.483	10.4766	10.3976	11.0163	10.6965	10.1249	10.4922
Laptm4a	ENSMUSG00000020585	ENSMUSG00000020585	-0.234661	0.714279	-0.254905	0.78792	-0.284294	0.524574	-0.263729	0.769126		10.6451	10.6164	10.7502	10.9417	10.8766	10.9865	11.0776	10.9779	10.7992	10.7122	10.7321	11.2636	10.8671	10.9009	10.951
Gm12341	ENSMUSG00000080763	ENSMUSG00000080763	-0.499263	0.27294	-0.349724	0.767027	-0.115608	0.944146	-0.435494	0.621735		10.6263	10.8139	10.2354	11.0454	10.8791	11.0986	10.7802	10.7968	10.4755	11.0886	10.866	10.8058	11.292	11.2755	10.5328
Rps19	ENSMUSG00000040952	ENSMUSG00000040952	0.0370207	0.989374	0.118595	0.995681	0.0997927	0.940957	0.13502	0.980471		11.6832	11.7321	11.2758	11.3728	11.4741	11.4759	11.3654	11.592	11.4639	11.5406	11.2945	11.5255	11.4511	11.8434	11.261
Tpm1	ENSMUSG00000032366	ENSMUSG00000032366	-0.295926	0.587518	-0.208662	0.913272	-0.258261	0.631902	0.0700044	0.990293		11.0166	10.785	11.0126	10.8639	10.8111	10.9404	11.0802	11.0586	11.4315	11.2015	11.1628	11.0863	10.8988	11.3142	11.4467
Eif5a	ENSMUSG00000078812	ENSMUSG00000078812	0.0133008	0.995885	0.142797	0.995681	0.189174	0.956453	-0.00528638	0.998729		9.66348	9.91037	10.8091	10.2011	10.0846	10.3678	10.4702	10.0424	9.36743	10.2277	10.005	9.97921	10.6126	9.69467	10.1601
Cpe	ENSMUSG00000037852	ENSMUSG00000037852	-0.123915	0.903543	-0.234083	0.843531	-0.17618	0.824172	-0.144358	0.967914		10.9478	10.7163	10.8223	11.0177	10.9225	10.985	10.881	10.946	11.1787	10.8535	11.0748	11.2407	10.6477	11.1261	11.0485
Srrm2	ENSMUSG00000039218	ENSMUSG00000039218	-0.0772522	0.934799	-0.061698	0.995681	-0.105909	0.902042	0.0431534	0.991778		11.7871	11.7758	11.4	11.6322	11.5244	11.6982	11.7517	11.752	11.8027	11.8016	11.7937	11.5681	11.7072	11.763	11.7504
Rpl31	ENSMUSG00000073702	ENSMUSG00000073702	-0.14187	0.855324	0.0268631	0.995681	-0.0900347	0.936562	0.0970078	0.98795		11.4891	11.4352	11.2326	11.2829	11.234	11.3557	11.4933	11.5467	11.391	11.4627	11.3067	11.3105	11.4373	11.7831	11.3298
B2m	ENSMUSG00000060802	ENSMUSG00000060802	0.211544	0.753264	-0.0237377	0.995681	0.200389	0.754906	0.0229974	0.993307		10.7904	10.6934	10.9375	10.8057	10.8344	10.7242	10.5941	10.6237	10.6179	10.6558	10.8573	10.9747	10.4991	10.3465	10.9005
Mir703	ENSMUSG00000105814	ENSMUSG00000105814	0.0225466	0.995885	0.132797	0.995681	0.20338	0.968817	-0.183063	0.992218		8.96748	9.36458	10.5778	10.0336	9.8822	10.0521	9.99709	9.67883	8.95759	9.7981	9.38393	9.80903	10.4541	8.7661	9.66415
Slc25a3	ENSMUSG00000061904	ENSMUSG00000061904	0.0438166	0.979617	-0.0730431	0.995681	0.0965712	0.93969	-0.192242	0.95908		10.4709	10.6584	10.8795	10.9289	10.8014	10.8862	10.6621	10.6553	10.4259	10.7385	10.823	10.6996	10.9166	10.4698	10.4802
Rps9	ENSMUSG00000006333	ENSMUSG00000006333	-0.319564	0.716729	-0.0782039	0.995681	-0.266068	0.782161	-0.131789	0.98912		10.1816	10.1744	10.7725	10.5674	10.4936	10.5539	11.0508	10.6039	10.251	10.5056	10.3305	10.6059	10.9479	10.5509	10.649
Pkm	ENSMUSG00000032294	ENSMUSG00000032294	-0.0754159	0.961849	0.267137	0.82826	0.00954683	0.994893	0.180444	0.967914		11.8531	11.8144	11.3379	11.4675	11.5084	11.5391	11.7563	11.8084	11.4353	11.6536	11.3531	11.2146	11.7178	11.9522	11.5881
Hnrnpk	ENSMUSG00000021546	ENSMUSG00000021546	-0.0129577	0.995885	-0.0629834	0.995681	0.0196171	0.989147	-0.173997	0.967914		10.1434	10.2948	10.8646	10.6792	10.6293	10.6295	10.5111	10.5721	10.2572	10.5313	10.5149	10.56	10.7347	10.2914	10.3925
Slc3a2	ENSMUSG00000010095	ENSMUSG00000010095	0.296484	0.804828	0.0666049	0.995681	0.333988	0.70856	0.0700486	0.992218		9.88591	9.87827	10.7782	10.2215	10.1286	10.1886	10.0399	9.73896	9.95634	10.0949	10.2667	10.1842	10.3135	9.53682	9.90923
Gm29228	ENSMUSG00000101682	ENSMUSG00000101682	-0.16988	0.885852	0.0343604	0.995681	-0.083975	0.959191	-0.12365	0.98912		11.2502	11.4003	10.9546	11.2798	11.3118	11.4125	11.2843	11.5096	11.0592	11.3716	11.1327	11.006	11.524	11.5851	10.9565
Chchd2	ENSMUSG00000070493	ENSMUSG00000070493	-0.216156	0.836523	-0.256033	0.910048	-0.215322	0.829412	0.0794894	0.990293		10.9407	10.6054	10.4913	10.5731	10.5698	10.6884	10.6841	11.0242	10.9851	10.7463	10.8486	11.2018	10.5446	11.2358	10.855
Rps27a	ENSMUSG00000020460	ENSMUSG00000020460	-0.348281	0.900548	-0.0364318	0.995681	-0.150541	0.975621	-0.0415028	0.993307		9.43531	9.2994	10.6328	9.98142	9.78085	10.1144	10.4992	9.90871	9.68807	9.99296	9.63208	10.1995	10.4234	9.72826	10.537
Ctsl	ENSMUSG00000021477	ENSMUSG00000021477	0.395621	0.649881	-0.0176814	0.995681	0.388452	0.592646	0.00150104	0.998797		9.83888	10.0911	10.7026	10.3259	10.3184	10.1254	9.97303	9.73549	9.90369	10.2599	10.2775	10.2987	10.1363	9.29602	10.0335
Cxcl12	ENSMUSG00000061353	ENSMUSG00000061353	-0.153506	0.901419	-0.257495	0.896556	-0.27832	0.69212	-0.384307	0.67708		10.3572	10.2199	10.3443	10.8143	10.7341	10.5093	10.5679	10.3955	10.771	10.2871	10.3	10.9896	10.414	10.353	10.6066
Sod1	ENSMUSG00000022982	ENSMUSG00000022982	-0.00281586	0.998731	-0.014985	0.995681	-0.0261474	0.988899	0.215154	0.95908		11.3656	11.239	10.8752	10.9583	10.9662	10.9497	11.0006	11.331	11.2455	11.1455	11.03	11.3666	10.9566	11.4663	11.0514
Actn1	ENSMUSG00000015143	ENSMUSG00000015143	0.157437	0.776391	0.0303988	0.995681	0.0990148	0.898394	-0.0347597	0.992218		11.0157	10.9867	11.0242	11.0639	11.0335	11.0334	10.818	10.9279	10.9806	10.8315	11.0884	11.0044	10.9982	10.6758	10.8642
Ran	ENSMUSG00000029430	ENSMUSG00000029430	-0.124817	0.951761	-0.0369263	0.995681	-0.0509777	0.988797	-0.156031	0.98912		9.81919	9.89641	10.749	10.382	10.2911	10.4589	10.4953	10.39	9.86047	10.3316	10.0837	10.3501	10.5897	9.97485	10.4121
Myl6	ENSMUSG00000090841	ENSMUSG00000090841	-0.431855	0.550163	-0.164259	0.995681	-0.37741	0.598896	-0.214866	0.967914		10.0204	10.0946	10.568	10.4509	10.3147	10.6149	11.0703	10.4441	10.231	10.34	10.1358	10.7083	10.5776	10.7064	10.7556
Ybx1	ENSMUSG00000028639	ENSMUSG00000028639	-0.103641	0.85565	-0.0145847	0.995681	-0.120712	0.796912	0.0422126	0.990293		11.1186	11.2516	11.2176	11.1695	11.1282	11.1676	11.3184	11.2783	11.3563	11.2476	11.3036	11.077	11.2506	11.2721	11.3775
Rps16	ENSMUSG00000037563	ENSMUSG00000037563	-0.133576	0.984235	0.0642081	0.995681	-0.121665	0.986915	-0.00154141	0.999042		8.95149	9.07348	10.5234	9.66794	9.72829	9.73121	10.4093	9.54654	9.2778	9.71246	9.37185	9.81152	10.2436	8.94244	10.032
Spp1	ENSMUSG00000029304	ENSMUSG00000029304	-0.171857	0.915114	-0.498011	0.567091	-0.280963	0.804126	-0.507538	0.604399		9.93959	10.0137	10.2542	10.5241	10.6903	10.5281	10.2358	10.1176	10.6596	10.3053	10.5295	10.8349	10.448	9.53492	10.5609
Rpl27	ENSMUSG00000063316	ENSMUSG00000063316	0.114616	0.894787	0.0143294	0.995681	0.0956007	0.917466	-0.0379299	0.992218		10.65	10.8203	10.9466	10.8896	10.8455	10.8148	10.663	10.8231	10.6596	10.8615	10.7832	10.7485	10.9298	10.5527	10.5804
Gnai2	ENSMUSG00000032562	ENSMUSG00000032562	-0.113733	0.879839	-0.0241233	0.995681	-0.120286	0.850361	-0.11103	0.967914		11.3527	11.3703	11.0568	11.3649	11.3075	11.4509	11.3335	11.4658	11.3516	11.257	11.2556	11.3513	11.2943	11.5262	11.3017
Pcolce	ENSMUSG00000029718	ENSMUSG00000029718	-0.0592896	0.956106	-0.0491927	0.995681	-0.0904771	0.916943	0.0027445	0.997989		11.3873	11.3587	11.045	11.2921	11.2031	11.3026	11.3246	11.3701	11.3842	11.2783	11.3136	11.3624	11.3678	11.4498	11.1515
Rps18	ENSMUSG00000008668	ENSMUSG00000008668	-0.260016	0.721829	-0.207523	0.938299	-0.180896	0.840213	-0.257829	0.884634		10.2664	10.3054	10.7079	10.6785	10.644	10.7768	10.8463	10.6124	10.3745	10.7074	10.43	10.7895	10.9144	10.5272	10.6392
Cst3	ENSMUSG00000027447	ENSMUSG00000027447	0.129537	0.965879	0.0424015	0.995681	-0.0219677	0.994893	-0.156569	0.990293		10.2054	9.93203	10.7298	10.4128	10.4133	10.6198	10.4763	10.2055	10.3585	10.2967	10.2721	10.2916	10.5021	9.28928	10.5051
Zbtb20	ENSMUSG00000022708	ENSMUSG00000022708	-0.109382	0.943027	-0.290102	0.82826	-0.156748	0.903055	-0.22252	0.964166		10.5646	10.2406	10.5078	10.7329	10.6664	10.5971	10.4853	10.3001	10.9412	10.5716	10.6544	10.9478	10.2703	10.5584	10.7878
Snhg9	ENSMUSG00000090101	ENSMUSG00000090101	0.117176	0.929329	-0.0595201	0.995681	-0.0315629	0.988899	-0.105499	0.990293		11.0869	11.1214	10.8742	11.1256	11.2674	11.0031	10.8855	11.2518	11.0255	11.2242	11.3073	10.658	10.8793	11.1349	10.692
Il1rl1	ENSMUSG00000026069	ENSMUSG00000026069	-0.100465	0.984321	-0.465589	0.957479	0.000512826	0.999984	0.0888226	0.992218		9.32793	9.44075	10.4682	9.60603	9.7246	9.92052	9.72787	9.78331	10.0057	10.3063	10.6544	9.85561	9.55514	9.56312	10.4998
Cox6c	ENSMUSG00000014313	ENSMUSG00000014313	-0.178649	0.753981	-0.141516	0.96614	-0.0788814	0.93969	-0.143817	0.966979		10.8105	10.7947	10.7901	10.9467	10.9639	10.9144	10.9879	10.9765	10.6398	10.9217	10.8631	11.0281	11.0231	11.1013	10.786
Psmb4	ENSMUSG00000005779	ENSMUSG00000005779	-0.343763	0.37823	-0.157733	0.987248	-0.279564	0.560455	-0.182754	0.964166		10.3389	10.3515	10.7742	10.6705	10.6382	10.7547	11.0048	10.7951	10.5132	10.7385	10.543	10.7016	10.8943	10.8345	10.8174
Mt2	ENSMUSG00000031762	ENSMUSG00000031762	0.0794752	0.945168	-0.0423473	0.995681	0.0587927	0.965614	0.101739	0.98795		11.086	10.9763	10.9571	10.9395	10.7873	10.982	10.7563	11.119	10.9473	10.9594	11.2572	10.907	10.8921	11.0709	10.807
Col4a1	ENSMUSG00000031502	ENSMUSG00000031502	-0.095743	0.943027	-0.209089	0.921832	-0.202961	0.790135	-0.164926	0.967914		10.4737	10.3761	10.5442	10.5753	10.6548	10.664	10.6736	10.5673	10.7614	10.3687	10.5617	11.0157	10.4713	10.4427	10.7538
Cltc	ENSMUSG00000047126	ENSMUSG00000047126	-0.0575535	0.977398	-0.0769607	0.995681	0.0466782	0.985028	-0.145497	0.980674		10.047	10.0823	10.6189	10.4423	10.4144	10.4113	10.3665	10.2499	10.0604	10.2914	10.227	10.5264	10.6397	10.1745	10.134
Mtdh	ENSMUSG00000022255	ENSMUSG00000022255	-0.0977372	0.879839	-0.126305	0.92692	-0.00060983	0.999106	0.0290774	0.992218		10.867	10.8266	10.9456	10.7559	10.9079	10.8927	10.8649	10.8297	10.9504	11.0267	11.0736	10.9204	11.0238	11.0317	10.8767
Fau	ENSMUSG00000038274	ENSMUSG00000038274	-0.270482	0.741211	-0.0802691	0.995681	-0.182552	0.857733	0.0198701	0.993307		10.0432	10.0357	10.6322	10.2974	10.0846	10.3514	10.6962	10.4746	10.1254	10.3211	10.2022	10.5065	10.4971	10.5677	10.5505
Brd2	ENSMUSG00000024335	ENSMUSG00000024335	0.0111121	0.995775	0.156522	0.934985	0.125288	0.857733	0.303263	0.464969		11.0367	10.9572	10.9646	10.7368	10.6303	10.6809	10.8525	10.9874	10.7324	10.8951	10.7648	10.8275	10.733	11.1744	10.9845
Ndufa2	ENSMUSG00000014294	ENSMUSG00000014294	-0.239599	0.714279	0.000445103	0.999777	-0.222541	0.708504	0.0742871	0.990293		11.2729	11.2986	10.7708	11.0767	11.0631	11.0312	11.2912	11.3961	11.3712	11.1738	11.0255	11.1875	11.1407	11.5861	11.3503
Tagln2	ENSMUSG00000026547	ENSMUSG00000026547	-0.00583979	0.995885	0.0450005	0.995681	-0.01301	0.989792	0.0358995	0.992218		11.3542	11.5267	11.1301	11.3138	11.3477	11.2631	11.2136	11.4741	11.3729	11.3584	11.3905	11.1378	11.2288	11.4831	11.3274
Stc1	ENSMUSG00000014813	ENSMUSG00000014813	-0.014866	0.995456	0.114276	0.995681	0.0546154	0.976999	-0.0477331	0.992218		11.1885	11.3811	10.9395	11.1889	11.2196	11.2718	11.1058	11.2908	10.9588	11.1527	11.0313	11.0082	11.3335	11.3291	10.8725
Pomp	ENSMUSG00000029649	ENSMUSG00000029649	-0.129836	0.915114	-0.212961	0.938299	0.00401214	0.999106	0.0497996	0.992218		10.3723	10.3818	10.3641	10.3335	10.2544	10.3782	10.3501	10.5387	10.1967	10.4633	10.3756	10.8657	10.4683	10.8073	10.156
Rbm39	ENSMUSG00000027620	ENSMUSG00000027620	-0.0326872	0.991075	0.112128	0.995681	0.0387443	0.985028	0.136728	0.97139		11.4463	11.3624	10.9996	11.146	11.1268	11.1582	11.0474	11.2919	11.3666	11.1912	11.1171	11.1952	11.17	11.5648	11.1658
Rpl32	ENSMUSG00000057841	ENSMUSG00000057841	-0.110491	0.975266	0.0796119	0.995681	-0.170369	0.952038	-0.104467	0.992218		9.4778	9.55432	10.5288	10.0231	10.0407	10.0694	10.4135	10.048	9.80245	9.9663	9.59617	9.98804	10.2977	9.59077	10.1696
Son	ENSMUSG00000022961	ENSMUSG00000022961	-0.0630081	0.951761	-0.190398	0.824104	-0.0145095	0.989047	-0.0150468	0.993307		10.4751	10.572	10.6069	10.5903	10.5055	10.607	10.5248	10.4756	10.6946	10.6348	10.6486	10.9256	10.5711	10.6025	10.674
Rpl7a-ps8	ENSMUSG00000070778	ENSMUSG00000070778	-0.306767	0.701878	-0.0376515	0.995681	-0.268092	0.721763	-0.176966	0.967914		10.4597	10.582	10.5824	10.6351	10.6903	10.8266	10.9907	10.9882	10.3665	10.8491	10.3976	10.4517	10.9758	11.0018	10.519
Npm1	ENSMUSG00000057113	ENSMUSG00000057113	-0.0424843	0.965879	-0.0701041	0.995681	0.059775	0.95122	0.12301	0.967914		10.7609	10.7979	10.9025	10.6576	10.7793	10.6621	10.7321	10.7775	10.7804	11.0098	10.9216	10.7361	10.7111	10.9501	10.924
Cox7a2	ENSMUSG00000032330	ENSMUSG00000032330	-0.146313	0.721829	-0.107643	0.961861	-0.1681	0.588666	-0.0294575	0.992218		10.9069	10.8853	10.8656	10.9272	10.8438	10.9705	10.9737	11.0627	11.1202	11.044	10.9705	10.9635	10.9422	11.1172	11.03
Pbx1	ENSMUSG00000052534	ENSMUSG00000052534	-0.172603	0.868287	-0.255903	0.868545	-0.377454	0.380772	-0.304323	0.772935		10.677	10.4693	10.3504	10.8474	10.8344	10.7377	10.7388	10.7242	11.139	10.5751	10.8802	10.8046	10.4622	10.4934	11.0066
Ccnd2	ENSMUSG00000000184	ENSMUSG00000000184	-0.0226932	0.992047	0.0642691	0.995681	-0.0900157	0.944146	0.0537491	0.992036		11.7949	11.7823	11.2003	11.5169	11.5143	11.6517	11.5446	11.7098	11.8476	11.5794	11.6351	11.434	11.5451	11.7368	11.6276
Axl	ENSMUSG00000002602	ENSMUSG00000002602	-0.101826	0.894787	0.103545	0.993883	-0.0810816	0.926954	0.00219706	0.998729		11.2379	11.3256	11.114	11.1421	11.2078	11.3207	11.3627	11.3773	11.1754	11.1627	11.2257	10.9725	11.3368	11.3838	11.2629
Pura	ENSMUSG00000043991	ENSMUSG00000043991	-0.0167669	0.993753	-0.236	0.849265	0.0221751	0.988899	0.0747965	0.990293		10.6414	10.5568	10.3	10.4056	10.486	10.3965	10.293	10.5277	10.6082	10.6365	10.5741	10.9741	10.3576	10.734	10.4438
Cox4i1	ENSMUSG00000031818	ENSMUSG00000031818	0.0339184	0.968596	0.19657	0.580885	-0.0621518	0.937415	0.0925065	0.967914		11.1443	11.1494	11.0596	10.9991	11.0033	11.0717	11.2003	11.1662	11.1708	10.8859	10.9897	10.8854	11.1842	11.0735	10.9845
Emp1	ENSMUSG00000030208	ENSMUSG00000030208	0.625752	0.174627	0.2652	0.949518	0.511625	0.35336	0.37507	0.823082		9.55125	9.66666	10.4654	9.43773	9.65057	9.66089	9.59139	9.52661	9.20288	9.72365	9.60308	9.75445	9.61267	8.951	9.3711
H3f3b	ENSMUSG00000016559	ENSMUSG00000016559	0.227756	0.721829	0.167395	0.970791	0.195022	0.781624	0.0749175	0.990293		10.2171	10.2263	10.665	10.2799	10.2936	10.3689	10.2792	10.2414	10.0534	10.286	10.0713	10.2978	10.3235	10.0176	10.1284
Rpl39	ENSMUSG00000079641	ENSMUSG00000079641	0.188189	0.914149	0.0732525	0.995681	0.120671	0.956453	-0.0384222	0.993307		9.59823	9.73099	10.4491	9.94854	9.99542	10.1075	10.029	9.75618	9.77857	9.8206	9.8113	10.0735	10.2079	9.07627	9.87477
Mat2a	ENSMUSG00000053907	ENSMUSG00000053907	0.00119504	0.99911	0.00627285	0.995681	0.0204441	0.988899	0.0718678	0.990293		10.3961	10.785	10.8207	10.5039	10.6846	10.6363	10.7522	10.6789	10.5439	10.7964	10.7718	10.4308	10.7595	10.7578	10.5083
Rpl38	ENSMUSG00000057322	ENSMUSG00000057322	0.0878417	0.900548	0.122496	0.949518	0.0408735	0.968258	0.0392133	0.990404		10.7711	10.8454	10.8763	10.7786	10.7258	10.8724	10.7194	10.7665	10.8848	10.6474	10.7855	10.6949	10.8595	10.7257	10.6402
Lgals3	ENSMUSG00000050335	ENSMUSG00000050335	0.141434	0.879839	0.278862	0.703855	0.192555	0.782947	0.255373	0.789972		11.3754	11.5688	11.1434	11.0386	11.14	11.1689	11.2529	11.2908	10.9739	11.2848	11.0642	10.9065	11.2412	11.3653	11.0689
Tuba1a	ENSMUSG00000072235	ENSMUSG00000072235	-0.25417	0.671206	-0.19504	0.921832	-0.18125	0.800611	-0.181764	0.964166		10.185	10.1711	10.4043	10.4649	10.3523	10.5008	10.5002	10.5287	10.2792	10.3441	10.2292	10.7361	10.6062	10.4141	10.5126
Cbx6	ENSMUSG00000089715	ENSMUSG00000089715	0.118075	0.926242	0.194087	0.96864	0.139383	0.909275	0.069634	0.990293		11.5581	11.4373	10.9227	11.2798	11.275	11.2239	11.0207	11.3148	11.2198	11.2208	11.1733	11.0044	11.2909	11.4022	10.8924
Nucks1	ENSMUSG00000026434	ENSMUSG00000026434	0.0192202	0.993093	0.157235	0.993883	0.0426969	0.985028	0.216508	0.95908		11.909	11.7549	11.2478	11.3236	11.5376	11.4694	11.4103	11.7855	11.6385	11.6325	11.5	11.3717	11.5938	11.81	11.508
Rpl9	ENSMUSG00000047215	ENSMUSG00000047215	0.172807	0.891751	0.0857545	0.995681	0.222294	0.820391	-0.0229204	0.993307		9.96569	10.0946	10.4961	10.2451	10.2115	10.2314	10.1838	10.0661	9.65285	10.135	10.0154	10.2062	10.3662	9.86287	9.80502
Hdgf	ENSMUSG00000004897	ENSMUSG00000004897	0.254458	0.505332	0.107052	0.993883	0.331205	0.169326	0.153012	0.95908		10.454	10.4679	10.6496	10.3284	10.4751	10.3217	10.2358	10.2812	10.0703	10.301	10.4329	10.5226	10.4202	10.233	10.1588
Sox4	ENSMUSG00000076431	ENSMUSG00000076431	-0.351983	0.267037	-0.488596	0.0450479	-0.40072	0.124079	-0.220217	0.871033		10.2104	10.1102	10.1433	10.4359	10.3048	10.3782	10.4125	10.5857	10.6549	10.5565	10.5785	10.7794	10.2703	10.4488	10.7574
Atp5b	ENSMUSG00000025393	ENSMUSG00000025393	0.0610526	0.980152	0.0454796	0.995681	0.0543516	0.985028	-0.0337168	0.993307		9.68298	9.81607	10.4668	10.0819	10.0076	10.1144	10.196	9.97786	9.73136	10.0563	9.80382	10.092	10.2921	9.60891	9.94131
Pdpn	ENSMUSG00000028583	ENSMUSG00000028583	-0.251206	0.801487	-0.513626	0.298779	-0.242553	0.788968	0.000644219	0.999042		10.242	10.2311	10.044	10.1862	10.1118	10.2199	10.1104	10.5847	10.5091	10.7138	10.8508	10.4692	9.91811	10.7073	10.5349
Fam120a	ENSMUSG00000038014	ENSMUSG00000038014	0.209287	0.833288	0.166124	0.993883	0.270689	0.69212	-0.0377823	0.992676		10.3188	10.496	10.5281	10.4948	10.4292	10.5406	10.1726	10.4259	9.89737	10.2978	10.237	10.3207	10.609	10.1362	9.88635
Sumo3	ENSMUSG00000020265	ENSMUSG00000020265	0.0339217	0.991488	0.0204891	0.995681	-0.0109663	0.994893	0.069036	0.990293		11.3648	11.2695	10.7097	11.0292	11.1531	11.0283	11.0187	11.2549	11.1702	11.0793	11.1516	11.1273	11.0689	11.4016	10.7807
Npc2	ENSMUSG00000021242	ENSMUSG00000021242	0.0742368	0.93164	0.0973367	0.995681	0.0107278	0.989792	0.0645567	0.990293		11.3969	11.347	11.0441	11.178	11.1504	11.2805	11.213	11.2347	11.323	11.1119	11.2122	11.1875	11.0906	11.2624	11.2243
Igfbp4	ENSMUSG00000017493	ENSMUSG00000017493	-0.206463	0.860904	-0.198296	0.993883	-0.267619	0.759824	-0.634219	0.0963696		9.97165	10.0303	9.81448	10.5616	10.6303	10.524	10.2664	10.0112	10.3247	9.75669	10.1203	10.4517	10.4833	9.71993	10.1354
Ywhab	ENSMUSG00000018326	ENSMUSG00000018326	-0.065399	0.935072	0.0452538	0.995681	-0.0683754	0.9396	0.0144096	0.993307		11.1791	11.0902	10.9257	11.0071	11.0674	11.0817	11.1291	11.1506	11.1242	11	10.991	11.0708	11.0808	11.2653	11.0381
Calu	ENSMUSG00000029767	ENSMUSG00000029767	-0.0989655	0.961864	-0.125495	0.995681	-0.0231906	0.989428	-0.160528	0.98912		9.79251	9.59933	10.2873	10.1461	10.1314	9.9734	10.3891	9.73375	9.59347	10.0087	9.82318	10.2826	10.2187	9.68444	10.1173
Snrpd1	ENSMUSG00000002477	ENSMUSG00000002477	-0.0723145	0.956297	-0.23928	0.827087	-0.0732866	0.956453	-0.0135092	0.993307		9.91093	9.9044	10.432	10.215	10.1356	10.0111	10.0669	10.2279	10.2485	10.2978	10.3032	10.4397	10.2055	10.1781	10.1629
Ptp4a2	ENSMUSG00000028788	ENSMUSG00000028788	-0.161198	0.701878	-0.0210045	0.995681	-0.148206	0.695749	-0.0248077	0.992218		10.8325	10.9649	10.8763	10.8521	10.9576	10.9404	11.0569	11.0572	11.0051	11.0138	10.8916	10.8287	11.0031	11.1535	10.996
Cd44	ENSMUSG00000005087	ENSMUSG00000005087	0.670624	0.671206	0.165404	0.995681	0.484992	0.796821	0.436176	0.967914		8.91897	9.12569	10.2801	9.16559	9.1028	9.16041	9.2884	8.89774	9.07147	9.50213	9.4563	9.26833	9.07693	8.25535	9.22502
Dio2	ENSMUSG00000007682	ENSMUSG00000007682	-0.44064	0.587518	-0.861627	0.0200937	-0.503444	0.376131	-0.319611	0.93064		9.72826	9.22476	9.16149	9.85227	9.67758	9.58497	9.78751	9.89323	9.99089	9.95955	10.1999	10.5309	9.1861	10.1173	10.02
Pabpc4	ENSMUSG00000011257	ENSMUSG00000011257	0.209064	0.835614	0.0487235	0.995681	0.361036	0.465091	0.115813	0.98912		10.1059	10.2279	10.4065	10.1548	10.1439	10.1158	9.8572	10.088	9.71168	10.0937	10.1394	10.3663	10.4399	9.82922	9.76616
Rpl35a-ps5	ENSMUSG00000093885	ENSMUSG00000093885	-0.383504	0.835614	-0.019614	0.995681	-0.211454	0.93969	-0.285345	0.977376		9.29663	9.67603	10.1926	10.1109	9.90687	10.1364	10.3687	10.0055	9.41468	10.032	9.51425	9.77882	10.5216	10.0176	9.82751
Rps19-ps4	ENSMUSG00000096699	ENSMUSG00000096699	0.0727431	0.965879	0.185924	0.993883	0.176855	0.881089	0.119884	0.98912		11.0555	11.1561	10.6936	10.8057	10.8421	10.9318	10.7472	11.0404	10.5868	10.941	10.7602	10.6704	11.0642	11.1554	10.3878
Tceal9	ENSMUSG00000042712	ENSMUSG00000042712	-0.0518236	0.96434	-0.221639	0.767027	-0.0903749	0.926954	-0.0687678	0.990293		10.7023	10.6261	10.5436	10.6984	10.7569	10.6198	10.5345	10.6553	10.9257	10.7895	10.9671	10.7717	10.5608	10.6954	10.7646
Myl9	ENSMUSG00000067818	ENSMUSG00000067818	-0.610686	0.701878	-0.30376	0.995681	-0.66036	0.590697	-0.377841	0.967914		9.95571	9.78611	8.89281	9.99652	9.89376	10.0694	9.9716	10.2584	10.5266	9.42002	9.75503	10.3939	9.75627	10.6766	10.0731
Eif3a	ENSMUSG00000024991	ENSMUSG00000024991	0.0139716	0.994696	-0.156034	0.956382	0.0304326	0.988751	0.234253	0.78039		10.7201	10.6346	10.505	10.42	10.4075	10.3325	10.4963	10.4994	10.7605	10.7432	10.8391	10.7459	10.363	10.8229	10.5986
Saa3	ENSMUSG00000040026	ENSMUSG00000040026	-0.751052	0.145709	-0.783192	0.144129	-0.844333	0.0603667	-0.808509	0.128416		8.69239	8.68074	9.50488	10.0072	9.81774	9.61855	9.95002	9.5564	10.029	9.45112	9.41959	10.3277	9.74967	9.92792	9.60331
Atp5k	ENSMUSG00000050856	ENSMUSG00000050856	-0.222104	0.771803	-0.0605125	0.995681	-0.200468	0.794594	0.192941	0.964166		10.8776	10.9084	10.4218	10.581	10.5375	10.5529	10.8275	10.9385	11.0732	10.8241	10.7447	10.8591	10.7178	11.2509	10.8932
Rpl13	ENSMUSG00000000740	ENSMUSG00000000740	0.1582	0.856605	0.00940339	0.995681	0.151559	0.84798	0.184711	0.95908		10.9346	10.815	10.5895	10.581	10.577	10.643	10.36	10.8626	10.6351	10.6691	10.7525	10.8948	10.5608	10.7931	10.5105
Oaf	ENSMUSG00000032014	ENSMUSG00000032014	0.465088	0.830667	0.215192	0.995681	0.50911	0.782161	0.308504	0.982436		8.96748	8.94376	10.2287	9.26687	9.16956	9.19225	9.20337	9.06182	8.72749	9.3822	9.10853	9.39987	9.54183	8.59095	8.85925
Hnrnpa0	ENSMUSG00000007836	ENSMUSG00000007836	0.0129027	0.995821	0.0353049	0.995681	0.0418567	0.985028	-0.129366	0.9781		10.268	10.2374	10.5023	10.5271	10.5088	10.3747	10.3391	10.4547	10.0857	10.389	10.2807	10.2509	10.5952	10.2318	10.1187
Cstb	ENSMUSG00000005054	ENSMUSG00000005054	0.299962	0.915114	0.201855	0.995681	0.311351	0.915919	-0.0988448	0.992218		9.22195	9.15278	10.2395	9.67332	9.66991	9.83906	9.53837	9.44826	8.89867	9.42199	9.36374	9.50203	9.82854	8.45713	9.39677
Aebp1	ENSMUSG00000020473	ENSMUSG00000020473	-0.115365	0.948833	-0.23362	0.958659	-0.261483	0.783347	0.0623649	0.992218		10.5394	10.2374	10.1573	10.2657	10.1536	10.3467	10.3346	10.4462	10.8975	10.301	10.6327	10.6936	9.94437	10.5471	10.707
P4hb	ENSMUSG00000025130	ENSMUSG00000025130	-0.0297799	0.991157	-0.110747	0.995681	-0.0997712	0.929746	-0.273086	0.746342		10.2599	10.3174	10.4584	10.5558	10.6606	10.6478	10.5575	10.4558	10.3235	10.4595	10.4378	10.4817	10.6749	10.1412	10.2652
Canx	ENSMUSG00000020368	ENSMUSG00000020368	-0.159983	0.865796	0.0497998	0.995681	-0.129497	0.908644	0.0769009	0.990293		11.1601	11.181	10.7444	10.8976	10.9717	11.0187	11.2003	11.1796	11.1269	11.1342	10.9638	10.8603	10.9465	11.4978	11.097
Cox8a	ENSMUSG00000035885	ENSMUSG00000035885	-0.324256	0.721829	-0.0559259	0.995681	-0.214762	0.84798	-0.131071	0.98912		9.53257	9.56192	10.332	10.0273	9.91338	10.0391	10.4093	9.86176	9.8942	9.85298	9.79027	10.0961	10.2424	10.0257	10.2804
Ssrp1	ENSMUSG00000027067	ENSMUSG00000027067	0.0112172	0.995127	-0.00576548	0.995681	0.0725651	0.93969	0.0026891	0.997989		10.7011	10.7231	10.7055	10.663	10.6538	10.8011	10.6153	10.7049	10.5897	10.7471	10.7664	10.6308	10.771	10.8144	10.4879
Ier5	ENSMUSG00000056708	ENSMUSG00000056708	0.526091	0.246951	0.38581	0.687497	0.665781	0.0596313	0.429831	0.662709		9.70461	9.68534	10.3776	9.40093	9.64079	9.56078	9.25358	9.57204	9.02872	9.73948	9.59271	9.38991	9.58697	9.49059	9.2198
Cfl1	ENSMUSG00000056201	ENSMUSG00000056201	-0.106387	0.90469	-0.171436	0.922293	-0.136395	0.847455	-0.090954	0.98912		10.2761	10.2918	10.3489	10.4649	10.3208	10.4011	10.387	10.352	10.5789	10.2153	10.4937	10.6834	10.3335	10.4336	10.4682
Fkbp1a	ENSMUSG00000032966	ENSMUSG00000032966	-0.063589	0.951761	0.0817447	0.995681	-0.0820358	0.93541	-0.00806801	0.995065		11.1548	11.2151	10.9364	11.0557	11.1148	11.1676	11.2076	11.2187	11.133	11.1113	11.0872	10.8603	11.1613	11.2953	11.0366
Eef1g	ENSMUSG00000071644	ENSMUSG00000071644	-0.454049	0.581189	-0.0790398	0.995681	-0.278349	0.818174	-0.0925874	0.990293		9.5027	9.60914	10.1746	9.97491	9.74116	9.9394	10.5412	10.0536	9.41025	10.0474	9.68838	9.86882	10.2715	10.2388	10.2371
Rrbp1	ENSMUSG00000027422	ENSMUSG00000027422	-0.361494	0.270065	-0.33353	0.48919	-0.357277	0.262858	-0.184556	0.95908		10.7237	10.6201	10.2624	10.707	10.7971	10.6818	10.9266	10.7277	11.0342	10.8665	10.9871	10.773	10.7271	10.9894	10.986
Psma7	ENSMUSG00000027566	ENSMUSG00000027566	-0.100368	0.894787	-0.0109882	0.995681	-0.0441068	0.968258	-0.0389272	0.992218		10.5919	10.6702	10.6638	10.6177	10.6538	10.7706	10.7091	10.7943	10.5459	10.6415	10.6743	10.6455	10.8572	10.7939	10.5599
Ywhag	ENSMUSG00000051391	ENSMUSG00000051391	0.140297	0.862739	0.29253	0.570432	0.145372	0.840213	0.12522	0.971075		10.7937	11.0044	10.7645	10.6971	10.7578	10.7422	10.7005	10.8902	10.5225	10.6691	10.4853	10.5362	10.6697	10.9133	10.5432
Gm50124	ENSMUSG00000118143	ENSMUSG00000118143	-0.353103	0.673657	-0.133462	0.995681	-0.219353	0.840213	-0.234861	0.966979		9.69983	10.0174	10.1918	10.2206	10.0672	10.3573	10.424	10.3497	9.74903	10.2176	10.0562	10.0776	10.6316	10.3797	9.91086
Rtn4	ENSMUSG00000020458	ENSMUSG00000020458	0.041624	0.988612	-0.0180367	0.995681	0.0723076	0.968258	0.0458231	0.992218		9.77671	9.59933	10.394	9.89891	9.93753	9.9394	10.0522	9.89323	9.73314	9.89741	10.0321	10.0325	9.89885	9.82146	10.0585
Rpl26	ENSMUSG00000060938	ENSMUSG00000060938	-0.273532	0.807196	-0.208481	0.993883	-0.379756	0.590365	0.196033	0.972015		10.1969	9.79473	9.91484	9.78308	9.61308	9.93471	10.0207	10.4725	10.5256	9.97836	10.1057	10.4333	9.73971	10.6169	10.264
Ddb1	ENSMUSG00000024740	ENSMUSG00000024740	0.00883987	0.995821	0.0212	0.995681	0.0756025	0.928318	-0.082751	0.982436		10.6709	10.6584	10.6328	10.6529	10.7442	10.8096	10.6936	10.6077	10.4193	10.6229	10.6028	10.6704	10.743	10.5732	10.6126
Egr1	ENSMUSG00000038418	ENSMUSG00000038418	0.671592	0.151758	0.58711	0.371731	0.754063	0.0686685	0.574166	0.440268		9.39154	9.22795	10.2271	9.00855	9.10564	9.23873	9.07364	8.94955	8.78683	9.17661	9.16565	8.97163	9.35002	8.69653	8.94716
Gm4332	ENSMUSG00000106037	ENSMUSG00000106037	-0.196261	0.842143	-0.00853003	0.995681	-0.132121	0.916943	-0.181295	0.967914		10.2583	10.4352	10.342	10.5167	10.4849	10.5802	10.5839	10.6451	10.1602	10.5654	10.1884	10.2862	10.7783	10.6205	10.1588
Hsp90b1	ENSMUSG00000020048	ENSMUSG00000020048	0.0693379	0.949441	-0.0517898	0.995681	0.0577246	0.95768	0.0354623	0.992218		10.6722	10.7037	10.585	10.5924	10.647	10.6149	10.4427	10.5257	10.7958	10.6888	10.7099	10.7163	10.7153	10.4017	10.6186
Rap1b	ENSMUSG00000052681	ENSMUSG00000052681	-0.00746137	0.995885	0.126592	0.995681	0.0899048	0.955089	0.0136467	0.994176		9.83453	9.93399	10.4255	10.0625	10.0318	10.1418	10.2203	10.0354	9.70808	10.0912	9.89249	9.90889	10.2282	10.1374	9.91732
Sgk1	ENSMUSG00000019970	ENSMUSG00000019970	0.602916	0.136438	0.322635	0.830597	0.438699	0.408615	0.446504	0.627634		9.68056	9.49733	10.3031	9.46434	9.44132	9.38366	9.32464	9.5246	9.45828	9.51506	9.83643	9.25193	9.33245	9.03928	9.42653
Ssr4	ENSMUSG00000002014	ENSMUSG00000002014	-0.572501	0.103377	-0.206718	0.97682	-0.384168	0.463009	-0.307049	0.850935		10.4709	10.3616	9.7707	10.4903	10.4585	10.6487	10.917	10.3999	10.4606	10.639	10.2381	10.3989	10.8032	10.8927	10.6958
Foxp1	ENSMUSG00000030067	ENSMUSG00000030067	0.00867886	0.995885	-0.124864	0.98619	-0.0891141	0.916943	-0.0518245	0.990293		10.2936	10.2406	10.4131	10.443	10.2936	10.3712	10.3413	10.4292	10.4531	10.3677	10.4589	10.5019	10.1004	10.4027	10.4098
Sox9	ENSMUSG00000000567	ENSMUSG00000000567	1.0515	0.234853	0.187006	0.995681	0.739126	0.561839	0.754347	0.746342		8.8857	8.94763	10.0145	8.66965	8.4563	8.7647	8.45505	8.66595	8.81058	9.20197	9.70453	8.41003	8.09541	8.27821	8.60672
Gnas	ENSMUSG00000027523	ENSMUSG00000027523	0.218504	0.856274	-0.0375162	0.995681	-0.0348649	0.988899	0.182297	0.974686		10.3265	10.3382	10.342	10.094	10.0288	10.3229	9.93104	10.2954	10.764	10.2511	10.5204	10.3346	9.88987	9.88687	10.4911
Top1	ENSMUSG00000070544	ENSMUSG00000070544	-0.034329	0.977453	-0.102973	0.993883	0.00727625	0.994893	-0.0195422	0.993307		10.3872	10.4421	10.5495	10.3654	10.5532	10.5261	10.3795	10.4819	10.5039	10.6424	10.5204	10.5324	10.557	10.5815	10.3405
Tpt1	ENSMUSG00000060126	ENSMUSG00000060126	-0.108988	0.981805	0.0138045	0.995681	-0.0461884	0.989047	0.0193327	0.995872		9.0067	8.92424	10.1058	9.48436	9.43455	9.38825	9.95146	9.22654	9.19259	9.5224	9.19338	9.58002	9.88083	8.91645	9.72253
Eif3k	ENSMUSG00000053565	ENSMUSG00000053565	-0.143892	0.897939	0.0940228	0.995681	-0.150805	0.888027	0.0730325	0.990293		11.3024	11.1957	10.7055	10.926	11.0132	11.102	11.2641	11.3689	11.0669	11.1819	10.9658	10.812	11.1669	11.4346	11.0682
Rps15a	ENSMUSG00000008683	ENSMUSG00000008683	0.132138	0.900548	0.193146	0.938299	0.246133	0.678885	-0.0180752	0.993307		10.1113	10.4227	10.4196	10.3199	10.3854	10.3277	10.1576	10.1362	9.93952	10.1693	10.065	10.1649	10.5089	10.1249	9.87809
Mdh2	ENSMUSG00000019179	ENSMUSG00000019179	0.117999	0.923226	0.157061	0.993883	0.0827427	0.956453	0.167849	0.967914		11.2543	11.2826	10.7742	10.9378	10.9434	10.9759	10.9192	11.172	11.0095	11.096	10.9976	10.7787	11.0135	11.2521	10.6845
Rpl3	ENSMUSG00000060036	ENSMUSG00000060036	-0.305391	0.639878	-0.30014	0.759896	-0.282518	0.634644	-0.119449	0.98912		9.5697	9.62616	10.196	9.99329	9.80029	10.0478	10.1336	10.0564	10.1496	10.0739	9.99322	10.3066	10.1133	10.0108	10.2741
Eif5	ENSMUSG00000021282	ENSMUSG00000021282	0.0305787	0.982765	0.0591812	0.995681	0.032233	0.985028	0.133623	0.966979		10.909	11.0601	10.7657	10.8021	10.7856	10.7547	10.9325	10.8595	10.8533	11.0105	10.8066	10.7361	10.9225	10.9075	10.8192
Cdkn2a	ENSMUSG00000044303	ENSMUSG00000044303	0.250864	0.828478	-0.15033	0.995681	0.0497585	0.986744	0.10316	0.990293		10.0507	9.61646	9.97643	9.90806	9.64862	9.80343	9.53451	10.1176	9.8226	9.6947	9.98001	10.373	9.40567	9.52731	9.94448
Cox6a1	ENSMUSG00000041697	ENSMUSG00000041697	-0.128728	0.836523	-0.0522851	0.995681	-0.087533	0.915628	-0.128776	0.966979		10.562	10.5782	10.4605	10.6778	10.6243	10.6809	10.6806	10.7004	10.4681	10.5583	10.5502	10.6441	10.8112	10.6025	10.5568
Rbms1	ENSMUSG00000026970	ENSMUSG00000026970	0.537893	0.339495	0.205437	0.993883	0.473374	0.44298	0.180668	0.982436		9.28072	9.49204	10.2053	9.54134	9.58685	9.49422	9.3795	9.26554	9.09099	9.62483	9.55223	9.36131	9.42652	8.68973	9.33775
Prrx2	ENSMUSG00000039476	ENSMUSG00000039476	-0.198137	0.894787	-0.179126	0.995681	-0.148874	0.93969	-0.41931	0.762857		9.09669	9.37612	10.025	10.092	10.0076	9.8137	10.0467	9.45038	9.5498	9.69795	9.70614	9.80404	10.0782	9.48471	9.63699
Rpl21	ENSMUSG00000041453	ENSMUSG00000041453	-0.173727	0.856605	-0.1923	0.949477	-0.247815	0.69212	0.108161	0.98912		9.96569	9.88232	10.0562	9.85582	9.86215	9.8722	10.1399	10.2365	10.2744	10.01	9.82614	10.5474	10.0755	10.1224	10.2306
Slc25a4	ENSMUSG00000031633	ENSMUSG00000031633	-0.117308	0.894787	-0.10818	0.995681	-0.120662	0.887918	-0.0324514	0.992218		9.93959	9.93594	10.3663	10.1139	10.1146	10.1714	10.2664	10.184	10.2121	10.1374	10.137	10.3406	10.2703	10.1437	10.2371
Klf9	ENSMUSG00000033863	ENSMUSG00000033863	0.0873756	0.960801	-0.09657	0.995681	-0.0459268	0.986683	-0.0533047	0.992218		9.60591	9.63819	10.2881	9.96617	9.89212	9.95495	10.0669	9.80167	9.91156	9.93639	10.1688	9.81773	9.82226	9.52731	10.0064
Prmt1	ENSMUSG00000109324	ENSMUSG00000109324	0.317129	0.634219	0.174726	0.993883	0.272796	0.678885	0.15694	0.974212		11.0243	11.235	10.6139	10.8258	10.8758	10.7609	10.3998	10.7724	10.9007	10.8499	10.9401	10.6016	10.7397	10.7545	10.4737
Rpl30	ENSMUSG00000058600	ENSMUSG00000058600	-0.0431935	0.991488	-0.0248755	0.995681	0.147334	0.937415	-0.14047	0.98912		9.49169	9.74886	10.1354	9.98575	10.0197	9.86892	9.82752	9.81158	9.32567	9.95142	9.69001	9.87953	10.3101	9.56869	9.57701
Eif3c	ENSMUSG00000030738	ENSMUSG00000030738	-0.208422	0.712766	-0.0128339	0.995681	-0.0716994	0.945255	-0.0116985	0.993307		10.6575	10.7566	10.5746	10.617	10.5821	10.8165	10.8961	10.6987	10.5936	10.8389	10.614	10.5623	10.8191	10.9845	10.8035
Cbx5	ENSMUSG00000009575	ENSMUSG00000009575	-0.059642	0.961849	0.00335457	0.996579	-0.0706839	0.95219	0.0360361	0.992218		11.1284	10.9687	10.6705	10.8947	10.9266	10.8667	10.8664	11.0474	11.0851	11.0202	10.9056	10.8561	10.9327	11.1585	10.8667
Lamp1	ENSMUSG00000031447	ENSMUSG00000031447	0.0324826	0.995885	0.10469	0.995681	0.0875939	0.988899	0.093717	0.993307		8.8899	8.57455	9.98431	9.09523	8.87502	9.52788	9.60065	9.07011	8.80721	9.04266	8.85725	9.55052	9.41613	8.30071	9.70021
Mtch1	ENSMUSG00000024012	ENSMUSG00000024012	-0.152409	0.915114	0.0860201	0.995681	-0.26572	0.780808	0.157964	0.982436		11.1496	10.8984	10.2599	10.5448	10.6884	10.7278	11.011	11.1177	11.1038	10.9217	10.608	10.6308	10.6662	11.2818	10.8783
Tpm2	ENSMUSG00000028464	ENSMUSG00000028464	-0.239966	0.595272	-0.0696091	0.995681	-0.277042	0.383873	-0.140503	0.967914		10.6952	10.4827	10.332	10.6501	10.6283	10.6659	10.9073	10.8034	10.6284	10.552	10.4834	10.6882	10.7085	10.8529	10.674
Hspa9	ENSMUSG00000024359	ENSMUSG00000024359	0.285051	0.664829	0.196007	0.942387	0.450054	0.154118	0.152607	0.967914		9.77217	10.0266	10.3435	9.85464	9.97223	9.92842	9.65858	9.66796	9.53766	9.92812	9.97336	9.71378	9.98429	9.53492	9.80677
Plec	ENSMUSG00000022565	ENSMUSG00000022565	-0.196666	0.733122	0.0304341	0.995681	-0.127149	0.867461	0.0166788	0.993307		11.1373	11.1636	10.8316	10.9294	11.0506	11.1146	11.2423	11.2149	11.0662	11.107	11.1315	10.7977	11.1725	11.3059	11.2565
Paics	ENSMUSG00000029247	ENSMUSG00000029247	0.127062	0.970432	-0.144948	0.995681	0.134328	0.969348	-0.0896643	0.992218		9.05614	8.98203	9.87193	9.52805	9.44582	9.38596	9.47529	9.22406	8.94844	9.44534	8.93049	9.96698	9.63613	8.8417	9.12524
Ifitm3	ENSMUSG00000025492	ENSMUSG00000025492	0.0139775	0.995885	0.0180323	0.995681	-0.0437615	0.988402	0.196487	0.967914		10.9578	10.9034	10.2121	10.6481	10.5216	10.409	10.5923	10.7639	10.9327	10.5698	10.7455	10.7983	10.4025	10.9465	10.7357
Lig1	ENSMUSG00000056394	ENSMUSG00000056394	0.0526506	0.984235	0.0845628	0.995681	0.0790755	0.968258	0.226823	0.967914		11.2842	11.1527	10.3754	10.8258	10.7605	10.6921	10.638	11.0149	11.0378	10.9203	10.9264	10.8603	10.7305	11.2004	10.8286
Atp5a1	ENSMUSG00000025428	ENSMUSG00000025428	-0.0707947	0.956761	0.00989343	0.995681	-0.0131328	0.989841	-0.106081	0.98912		9.97956	9.98387	10.3746	10.1843	10.2286	10.2914	10.3324	10.0012	10.0717	10.1493	10.0725	10.1354	10.3543	10.0324	10.1951
Dag1	ENSMUSG00000039952	ENSMUSG00000039952	-0.15219	0.904898	-0.0230682	0.995681	-0.120374	0.93969	-0.413617	0.621735		9.63122	9.88029	9.99117	10.2983	10.2532	10.2147	10.1065	10.115	9.61482	9.9636	9.71094	9.91353	10.377	9.79634	9.71884
Ube2d3	ENSMUSG00000078578	ENSMUSG00000078578	0.0816862	0.926955	0.204451	0.791212	0.113877	0.870977	0.0725009	0.989259		10.4239	10.5338	10.5555	10.4015	10.4383	10.4633	10.4019	10.5516	10.2044	10.3095	10.3064	10.2924	10.5225	10.4866	10.2499
Rpl18	ENSMUSG00000059070	ENSMUSG00000059070	-0.0947272	0.945168	-0.0602702	0.995681	0.0205995	0.989047	-0.0382264	0.992218		9.9537	9.88232	10.2354	10.0502	10.137	10.0303	10.2046	10.0382	9.76648	10.0676	9.94781	10.2518	10.3705	10.0788	9.89784
Tubb6	ENSMUSG00000001473	ENSMUSG00000001473	-0.0472161	0.976231	-0.126098	0.993883	0.0239703	0.988899	-0.0937138	0.98912		9.87111	9.89039	10.1977	10.1471	9.96128	10.1567	10.0207	10.0452	9.84905	10.0676	10.0231	10.2673	10.2365	9.85377	10.02
Ddx3x	ENSMUSG00000000787	ENSMUSG00000000787	-0.242942	0.269955	-0.207523	0.570432	-0.136498	0.733707	-0.1823	0.746342		10.2518	10.3054	10.3458	10.5241	10.4947	10.4325	10.456	10.3889	10.4713	10.5944	10.5313	10.3997	10.5235	10.5667	10.5453
Plpp3	ENSMUSG00000028517	ENSMUSG00000028517	-0.212549	0.894787	-0.613786	0.364982	-0.408314	0.633986	-0.276883	0.966979		9.05987	8.87221	9.84295	9.79669	9.53293	9.45757	9.73462	9.36765	10.0275	9.88607	10.1734	9.72306	9.30344	9.44889	9.8189
Pcbp1	ENSMUSG00000051695	ENSMUSG00000051695	0.0688914	0.95249	-0.043714	0.995681	0.0540455	0.968258	0.00183276	0.998729		10.0951	10.084	10.3235	10.1423	10.1536	10.2224	10.0602	10.184	10.116	10.1169	10.2078	10.3216	10.3521	9.96783	9.96178
Col8a1	ENSMUSG00000068196	ENSMUSG00000068196	-0.0984518	0.951761	-0.30185	0.81363	-0.158996	0.896821	-0.156546	0.9781		9.58533	9.70835	10.1875	10.0315	9.92631	10.0737	10.0276	9.85538	10.1456	10.1982	10.284	9.97144	9.93858	9.66028	10.2123
Rps4x	ENSMUSG00000031320	ENSMUSG00000031320	-0.317069	0.701878	0.0627296	0.995681	-0.29511	0.69212	-0.0564406	0.992218		9.33719	9.73099	10.2428	9.76305	9.85033	10.017	10.3391	10.0255	9.95938	9.77217	9.64553	9.85802	10.1159	10.0405	10.2551
Lrrc17	ENSMUSG00000039883	ENSMUSG00000039883	0.520843	0.170132	0.475464	0.34858	0.627078	0.0485459	0.345296	0.753568		10.9407	11.105	10.4933	10.4152	10.6313	10.5135	10.2346	10.4388	10.0203	10.4537	10.4154	10.3049	10.6636	10.2903	10.0125
Naca	ENSMUSG00000061315	ENSMUSG00000061315	-0.313644	0.89743	-0.199027	0.995681	-0.168945	0.959191	-0.267972	0.98795		8.57728	8.9858	9.90553	9.688	9.41404	9.49422	9.87563	9.25831	9.04883	9.43371	9.13975	9.76348	9.71958	9.47683	9.53979
Ubb	ENSMUSG00000019505	ENSMUSG00000019505	0.339951	0.445651	0.0667741	0.995681	0.185992	0.820391	0.101538	0.98912		10.1257	10.1188	10.3039	10.1069	10.0975	10.0521	9.72618	9.95418	10.2731	9.95955	10.3042	10.0766	9.88837	9.65505	9.9835
Hspa8	ENSMUSG00000015656	ENSMUSG00000015656	0.100308	0.961849	-0.253988	0.95461	-0.106496	0.956453	0.0771066	0.991778		9.68782	9.34416	9.95452	9.72083	9.61107	9.48568	9.43442	9.80167	10.0717	9.57981	10.08	10.0992	9.17135	9.80581	9.70582
Lrp1	ENSMUSG00000040249	ENSMUSG00000040249	-0.00443672	0.995885	-0.188848	0.824104	-0.0896387	0.915919	-0.19277	0.815145		10.1884	10.0717	10.084	10.4048	10.2207	10.2853	10.1676	10.1519	10.2889	10.2355	10.209	10.4493	10.1811	10.0271	10.1451
Rpl7a	ENSMUSG00000062647	ENSMUSG00000062647	0.212601	0.965879	0.287911	0.995681	0.11409	0.988899	0.128206	0.992218		8.23158	8.30551	9.96452	8.8347	8.94657	9.05757	9.24415	8.85362	8.74167	8.94773	8.63597	8.77138	9.12874	7.65207	9.31834
Esd	ENSMUSG00000021996	ENSMUSG00000021996	0.135371	0.917942	0.0331724	0.995681	0.208068	0.831321	0.0747636	0.990293		9.55125	9.72875	10.1824	9.78804	9.75933	9.78092	9.83224	9.76811	9.26558	9.77217	9.78572	9.89135	9.91958	9.61431	9.58921
Banf1	ENSMUSG00000024844	ENSMUSG00000024844	0.0848373	0.965879	-0.0341633	0.995681	0.101242	0.959191	-0.21552	0.967914		9.20519	9.34416	10.059	9.84633	9.78972	9.7844	9.54606	9.53062	9.39462	9.60422	9.64553	9.63023	9.84721	9.03928	9.52717
Serpinh1	ENSMUSG00000070436	ENSMUSG00000070436	0.199306	0.814175	0.0499842	0.995681	0.15692	0.861653	-0.182635	0.966979		9.82139	9.85371	10.1049	10.103	10.1342	10.1144	9.86491	9.87127	9.58169	9.8818	9.69001	10.0589	10.0038	9.49255	9.66607
Rps13-ps1	ENSMUSG00000066362	ENSMUSG00000066362	0.0749856	0.959224	-0.126094	0.995681	0.0230735	0.988899	-0.0166068	0.993307		10.2616	10.4297	10.2196	10.3182	10.369	10.2779	10.0749	10.4704	10.2756	10.3819	10.56	10.3432	10.1994	10.5157	9.91247
Cct3	ENSMUSG00000001416	ENSMUSG00000001416	-0.0289071	0.991488	0.00200674	0.998686	0.0914789	0.93969	-0.0712694	0.990293		10.0204	10.1694	10.2502	10.3026	10.1522	10.2069	10.2299	10.119	9.79736	10.261	10.1334	10.0473	10.3224	10.2341	9.95865
Col4a2	ENSMUSG00000031503	ENSMUSG00000031503	-0.262597	0.803299	-0.270146	0.914533	-0.279828	0.735676	-0.28766	0.925538		9.78576	9.66666	9.59518	9.95186	9.99388	9.9642	9.86491	9.99827	10.0188	9.5224	9.74882	10.4243	9.7145	10.2046	9.87145
Eef1d	ENSMUSG00000055762	ENSMUSG00000055762	-0.427385	0.151758	-0.0497874	0.995681	-0.326815	0.388922	0.0534344	0.991778		10.0693	10.1561	10.026	9.99759	9.98464	10.1075	10.4913	10.4942	10.2273	10.2028	9.94781	10.2324	10.3023	10.7915	10.3867
Rpl28	ENSMUSG00000030432	ENSMUSG00000030432	-0.716999	0.000351268	-0.476549	0.0974994	-0.526795	0.0284751	-0.393083	0.34365		9.56445	9.61889	9.59647	10.0357	9.87221	10.0391	10.3805	9.9452	9.98643	10.1205	9.80532	10.2417	10.3101	10.24	10.3703
Rbm25	ENSMUSG00000010608	ENSMUSG00000010608	-0.028204	0.985406	-0.140821	0.9391	0.1299	0.831321	0.167451	0.921332		10.4297	10.4297	10.2304	10.2104	10.1618	10.216	10.1272	10.1904	10.3733	10.4916	10.4778	10.5407	10.2852	10.5234	10.3549
Snrpb2	ENSMUSG00000008333	ENSMUSG00000008333	-0.0963582	0.862891	-0.0599784	0.995681	-0.0112639	0.989047	0.124302	0.948025		10.3188	10.389	10.408	10.2496	10.1713	10.3241	10.3589	10.4043	10.3915	10.4547	10.4173	10.4284	10.4025	10.5272	10.477
Cdkn1a	ENSMUSG00000023067	ENSMUSG00000023067	0.463298	0.0200437	0.496	0.0151561	0.484691	0.01205	0.476091	0.0232643		10.6351	10.6322	10.4954	10.1227	10.0759	10.1391	10.1948	10.1545	9.95177	10.2243	10.163	9.8712	10.2294	10.1399	9.9973
Hnrnpd	ENSMUSG00000000568	ENSMUSG00000000568	0.158625	0.860904	0.153858	0.993883	0.237874	0.678885	0.104377	0.98912		10.2288	10.4517	10.3799	10.1909	10.2961	10.2704	10.0987	10.3315	9.89579	10.3148	10.1688	10.1204	10.4088	10.2341	9.90761
Rpl17	ENSMUSG00000062328	ENSMUSG00000062328	0.332571	0.812248	0.165797	0.995681	0.383217	0.717414	0.199957	0.98319		9.39154	9.10503	9.93634	9.3072	9.21505	9.44221	9.10523	9.05627	9.2582	9.16962	9.03891	9.75833	9.51483	8.45713	9.39445
Arpc2	ENSMUSG00000006304	ENSMUSG00000006304	0.0661318	0.938565	0.0322661	0.995681	-0.00735796	0.994893	0.10474	0.967914		10.827	10.9074	10.665	10.6515	10.7533	10.6837	10.7447	10.8769	10.8001	10.8462	10.82	10.6322	10.7363	10.7578	10.7098
Midn	ENSMUSG00000035621	ENSMUSG00000035621	0.21618	0.839079	0.174058	0.993883	0.267124	0.734806	0.256568	0.944108		10.2469	9.94952	10.1202	9.83318	9.83155	9.89978	9.76296	10.1506	9.55584	9.77678	9.77046	10.2156	9.77102	10.2082	9.64286
Marcks	ENSMUSG00000069662	ENSMUSG00000069662	-0.173727	0.877414	-0.0541195	0.995681	-0.101397	0.944146	-0.310595	0.780388		9.67813	9.60424	9.9515	10.0523	10.0599	10.0822	9.95869	9.9452	9.64344	9.67013	9.59963	10.1022	10.2199	9.73653	9.77686
Asap1	ENSMUSG00000022377	ENSMUSG00000022377	-0.015357	0.993093	-0.106621	0.995681	0.0412962	0.984334	0.158041	0.966979		9.83888	9.77525	10.2079	9.80284	9.7755	9.82728	9.99849	9.87915	9.87341	9.98767	10.137	10.0683	9.81911	10.0176	10.076
Zyx	ENSMUSG00000029860	ENSMUSG00000029860	-0.117422	0.894787	-0.0558684	0.995681	-0.198854	0.70856	-0.125771	0.970897		10.1345	10.0681	10.2263	10.3811	10.2583	10.1634	10.3643	10.1388	10.506	10.1314	10.3429	10.1204	10.1725	10.1745	10.428
Ccdc80	ENSMUSG00000022665	ENSMUSG00000022665	-0.342883	0.555301	-0.301425	0.767027	-0.284191	0.639706	-0.215748	0.95908		9.90472	9.71518	9.86554	9.99866	10.0466	10.0921	9.851	10.0283	10.4071	9.88322	10.0812	10.3831	9.94148	10.2153	10.3345
Metap2	ENSMUSG00000036112	ENSMUSG00000036112	-0.000412291	0.999602	0.0600357	0.995681	0.0547493	0.968258	0.132504	0.967914		10.9658	10.8944	10.6132	10.6205	10.6912	10.7785	10.6416	10.8571	10.8186	10.788	10.8421	10.6759	10.7051	11.0451	10.7136
Lmna	ENSMUSG00000028063	ENSMUSG00000028063	-0.0434244	0.988836	0.151161	0.995681	0.0199344	0.989147	0.19573	0.967914		11.5653	11.2795	10.5785	11.0161	10.9576	11.0246	11.0914	11.1552	11.2733	11.1544	11.051	10.9181	11.1501	11.3975	11.1535
Atp5o ENSMUSG00000022956	ENSMUSG00000022956	ENSMUSG00000022956	-0.346962	0.284337	-0.287451	0.604898	-0.307972	0.378049	-0.128791	0.971075		10.1781	10.1826	9.95652	10.1529	10.2049	10.3432	10.3556	10.4808	10.4027	10.395	10.2968	10.4817	10.2887	10.7207	10.3052
Hnrnpm	ENSMUSG00000059208	ENSMUSG00000059208	-0.00656935	0.995885	-0.0285547	0.995681	0.239127	0.548068	0.0932513	0.98795		10.1131	10.181	10.2304	10.099	10.0643	10.0878	9.94566	9.98372	9.88464	10.3106	10.1942	10.1053	10.3423	10.2608	9.90923
Txn1	ENSMUSG00000028367	ENSMUSG00000028367	0.401733	0.872665	0.169609	0.995681	0.391296	0.868184	0.291473	0.98912		8.93938	8.78399	9.91484	8.97411	9.04173	9.03726	8.9915	8.85042	8.91127	9.08045	8.98704	9.32692	9.16888	7.86029	9.30854
Sf3b2	ENSMUSG00000024853	ENSMUSG00000024853	-0.010264	0.995885	0.0119279	0.995681	-0.0316741	0.988797	0.113088	0.982436		11.147	11.0091	10.6056	10.7891	10.8599	10.8182	10.8587	10.9874	11.0485	10.96	10.9943	10.8102	10.874	11.1083	10.8389
Nfkbia	ENSMUSG00000021025	ENSMUSG00000021025	0.522762	0.28123	0.169418	0.995681	0.378452	0.577172	0.396923	0.746342		9.13259	9.05923	10.0038	9.09523	9.08273	9.06044	9.03589	9.11351	9.14268	9.23362	9.40583	9.27195	9.06369	8.76933	9.01504
Map4k4	ENSMUSG00000026074	ENSMUSG00000026074	0.01604	0.995456	0.0174177	0.995681	0.0490024	0.985028	-0.00779812	0.99695		9.95571	9.82452	10.2179	10.098	10.0817	9.86563	9.83539	9.89167	10.1429	10.0243	10.2612	9.63164	10.0149	9.90019	10.0673
Eif1	ENSMUSG00000035530	ENSMUSG00000035530	0.0630151	0.981805	0.170261	0.995681	0.0882066	0.968258	0.116247	0.990293		9.04488	9.28723	10.0393	9.49199	9.30194	9.43557	9.73294	9.39429	9.12926	9.44534	9.23623	9.38657	9.64505	9.19394	9.52081
Mrfap1	ENSMUSG00000055302	ENSMUSG00000055302	0.00643682	0.995885	0.0107189	0.995681	0.0746872	0.956453	-0.0111933	0.994468		9.93959	10.0376	10.1112	10.099	10.0167	10.0126	10.0656	10.0212	9.76994	9.9663	9.91626	10.1688	10.2738	10.0176	9.73539
Rsl1d1	ENSMUSG00000005846	ENSMUSG00000005846	0.54936	0.542708	0.137262	0.995681	0.703745	0.224265	0.228633	0.980471		8.82117	8.82667	9.87829	9.07506	9.05356	9.00774	8.72622	8.39407	8.58528	9.18358	9.24729	8.96493	8.96454	8.06868	8.97841
S100a10	ENSMUSG00000041959	ENSMUSG00000041959	0.265945	0.830667	0.213643	0.993883	0.212694	0.870639	0.20688	0.970897		9.18481	9.29637	10.026	9.43931	9.25147	9.36049	9.5248	9.29175	9.20544	9.34543	9.33705	9.3562	9.65568	8.86302	9.25595
Romo1	ENSMUSG00000067847	ENSMUSG00000067847	-0.547161	0.0200437	-0.18531	0.940177	-0.409654	0.163553	-0.267252	0.7744		9.80591	10.0137	9.91278	10.092	10.2506	10.1939	10.5923	10.2729	10.0462	10.2455	10.0231	10.0142	10.5216	10.5537	10.2854
Ldha	ENSMUSG00000063229	ENSMUSG00000063229	0.250153	0.45944	0.304511	0.334518	0.155778	0.770075	0.218084	0.746992		10.4891	10.4986	10.4442	10.2324	10.2608	10.2853	10.2964	10.3944	10.2707	10.1445	10.1021	10.2664	10.4347	10.1046	10.1173
Fkbp4	ENSMUSG00000030357	ENSMUSG00000030357	-0.185104	0.818415	0.204519	0.917991	-0.169556	0.832022	0.0863474	0.990293		10.754	10.8022	10.3984	10.5152	10.548	10.6554	10.9273	10.8182	10.7351	10.5574	10.5457	10.2454	10.8008	11.0656	10.6334
Myof	ENSMUSG00000048612	ENSMUSG00000048612	-0.0790114	0.940091	-0.111583	0.993883	-0.129535	0.857243	-0.0219224	0.993307		10.3633	10.3249	10.3595	10.3613	10.4338	10.3169	10.3556	10.4409	10.6265	10.5725	10.5767	10.2052	10.4265	10.3389	10.5148
Atf4	ENSMUSG00000042406	ENSMUSG00000042406	0.469713	0.214085	0.360146	0.609845	0.522974	0.112653	0.596679	0.0576806		10.8138	10.8022	10.3211	10.0687	10.1412	9.98405	9.96444	10.184	10.2547	10.3074	10.3766	10.2175	9.88686	10.531	10.0817
Lamp2	ENSMUSG00000016534	ENSMUSG00000016534	0.153228	0.860904	-0.0220869	0.995681	0.0430363	0.985028	-0.229549	0.875677		9.73061	9.90041	9.98333	10.098	10.1202	10.1005	9.92368	9.9482	9.6071	9.7629	9.87547	10.0442	9.92105	9.51389	9.71142
Ybx3	ENSMUSG00000030189	ENSMUSG00000030189	0.168844	0.842331	0.095024	0.995681	0.26732	0.590365	0.075664	0.990293		10.2037	10.2151	10.3451	10.0072	10.2441	10.2828	9.89535	10.0184	10.0548	10.2209	10.3886	9.82514	10.2067	10.0162	10.0364
Anxa5	ENSMUSG00000027712	ENSMUSG00000027712	0.261518	0.695561	0.098885	0.995681	0.205574	0.782161	0.249363	0.871033		9.62367	9.84335	10.1556	9.6476	9.79678	9.48139	9.43649	9.80001	9.80751	9.82654	9.77352	9.79149	9.59436	9.6568	9.65451
Atp2b1	ENSMUSG00000019943	ENSMUSG00000019943	0.135357	0.802078	-0.0131442	0.995681	0.166523	0.651017	0.170722	0.823082		10.6414	10.5981	10.4456	10.2974	10.4706	10.4033	10.3805	10.39	10.4149	10.6203	10.6182	10.4817	10.3898	10.4688	10.4189
Rps10-ps1	ENSMUSG00000060438	ENSMUSG00000060438	-0.0193229	0.994404	0.0970231	0.995681	0.046085	0.985028	0.0371025	0.993165		10.6401	10.7861	10.3328	10.454	10.512	10.7022	10.454	10.7867	10.3779	10.6724	10.4665	10.3424	10.7438	10.8183	10.2123
Fscn1	ENSMUSG00000029581	ENSMUSG00000029581	-0.0226708	0.992047	-0.0764125	0.995681	-0.0370776	0.986683	-0.0335101	0.992463		9.66348	9.77743	10.0895	9.87811	9.74663	10.0391	9.76954	9.9467	9.96543	9.81314	9.9121	10.0683	10.0848	9.76917	9.76795
Ddx5	ENSMUSG00000020719	ENSMUSG00000020719	0.156323	0.82905	0.128713	0.993883	0.169674	0.782161	0.0721356	0.990293		10.0318	10.239	10.2583	10.1198	10.1849	10.02	9.99287	10.1414	9.89261	10.1011	10.0347	10.0239	10.2246	9.97205	9.85471
Mtch2	ENSMUSG00000027282	ENSMUSG00000027282	-0.101579	0.923226	-0.0832484	0.995681	0.0353636	0.986683	-0.142808	0.967914		9.92328	10.146	10.0858	10.1871	10.2583	10.1459	10.0934	10.1401	9.80414	10.2719	9.98795	10.1413	10.2898	10.2481	9.89947
Hnrnpdl	ENSMUSG00000029328	ENSMUSG00000029328	0.0558352	0.965879	-0.0219232	0.995681	0.146787	0.840922	-0.0748026	0.990293		10.1185	10.0376	10.1703	10.189	10.2723	10.0893	9.89835	10.0744	9.91469	10.2187	10.2258	9.93766	10.2715	10.0338	9.82407
Csnk1a1	ENSMUSG00000024576	ENSMUSG00000024576	0.127493	0.839491	0.0786367	0.995681	-0.0365165	0.981108	0.147383	0.953707		10.3404	10.4338	10.405	10.2649	10.239	10.2365	10.2803	10.4249	10.572	10.3534	10.4173	10.1668	10.2447	10.3037	10.2512
Tm4sf1	ENSMUSG00000027800	ENSMUSG00000027800	-0.000971492	0.999155	-0.267812	0.98619	-0.03443	0.988899	0.0126905	0.995331		9.03353	9.14268	9.88567	9.33121	9.41634	9.44662	9.44886	9.31518	9.56184	9.64346	9.72843	9.65954	9.67149	8.63411	9.70021
Ckap4	ENSMUSG00000046841	ENSMUSG00000046841	-0.129973	0.829691	-0.0714362	0.995681	-0.221085	0.46251	-0.0501443	0.990293		10.534	10.3353	10.3776	10.3991	10.4304	10.5681	10.7117	10.5456	10.6502	10.4869	10.5258	10.4517	10.444	10.549	10.6412
Ssb	ENSMUSG00000068882	ENSMUSG00000068882	-0.249579	0.804828	-0.297154	0.845975	0.0129218	0.994893	0.196405	0.967914		9.97165	9.91037	9.6358	9.65713	9.67375	9.61464	9.46518	9.74587	10.1902	10.1011	10.1547	10.1639	9.75792	10.4172	10.026
Psmd7	ENSMUSG00000039067	ENSMUSG00000039067	0.01169	0.995456	0.0114119	0.995681	-0.0593185	0.95768	0.0876921	0.98912		10.6099	10.5325	10.4182	10.3885	10.5311	10.3759	10.4823	10.4953	10.7465	10.5276	10.5412	10.4581	10.3511	10.6878	10.4671
Sqstm1	ENSMUSG00000015837	ENSMUSG00000015837	0.670408	0.00584344	0.623926	0.0230135	0.658566	0.00871214	0.674657	0.00850709		10.5001	10.7665	10.3047	9.7286	9.99542	9.85241	9.781	9.97639	9.87019	10.1693	9.91626	9.59887	9.91073	9.96502	9.70955
Gm6109	ENSMUSG00000113237	ENSMUSG00000113237	-0.167261	0.976231	-0.0444217	0.995681	-0.0728688	0.988899	-0.2906	0.990293		8.08537	8.17945	9.68137	9.21988	8.92097	9.25641	9.2838	9.03949	8.26514	9.15317	8.60533	8.87735	9.56081	8.41237	8.84236
Serpinb6a	ENSMUSG00000060147	ENSMUSG00000060147	-0.0561168	0.951761	-0.0107073	0.995681	-0.0542543	0.951899	0.0604713	0.990293		10.0932	10.2022	10.2944	10.1129	10.1146	10.1978	10.3021	10.1532	10.3081	10.1421	10.271	10.2222	10.2424	10.2653	10.2665
Srsf11	ENSMUSG00000055436	ENSMUSG00000055436	-0.0862859	0.923226	-0.188662	0.848859	-0.0702142	0.944146	0.0909495	0.98795		10.0582	9.94178	10.0009	9.91829	9.87388	9.93784	10.0386	10.0867	10.0871	10.2085	10.0283	10.3137	9.90629	10.2619	10.0702
Inhba	ENSMUSG00000041324	ENSMUSG00000041324	0.00650146	0.995885	-0.0416458	0.995681	0.0461702	0.984334	-0.169738	0.967914		9.58274	9.80117	10.0221	9.97708	10	9.98253	9.87716	9.84415	9.57379	9.87608	9.84374	9.85682	10.0623	9.69467	9.63699
Lpp	ENSMUSG00000033306	ENSMUSG00000033306	-0.26523	0.681503	-0.202281	0.922954	-0.342882	0.383873	-0.225336	0.925538		10.2037	9.93789	10.0534	10.2397	10.2911	10.3479	10.2465	10.3678	10.5956	10.2522	10.3398	10.2165	9.97016	10.3891	10.5763
Cyb5r3	ENSMUSG00000018042	ENSMUSG00000018042	-0.125324	0.894787	-0.0325806	0.995681	-0.13077	0.872261	-0.117505	0.9781		10.0786	10.0248	10.1538	10.1663	10.1875	10.2605	10.4973	10.1243	9.98196	10.1844	10.119	10.0557	10.2482	10.2925	10.0889
Cct8	ENSMUSG00000025613	ENSMUSG00000025613	0.135646	0.843611	-0.00306811	0.996579	0.0850799	0.93541	0.157931	0.95908		10.0563	10.1119	10.2129	9.95407	10.0092	9.9565	9.82594	10.1532	10.1362	10.0359	10.271	10.0838	10.0476	9.93944	9.9973
Nedd4	ENSMUSG00000032216	ENSMUSG00000032216	-0.270515	0.716729	-0.274319	0.82826	-0.341535	0.496211	-0.154431	0.974212		9.97759	9.9064	9.89929	10.0819	10.0258	10.135	10.0427	10.0227	10.6483	10.2198	10.2936	10.0828	9.93421	10.2306	10.3913
Atp5j2	ENSMUSG00000038690	ENSMUSG00000038690	0.0607244	0.960782	0.0935158	0.995681	-0.00263627	0.999106	0.200045	0.884634		10.7586	10.7936	10.4255	10.4399	10.3595	10.5892	10.7262	10.719	10.552	10.5857	10.5421	10.5879	10.5795	10.7471	10.4737
Wnk1	ENSMUSG00000045962	ENSMUSG00000045962	-0.0291171	0.991075	0.0654137	0.995681	0.0337702	0.985028	0.112421	0.980471		10.6376	10.5118	10.3739	10.3795	10.3749	10.4381	10.3302	10.5217	10.566	10.5698	10.4105	10.3449	10.4285	10.7626	10.3948
Rpl10	ENSMUSG00000008682	ENSMUSG00000008682	-0.161229	0.965396	0.173333	0.995681	-0.0443423	0.989147	0.0474142	0.993307		8.49141	8.43806	9.78544	9.02757	8.95921	9.0314	9.50125	8.90393	8.77998	8.83731	8.68888	9.08913	9.43272	8.75962	9.35928
Psmd1	ENSMUSG00000026229	ENSMUSG00000026229	0.0118518	0.995456	-0.0559735	0.995681	0.0536288	0.96331	0.00650822	0.995331		9.93349	10.0628	10.1211	10.0819	10.0076	10.0185	9.93104	10.0826	9.95177	10.1457	10.0787	10.0724	10.2377	9.90313	9.92856
mt-Tp	ENSMUSG00000064372	ENSMUSG00000064372	0.252864	0.804828	0.214099	0.975477	0.182302	0.875263	0.288844	0.920649		11.4072	11.2119	10.6094	10.7464	10.7578	10.9582	10.6771	10.9565	11.1229	10.7979	11.1243	10.744	10.8386	10.6619	11.0529
Nedd8	ENSMUSG00000010376	ENSMUSG00000010376	0.137923	0.842331	0.0731967	0.995681	0.169634	0.749506	0.0329805	0.992218		10.4918	10.5644	10.3297	10.3571	10.5012	10.4303	10.2606	10.3452	10.2744	10.4019	10.4349	10.332	10.4902	10.3584	10.0989
Vapa	ENSMUSG00000024091	ENSMUSG00000024091	0.120481	0.956106	0.0127152	0.995681	0.216167	0.891013	-0.0259895	0.993307		8.71625	9.18922	9.88988	9.32097	9.40484	9.41098	9.25593	9.23393	8.89867	9.42591	9.3329	9.25924	9.4633	8.80754	9.34975
Msn	ENSMUSG00000031207	ENSMUSG00000031207	-0.129996	0.934467	-0.118352	0.995681	-0.125334	0.942536	0.260984	0.95908		10.5015	10.2641	9.84728	9.92619	10.0288	9.94253	10.0467	10.2895	10.653	10.3021	10.4617	10.2618	9.88536	10.5565	10.5317
Sae1	ENSMUSG00000052833	ENSMUSG00000052833	0.269673	0.714279	0.216889	0.926897	0.232025	0.756285	0.316514	0.753568		11.0988	10.8833	10.4822	10.4742	10.5152	10.5852	10.3977	10.7546	10.654	10.6624	10.7163	10.4864	10.4368	10.8322	10.4063
Tsn	ENSMUSG00000026374	ENSMUSG00000026374	-0.157108	0.836523	0.0202226	0.995681	-0.154107	0.831321	0.0231214	0.993307		10.5971	10.6128	10.2672	10.4849	10.4551	10.4838	10.6479	10.7356	10.566	10.6066	10.4232	10.3948	10.5216	10.8658	10.5495
Cav1	ENSMUSG00000007655	ENSMUSG00000007655	0.435884	0.714279	0.404692	0.869733	0.677271	0.262858	0.299846	0.967914		8.82994	8.9124	9.78093	8.92086	9.05356	8.87016	8.71943	8.6513	8.3276	8.91185	8.74618	8.87498	9.38025	8.30071	8.52865
Nap1l1	ENSMUSG00000058799	ENSMUSG00000058799	0.0922541	0.894787	0.0234939	0.995681	0.0404442	0.968258	0.044087	0.990293		10.421	10.5795	10.3843	10.3885	10.4236	10.4436	10.3589	10.4086	10.4956	10.5249	10.4665	10.3198	10.3877	10.3159	10.4063
Gsn	ENSMUSG00000026879	ENSMUSG00000026879	-0.195625	0.88952	-0.21173	0.993883	-0.264758	0.795701	-0.198901	0.967914		9.0524	9.12227	9.7978	9.6004	9.47471	9.62829	9.75468	9.44189	9.6899	9.43954	9.4677	9.80779	9.73135	9.17457	9.72622
Phlda1	ENSMUSG00000020205	ENSMUSG00000020205	0.210532	0.812248	-0.0332577	0.995681	0.0325243	0.988899	0.154859	0.971075		9.73529	9.41301	9.93837	9.54574	9.62898	9.50694	9.51895	9.657	9.85396	9.47779	9.78116	9.94561	9.40777	9.45091	9.6487
Dstn	ENSMUSG00000015932	ENSMUSG00000015932	-0.193047	0.900548	0.0203794	0.995681	-0.21954	0.868184	-0.0262558	0.993307		10.6867	10.7488	9.83534	10.5241	10.5501	10.4314	10.67	10.4798	10.9054	10.5457	10.7618	9.94448	10.5206	10.7406	10.7357
Dync1i2	ENSMUSG00000027012	ENSMUSG00000027012	-0.0135518	0.995456	-0.115088	0.995681	0.00561297	0.996577	0.0927731	0.98912		10.3031	10.3456	9.91794	10.1974	10.0846	10.0244	10.1156	10.1584	10.295	10.2288	10.2775	10.4211	10.1017	10.3944	10.1159
Fcf1	ENSMUSG00000021243	ENSMUSG00000021243	-0.0666824	0.965879	-0.000210674	0.999777	0.0751024	0.963552	0.168434	0.967914		10.5327	10.5222	10.0895	10.1871	10.2312	10.2567	10.1323	10.401	10.4049	10.5	10.3522	10.3216	10.3291	10.7955	10.1791
Rpl6	ENSMUSG00000029614	ENSMUSG00000029614	-0.0300308	0.991488	0.207146	0.948486	0.0579786	0.980748	0.205716	0.966979		9.42666	9.59933	10.0345	9.50109	9.45922	9.57091	9.84165	9.53062	9.58169	9.4607	9.46391	9.59887	9.85492	9.46093	9.8847
Elob	ENSMUSG00000055839	ENSMUSG00000055839	-0.015403	0.993088	-0.00975419	0.995681	0.130676	0.840213	-0.0970458	0.980674		10.0375	10.0787	10.0496	10.0869	10.1577	10.2108	9.89835	10.0396	9.82926	9.90865	10.0675	10.2014	10.2079	10.0121	9.98042
Eif4ebp1	ENSMUSG00000031490	ENSMUSG00000031490	-0.0530967	0.977453	0.245854	0.887573	0.131557	0.915919	0.0580864	0.992218		9.72592	9.82452	10.084	9.74145	9.85033	9.89978	10.0709	9.70212	9.4279	9.77217	9.57173	9.58148	10.1197	9.83694	9.85133
Cnbp	ENSMUSG00000030057	ENSMUSG00000030057	0.188698	0.804361	0.0458882	0.995681	0.356477	0.27378	0.139846	0.967914		9.58533	9.60179	9.96152	9.55451	9.64667	9.57896	9.34242	9.51452	9.26558	9.69308	9.59963	9.76219	9.7162	9.51003	9.38749
Eif5b	ENSMUSG00000026083	ENSMUSG00000026083	-0.0332866	0.991075	-0.289929	0.68434	0.0062852	0.996534	0.0316919	0.993165		9.95571	9.88434	9.80561	9.85582	9.86887	9.82559	9.67446	9.76641	10.1429	10.2422	10.1489	10.1184	9.64327	10.1261	9.93495
Grn	ENSMUSG00000034708	ENSMUSG00000034708	0.0998243	0.965879	0.226406	0.993883	-0.169903	0.935918	0.265442	0.967914		10.8049	10.5694	9.73025	10.1059	10.1118	10.2841	10.0947	10.5624	11.0102	10.1386	10.3563	10.1184	10.0176	10.4538	10.4868
C1qbp	ENSMUSG00000018446	ENSMUSG00000018446	0.332999	0.804828	0.0646704	0.995681	0.188699	0.92022	0.0835027	0.992218		8.72097	8.98203	9.80672	9.15794	9.09709	9.2539	9.23228	8.98795	8.96365	9.20654	9.29926	9.05382	9.32136	8.37044	8.92488
Ier3	ENSMUSG00000003541	ENSMUSG00000003541	0.556677	0.146853	0.447002	0.48919	0.415566	0.405008	0.656168	0.0573019		10.9518	10.5517	10.1789	9.99973	9.82983	9.97949	10.0331	10.2681	10.2235	10.1133	10.2645	10.0557	9.69573	10.3368	10.0095
Pdcd4	ENSMUSG00000024975	ENSMUSG00000024975	-0.0297186	0.991488	-0.109247	0.995681	0.0947663	0.956453	-0.218192	0.966979		9.40628	9.76651	9.80672	9.85936	9.95182	9.85738	9.58019	9.77994	9.34205	9.88465	9.72368	9.73097	10.0435	9.70314	9.25084
Mif	ENSMUSG00000033307	ENSMUSG00000033307	-0.567259	0.00597413	-0.322668	0.508152	-0.507896	0.0240862	-0.306158	0.648652		9.52178	9.56444	9.74773	9.88392	9.86047	10.02	10.3632	10.1029	9.86047	10.0308	9.95728	9.82391	10.1172	10.22	10.2097
Capns1	ENSMUSG00000001794	ENSMUSG00000001794	-0.139372	0.894787	0.11767	0.995681	-0.124373	0.915628	0.0959502	0.989443		10.8986	11.0734	10.416	10.6371	10.7277	10.8011	10.9594	10.952	10.9172	10.8571	10.6369	10.5973	10.8533	11.1349	10.8675
Ankrd11	ENSMUSG00000035569	ENSMUSG00000035569	-0.196851	0.865796	-0.223598	0.961528	-0.155053	0.912651	0.125402	0.98912		10.2054	10.0156	9.61309	9.95958	9.71718	9.8222	10.0562	9.89944	10.3562	10.1552	10.2979	10.0941	9.74304	10.4508	10.1938
Dync1h1	ENSMUSG00000018707	ENSMUSG00000018707	-0.0872623	0.984235	-0.0548432	0.995681	-0.109947	0.981162	0.283141	0.980471		10.1363	10.0174	9.10294	9.53249	9.46809	9.60482	9.5988	9.99827	10.1335	9.72205	9.74101	10.1184	9.33686	10.3891	9.79453
Aplp2	ENSMUSG00000031996	ENSMUSG00000031996	-0.352648	0.371474	-0.139176	0.993883	-0.330704	0.408615	-0.111246	0.98912		10.1398	10.0911	9.81227	10.093	10.1132	10.1807	10.2757	10.2705	10.4872	10.1445	10.0154	10.296	10.0368	10.5443	10.4781
Puf60	ENSMUSG00000002524	ENSMUSG00000002524	-0.334067	0.360587	-0.152682	0.986701	-0.325527	0.362086	-0.0896285	0.98912		10.2841	10.2311	9.94243	10.1946	10.1875	10.3514	10.5755	10.4963	10.3642	10.4699	10.2634	10.1794	10.3202	10.7014	10.4201
Cox7c	ENSMUSG00000017778	ENSMUSG00000017778	0.466955	0.922301	0.191118	0.995681	0.464574	0.92795	0.168348	0.992218		8.03315	8.00459	9.51988	8.43024	8.6244	8.56435	8.56895	8.19127	7.91071	8.39283	8.08974	8.9424	8.89444	6.30648	8.47707
Gm6883	ENSMUSG00000117515	ENSMUSG00000117515	-0.424253	0.818415	0.0697235	0.995681	-0.218971	0.93969	-0.345728	0.967914		8.70675	8.88842	9.5374	9.49199	9.39091	9.42445	9.82119	9.21911	8.65813	9.24254	8.87734	8.92411	9.89736	9.30939	9.24315
Ctsd	ENSMUSG00000007891	ENSMUSG00000007891	0.141787	0.902328	0.155513	0.993883	0.000840546	0.999106	0.115128	0.98912		11.1087	11.2343	10.4484	10.8533	10.7997	10.9	10.7859	11.0213	11.074	10.8092	10.8845	10.7368	10.7505	10.9351	10.7824
Atxn7l3b	ENSMUSG00000074748	ENSMUSG00000074748	0.106651	0.959224	0.0686257	0.995681	-0.180966	0.911578	-0.188928	0.980471		9.16068	9.18266	9.76499	9.65984	9.48348	9.62051	9.68844	9.40743	9.63586	9.07796	9.45248	9.44064	9.34346	8.70668	9.67945
Rab14	ENSMUSG00000026878	ENSMUSG00000026878	0.164175	0.814175	0.120959	0.993883	0.138411	0.842929	0.091032	0.98912		10.6599	10.8742	10.3843	10.5448	10.6372	10.4923	10.4803	10.5357	10.5194	10.5349	10.631	10.4154	10.5551	10.5186	10.3785
Smc1a	ENSMUSG00000041133	ENSMUSG00000041133	-0.154321	0.864209	-0.190779	0.926897	-0.223913	0.695749	0.00945974	0.995331		10.2857	10.1875	9.89929	10.172	10.1768	10.0051	10.1576	10.3486	10.5297	10.342	10.3542	10.2627	10.0636	10.4807	10.2766
Col3a1	ENSMUSG00000026043	ENSMUSG00000026043	-0.0778896	0.963295	-0.150231	0.995681	-0.205285	0.831321	-0.276293	0.891359		9.85401	9.4158	9.6495	9.83198	10.0213	9.91893	9.82277	9.78834	9.94872	9.46642	9.69001	10.1532	9.80325	9.47683	9.87477
Pttg1ip	ENSMUSG00000009291	ENSMUSG00000009291	-0.253723	0.688024	-0.10257	0.995681	-0.148091	0.861095	0.0356486	0.992218		9.81698	9.6596	9.87723	9.78681	9.65251	9.8154	10.0656	9.89479	9.83919	9.91424	9.80981	9.94561	9.75132	10.3269	9.98812
Ranbp1	ENSMUSG00000005732	ENSMUSG00000005732	-0.0191735	0.991488	0.0424079	0.995681	0.079423	0.93969	0.00450436	0.997415		10.0914	10.2438	10.1547	10.2169	10.2141	10.0405	10.0372	10.073	10.1443	10.1326	10.3064	9.90306	10.2103	10.2141	10.1243
Smarca4	ENSMUSG00000032187	ENSMUSG00000032187	-0.278556	0.721829	-0.0665942	0.995681	-0.339064	0.543378	0.030529	0.993307		10.5407	10.4973	9.8255	10.2496	10.2286	10.3828	10.5914	10.6589	10.7181	10.4907	10.4281	10.225	10.3823	10.8445	10.5233
Kif5b	ENSMUSG00000006740	ENSMUSG00000006740	-0.069476	0.950605	-0.174965	0.896556	-0.0638388	0.956453	0.102252	0.980471		9.94565	10.1527	10.0154	9.89547	9.99848	9.92052	10.0736	10.0661	10.1694	10.2119	10.2656	10.1649	9.86717	10.2801	10.1506
Csf1	ENSMUSG00000014599	ENSMUSG00000014599	0.695227	0.333507	0.223008	0.995681	0.647176	0.374406	0.518378	0.769126		8.34609	8.31754	9.63454	8.31457	8.45184	8.43726	8.4632	8.13446	8.20498	8.79854	8.76786	8.4992	8.18133	7.85422	8.56204
Rpl36	ENSMUSG00000057863	ENSMUSG00000057863	-0.5498	0.0200437	-0.326128	0.570432	-0.346329	0.345622	-0.0850808	0.990293		9.8817	9.73099	9.43612	9.78432	9.63687	9.8901	10.0656	10.0184	10.0188	10.09	9.89249	10.0526	10.0368	10.4678	10.1724
Psap	ENSMUSG00000004207	ENSMUSG00000004207	-0.643939	0.310926	-0.399805	0.861634	-0.499187	0.541581	-0.574116	0.637844		8.53498	8.5895	9.33954	9.32439	9.52019	9.48996	9.81483	9.01967	9.15068	9.00648	9.08405	9.64147	9.68712	9.06843	9.70769
Pdia3	ENSMUSG00000027248	ENSMUSG00000027248	0.047734	0.975433	-0.175586	0.935382	-0.00803367	0.994893	-0.11092	0.982436		10.3219	10.278	9.8666	10.2922	10.3196	10.2121	10.145	10.0908	10.2768	10.3606	10.474	10.1707	10.0861	10.2094	10.0512
Cox6b1	ENSMUSG00000036751	ENSMUSG00000036751	-0.247587	0.730084	-0.0370669	0.995681	-0.137518	0.908135	-0.184448	0.967914		9.39154	9.55939	9.85052	9.73504	9.81079	9.85738	9.95725	9.60092	9.68073	9.70925	9.4677	9.76861	10.0834	9.66202	9.81544
Psmd2	ENSMUSG00000006998	ENSMUSG00000006998	0.120808	0.879839	-0.0382517	0.995681	0.0256224	0.988899	0.0209221	0.993307		9.88591	9.9064	10.0525	9.91375	10.0076	9.8722	9.90734	9.91025	9.96392	10.0751	10.1142	9.76219	9.80325	9.93225	9.75538
Nmt1	ENSMUSG00000020936	ENSMUSG00000020936	-0.204795	0.865796	0.0322261	0.995681	-0.21378	0.840213	0.159046	0.982436		10.421	10.2135	9.6643	9.89662	9.95656	10.0579	10.2849	10.3988	10.3434	10.123	10.1154	10.0547	9.96018	10.7553	10.1642
Gm16200	ENSMUSG00000081520	ENSMUSG00000081520	-0.278181	0.810534	-0.0592762	0.995681	-0.0379479	0.988899	-0.319671	0.920923		9.12904	9.39326	9.67164	9.62141	9.67758	9.89656	9.64073	9.67702	8.93616	9.73158	9.23177	9.42447	9.92252	9.74968	9.35452
Anp32b	ENSMUSG00000028333	ENSMUSG00000028333	-0.0173875	0.993093	0.0523851	0.995681	0.022434	0.988899	0.180077	0.966979		10.6855	10.5196	10.2485	10.172	10.363	10.3977	10.4271	10.4777	10.506	10.512	10.4522	10.3544	10.3521	10.8026	10.3236
Neat1	ENSMUSG00000092274	ENSMUSG00000092274	-0.236328	0.671456	-0.18148	0.921832	-0.173899	0.794594	-0.00379412	0.997635		10.2745	10.2857	9.92102	10.1316	10.1342	10.2416	10.2664	10.3118	10.4347	10.2686	10.4261	10.3415	10.1873	10.5593	10.4336
Atp2a2	ENSMUSG00000029467	ENSMUSG00000029467	0.103212	0.958738	0.073587	0.995681	0.136183	0.93969	-0.0152663	0.994837		8.799	8.95919	9.71612	9.22904	9.2566	9.23364	9.20823	9.00246	9.04883	8.99598	8.95229	9.44866	9.21034	8.97638	9.16924
Rps23	ENSMUSG00000049517	ENSMUSG00000049517	0.204225	0.963295	0.119703	0.995681	0.0889835	0.988899	0.278535	0.990293		8.04073	8.11203	9.55207	8.35528	8.53859	8.53154	8.96304	8.5796	8.39197	8.48586	8.40248	8.95145	8.84574	7.60222	8.87925
Slit2	ENSMUSG00000031558	ENSMUSG00000031558	-0.181327	0.891751	-0.476389	0.408759	-0.0605216	0.983378	-0.573443	0.188807		9.30923	9.24379	8.76362	9.84871	9.80904	9.35816	9.14124	8.9193	9.43228	9.35984	9.70934	9.68284	9.16144	9.31383	9.41287
Cdc42	ENSMUSG00000006699	ENSMUSG00000006699	0.178552	0.737793	0.0414987	0.995681	0.101121	0.907477	-0.0205492	0.993307		9.75154	9.64774	9.90864	9.80284	9.87555	9.7112	9.63352	9.74587	9.64909	9.65352	9.67205	9.87001	9.64327	9.57424	9.58109
Rps27l	ENSMUSG00000036781	ENSMUSG00000036781	0.111994	0.927236	0.12441	0.995681	0.145323	0.896202	0.061922	0.990404		9.36462	9.43248	9.90968	9.45031	9.57664	9.57695	9.45908	9.36316	9.52951	9.48532	9.40187	9.52799	9.72464	9.29378	9.40139
Cct2	ENSMUSG00000034024	ENSMUSG00000034024	0.0869312	0.956761	-0.0799558	0.995681	0.115544	0.93969	-0.146376	0.980471		9.18481	9.30243	9.77639	9.55742	9.67949	9.55058	9.455	9.27273	9.27292	9.57981	9.52156	9.48965	9.64327	9.04995	9.34016
Rpl7a-ps3	ENSMUSG00000068579	ENSMUSG00000068579	-0.568945	0.791527	-0.0313877	0.995681	-0.323447	0.916397	-0.174988	0.990293		8.29631	8.44903	9.36694	9.02336	8.99033	8.87016	9.7679	8.86953	8.31342	9.06042	8.53121	8.82164	9.66799	9.16479	9.16924
Calm2	ENSMUSG00000036438	ENSMUSG00000036438	-0.11957	0.903543	0.0790332	0.995681	-0.0564321	0.968258	0.237224	0.850935		10.3188	10.0026	10.1477	9.79915	10.0182	9.95341	10.18	9.98518	10.4509	10.1205	10.0837	10.0442	10.1069	10.3093	10.4109
Hspe1	ENSMUSG00000073676	ENSMUSG00000073676	-0.0108705	0.995885	-0.0507938	0.995681	-0.0935104	0.956453	-0.0607044	0.992218		9.18139	9.4158	9.82659	9.60743	9.58685	9.50059	9.84165	9.58944	9.31622	9.63502	9.584	9.44385	9.69745	9.30939	9.51656
Slc38a2	ENSMUSG00000022462	ENSMUSG00000022462	-0.0446599	0.975433	-0.067911	0.995681	-0.183687	0.740058	-0.20021	0.891359		10.047	10.1826	9.78093	10.2693	10.2506	10.0963	10.145	10.2942	10.1295	10.1023	9.92042	10.1909	10.0795	10.0039	10.0745
Capzb	ENSMUSG00000028745	ENSMUSG00000028745	-0.0341821	0.991488	-0.0604743	0.995681	-0.0290197	0.988899	-0.000884417	0.999042		9.30294	9.16614	9.78544	9.44246	9.27693	9.60876	9.61718	9.4859	9.31147	9.50398	9.49581	9.52496	9.68885	8.93095	9.70209
Prrc2c	ENSMUSG00000040225	ENSMUSG00000040225	-0.0147672	0.995821	-0.145186	0.995681	-0.0488219	0.985028	0.240403	0.941412		10.325	10.2311	9.85805	9.83438	9.91013	9.98101	9.96157	10.0771	10.4977	10.3677	10.3491	10.1551	9.86106	10.3368	10.2499
Psmd8	ENSMUSG00000030591	ENSMUSG00000030591	-0.0188734	0.993753	0.173224	0.993883	0.152717	0.890715	0.0549711	0.992218		9.46095	9.55939	9.85482	9.5919	9.52657	9.63216	9.64968	9.5971	9.16654	9.39025	9.39592	9.60175	9.9048	9.45693	9.57293
Mmp13	ENSMUSG00000050578	ENSMUSG00000050578	-0.328343	0.788125	-0.958925	0.013566	-0.384124	0.672709	-0.711428	0.186554		7.95511	7.98211	8.92594	9.25437	9.13934	8.80987	8.98585	8.50007	8.74167	9.14843	9.24288	9.55498	8.72304	8.74656	8.63052
Sub1	ENSMUSG00000022205	ENSMUSG00000022205	0.107501	0.95249	0.164046	0.995681	0.0966657	0.959691	0.236041	0.967914		10.9953	11.0007	10.2129	10.4602	10.644	10.5187	10.3534	10.7216	10.9156	10.674	10.7695	10.3722	10.6117	10.9191	10.4404
Aldoa ENSMUSG00000030695	ENSMUSG00000030695	ENSMUSG00000030695	0.0750361	0.934467	0.143493	0.947243	0.00839578	0.994893	0.0846259	0.98912		10.6251	10.7499	10.3595	10.4963	10.4484	10.5508	10.5091	10.6368	10.5769	10.5331	10.4105	10.3739	10.503	10.5686	10.4516
Itm2b	ENSMUSG00000022108	ENSMUSG00000022108	-0.0108973	0.995885	-0.0726366	0.995681	0.0529179	0.985028	-0.169634	0.980471		9.17452	9.18922	9.66184	9.52953	9.44132	9.6244	9.38808	9.38103	9.15598	9.42395	9.32038	9.55647	9.79366	8.9453	9.2585
Col5a1	ENSMUSG00000026837	ENSMUSG00000026837	0.102375	0.930833	-0.0258341	0.995681	0.0891171	0.944146	0.0849323	0.990293		9.76074	9.75771	9.73727	9.7091	9.63687	9.65328	9.455	9.65149	9.85559	9.51873	9.70934	10.0494	9.4633	9.69976	9.76974
Mtpn	ENSMUSG00000029840	ENSMUSG00000029840	0.103983	0.879839	0.0637819	0.995681	0.0719556	0.93837	-0.00144187	0.998729		10.0204	10.0875	10.1202	9.99222	10.0759	10.1688	9.94711	10.0853	9.98345	10.0563	10.0474	9.9388	9.92399	10.0814	9.91086
Psmc5	ENSMUSG00000020708	ENSMUSG00000020708	-0.259515	0.695245	0.00586074	0.995681	-0.278481	0.583222	0.0969932	0.98912		10.1952	10.1291	9.87617	9.94965	9.82639	10.1296	10.4135	10.3856	10.2386	10.2566	9.97069	9.94675	10.1312	10.5723	10.2461
Tmed9	ENSMUSG00000058569	ENSMUSG00000058569	-0.018617	0.992524	-0.0371846	0.995681	-0.0376474	0.985028	-0.227051	0.847989		9.65857	9.84543	9.8178	9.96508	10.1018	9.9394	9.89233	9.93314	9.59543	9.74576	9.81874	9.87478	10.0094	9.64101	9.70955
Prdx5	ENSMUSG00000024953	ENSMUSG00000024953	-0.211074	0.610602	-0.251898	0.531323	-0.438943	0.00926356	-0.215349	0.746342		9.59823	9.65723	9.6753	9.94854	9.71718	9.89817	10.0669	10.0494	10.1295	9.9582	9.78116	9.94107	9.77265	9.87642	9.91409
Gm44336	ENSMUSG00000107541	ENSMUSG00000107541	-0.401269	0.671456	0.0918568	0.995681	-0.261968	0.831788	-0.314832	0.941946		8.92308	9.15948	9.51988	9.42981	9.50087	9.67598	9.81801	9.50436	9.02872	9.34543	8.93597	9.09323	10.0422	9.31161	9.40599
Crip2	ENSMUSG00000006356	ENSMUSG00000006356	-0.224814	0.855708	-0.0509429	0.995681	-0.154853	0.92022	0.264705	0.95908		9.55919	9.33236	9.43036	9.1675	9.23338	9.13879	9.77774	9.66249	9.31147	9.43566	9.22954	9.76348	9.32581	10.1224	9.41287
Prpf40a	ENSMUSG00000061136	ENSMUSG00000061136	-0.0482151	0.961849	-0.0563074	0.995681	0.111347	0.840213	0.0915329	0.9781		9.81698	10.0007	9.98627	9.83198	9.9439	9.76336	9.78588	9.84254	9.85559	10.0575	9.98134	9.94561	10.0094	9.99844	9.95237
Rps11	ENSMUSG00000003429	ENSMUSG00000003429	-0.39382	0.860904	-0.112587	0.995681	-0.314681	0.907779	-0.258806	0.98912		8.37034	8.55437	9.44472	9.08719	9.13378	9.1711	9.78426	8.95552	8.52914	8.94773	8.81325	9.17282	9.43889	9.00407	9.31834
Rock1	ENSMUSG00000024290	ENSMUSG00000024290	-0.342316	0.339495	-0.533703	0.0255177	-0.20515	0.733707	-0.200269	0.937456		9.33411	9.4158	9.38194	9.58764	9.66221	9.47494	9.46518	9.42476	9.8226	9.89175	9.96266	9.8712	9.48135	9.84614	9.80153
Uqcrh	ENSMUSG00000063882	ENSMUSG00000063882	-0.0464974	0.966607	0.0129921	0.995681	-0.138336	0.834598	-0.0193205	0.993307		10.5165	10.5682	10.2204	10.377	10.474	10.5229	10.454	10.6479	10.6227	10.3232	10.5367	10.4113	10.4902	10.5518	10.4109
Psmd13	ENSMUSG00000025487	ENSMUSG00000025487	0.0225069	0.99536	0.24167	0.986701	0.0807765	0.977471	0.254983	0.967914		10.9079	10.9113	9.9404	10.3704	10.4484	10.3678	10.3977	10.6442	10.653	10.6508	10.4368	10.0859	10.5099	10.9415	10.3679
Sdc4	ENSMUSG00000017009	ENSMUSG00000017009	0.111735	0.956106	0.182202	0.995681	0.00968484	0.996156	-0.0128709	0.995331		9.12548	9.18922	9.80672	9.24718	9.44582	9.56889	9.5689	9.37881	9.24332	9.16728	9.58575	8.85098	9.34565	8.94815	9.55023
Akt1	ENSMUSG00000001729	ENSMUSG00000001729	-0.0439148	0.991488	-0.0144929	0.995681	0.105304	0.9604	-0.197767	0.9781		8.843	9.05565	9.62953	9.35148	9.43907	9.46193	9.3291	9.20413	8.75572	9.20197	9.21158	9.2917	9.64505	8.78218	9.24057
Top2a	ENSMUSG00000020914	ENSMUSG00000020914	-0.106494	0.915114	-0.0806827	0.995681	-0.0356822	0.985028	-0.0883451	0.98912		10.5015	10.5441	10.0029	10.478	10.4596	10.4202	10.31	10.3845	10.5008	10.4935	10.5121	10.3242	10.3972	10.5051	10.5083
Pdia6	ENSMUSG00000020571	ENSMUSG00000020571	0.0198735	0.993093	-0.151069	0.995114	-0.00400717	0.999106	-0.267376	0.884634		9.34333	9.37612	9.62196	9.54428	9.9247	9.6741	9.45091	9.41829	9.50892	9.4607	9.50137	9.82514	9.69745	9.08667	9.46012
Phb2	ENSMUSG00000004264	ENSMUSG00000004264	-0.122883	0.934467	-0.125445	0.995681	0.018206	0.989792	-0.196109	0.967914		9.08207	9.22157	9.67651	9.39931	9.52019	9.71669	9.51504	9.41395	9.04025	9.49655	9.3779	9.55943	9.77752	9.31604	9.28374
Psmc3	ENSMUSG00000002102	ENSMUSG00000002102	-0.296274	0.630356	-0.0852571	0.995681	-0.261103	0.649444	0.08536	0.990293		10.3557	10.3471	9.78883	10.0728	10.0015	10.2108	10.3859	10.442	10.4987	10.3565	10.2786	10.162	10.2932	10.6818	10.4314
Glg1	ENSMUSG00000003316	ENSMUSG00000003316	-0.25427	0.721829	-0.181279	0.974416	-0.258745	0.678885	-0.216114	0.950349		10.2288	10.2279	9.79668	10.2843	10.3843	10.2592	10.3201	10.2055	10.5153	10.2935	10.4871	10.0077	10.1451	10.4172	10.4627
ENSMUSG00000120992	ENSMUSG00000120992	ENSMUSG00000120992	-0.111318	0.951761	0.0221145	0.995681	0.0109086	0.995434	0.159674	0.98795		9.90056	9.81183	9.49112	9.42185	9.64862	9.67034	9.90585	9.83932	9.3991	9.76909	9.27999	10.0164	9.68539	10.2058	9.58921
Pdap1	ENSMUSG00000029623	ENSMUSG00000029623	-0.084899	0.956106	0.0550054	0.995681	-0.0515489	0.984334	0.137481	0.981523		10.558	10.472	10.1004	10.1548	10.2697	10.3229	10.2803	10.5407	10.483	10.5037	10.3573	10.1114	10.2424	10.7691	10.3489
Nrp1	ENSMUSG00000025810	ENSMUSG00000025810	-0.149303	0.899386	-0.450938	0.34858	-0.402092	0.340196	-0.304603	0.780388		8.9833	9.07348	9.32254	9.47207	9.39324	9.45539	9.40511	9.37659	9.79396	9.47022	9.43516	9.81897	9.08744	9.20591	9.53139
Mapre1	ENSMUSG00000027479	ENSMUSG00000027479	-0.0416107	0.970806	-0.0749851	0.995681	-0.106174	0.887918	0.0205308	0.993307		9.99524	9.83083	9.94647	9.92507	9.94866	9.84073	9.97017	9.96163	10.1562	10.0191	9.99453	9.98914	9.78238	10.0378	10.0673
Tnfaip2	ENSMUSG00000021281	ENSMUSG00000021281	0.249576	0.751814	0.251562	0.880056	0.39193	0.345622	0.35543	0.683954		9.31861	9.35002	9.80338	9.21436	9.18309	9.08043	9.11043	9.14783	9.11571	9.25801	9.51425	8.97385	9.25764	9.125	9.40369
Arid5b	ENSMUSG00000019947	ENSMUSG00000019947	-0.242475	0.825587	-0.358373	0.750335	-0.236912	0.82338	-0.0992052	0.990293		9.29029	9.1154	9.2144	9.28455	9.43002	9.19749	9.29298	9.38103	9.63586	9.22914	9.44288	9.92737	9.03682	9.66895	9.56677
Eif3h	ENSMUSG00000022312	ENSMUSG00000022312	0.209537	0.804361	0.159874	0.993883	0.0614797	0.968258	0.296135	0.759889		10.1884	10.2022	9.94647	9.87578	9.78085	9.79999	9.86337	10.1269	10.1536	9.85444	10.0499	9.95578	9.66273	10.24	9.74451
Nop58	ENSMUSG00000026020	ENSMUSG00000026020	0.188275	0.782563	-0.101078	0.995681	0.225143	0.645855	0.416719	0.165049		9.50544	9.32939	9.6383	9.01914	9.10848	9.13333	9.14124	9.28465	9.39462	9.56389	9.5069	9.72174	9.20794	9.46492	9.2534
Cdk1	ENSMUSG00000019942	ENSMUSG00000019942	-0.0152325	0.995885	-0.130232	0.995681	-0.0739412	0.988899	-0.192897	0.990293		8.21827	8.34128	9.44615	8.95437	8.95291	9.02257	9.20823	8.74397	8.54135	8.98805	8.68237	9.0475	9.24831	8.11513	8.82183
Wwc2	ENSMUSG00000031563	ENSMUSG00000031563	-0.156371	0.752943	-0.127683	0.949477	-0.231121	0.408615	-0.0355159	0.992218		9.73529	9.76651	9.83534	9.77435	9.80205	9.87547	10.0372	9.98518	10.013	9.83246	9.88684	10.0001	9.90183	10.0578	9.84287
Csrp1	ENSMUSG00000026421	ENSMUSG00000026421	-0.0976451	0.98042	0.110054	0.995681	-0.256636	0.917466	-0.138252	0.990293		10.1131	10.0805	8.92594	9.85345	9.87388	10.0722	9.83067	10.1674	10.1416	9.69795	9.50321	9.84593	9.53032	10.3691	9.63699
Rbbp4	ENSMUSG00000057236	ENSMUSG00000057236	0.154774	0.799255	0.000392102	0.999777	0.163334	0.736954	0.0338367	0.992218		9.67813	9.80117	9.8233	9.76052	9.68521	9.76336	9.54606	9.67702	9.59933	9.67837	9.82909	9.79903	9.77102	9.50035	9.56471
Sfpq	ENSMUSG00000028820	ENSMUSG00000028820	-0.141407	0.799255	-0.135441	0.926897	-0.0487852	0.9604	-0.118236	0.967914		9.76074	9.72649	9.87405	9.84752	9.88551	9.99462	9.74468	9.82796	9.94259	9.89175	9.9451	9.94221	9.93421	9.90019	9.96334
Flnb	ENSMUSG00000025278	ENSMUSG00000025278	0.0932463	0.934467	-0.0683809	0.995681	0.168099	0.831321	0.124377	0.980471		9.51635	9.40458	9.64453	9.38791	9.32165	9.49847	9.33578	9.47138	9.26803	9.35984	9.54148	9.84106	9.31467	9.45493	9.52928
Prdx4	ENSMUSG00000025289	ENSMUSG00000025289	-0.385589	0.169051	-0.126979	0.993883	-0.439448	0.0717487	-0.356976	0.34365		9.48059	9.60914	9.59775	9.87461	9.90687	9.97797	10.2465	9.86176	9.8621	9.81015	9.5629	9.68962	10.0636	9.85985	9.91409
Snrpb	ENSMUSG00000027404	ENSMUSG00000027404	-0.0395123	0.984235	0.0570523	0.995681	-0.0927237	0.943935	-0.145518	0.967914		9.32483	9.47335	9.78657	9.7091	9.66799	9.69833	9.71769	9.65149	9.54374	9.60768	9.47525	9.38155	9.81595	9.39135	9.51869
Ndufb9	ENSMUSG00000022354	ENSMUSG00000022354	-0.165951	0.829691	0.0475605	0.995681	-0.23984	0.613151	-0.00709113	0.995331		9.90886	9.98764	9.77526	9.92844	9.86887	9.89495	10.3391	10.0098	10.0145	9.88607	9.69001	9.94107	10.008	10.2271	9.91409
Pdlim1	ENSMUSG00000055044	ENSMUSG00000055044	-0.221853	0.804361	-0.419533	0.389287	-0.168365	0.861095	-0.0794553	0.990293		8.90243	8.85993	9.48835	9.13669	9.27187	9.19749	9.20581	9.26554	9.39462	9.47779	9.4582	9.67329	9.23419	9.47089	9.3159
Septin7	ENSMUSG00000001833	ENSMUSG00000001833	-0.141268	0.845339	-0.126602	0.993883	0.0765872	0.944146	0.0409866	0.992218		9.62367	9.68069	9.85912	9.60603	9.81253	9.63988	9.66743	9.52259	9.75778	9.87034	9.97869	9.70443	9.79526	9.92647	9.88305
Csde1	ENSMUSG00000068823	ENSMUSG00000068823	-0.146595	0.839079	-0.128147	0.993883	-0.0553169	0.965614	-0.217628	0.808228		9.73529	9.77307	9.8222	9.93964	10.0614	9.98405	10.0166	9.68604	9.77685	10.0912	9.83203	9.77755	9.89736	9.88984	9.98504
Szrd1	ENSMUSG00000040842	ENSMUSG00000040842	0.0665192	0.942735	0.0793647	0.995681	0.0736412	0.93837	-0.107503	0.967914		9.89011	9.7555	9.87934	9.98683	10.0122	9.84742	9.70915	9.84898	9.75078	9.77678	9.79932	9.71909	9.84566	9.67068	9.81198
Psma2	ENSMUSG00000015671	ENSMUSG00000015671	-0.19308	0.856634	-0.200902	0.97157	-0.027171	0.988899	-0.134104	0.98795		8.97541	8.90843	9.58225	9.3565	9.3314	9.30333	9.39662	9.22406	9.02872	9.4492	9.20705	9.51583	9.48334	9.29602	9.38282
Mbnl1	ENSMUSG00000027763	ENSMUSG00000027763	0.0474732	0.975744	-0.0710014	0.995681	0.0308666	0.988797	-0.257637	0.764796		9.23851	9.39042	9.63454	9.71432	9.72089	9.6418	9.47529	9.4797	9.25078	9.43954	9.5979	9.48029	9.56646	9.31161	9.27118
Dnaja2	ENSMUSG00000031701	ENSMUSG00000031701	0.0685868	0.963295	-0.112476	0.995681	0.0654973	0.968258	0.00148114	0.998729		9.21526	9.22157	9.62575	9.43773	9.42319	9.24633	9.29069	9.22159	9.40802	9.35984	9.4658	9.61749	9.48731	9.06054	9.33775
Vcp	ENSMUSG00000028452	ENSMUSG00000028452	0.127386	0.83728	-0.0341988	0.995681	0.0212975	0.988899	-0.0178079	0.993307		10.0432	10.0998	9.9241	10.0512	10.0437	10.0215	9.87258	10.0198	10.0995	9.99428	10.1641	10.0023	9.90925	9.84461	9.92856
Mfsd1	ENSMUSG00000027775	ENSMUSG00000027775	0.0391011	0.990185	-0.10198	0.995681	0.0669407	0.968258	-0.177985	0.967914		8.99505	9.25633	9.54142	9.53249	9.42319	9.43335	9.34021	9.27273	9.03161	9.4759	9.11096	9.54155	9.35872	9.03928	9.32808
Eif3e	ENSMUSG00000022336	ENSMUSG00000022336	0.185986	0.856634	-0.021721	0.995681	0.161098	0.880553	0.173781	0.967914		8.94343	9.09808	9.63078	9.16177	9.03578	9.0719	9.12335	9.20914	8.96969	9.2624	9.22731	9.36301	9.19341	8.90181	9.12803
Celf1	ENSMUSG00000005506	ENSMUSG00000005506	0.0466111	0.975433	0.0885438	0.995681	-0.000691784	0.999106	0.0307165	0.992218		9.52988	9.65012	9.84944	9.71171	9.66414	9.58896	9.80043	9.74759	9.49642	9.67343	9.6048	9.51583	9.75297	9.46093	9.6927
Srrm1	ENSMUSG00000028809	ENSMUSG00000028809	-0.151813	0.781145	-0.207672	0.689614	-0.0119719	0.989147	0.00377735	0.997547		9.60591	9.62131	9.74657	9.67867	9.60506	9.69092	9.61169	9.6404	9.76821	9.9663	9.85247	9.78644	9.81753	9.86439	9.75718
Tinagl1	ENSMUSG00000028776	ENSMUSG00000028776	0.53331	0.500897	0.353268	0.905396	0.542714	0.419395	0.162041	0.98912		8.49693	8.75334	9.50077	8.82507	8.87502	8.78572	8.42616	8.63278	8.27493	8.57326	8.70503	8.6375	8.95309	8.04222	8.21902
Cd63-ps	ENSMUSG00000085939	ENSMUSG00000085939	0.340137	0.891751	0.0553663	0.995681	0.161767	0.96331	0.288574	0.982436		9.91712	9.80544	9.24918	9.50562	9.36503	9.31301	9.02492	9.45881	9.94105	9.23585	10.1429	9.32692	8.93575	9.14503	9.80851
Slc48a1	ENSMUSG00000081534	ENSMUSG00000081534	0.135081	0.879839	0.169463	0.945237	0.0798775	0.944146	0.165597	0.966979		10.3991	10.5479	10.1121	10.2523	10.0774	10.2492	10.1751	10.3326	10.3306	10.3232	10.1594	10.0838	10.3023	10.3104	10.0497
Mfge8	ENSMUSG00000030605	ENSMUSG00000030605	0.171742	0.901021	0.215779	0.986701	0.140548	0.935999	0.228452	0.967914		11.0851	11.0475	10.1858	10.4811	10.6721	10.6334	10.3891	10.8626	10.7623	10.6566	10.6002	10.5726	10.5804	10.8786	10.4715
Pmepa1	ENSMUSG00000038400	ENSMUSG00000038400	-0.192006	0.812248	-0.279784	0.72441	-0.164148	0.840213	-0.0835812	0.990293		9.69263	9.62616	9.65815	9.76431	9.53925	9.89978	9.64968	9.75789	10.0333	9.92674	10.1118	9.75445	9.69401	9.84308	9.99882
Akap12	ENSMUSG00000038587	ENSMUSG00000038587	-0.00775537	0.995885	-0.346046	0.792289	-0.20168	0.860025	0.000695368	0.999042		8.99505	8.8434	9.52394	9.07099	9.21505	9.18436	9.24651	9.23147	9.5718	9.37208	9.77199	9.31995	8.855	9.2482	9.34975
Tnc	ENSMUSG00000028364	ENSMUSG00000028364	-0.311009	0.530492	-0.604153	0.013566	-0.24862	0.649333	-0.293624	0.746342		8.86877	9.15948	9.31943	9.3565	9.4503	9.47062	9.23941	9.38325	9.50892	9.66351	9.90652	9.61891	9.29213	9.43879	9.58516
Ddx21	ENSMUSG00000020075	ENSMUSG00000020075	0.0471261	0.977453	-0.0954157	0.995681	0.0928645	0.941735	0.223676	0.920649		10.1077	10.0137	9.91896	9.63663	9.84863	9.88036	9.73798	9.9452	10.0633	10.2708	10.2337	9.775	10.0121	9.98043	9.90599
Lman1	ENSMUSG00000041891	ENSMUSG00000041891	-0.285316	0.543111	-0.465208	0.0728282	-0.346898	0.275907	-0.268704	0.746342		9.42666	9.37325	9.30218	9.60321	9.64079	9.65709	9.54989	9.58366	9.96392	9.62483	9.93006	9.91121	9.61267	9.62861	9.70769
Rpl23a	ENSMUSG00000058546	ENSMUSG00000058546	0.0815388	0.964183	0.169283	0.995681	0.113605	0.944146	0.114118	0.990293		10.6648	10.6702	10.0412	10.2913	10.4849	10.3301	10.1813	10.577	10.3282	10.4766	10.3846	10.0547	10.4793	10.6356	10.0275
Gm12346	ENSMUSG00000083899	ENSMUSG00000083899	-0.162514	0.894787	0.0198923	0.995681	-0.125921	0.936376	-0.0499116	0.992218		9.9637	9.88636	9.74888	9.80161	9.87721	10.0622	10.25	10.1043	9.52746	10.0851	9.67205	9.75316	10.0965	10.1437	9.82751
Uqcrq	ENSMUSG00000044894	ENSMUSG00000044894	-0.128052	0.856634	-0.0254259	0.995681	-0.0777959	0.93969	-0.0569329	0.990293		9.98153	10.1102	9.89825	10.0502	9.97689	10.1296	10.0816	10.1713	9.96241	10.0512	10.036	9.97921	10.2377	10.1732	9.94448
Tln1	ENSMUSG00000028465	ENSMUSG00000028465	-0.23122	0.810534	-0.0599867	0.995681	-0.198538	0.840213	-0.0196698	0.993307		10.2952	10.0646	9.61563	10.0093	9.97845	10.1116	9.91776	10.2414	10.4325	9.97969	10.0935	10.1443	10.0025	10.4448	10.2538
Rpl37-ps1	ENSMUSG00000117711	ENSMUSG00000117711	-0.423105	0.555301	-0.0773853	0.995681	-0.319205	0.695749	-0.245052	0.966979		8.94747	9.13251	9.53338	9.25078	9.45477	9.6872	9.75136	9.73027	9.06019	9.44147	9.18879	9.28096	9.85492	9.67413	9.38516
Atp6v1f	ENSMUSG00000004285	ENSMUSG00000004285	0.155857	0.842331	0.0718035	0.995681	0.191229	0.753074	0.240919	0.781269		10.2204	10.4311	9.97148	9.95958	9.99848	9.97034	9.9773	10.1322	9.96089	10.2028	10.113	10.1164	10.0729	10.2224	9.8631
Tcf25	ENSMUSG00000001472	ENSMUSG00000001472	-0.122314	0.904898	-0.0184584	0.995681	-0.163065	0.840213	0.033817	0.992218		10.1747	10.1527	9.74773	9.95186	10.0122	10.0361	10.1911	10.2353	10.1615	10.0048	9.93418	10.2024	9.95158	10.41	10.0644
Rtn3	ENSMUSG00000024758	ENSMUSG00000024758	0.0430395	0.976231	-0.159658	0.938299	-0.168043	0.782947	-0.124595	0.967914		9.5027	9.7687	9.57705	9.78681	9.71904	9.72215	9.60618	9.80167	9.93489	9.64346	9.76431	9.91237	9.60354	9.57977	9.54606
Srsf3	ENSMUSG00000071172	ENSMUSG00000071172	-0.00324407	0.997908	0.0545797	0.995681	0.101172	0.929138	-0.0365067	0.992218		9.3856	9.58944	9.79444	9.57764	9.76834	9.57091	9.40087	9.63483	9.46684	9.6094	9.45056	9.58585	9.73637	9.45493	9.61926
Ccl2	ENSMUSG00000035385	ENSMUSG00000035385	1.87738	0.360587	1.02388	0.926897	1.57018	0.515087	1.6549	0.684646		6.43904	6.15999	9.144	6.29308	6.2198	6.42515	6.22071	6.42754	6.52283	7.05249	7.37169	6.02655	6.4252	5.01358	6.46434
Uba1	ENSMUSG00000001924	ENSMUSG00000001924	-0.0226553	0.991488	0.0348182	0.995681	-0.0462165	0.968258	-0.00883367	0.994468		10.1113	10.2279	10.0048	10.1267	10.0422	10.1978	10.1297	10.2883	10.0548	10.0949	10.1594	9.98253	10.1017	10.2306	10.0745
Serp1	ENSMUSG00000027808	ENSMUSG00000027808	0.0686816	0.961849	0.214212	0.899617	0.125019	0.909275	-0.0305085	0.993165		9.71885	9.94178	9.80227	9.82112	9.88386	9.85738	9.69364	9.82959	9.56184	9.71406	9.4235	9.67603	10.0066	9.75457	9.44901
Arf4	ENSMUSG00000021877	ENSMUSG00000021877	0.160281	0.949762	0.275244	0.993883	0.152829	0.949598	-0.0351114	0.993307		8.5079	8.5645	9.42603	9.06077	8.85826	8.88647	9.04948	8.75772	8.36931	8.57679	8.53843	8.76626	9.09788	7.94844	8.944
Rcc2	ENSMUSG00000040945	ENSMUSG00000040945	0.173407	0.901021	0.0892027	0.995681	0.190405	0.880553	-0.103757	0.990293		9.03732	9.22795	9.54941	9.39931	9.43002	9.35347	9.30209	9.13736	8.8273	9.41017	9.05663	9.11757	9.53224	8.84476	8.86928
Arf6	ENSMUSG00000044147	ENSMUSG00000044147	0.230943	0.74738	0.116464	0.995681	0.206065	0.782161	0.173718	0.967914		9.70937	9.75771	9.83643	9.63663	9.65446	9.49422	9.23466	9.68963	9.72245	9.74576	9.80981	9.37315	9.49523	9.59442	9.52928
Eif4h	ENSMUSG00000040731	ENSMUSG00000040731	0.0333228	0.991488	0.0233144	0.995681	0.0862696	0.9604	-0.0999744	0.990293		8.95551	9.18266	9.60289	9.32951	9.32897	9.47278	9.36434	9.15304	9.04311	9.2863	9.08405	9.37988	9.45318	8.90768	9.32322
Hspa4	ENSMUSG00000020361	ENSMUSG00000020361	-0.157998	0.835614	-0.175666	0.922954	-0.0912322	0.937415	-0.0943554	0.98912		9.38857	9.54923	9.65692	9.5516	9.8038	9.53204	9.67271	9.6404	9.57577	9.74105	9.57876	9.81152	9.69573	9.83077	9.54815
Cct7	ENSMUSG00000030007	ENSMUSG00000030007	0.086502	0.923579	0.0715848	0.995681	0.0654493	0.951503	0.149336	0.964166		10.2469	10.2215	10.0412	10.022	10.0273	10.014	10.2734	10.1083	9.90842	10.1493	10.1571	9.98474	10.008	10.0827	10.1574
Ctnna1	ENSMUSG00000037815	ENSMUSG00000037815	0.116436	0.923226	-0.0593316	0.995681	0.00896869	0.994893	-0.0203168	0.993307		9.14318	9.33827	9.58614	9.51912	9.28197	9.36283	9.35123	9.09739	9.59933	9.27331	9.59963	9.40317	9.31467	9.21067	9.24315
Slc20a1	ENSMUSG00000027397	ENSMUSG00000027397	0.26169	0.721829	0.0684447	0.995681	0.468984	0.155023	0.185033	0.967914		9.33719	9.52869	9.60289	9.3261	9.43002	9.16844	9.05219	9.10008	8.93307	9.55676	9.39393	9.32518	9.35655	9.45893	8.80799
Psmb1	ENSMUSG00000014769	ENSMUSG00000014769	0.0815627	0.943939	0.105321	0.995681	-0.00796378	0.994893	0.0827023	0.990293		9.83453	9.97251	9.82659	9.70254	9.84693	9.83738	9.86952	10.0312	9.74375	9.66517	9.63377	9.99024	9.80803	9.9046	9.66799
Col5a2	ENSMUSG00000026042	ENSMUSG00000026042	0.0793902	0.963295	-0.0215442	0.995681	-0.0171042	0.989841	-0.10643	0.990293		9.24836	9.32344	9.59647	9.44875	9.50734	9.56281	9.41564	9.27034	9.55383	9.25581	9.38393	9.60319	9.29667	8.88105	9.68135
Cebpd	ENSMUSG00000071637	ENSMUSG00000071637	0.0318769	0.992303	-0.117437	0.995681	-0.149371	0.93969	-0.0996644	0.990293		8.91897	8.75334	9.40415	9.22538	9.06237	9.17642	9.01663	9.11083	9.45398	8.79551	9.22731	9.42772	9.09006	8.50054	9.36165
Pfn1	ENSMUSG00000018293	ENSMUSG00000018293	0.229214	0.956106	0.349209	0.995681	0.351582	0.916943	-0.0992933	0.992676		8.05576	8.25014	9.33029	8.79579	8.7314	8.76117	8.6099	8.29387	7.97816	8.40479	8.18029	8.36329	8.92406	7.27866	8.64227
Nr2f2	ENSMUSG00000030551	ENSMUSG00000030551	-0.110241	0.948615	-0.245314	0.926897	-0.166177	0.902465	0.0272331	0.993307		9.89639	9.68534	9.27993	9.67063	9.60506	9.55467	9.55562	9.86335	9.96241	9.68493	9.97869	9.96475	9.33686	9.95796	9.87477
Gsto1	ENSMUSG00000025068	ENSMUSG00000025068	-0.294515	0.428193	-0.387971	0.18044	-0.292095	0.392178	-0.158297	0.966979		9.05614	9.24063	9.47021	9.51912	9.36027	9.4042	9.61901	9.6142	9.45182	9.66185	9.69001	9.626	9.63792	9.44284	9.61131
Atpif1	ENSMUSG00000054428	ENSMUSG00000054428	-0.261898	0.398966	-0.208493	0.748611	-0.294412	0.247343	-0.161018	0.937456		9.51907	9.5131	9.53069	9.78059	9.61308	9.63988	9.89986	9.74069	9.79736	9.75669	9.59963	9.81897	9.71281	9.88538	9.74087
Luc7l3	ENSMUSG00000020863	ENSMUSG00000020863	0.0027476	0.997891	-0.12009	0.991954	-0.0223832	0.988899	0.0408671	0.991778		9.69983	9.54923	9.69104	9.61444	9.63293	9.57896	9.5248	9.71274	9.76821	9.67508	9.75193	9.8712	9.57208	9.6568	9.70955
Krtcap2	ENSMUSG00000042747	ENSMUSG00000042747	-0.0391679	0.984235	0.110187	0.995681	-0.103767	0.93541	0.0671782	0.990293		10.2599	10.3382	9.87934	10.0677	10.1522	10.085	10.3987	10.2705	10.1349	10.1096	9.90652	10.1483	10.1185	10.411	10.0687
Nfix	ENSMUSG00000001911	ENSMUSG00000001911	-0.20696	0.714279	-0.204064	0.837499	-0.205226	0.678885	-0.083303	0.98912		9.72592	9.38186	9.51717	9.74401	9.62304	9.50905	9.71769	9.76471	9.77167	9.64009	9.70614	9.89017	9.68366	9.71491	9.85639
Lamb1	ENSMUSG00000002900	ENSMUSG00000002900	0.109557	0.929063	-0.163151	0.993883	0.0166311	0.989428	0.245	0.920649		9.42087	9.39893	9.51036	9.2933	9.1282	9.17642	9.32016	9.36092	9.59152	9.44727	9.74726	9.61321	8.92113	9.50035	9.51443
Rhoc	ENSMUSG00000002233	ENSMUSG00000002233	0.23359	0.865796	0.296665	0.925162	0.206853	0.889026	0.387419	0.817719		10.9865	10.8371	9.8634	10.2215	10.2441	10.289	10.0987	10.5377	10.6082	10.2914	10.4684	10.2582	10.1762	10.6689	10.3248
Dazap2	ENSMUSG00000000346	ENSMUSG00000000346	0.0608421	0.976231	0.0475736	0.995681	0.110758	0.944146	-0.207199	0.967914		9.13966	9.25007	9.52124	9.45656	9.54764	9.56281	9.36869	9.1991	9.03161	9.29918	9.26046	9.24826	9.67323	9.07888	8.89571
Hnrnpa2b1	ENSMUSG00000004980	ENSMUSG00000004980	0.393032	0.696376	0.281991	0.949477	0.420897	0.592646	0.029961	0.993307		8.59282	8.80975	9.44758	8.94994	9.01777	8.95613	8.77287	8.59882	8.36014	8.80156	8.59843	8.76626	9.02593	8.13028	8.54961
Eif4a1	ENSMUSG00000059796	ENSMUSG00000059796	0.164626	0.926955	0.220727	0.993883	0.447191	0.560859	0.140959	0.990293		8.32141	8.46533	9.43469	8.81538	8.60443	8.67365	8.60623	8.3219	8.24038	8.61162	8.6122	8.6431	8.7857	8.46113	8.76562
Hspb1	ENSMUSG00000004951	ENSMUSG00000004951	-0.121821	0.986159	0.295256	0.995681	0.286603	0.944146	0.303853	0.989259		7.27012	7.77975	9.31787	8.02603	7.99857	8.27327	8.46726	8.23122	7.49948	8.2365	8.14285	7.94504	8.58522	8.22273	8.72198
Psmb3	ENSMUSG00000069744	ENSMUSG00000069744	-0.0432807	0.977655	0.0387942	0.995681	-0.139088	0.865596	-0.139525	0.967914		9.22527	9.39893	9.6169	9.65033	9.56221	9.48139	9.72618	9.47554	9.48382	9.36801	9.41174	9.38991	9.64683	9.40595	9.34256
Eif3d	ENSMUSG00000016554	ENSMUSG00000016554	0.0205211	0.992787	0.0851936	0.995681	0.159401	0.850361	0.28051	0.768896		10.073	10.0681	9.8189	9.69727	9.8073	9.61855	9.98864	9.86811	9.6071	10.0074	9.90652	9.79149	9.9885	10.189	9.68135
Pip5k1a	ENSMUSG00000028126	ENSMUSG00000028126	0.053615	0.965853	0.0116127	0.995681	-0.00440332	0.996577	-0.0707401	0.990293		9.89011	10.098	9.89093	9.99759	10.073	10.0259	10.0055	9.98226	9.90842	10.0048	10.1275	9.68692	9.84721	10.0039	9.86812
Fbln2	ENSMUSG00000064080	ENSMUSG00000064080	-0.728245	0.0907729	-0.621993	0.326096	-0.476105	0.463383	-0.348046	0.920649		9.05614	8.74446	8.64924	9.28981	8.9934	9.20791	9.10523	8.84077	9.77857	9.42591	9.58923	9.29704	9.20069	9.43879	9.91247
Cct6a	ENSMUSG00000029447	ENSMUSG00000029447	0.119237	0.892449	0.0360736	0.995681	0.215505	0.639706	0.11986	0.971075		9.49995	9.53128	9.69705	9.48589	9.39324	9.50694	9.36434	9.46092	9.27292	9.65352	9.47901	9.50203	9.63792	9.43269	9.29867
Lxn	ENSMUSG00000047557	ENSMUSG00000047557	-0.605475	0.0820451	-0.558697	0.175679	-0.558554	0.118923	-0.545057	0.243167		8.51879	8.58453	8.86532	9.25078	9.21242	9.16577	9.30209	9.05905	9.29714	9.02469	8.87734	9.64426	9.16392	9.31161	9.3305
Ctsb	ENSMUSG00000021939	ENSMUSG00000021939	0.028966	0.991488	-0.0166787	0.995681	-0.108458	0.916966	-0.120473	0.980471		9.13613	9.2811	9.51988	9.56467	9.33626	9.42668	9.47529	9.35866	9.46898	9.23808	9.24066	9.5295	9.36953	9.20113	9.32078
Scpep1	ENSMUSG00000000278	ENSMUSG00000000278	0.214158	0.632143	0.0812276	0.995681	0.0106561	0.989792	-0.0474556	0.990293		10.0488	10.0063	9.81005	9.98467	9.99542	10.0259	9.90136	10.0522	9.8718	9.76445	9.92456	9.92507	9.75627	9.64101	9.82235
Emp3	ENSMUSG00000040212	ENSMUSG00000040212	-0.0926348	0.92103	-0.118104	0.993883	-0.0775364	0.943935	0.0198497	0.993307		10.0859	9.98952	9.81559	9.91489	9.89705	10.02	9.98015	10.073	10.0703	10.01	10.2753	9.94107	10.0623	10.1561	9.94289
Tpm3	ENSMUSG00000027940	ENSMUSG00000027940	-0.195229	0.664829	-0.188978	0.794365	-0.171501	0.69212	-0.0446749	0.990293		9.69263	9.70835	9.69945	9.73247	9.6833	9.8154	9.88173	9.92859	9.79906	9.96091	9.91903	9.78137	9.94292	9.97064	9.75898
Rasa1	ENSMUSG00000021549	ENSMUSG00000021549	0.170231	0.886208	-0.199403	0.974623	0.0314392	0.988899	0.252609	0.936745		9.5539	9.47335	9.48696	9.20325	9.26425	9.29358	9.1887	9.43549	9.74375	9.74262	9.93828	9.37652	9.05568	9.53492	9.3758
Mir99ahg	ENSMUSG00000090386	ENSMUSG00000090386	-0.0187368	0.995885	-0.826154	0.0606362	-0.132227	0.948444	-0.295884	0.964166		8.37635	8.16621	8.33152	8.7558	8.48717	8.49796	8.23472	8.00792	8.88595	8.79854	8.98175	9.4693	8.03153	8.20376	8.63837
Eif6	ENSMUSG00000027613	ENSMUSG00000027613	0.192201	0.701878	0.303835	0.347605	0.277781	0.308642	0.313455	0.33849		10.0675	10.2119	10.0393	9.6933	9.84353	9.84575	9.77283	9.95269	9.75603	9.89317	9.81428	9.70041	9.94581	9.97485	9.8189
Cryab	ENSMUSG00000032060	ENSMUSG00000032060	0.0934321	0.975744	-0.0363727	0.995681	0.125597	0.960819	0.0116763	0.996997		8.27077	8.38192	9.36694	8.74307	8.72771	8.80644	8.59143	8.42885	8.88276	8.71132	8.73992	8.95596	8.62544	8.09467	9.1336
Akr1a1	ENSMUSG00000028692	ENSMUSG00000028692	-0.393546	0.164145	-0.224147	0.82826	-0.39429	0.136605	-0.106006	0.98319		9.42087	9.57199	9.47442	9.62696	9.48785	9.66468	10.0386	9.7613	9.83258	9.81314	9.63545	9.68556	9.63075	9.93944	10.0453
Nufip2	ENSMUSG00000037857	ENSMUSG00000037857	0.0546588	0.961849	0.0665472	0.995681	0.0532176	0.964332	0.0442838	0.991778		9.91093	9.86808	9.7978	9.92619	9.86215	9.63216	9.82277	9.82959	9.76126	9.89458	9.83643	9.63446	9.74636	9.87342	9.78749
Rpl35-ps1	ENSMUSG00000080855	ENSMUSG00000080855	-0.210115	0.843611	0.178513	0.993883	-0.11542	0.941813	-0.0649189	0.992218		9.80368	9.9553	9.54409	9.78432	9.83327	9.89978	9.88628	10.0867	9.66593	9.83835	9.49766	9.42284	10.0569	10.2516	9.55645
Id2	ENSMUSG00000020644	ENSMUSG00000020644	0.00530898	0.995885	0.130408	0.993883	0.0837936	0.93969	0.0376903	0.992218		9.85616	9.89039	9.81338	9.80774	9.90524	9.72759	9.87868	9.83608	9.57379	9.75202	9.7457	9.67055	9.96161	9.93944	9.6133
Vdac2	ENSMUSG00000021771	ENSMUSG00000021771	0.108628	0.897643	-0.0962729	0.995681	0.0613788	0.956453	-0.00609499	0.995872		9.24836	9.34709	9.54409	9.46123	9.3674	9.35816	9.39022	9.27273	9.32567	9.56744	9.38594	9.50203	9.37597	9.29602	9.16924
Gnb1	ENSMUSG00000029064	ENSMUSG00000029064	0.0222873	0.991488	0.157265	0.938299	-0.0340824	0.985028	-0.0176696	0.993307		10.003	10.1494	9.92307	10.0241	10.1889	9.90459	9.99568	10.1427	10.0376	9.88607	9.95863	9.75833	10.0742	10.0774	9.84626
Clta	ENSMUSG00000028478	ENSMUSG00000028478	0.0322271	0.983661	0.0538553	0.995681	-0.00115899	0.999106	0.0656165	0.990293		10.1381	10.2918	9.94748	10.0584	10.0137	10.1158	10.0656	10.2608	10.0534	10.1023	10.0762	10.0463	10.0094	10.183	10.0918
Usf2	ENSMUSG00000058239	ENSMUSG00000058239	-0.0397657	0.991075	0.0935494	0.995681	0.147644	0.91192	0.201823	0.967914		9.80813	9.7129	9.47582	9.48589	9.40252	9.51535	9.46315	9.69321	9.39462	9.57276	9.39592	9.73884	9.61449	10.0827	9.32565
Zc3h15	ENSMUSG00000027091	ENSMUSG00000027091	-0.288607	0.573957	-0.162731	0.974556	-0.163723	0.836711	-0.106544	0.98912		9.1537	9.30545	9.61563	9.383	9.62105	9.44221	9.6639	9.4672	9.48382	9.69795	9.46201	9.44866	9.64683	9.73323	9.6133
Anxa3	ENSMUSG00000029484	ENSMUSG00000029484	-0.086109	0.92372	-0.0875512	0.995681	0.0249847	0.988899	-0.029595	0.992218		9.57232	9.66901	9.71612	9.63525	9.63883	9.77917	9.77283	9.56815	9.53969	9.85444	9.75658	9.61036	9.81279	9.76432	9.6409
Tmem258	ENSMUSG00000036372	ENSMUSG00000036372	-0.208952	0.765356	0.00252222	0.997472	-0.275848	0.551367	-0.170374	0.966979		9.37964	9.25321	9.60289	9.54721	9.63293	9.60087	9.9281	9.47346	9.6566	9.43566	9.41959	9.40976	9.77102	9.47485	9.63503
2310022B05Rik	ENSMUSG00000031983	ENSMUSG00000031983	0.0667541	0.966607	0.0996403	0.995681	-0.106077	0.944146	-0.286663	0.854558		8.93938	8.88842	9.37446	9.41384	9.46809	9.23619	9.35342	9.16082	9.06019	8.84903	8.91669	9.18631	9.25997	8.81694	8.96287
Srsf1	ENSMUSG00000018379	ENSMUSG00000018379	0.307385	0.865435	0.131343	0.995681	0.387548	0.783347	0.29603	0.967914		8.19809	8.17945	9.25571	8.42068	8.42019	8.20728	8.43032	8.31262	8.01367	8.20947	8.45688	8.81421	8.72977	7.63092	8.45503
Snhg1	ENSMUSG00000108414	ENSMUSG00000108414	0.441292	0.333507	0.265435	0.888255	0.581205	0.0840941	0.574563	0.135581		8.84733	8.88842	9.42603	8.637	8.49587	8.40592	8.50722	8.41156	8.60868	8.84903	8.71143	8.90326	8.76293	8.34468	8.80101
Chmp4b	ENSMUSG00000038467	ENSMUSG00000038467	0.119186	0.91114	0.191652	0.938299	0.14222	0.881598	0.0783773	0.990293		10.3587	10.5364	10.0599	10.2095	10.137	10.3931	10.0855	10.306	10.1602	10.0726	10.3655	9.94334	10.135	10.1708	10.3175
Calm3	ENSMUSG00000019370	ENSMUSG00000019370	0.168442	0.835614	0.166315	0.956382	0.178131	0.796912	0.129545	0.974212		10.4064	10.4503	9.98922	10.099	10.2194	10.1701	10.0816	10.2451	10.0071	10.0651	10.1758	10.1364	10.2282	10.1914	9.93495
Hnrnpc	ENSMUSG00000060373	ENSMUSG00000060373	-0.159065	0.842331	-0.209326	0.879187	-0.0918833	0.93969	-0.218607	0.884634		9.07471	9.27186	9.43469	9.53545	9.46145	9.47278	9.50323	9.38768	9.18482	9.51138	9.44288	9.48965	9.61267	9.27117	9.38981
Nars	ENSMUSG00000024587	ENSMUSG00000024587	0.0918828	0.93164	0.159471	0.97081	0.210246	0.70591	0.304892	0.656049		10.0185	10.1443	9.94546	9.68268	9.76294	9.7545	9.79398	9.85538	9.83258	9.97435	10.0812	9.52496	9.90183	10.023	9.90761
Amotl1	ENSMUSG00000013076	ENSMUSG00000013076	0.208887	0.714422	0.00211228	0.997977	0.224935	0.629411	0.252596	0.746342		9.48892	9.34709	9.64329	9.2162	9.3745	9.15772	9.35123	9.19405	9.2875	9.6094	9.51242	9.37315	9.29893	9.19394	9.38749
Rpn1	ENSMUSG00000030062	ENSMUSG00000030062	-0.0228488	0.991488	-0.0386963	0.995681	-0.0296359	0.985028	0.0436838	0.990293		9.8583	9.91829	9.70064	9.78556	9.75752	9.79999	9.79882	9.85538	9.90684	9.789	9.81874	9.97256	9.77102	9.96783	9.79453
Eif3i	ENSMUSG00000028798	ENSMUSG00000028798	-0.0702062	0.97354	-0.0257749	0.995681	0.0181904	0.990254	-0.0465329	0.992218		8.71151	8.90046	9.42313	8.98928	9.20713	9.09173	9.24415	9.08108	8.72749	9.03499	8.85146	9.30589	9.30794	9.04729	8.98766
Iqgap1	ENSMUSG00000030536	ENSMUSG00000030536	0.00840714	0.995885	0.0534455	0.995681	0.00165247	0.999106	-0.00968699	0.994468		10.1969	10.2438	9.96651	10.1276	10.1132	10.1991	10.1195	10.1879	10.0981	10.1505	10.2303	9.84714	10.0939	10.2034	10.086
Aars	ENSMUSG00000031960	ENSMUSG00000031960	0.133233	0.894787	0.191553	0.922954	0.257537	0.613626	0.172226	0.966979		9.17452	9.33827	9.61309	9.24537	9.20182	9.21826	9.19116	9.19152	9.02293	9.34336	9.10853	9.14743	9.38452	9.30939	9.06829
Sptbn1	ENSMUSG00000020315	ENSMUSG00000020315	-0.240183	0.703125	-0.0550143	0.995681	-0.0718004	0.956453	-0.0308199	0.993165		10.173	10.2087	9.6838	10.0481	10.0628	10.0878	10.1899	10.0283	10.0981	10.1386	10.08	10.0515	10.1017	10.4356	10.2678
Chd4	ENSMUSG00000063870	ENSMUSG00000063870	-0.115124	0.902896	-0.037122	0.995681	-0.136829	0.861095	0.0797604	0.990293		10.2777	10.1477	9.87086	9.94076	10.099	10.0332	10.0454	10.286	10.3722	10.174	10.1734	10.0756	10.2211	10.3444	10.0789
Lasp1	ENSMUSG00000038366	ENSMUSG00000038366	-0.00755585	0.995885	-0.0458901	0.995681	-0.176688	0.897533	-0.165578	0.980471		8.85164	8.7084	9.31631	9.22171	9.09709	9.13879	9.09215	9.13473	9.26312	8.7081	8.98439	9.33905	9.24126	8.69653	9.00293
Kdelr1	ENSMUSG00000002778	ENSMUSG00000002778	0.0265244	0.992159	0.0659538	0.995681	0.0737263	0.968258	-0.130585	0.98912		9.53525	9.83083	9.43756	9.67466	9.78618	9.7545	9.517	9.69142	9.38109	9.4872	9.43709	9.69098	9.9313	9.54438	9.16924
Ncor1	ENSMUSG00000018501	ENSMUSG00000018501	-0.130003	0.860904	-0.251555	0.609845	-0.156906	0.794594	-0.163629	0.950349		9.58533	9.43524	9.39383	9.65033	9.63293	9.6166	9.60618	9.63483	9.63966	9.64682	9.66876	9.8374	9.39514	9.68444	9.70209
Pafah1b1	ENSMUSG00000020745	ENSMUSG00000020745	-0.115208	0.894787	0.00589169	0.995681	-0.0237238	0.988899	0.0491075	0.991349		9.75384	9.73995	9.7396	9.66929	9.62898	9.7844	9.76461	9.88699	9.64155	9.89458	9.68838	9.62033	9.96874	9.93656	9.6487
Tpr	ENSMUSG00000006005	ENSMUSG00000006005	-0.216115	0.81617	-0.538187	0.127487	-0.187383	0.840213	-0.0307074	0.993307		9.04111	9.199	9.04381	9.04426	9.18309	9.14964	9.09215	9.0282	9.64344	9.546	9.84666	9.47245	9.23182	9.22485	9.46234
Dbi	ENSMUSG00000026385	ENSMUSG00000026385	-0.0639518	0.952756	-0.066416	0.995681	-0.0861797	0.935999	0.00324662	0.997858		9.55655	9.63819	9.57052	9.61164	9.61707	9.52372	9.60986	9.76981	9.63776	9.53515	9.60996	9.80154	9.50702	9.80896	9.62322
Gm14892	ENSMUSG00000080825	ENSMUSG00000080825	-0.266247	0.959224	0.114587	0.995681	-0.175221	0.98263	-0.201021	0.991778		7.40539	7.82255	9.02673	8.42706	8.46519	8.48517	9.14884	8.05877	7.66492	8.54111	7.68337	8.09151	9.05032	7.83585	8.43264
Ryk	ENSMUSG00000032547	ENSMUSG00000032547	0.17731	0.90372	0.0117616	0.995681	0.0325866	0.988899	-0.0479311	0.992218		8.48031	8.76216	9.34108	8.94773	9.05944	8.87671	9.03862	8.88214	8.70956	8.77107	8.73364	9.16311	8.95021	8.44506	8.77988
Rangap1	ENSMUSG00000022391	ENSMUSG00000022391	-0.202133	0.814424	0.0766464	0.995681	-0.0918934	0.944146	0.0014639	0.998729		10.2729	10.1644	9.77979	9.96727	10.0658	10.2056	10.207	10.1828	10.1349	10.2209	9.90233	9.87359	10.1897	10.5282	10.1003
Dynll2	ENSMUSG00000020483	ENSMUSG00000020483	-0.138239	0.874736	0.0255223	0.995681	-0.170844	0.804705	-0.0916109	0.98912		10.0242	9.8742	9.80561	9.98142	10.0774	9.91735	9.93251	10.0466	10.2235	10.0813	9.89531	9.62033	10.0108	10.1071	9.99882
Fubp1	ENSMUSG00000028034	ENSMUSG00000028034	-0.026932	0.991488	-0.0688056	0.995681	0.0193412	0.988899	0.045175	0.992218		9.81698	9.98952	9.73142	9.74145	9.69846	9.9565	9.78588	9.71626	9.97146	10.01	9.95188	9.77882	9.87022	10.0324	9.70021
Hbegf	ENSMUSG00000024486	ENSMUSG00000024486	0.305193	0.836523	-0.0323621	0.995681	0.236283	0.887918	0.384785	0.920649		8.61837	8.52357	9.31943	8.38508	8.50451	8.58048	8.53455	8.46699	8.87955	9.1002	9.24729	8.14381	8.44104	8.62344	8.63837
Myo10	ENSMUSG00000022272	ENSMUSG00000022272	-0.220533	0.805075	-0.232568	0.913272	-0.153047	0.889026	0.132175	0.982436		9.08574	9.05565	9.39383	9.24357	8.90473	9.00475	9.05489	9.42476	9.51306	9.42395	9.56467	9.26652	9.23419	9.41835	9.56265
Kdelr2	ENSMUSG00000079111	ENSMUSG00000079111	0.0416259	0.991488	-0.128175	0.995681	-0.0647982	0.986683	-0.243169	0.973872		8.35827	8.54418	9.25571	8.91633	9.00564	9.13606	9.06295	8.73358	8.70956	8.79248	8.87448	9.04327	9.11596	7.94844	8.90875
Bicc1	ENSMUSG00000014329	ENSMUSG00000014329	-0.398947	0.590458	-0.214893	0.99204	-0.571929	0.157613	-0.323571	0.884184		9.51363	9.05205	8.92594	9.44404	9.58277	9.48354	9.63533	9.52861	10.0391	9.20881	9.37387	9.58002	9.12619	9.75783	9.76616
Dek	ENSMUSG00000021377	ENSMUSG00000021377	-0.0546712	0.973678	0.00533614	0.995681	0.111613	0.932952	-0.0162519	0.993307		10.1486	10.0893	9.67286	9.94299	9.99235	10.055	9.57644	9.96014	10.0333	10.0487	9.88543	9.98804	10.1172	10.1135	9.85975
Ppp1r12a	ENSMUSG00000019907	ENSMUSG00000019907	-0.0189596	0.991488	-0.0293931	0.995681	-0.0487292	0.968258	0.00772605	0.995331		9.61609	9.60914	9.54808	9.65577	9.59294	9.48996	9.62628	9.54654	9.73669	9.46261	9.6168	9.75962	9.57768	9.72493	9.51443
Psmb6	ENSMUSG00000018286	ENSMUSG00000018286	-0.120322	0.90469	0.0115069	0.995681	-0.225153	0.69212	0.00781779	0.995331		9.48615	9.34416	9.50077	9.49958	9.36265	9.44881	9.79882	9.73723	9.45182	9.4607	9.29926	9.53403	9.35655	9.79476	9.5123
Birc5	ENSMUSG00000017716	ENSMUSG00000017716	0.092715	0.915114	-0.0238389	0.995681	0.0618659	0.956453	-0.116607	0.967914		9.2871	9.43248	9.48418	9.60321	9.44357	9.51325	9.40087	9.45249	9.16654	9.4759	9.37185	9.44225	9.2944	9.35526	9.29371
Taf1d	ENSMUSG00000031939	ENSMUSG00000031939	-0.0295366	0.991488	-0.0889929	0.995681	0.0454198	0.985028	0.104475	0.989259		9.10394	8.86404	9.49388	9.12103	9.00868	9.11129	9.17388	9.20663	9.0345	9.28415	9.31618	9.22043	9.21034	8.96234	9.43557
Rpl7-ps8	ENSMUSG00000025922	ENSMUSG00000025922	-0.486527	0.595272	-0.0823029	0.995681	-0.32153	0.796821	-0.354838	0.936745		8.31518	8.68074	9.144	9.04219	9.09995	9.18962	9.45091	9.20663	8.36931	8.96129	8.6326	8.90792	9.54945	9.0658	9.0537
Ubn1	ENSMUSG00000039473	ENSMUSG00000039473	0.00813884	0.995885	0.0539789	0.995681	0.116546	0.916943	0.126076	0.980471		9.76532	9.73099	9.61436	9.49958	9.57868	9.65328	9.4468	9.76641	9.52951	9.66351	9.4865	9.78137	9.50898	9.97064	9.55852
Junb	ENSMUSG00000052837	ENSMUSG00000052837	0.822769	0.00644408	0.437047	0.578605	0.646883	0.0803474	0.74642	0.0297353		8.96748	8.68074	9.33647	8.21485	8.28118	8.3646	8.34468	8.47949	8.3276	8.56618	8.53121	8.67625	8.58892	7.79839	8.13831
Cp	ENSMUSG00000003617	ENSMUSG00000003617	-0.227146	0.853401	-0.715749	0.0567057	-0.446713	0.412774	-0.264211	0.95908		8.51336	8.32946	8.57809	8.87493	8.73508	8.59643	8.96016	8.53241	9.19774	8.88078	9.15393	9.4693	8.46139	8.61987	8.98458
Slc30a4	ENSMUSG00000005802	ENSMUSG00000005802	0.344124	0.802078	0.180268	0.995681	0.515653	0.502232	0.098084	0.990404		8.05576	8.29947	9.27672	8.48324	8.49152	8.69603	8.29532	8.12919	8.00193	8.42842	8.42994	8.57147	8.40788	7.95412	8.52865
Ifrd1	ENSMUSG00000001627	ENSMUSG00000001627	0.39188	0.523856	0.123495	0.995681	0.687264	0.024365	0.50937	0.342026		8.87302	8.99705	9.34721	8.50149	8.65967	8.60039	8.14637	8.55226	8.50439	9.11484	8.89995	8.88446	8.77273	8.94815	8.31517
Dazap1	ENSMUSG00000069565	ENSMUSG00000069565	-0.503973	0.296313	-0.501126	0.405609	-0.140914	0.935999	-0.00254472	0.998729		9.12904	9.03759	8.49774	8.91859	8.9934	8.80987	9.06831	8.88527	9.17179	9.44147	9.26482	9.49585	9.02866	9.78681	9.30114
Mprip	ENSMUSG00000005417	ENSMUSG00000005417	-0.00946401	0.995821	0.104953	0.993883	-0.0114379	0.989428	-0.0682472	0.98912		9.63373	9.56444	9.64826	9.76808	9.61507	9.66278	9.55562	9.69499	9.63206	9.5169	9.55223	9.4693	9.5226	9.72826	9.62124
Serpine1	ENSMUSG00000037411	ENSMUSG00000037411	0.786573	0.65568	0.300741	0.995681	0.646862	0.709931	0.7382	0.822377		7.29568	7.56461	9.12807	7.58165	7.4638	7.51384	7.80536	7.49556	7.5078	8.14436	7.8725	7.81214	7.63282	7.24192	7.51891
Itgb5	ENSMUSG00000022817	ENSMUSG00000022817	-0.0902094	0.948451	-0.14018	0.993883	-0.37612	0.304021	-0.518955	0.0708626		9.15021	9.12227	8.87383	9.64486	9.57868	9.46193	9.50914	9.44614	9.30432	8.88078	9.21834	9.4114	9.24126	9.00954	9.15564
Mmp14	ENSMUSG00000000957	ENSMUSG00000000957	-0.169863	0.865796	-0.348057	0.599637	-0.303469	0.57192	-0.140917	0.980471		9.0894	9.01931	9.06255	9.11907	9.09995	9.36049	9.3838	9.31518	9.37655	9.24919	9.15158	9.7336	9.20311	9.06054	9.39677
Rad21	ENSMUSG00000022314	ENSMUSG00000022314	0.0138003	0.993753	0.00647299	0.995681	-1.21976e-05	0.999997	-0.0684431	0.990293		9.9537	9.94952	9.70661	9.92281	9.95813	9.93471	9.74802	9.91332	9.94259	9.84129	9.90373	9.84593	9.91958	9.97345	9.65451
U2af2	ENSMUSG00000030435	ENSMUSG00000030435	0.154537	0.818415	0.0480957	0.995681	0.102504	0.910215	0.0446868	0.991778		9.97561	10.0484	9.81559	9.85818	9.86047	9.98556	9.72279	9.92555	9.87824	9.97702	9.97069	9.73884	9.89287	9.80896	9.66607
Lima1	ENSMUSG00000023022	ENSMUSG00000023022	-0.0140085	0.995885	-0.0695035	0.995681	0.00561516	0.996577	-0.162162	0.967914		9.06731	8.97825	9.26868	9.27397	9.27945	9.27139	9.15891	9.04511	9.11843	9.07796	8.89151	9.50357	8.96739	9.3423	9.04487
Rbbp7	ENSMUSG00000031353	ENSMUSG00000031353	0.177043	0.91874	-0.023981	0.995681	0.170154	0.932952	-0.0446934	0.993307		8.36432	8.4761	9.31004	8.80562	8.82067	8.87997	8.81168	8.60263	8.4275	8.83436	8.83395	8.77649	8.80811	8.08433	8.83896
Nme1	ENSMUSG00000037601	ENSMUSG00000037601	-0.0585129	0.961849	0.0957173	0.995681	0.026063	0.988899	0.0434684	0.992218		10.0451	10.2563	9.93227	9.97599	10.0832	10.055	10.0961	10.0757	9.99238	10.0436	10.1215	9.77373	10.2795	10.0827	10.0453
Dpysl3	ENSMUSG00000024501	ENSMUSG00000024501	-0.289237	0.490658	-0.223392	0.827087	-0.350356	0.234707	-0.0394572	0.992218		9.68298	9.51048	9.36241	9.58764	9.47691	9.60876	9.9281	9.79335	9.88144	9.78138	9.62191	9.81525	9.74304	9.63925	10.017
Ncaph2	ENSMUSG00000008690	ENSMUSG00000008690	-0.219066	0.843611	0.0293043	0.995681	-0.225619	0.831321	-0.100537	0.990293		9.21861	9.45442	9.3006	9.47053	9.3435	9.46411	9.95002	9.52259	9.04025	9.5169	9.20478	9.14743	9.43683	9.72659	9.45347
Ankrd17	ENSMUSG00000055204	ENSMUSG00000055204	0.0466809	0.968949	-0.0705806	0.995681	-0.0759964	0.944146	-0.0386905	0.992218		9.39745	9.40739	9.54675	9.45812	9.50734	9.51745	9.49729	9.59136	9.50269	9.46642	9.47336	9.62882	9.19827	9.41835	9.58719
Psat1	ENSMUSG00000024640	ENSMUSG00000024640	0.0296314	0.984235	0.160972	0.90814	0.0386025	0.980748	0.171846	0.920649		9.74227	9.65487	9.7232	9.52953	9.50087	9.57896	9.65503	9.74759	9.60127	9.54059	9.49209	9.60606	9.62354	9.8492	9.54189
Ppm1g	ENSMUSG00000029147	ENSMUSG00000029147	-0.171711	0.823498	-0.0519924	0.995681	-0.0931442	0.93969	-0.0561434	0.990293		9.22195	9.20872	9.44472	9.54281	9.24632	9.25138	9.44269	9.46302	9.26558	9.45112	9.38393	9.2148	9.46733	9.57793	9.35928
Nudt3	ENSMUSG00000024213	ENSMUSG00000024213	-0.0152238	0.994843	-0.176227	0.949518	0.126254	0.907779	-0.0822301	0.990293		8.8857	8.89244	9.33492	9.14639	9.14765	9.14151	8.86187	9.05349	8.89233	9.1882	9.1865	9.33387	9.20553	9.01772	9.00293
Trim28	ENSMUSG00000005566	ENSMUSG00000005566	0.00962856	0.995885	0.0575963	0.995681	0.0177542	0.988899	-0.0537675	0.990293		9.82139	9.86399	9.80004	9.7756	9.92147	9.94564	9.77119	9.81487	9.84413	9.86024	9.8217	9.62175	9.88686	9.93081	9.61529
Ubr4	ENSMUSG00000066036	ENSMUSG00000066036	-0.316925	0.714279	-0.0670963	0.995681	-0.153913	0.916943	0.107821	0.990293		9.74227	9.72424	9.13871	9.44561	9.34832	9.54648	9.51504	9.71098	9.87984	9.66683	9.58226	9.61891	9.43478	10.2224	9.85133
Ncam1	ENSMUSG00000039542	ENSMUSG00000039542	-0.291839	0.807196	-0.458986	0.619629	-0.281363	0.798868	-0.0932369	0.990293		8.87302	8.60919	8.8589	8.81781	8.97796	8.83698	8.88632	8.88214	9.372	8.89216	9.2517	9.51278	8.49336	9.20352	9.38749
Set	ENSMUSG00000054766	ENSMUSG00000054766	0.0865159	0.915114	0.0534846	0.995681	0.125609	0.840213	0.0547533	0.990293		9.72121	9.79042	9.74309	9.61304	9.70597	9.77217	9.5403	9.73027	9.60322	9.81015	9.64553	9.63446	9.73971	9.69637	9.55231
Rps2	ENSMUSG00000044533	ENSMUSG00000044533	0.211103	0.959224	0.0574344	0.995681	0.173297	0.968258	0.00948289	0.998278		7.5398	7.83096	9.15277	8.31112	8.38316	8.3646	8.27231	8.11324	8.18436	8.15856	8.22128	8.5115	8.48543	7.37511	8.36804
Atp6v0e	ENSMUSG00000015575	ENSMUSG00000015575	-0.102021	0.950131	0.0152922	0.995681	-0.00973486	0.994893	-0.204121	0.967914		9.11833	9.30846	9.35483	9.4314	9.3555	9.60876	9.40722	9.44189	8.92066	9.23362	9.22954	9.28813	9.70429	9.13003	9.19607
Niban2	ENSMUSG00000026796	ENSMUSG00000026796	-0.224157	0.752943	-0.264964	0.792289	-0.205413	0.780377	-0.2995	0.746342		9.00283	9.35295	9.37146	9.53987	9.54764	9.57292	9.49927	9.51856	9.35595	9.74576	9.55044	9.21668	9.57395	9.46492	9.38981
Api5	ENSMUSG00000027193	ENSMUSG00000027193	0.319305	0.903694	0.156254	0.995681	0.295339	0.916966	0.0903621	0.992218		8.02553	8.06288	9.18904	8.43024	8.42476	8.49371	8.61357	8.06431	7.97816	8.5008	8.23023	8.41003	8.50908	7.48921	8.46389
Ndufa5	ENSMUSG00000023089	ENSMUSG00000023089	-0.0851843	0.965879	-0.0922597	0.995681	-0.096139	0.960819	0.260829	0.964166		9.75384	9.4186	9.07552	9.11116	9.18847	9.23619	9.26061	9.70744	9.59738	9.43954	9.4563	9.68012	9.16888	9.9423	9.33775
Rps3a3	ENSMUSG00000059751	ENSMUSG00000059751	-0.146385	0.951761	-0.0660051	0.995681	-0.167923	0.941735	-0.0287422	0.993307		8.12155	8.04853	9.17705	8.56362	8.49587	8.69233	8.91928	8.80812	8.39197	8.55906	8.38655	8.87735	9.05835	8.40823	8.55791
Rps25	ENSMUSG00000009927	ENSMUSG00000009927	-0.0337403	0.991488	-0.156715	0.993883	0.0245599	0.988899	0.0315862	0.993307		8.75822	8.87628	9.26706	8.98928	9.03875	8.84701	9.0974	8.90702	8.88914	8.89499	9.15158	9.3562	9.15396	8.98752	8.92488
Ly6e	ENSMUSG00000022587	ENSMUSG00000022587	0.243227	0.763717	0.343595	0.634826	0.217647	0.794594	0.287586	0.820119		11.0676	11.0063	10.3086	10.4834	10.5511	10.5922	10.5508	10.7058	10.5759	10.6074	10.4806	10.3629	10.6117	10.6946	10.4426
Prkar1a	ENSMUSG00000020612	ENSMUSG00000020612	-0.295721	0.615969	-0.158828	0.993883	-0.0870655	0.946219	-0.217739	0.939045		8.94747	8.86813	9.28153	9.22904	9.3192	9.2539	9.15891	9.26072	8.9787	9.06294	9.07165	9.45185	9.41196	9.26202	9.3569
Ext1	ENSMUSG00000061731	ENSMUSG00000061731	-0.0188305	0.995775	-0.205408	0.993883	-0.0223756	0.989147	-0.147308	0.98912		8.52421	8.51315	9.24426	8.99358	9.01474	8.86359	8.76958	8.80812	8.92377	8.99598	8.93597	9.11152	8.67507	8.55021	9.19075
Bnip2	ENSMUSG00000011958	ENSMUSG00000011958	-0.216411	0.751635	-0.162097	0.975477	-0.1242	0.907779	0.0265103	0.993307		9.62871	9.60669	9.36543	9.5384	9.50519	9.47924	9.71939	9.68604	9.56384	9.80564	9.60136	9.67329	9.51093	10.0244	9.66415
Cox5b	ENSMUSG00000061518	ENSMUSG00000061518	-0.0624477	0.979617	0.0800162	0.995681	-0.0101788	0.995754	-0.0511632	0.992218		8.62846	9.07348	9.31318	9.11314	9.0447	9.10573	9.29526	9.11351	8.66187	8.93404	8.81622	9.10748	9.39302	8.79491	9.04782
Rab5c	ENSMUSG00000019173	ENSMUSG00000019173	0.206108	0.843611	0.221169	0.949477	0.163327	0.897305	0.177451	0.967914		10.5698	10.5606	9.91278	10.1729	10.2247	10.1978	9.96444	10.3633	10.2804	10.2665	10.2414	9.93538	10.2341	10.3335	9.90761
Ywhaz	ENSMUSG00000022285	ENSMUSG00000022285	0.223897	0.613321	0.201579	0.800358	0.129669	0.840213	0.0687263	0.990293		9.8817	9.93594	9.77412	9.7756	9.88054	9.72397	9.6281	9.89323	9.66593	9.69633	9.71573	9.5727	9.58697	9.7216	9.60732
Ppp2r1a	ENSMUSG00000007564	ENSMUSG00000007564	0.143344	0.83728	-0.030619	0.995681	-0.0135914	0.989147	-0.0210223	0.993307		9.68782	9.63098	9.60927	9.64075	9.82294	9.50905	9.55372	9.71802	9.6899	9.61112	9.82022	9.57563	9.48135	9.50229	9.51443
Nudt4	ENSMUSG00000020029	ENSMUSG00000020029	-0.16547	0.860904	-0.266377	0.79702	-0.107899	0.936148	-0.111901	0.98912		9.07102	8.88842	9.26058	9.23632	9.20448	9.14964	9.10001	9.08108	9.38109	9.23362	9.37185	9.43903	8.98997	9.43879	9.28873
Dap	ENSMUSG00000039168	ENSMUSG00000039168	0.0134612	0.995456	-0.121077	0.995681	-0.0871804	0.943935	-0.246914	0.789972		9.13613	9.33827	9.32098	9.50562	9.68521	9.33457	9.26761	9.48797	9.30432	9.31617	9.40977	9.44064	9.45318	9.16969	9.12245
Oxct1	ENSMUSG00000022186	ENSMUSG00000022186	0.00558959	0.995885	0.125416	0.993883	0.0547203	0.964664	-0.00112051	0.998729		9.86898	9.95723	9.6692	9.87578	9.80205	9.8205	9.66036	9.89011	9.77512	9.54239	9.78724	9.77882	9.87932	9.75457	9.84457
Rpl14	ENSMUSG00000025794	ENSMUSG00000025794	-0.1585	0.804828	-0.0524126	0.995681	-0.142238	0.825116	0.0212842	0.993307		9.95971	9.7687	9.61436	9.79299	9.70972	9.77917	9.83224	9.90254	10.0319	9.81314	9.82909	9.86163	9.84412	10.0405	9.93016
H2-D1	ENSMUSG00000073411	ENSMUSG00000073411	0.568119	0.360587	0.344233	0.89063	0.587849	0.302677	0.235166	0.967914		8.90658	9.14268	9.22775	8.87726	8.95291	8.7647	8.70576	8.58732	8.21518	8.78334	8.59843	8.87973	9.09267	7.842	8.4053
Edf1	ENSMUSG00000015092	ENSMUSG00000015092	-0.295039	0.688024	-0.130069	0.995681	-0.179901	0.84798	-0.117755	0.98912		10.0563	9.8924	9.26221	9.82596	9.82466	10.0021	9.96157	10.0312	9.84577	9.86602	9.86689	9.96027	9.94003	10.2105	10.0245
Baz1b	ENSMUSG00000002748	ENSMUSG00000002748	-0.152123	0.851327	-0.0622265	0.995681	-0.1696	0.810474	0.0531037	0.990293		10.1521	9.97251	9.67651	9.8629	9.84863	9.95341	10.0643	10.148	10.1187	10.0308	10.0219	9.95802	9.87326	10.2271	10.156
Sf1	ENSMUSG00000024949	ENSMUSG00000024949	0.468576	0.595449	0.203765	0.995681	0.315713	0.786865	0.167355	0.98912		8.47472	8.59938	9.25733	8.66155	8.67123	8.65092	8.59885	8.3219	8.60481	8.5008	8.74929	8.61487	8.54765	7.666	8.68457
Wdr43	ENSMUSG00000041057	ENSMUSG00000041057	-0.017312	0.995456	-0.137409	0.995681	0.169321	0.883071	0.209335	0.967254		9.91093	9.53385	9.28792	9.36483	9.37685	9.42221	9.18378	9.41612	9.64721	9.789	9.79178	9.61178	9.40147	9.89724	9.49079
Gm5690	ENSMUSG00000118151	ENSMUSG00000118151	-0.161682	0.926242	0.00238415	0.999477	-0.011945	0.995434	-0.255289	0.967914		8.64347	8.80975	9.20093	9.07506	9.18847	9.22083	9.01109	9.13999	8.5454	9.1905	8.73992	8.74297	9.5031	8.93671	8.62658
Hdac7	ENSMUSG00000022475	ENSMUSG00000022475	0.00726691	0.995885	0.0218142	0.995681	-0.0190004	0.99086	0.323699	0.921332		9.81919	9.65249	9.12807	9.28455	9.31183	9.10294	9.20581	9.76301	9.70083	9.38623	9.53427	9.67329	9.08744	9.9046	9.54606
Lamtor1	ENSMUSG00000030842	ENSMUSG00000030842	-0.123659	0.922802	-0.0536727	0.995681	-0.0882822	0.956453	-0.226197	0.954733		9.02592	9.1291	9.36694	9.40255	9.36265	9.46411	9.39875	9.34962	9.04597	9.39025	9.26482	9.04327	9.58141	8.99306	9.29122
Vmp1	ENSMUSG00000018171	ENSMUSG00000018171	0.143529	0.951761	-0.365537	0.896556	0.0709884	0.985028	-0.24062	0.971075		7.89785	8.15286	8.9683	8.79085	8.69409	8.48944	8.48338	8.176	8.39197	8.6219	8.81622	8.91024	8.20565	7.82968	8.69213
Ppp3ca	ENSMUSG00000028161	ENSMUSG00000028161	0.0973895	0.919958	-0.0180817	0.995681	0.144522	0.840213	0.0257247	0.993307		9.46377	9.32344	9.53069	9.41705	9.50087	9.33457	9.35342	9.16341	9.37655	9.44727	9.62191	9.30413	9.3169	9.25051	9.46895
Cyp1b1	ENSMUSG00000024087	ENSMUSG00000024087	0.250665	0.843611	0.0952346	0.995681	0.0818388	0.975843	0.0248556	0.993307		8.70198	8.4761	9.19075	8.8347	8.76057	8.81329	8.62087	8.76794	8.84383	8.18193	8.78315	9.08913	8.52463	8.4165	8.77633
Atp5md	ENSMUSG00000071528	ENSMUSG00000071528	0.469808	0.860904	0.372224	0.995681	0.525329	0.824172	0.386933	0.977376		8.04073	8.09117	9.09568	7.9963	8.12171	8.22791	8.07902	7.91899	7.94176	7.94579	7.88389	8.48679	8.48145	6.86089	8.29545
Mcm3	ENSMUSG00000041859	ENSMUSG00000041859	-0.135733	0.83728	-0.0275462	0.995681	-0.146981	0.796912	0.0554609	0.990293		9.6854	9.70606	9.63955	9.51613	9.67567	9.67034	9.64968	9.9482	9.85396	9.67343	9.66711	9.76605	9.82226	9.87792	9.72806
Pls3	ENSMUSG00000016382	ENSMUSG00000016382	-0.414431	0.342002	-0.31915	0.730512	-0.311669	0.592646	-0.183366	0.967914		9.02973	9.05565	8.88651	9.15794	9.27693	9.07475	9.42611	9.19152	9.27048	9.2536	9.01838	9.5873	9.13381	9.66028	9.36165
Taldo1	ENSMUSG00000025503	ENSMUSG00000025503	0.067228	0.961849	0.0255686	0.995681	0.0483345	0.98083	0.0703577	0.990293		9.27109	9.45442	9.47442	9.32951	9.34591	9.32981	9.45704	9.43976	9.15333	9.51138	9.20931	9.40152	9.47935	9.41423	9.08848
Naa50	ENSMUSG00000022698	ENSMUSG00000022698	0.088816	0.934198	-0.00453389	0.995681	0.205195	0.70856	0.103584	0.98795		9.11115	9.20225	9.38343	9.11907	9.09709	9.2001	9.0816	9.12945	8.89233	9.09774	9.24288	9.38155	9.05568	9.29602	9.09705
Cnn2	ENSMUSG00000004665	ENSMUSG00000004665	0.065036	0.970229	0.0791019	0.995681	-0.0951104	0.951899	0.112859	0.98912		10.0582	9.75991	9.54675	9.6476	9.55599	9.84575	9.74802	9.80332	10.1078	9.69795	9.59963	9.8544	9.60537	9.4984	10.0453
Rdx	ENSMUSG00000032050	ENSMUSG00000032050	-0.111246	0.886208	-0.103113	0.993883	-0.101236	0.90486	0.0119044	0.993307		9.91093	9.84335	9.58355	9.79546	9.79853	9.70754	9.84321	9.88229	9.91625	9.83098	9.95188	9.86283	9.78723	9.96079	9.91893
Utp3	ENSMUSG00000070697	ENSMUSG00000070697	-0.175705	0.868287	-0.160786	0.993883	-0.110043	0.93969	0.177039	0.967914		9.68298	9.65012	9.31787	9.27042	9.42319	9.44221	9.67797	9.6478	9.66964	9.9956	9.6048	9.50049	9.5226	10.0284	9.58516
Cyb5r1	ENSMUSG00000026456	ENSMUSG00000026456	0.00439372	0.998971	0.20291	0.995681	0.238505	0.89539	0.471328	0.780388		9.85401	9.577	8.68597	8.98063	8.87502	9.07475	8.99712	9.18391	9.4191	9.16962	9.0054	9.51278	9.12108	9.92502	9.12524
Swi5	ENSMUSG00000044627	ENSMUSG00000044627	0.405654	0.703542	0.477975	0.682252	0.330178	0.774339	0.362769	0.920894		10.562	10.5209	9.47861	9.86407	10.0076	9.82728	9.60986	10.2475	9.87341	9.7981	9.96668	9.56976	9.72127	10.1842	9.60331
Phf5a	ENSMUSG00000061360	ENSMUSG00000061360	-0.194285	0.804361	-0.0922342	0.995681	-0.126907	0.904505	0.0510448	0.992218		9.94968	9.96106	9.6016	9.72731	9.76114	9.88362	9.75136	10.0661	10.0675	9.95955	10.0089	9.83006	9.84721	10.1998	10.0394
Taok1	ENSMUSG00000017291	ENSMUSG00000017291	0.0606221	0.965879	-0.149645	0.993883	0.0219821	0.988899	-0.127788	0.982436		9.32793	9.33827	9.25733	9.53397	9.4503	9.30576	9.0816	9.25346	9.49224	9.52423	9.44481	9.39655	9.19341	8.96516	9.52928
Tm9sf3	ENSMUSG00000025016	ENSMUSG00000025016	0.0286605	0.991488	0.0466143	0.995681	-0.0224823	0.989047	-0.0762729	0.990293		8.97145	8.75776	9.35483	9.10122	9.16412	9.13333	9.15891	8.9585	9.11298	8.92852	8.95499	9.13755	9.23182	8.68973	9.11122
Sf3b1	ENSMUSG00000025982	ENSMUSG00000025982	0.0631064	0.964705	-0.00662783	0.995681	0.0490045	0.981374	0.00153473	0.998729		9.01056	9.48672	9.49939	9.26865	9.35311	9.43335	9.47328	9.18136	9.24332	9.47401	9.29713	9.30413	9.27384	9.18912	9.40369
Dab2	ENSMUSG00000022150	ENSMUSG00000022150	0.196952	0.807273	0.0347055	0.995681	0.252798	0.649333	0.127533	0.980471		9.04488	8.95535	9.38492	9.08518	9.00868	8.96537	8.88935	8.90393	8.89867	9.27114	9.17495	8.87021	8.95309	9.04463	8.85252
Sfr1	ENSMUSG00000025066	ENSMUSG00000025066	0.0450666	0.977453	-0.15502	0.98619	0.0709057	0.956507	0.063241	0.990293		9.63623	9.44623	9.39383	9.44718	9.54135	9.29113	9.47731	9.39209	9.39686	9.67673	9.75037	9.50664	9.18365	9.64453	9.47991
Map2k3	ENSMUSG00000018932	ENSMUSG00000018932	0.0884769	0.972326	0.140612	0.995681	0.194736	0.916397	0.361373	0.926826		8.20485	8.11891	9.21608	8.27974	8.12732	8.35993	8.44274	8.52037	8.29911	8.46697	8.52758	8.43607	8.60364	8.1403	8.77277
Gm12152	ENSMUSG00000083662	ENSMUSG00000083662	-0.305677	0.860904	0.0197209	0.995681	-0.129795	0.961738	-0.285049	0.967914		8.00244	8.17945	9.02291	8.7659	8.69409	8.83025	9.0974	8.51229	8.0195	8.659	8.27418	8.4296	9.20069	8.50442	8.53707
Bex3	ENSMUSG00000046432	ENSMUSG00000046432	-0.211058	0.725135	-0.00558683	0.995681	-0.244159	0.592646	-0.0814256	0.990293		9.33103	9.40176	9.40268	9.51762	9.36265	9.49422	9.77447	9.59519	9.48171	9.51873	9.26482	9.36131	9.40777	9.77239	9.56471
Atp5d	ENSMUSG00000003072	ENSMUSG00000003072	-0.176088	0.836523	-0.123462	0.995681	-0.293241	0.520466	-0.0693947	0.990293		9.60079	9.64297	9.47021	9.47207	9.7041	9.73482	10.145	9.74932	9.64344	9.86169	9.6168	9.58875	9.72968	9.76432	9.74451
Cbx1	ENSMUSG00000018666	ENSMUSG00000018666	-0.286253	0.543111	-0.37558	0.326096	-0.236555	0.638028	-0.299679	0.664103		8.87302	8.95149	9.07368	9.21804	9.34109	9.25138	9.09478	9.20914	9.31147	9.29704	9.17263	9.53855	9.11596	9.37448	9.26865
Etf1	ENSMUSG00000024360	ENSMUSG00000024360	0.134098	0.862891	0.2009	0.843531	0.178625	0.752724	0.19672	0.892114		9.61609	9.88838	9.75466	9.49199	9.59497	9.59889	9.46923	9.65333	9.61097	9.65185	9.66216	9.34078	9.66799	9.60168	9.60131
Strn3	ENSMUSG00000020954	ENSMUSG00000020954	0.114573	0.93164	-0.387193	0.548009	-0.0189253	0.989147	-0.0411552	0.992218		8.82117	8.82246	8.99195	9.1072	8.77494	8.86359	8.75306	8.69481	9.20544	9.35779	9.39592	9.02622	8.73312	8.65173	8.91522
Stat3	ENSMUSG00000004040	ENSMUSG00000004040	-0.492133	0.145532	-0.323727	0.68434	-0.433041	0.234707	-0.496034	0.189859		8.94747	8.57455	8.99781	9.29679	9.20448	9.5258	9.50125	9.25831	9.06302	9.24476	8.9387	9.3182	9.34346	9.31383	9.3758
Kmt2e	ENSMUSG00000029004	ENSMUSG00000029004	-0.243859	0.441788	-0.258728	0.492639	-0.201814	0.583222	-0.076401	0.98912		9.44961	9.36458	9.31787	9.4314	9.49871	9.42445	9.60618	9.47554	9.64155	9.63332	9.54686	9.71111	9.55135	9.62327	9.67754
Brd4	ENSMUSG00000024002	ENSMUSG00000024002	-0.194929	0.801487	-0.0898429	0.995681	-0.186035	0.794594	-0.0989288	0.98912		9.63122	9.82452	9.41002	9.68001	9.75209	9.74559	9.93398	9.74587	9.74903	9.80112	9.63039	9.71378	9.7347	10.0551	9.63895
Aup1	ENSMUSG00000068328	ENSMUSG00000068328	-0.0557832	0.975337	0.0731095	0.995681	-0.0295389	0.988899	0.156821	0.967914		10.0108	9.86194	9.56264	9.62141	9.63293	9.73482	9.86183	9.98518	9.6844	9.84569	9.69001	9.70041	9.68366	10.183	9.70021
Ahnak2	ENSMUSG00000118667	ENSMUSG00000118667	-0.139953	0.893829	-0.00980962	0.995681	-0.0513595	0.980748	0.233559	0.893656		9.66593	9.71518	9.40121	9.4314	9.20713	9.44	9.5248	9.73549	9.67519	9.62823	9.58749	9.60319	9.49523	10.0053	9.65838
Zfp106	ENSMUSG00000027288	ENSMUSG00000027288	-0.431968	0.243757	-0.36442	0.557584	-0.367057	0.378049	-0.104064	0.98912		9.49995	9.49204	9.00945	9.36815	9.47691	9.49847	9.78751	9.51654	9.80751	9.75825	9.80232	9.55052	9.54183	9.95228	9.79979
Thoc2	ENSMUSG00000037475	ENSMUSG00000037475	-0.153285	0.829089	-0.387591	0.127708	-0.147353	0.828682	-0.00984602	0.994358		9.1537	9.21516	9.14927	9.18642	9.15316	9.20531	9.27457	9.19152	9.47536	9.50768	9.66381	9.49585	9.17874	9.34664	9.43782
Lmnb1	ENSMUSG00000024590	ENSMUSG00000024590	0.256786	0.72561	0.150929	0.993883	0.141913	0.907779	-0.0276386	0.993307		9.82359	9.7129	9.43036	9.73504	9.66606	9.66278	9.20581	9.72678	9.57972	9.37614	9.77658	9.34078	9.39302	9.48667	9.33292
Rpl37rt	ENSMUSG00000072692	ENSMUSG00000072692	0.0341011	0.991488	0.204175	0.948161	-0.0287135	0.988899	0.168948	0.967914		9.73295	9.66901	9.59002	9.5026	9.39324	9.58497	9.93398	9.6478	9.45398	9.50213	9.58923	9.27556	9.81911	9.27799	9.73722
Bcar1	ENSMUSG00000031955	ENSMUSG00000031955	0.969944	0.648929	0.460349	0.995681	0.765994	0.733707	0.59955	0.967914		7.33318	6.9747	8.95029	7.42472	7.35325	7.54705	7.25844	7.34893	7.23447	7.49443	7.70922	7.52722	7.68912	6.21468	6.97873
Hdlbp	ENSMUSG00000034088	ENSMUSG00000034088	-0.173574	0.810534	-0.0654904	0.995681	-0.120054	0.897533	-0.0336774	0.992218		9.84754	10.0699	9.62827	9.85818	9.8367	9.96881	9.9773	9.93466	10.0115	9.9582	10.0334	9.75833	9.98147	10.1561	9.93654
Arhgdia	ENSMUSG00000025132	ENSMUSG00000025132	-0.0470158	0.975744	0.0747909	0.995681	-0.0488761	0.977849	-0.0721423	0.990293		10.0318	9.99701	9.72438	9.94299	10.0122	10.0215	9.9558	10.0382	9.90999	9.91145	9.99059	9.61178	9.98147	10.1084	9.79277
Ift20	ENSMUSG00000001105	ENSMUSG00000001105	-0.535876	0.432553	-0.646091	0.326096	-0.571568	0.327574	-0.3794	0.884184		8.18447	8.07001	8.15066	8.66695	8.32577	8.51485	8.50722	8.8015	8.77654	8.44782	8.29139	9.3425	8.37394	8.87207	8.70713
Gnb2	ENSMUSG00000029713	ENSMUSG00000029713	0.519442	0.85565	0.434752	0.993883	0.376215	0.915919	0.00174514	0.999042		8.68274	8.63824	9.07737	8.76842	8.87169	8.79612	8.59143	8.42023	8.29911	8.20491	8.47958	8.45211	8.65401	6.50557	8.82183
Mcm2	ENSMUSG00000002870	ENSMUSG00000002870	0.270922	0.830667	0.11725	0.995681	0.248768	0.840213	-0.119148	0.990293		8.43502	8.58453	9.11915	8.91859	8.7927	8.89295	8.45505	8.64392	8.4054	8.59082	8.64269	8.67078	8.97023	8.07914	8.23463
Uaca	ENSMUSG00000034485	ENSMUSG00000034485	-0.0284646	0.991488	-0.391405	0.567091	-0.175009	0.868184	-0.115881	0.98912		8.94747	8.97445	8.97227	9.20511	8.97485	9.046	9.06295	9.03949	9.29954	9.29061	9.70934	8.9694	8.80493	9.08148	9.07698
Mapk3	ENSMUSG00000063065	ENSMUSG00000063065	0.120572	0.908642	0.137202	0.993883	0.186523	0.805451	-0.0379145	0.992218		9.66103	9.8742	9.62323	9.62696	9.83841	9.80857	9.43649	9.73549	9.41468	9.74105	9.61851	9.37652	9.73135	9.65155	9.40139
Rpl31-ps9	ENSMUSG00000094122	ENSMUSG00000094122	-0.174061	0.975744	0.207151	0.995681	-0.148782	0.985028	-0.324393	0.98912		7.68225	7.68084	8.82637	8.48935	8.15504	8.77525	8.86802	8.34028	7.39565	8.36452	7.64372	7.80216	8.94444	7.72709	8.08763
Sec62	ENSMUSG00000027706	ENSMUSG00000027706	0.100676	0.949762	-0.363225	0.604898	0.0741551	0.968258	-0.00587234	0.997547		8.65339	8.61408	8.88861	8.73538	8.79974	8.66611	8.65329	8.42454	8.85693	8.90625	8.99494	9.32692	8.79214	8.35332	8.70713
Lrrc58	ENSMUSG00000034158	ENSMUSG00000034158	0.183483	0.894787	0.296746	0.887573	0.241474	0.822717	0.150818	0.98795		10.4225	10.4088	9.71493	9.99114	10.1563	10.0405	9.66743	10.0633	10.1469	10.0022	10.0115	9.7257	10.0729	10.2745	9.68514
Rpn2	ENSMUSG00000027642	ENSMUSG00000027642	-0.0778862	0.951761	-0.148751	0.993883	-0.028247	0.988899	-0.158277	0.967914		9.12904	9.26256	9.07737	9.42663	9.16956	9.32742	9.34683	9.00822	9.17701	9.20426	9.22283	9.46614	9.37383	9.25051	9.05663
Hspd1	ENSMUSG00000025980	ENSMUSG00000025980	-0.102437	0.91046	-0.0303488	0.995681	-0.00425328	0.99666	-0.0403272	0.992218		9.32173	9.27495	9.466	9.37477	9.42547	9.40193	9.47529	9.39429	9.21055	9.50953	9.38994	9.2647	9.48334	9.58161	9.30608
Ostc	ENSMUSG00000041084	ENSMUSG00000041084	-0.279449	0.671206	-0.361347	0.535456	-0.229497	0.733707	-0.287942	0.769126		8.93532	8.77965	8.88651	9.13279	9.1254	9.20531	8.98018	9.15304	9.15068	9.15789	8.97909	9.49275	9.12364	9.35311	8.92809
Bsg	ENSMUSG00000023175	ENSMUSG00000023175	-0.106579	0.900548	-0.0152465	0.995681	-0.157693	0.796912	-0.195883	0.884184		9.42087	9.28417	9.44472	9.57333	9.49871	9.66846	9.39662	9.50436	9.71348	9.38824	9.4563	9.36131	9.58141	9.38294	9.50802
Gm13215	ENSMUSG00000081394	ENSMUSG00000081394	-0.436527	0.584126	-0.0119637	0.995681	-0.265315	0.824172	-0.178324	0.982436		8.42926	8.72203	9.09568	8.86556	9.11131	8.88647	9.43235	9.03386	8.52504	8.95045	8.6326	8.77903	9.44094	9.09184	9.07986
Tgm2	ENSMUSG00000037820	ENSMUSG00000037820	-0.173812	0.858148	-0.0339843	0.995681	-0.320919	0.503574	0.0332109	0.993165		9.4778	9.3961	9.31318	9.28981	9.36503	9.43113	9.58206	9.76471	9.78885	9.27331	9.44673	9.55201	9.15396	9.79476	9.67945
Eif3l	ENSMUSG00000033047	ENSMUSG00000033047	-0.083277	0.959224	0.029523	0.995681	-0.00730476	0.996313	-0.0190535	0.993307		9.13966	9.26256	9.44615	9.09723	9.16138	9.62051	9.35123	9.4672	9.04597	9.43371	9.16565	9.17282	9.43889	9.43879	9.23541
Ddx24	ENSMUSG00000041645	ENSMUSG00000041645	0.105846	0.943027	0.0961854	0.995681	0.124193	0.929138	0.242832	0.937456		9.82139	9.80331	9.61182	9.48436	9.3792	9.63988	9.49729	9.71098	9.65285	9.73317	9.88826	9.2647	9.3522	9.81678	9.71513
Rbp1	ENSMUSG00000046402	ENSMUSG00000046402	-0.18574	0.843611	-0.327984	0.668171	-0.397783	0.308642	-0.251823	0.907505		9.02209	8.79263	8.96631	9.26865	9.11978	9.14693	9.15639	9.17369	9.60322	9.03755	9.33082	9.37652	9.12874	8.89886	9.29371
Tmem50a	ENSMUSG00000028822	ENSMUSG00000028822	-0.12864	0.913731	-0.385391	0.501378	-0.266854	0.678885	-0.293983	0.78039		8.73505	8.93208	8.67383	9.19018	9.0298	8.98671	8.88632	9.23393	8.99655	9.04011	8.94415	9.45025	8.81129	9.03928	8.86595
Mgat4b	ENSMUSG00000036620	ENSMUSG00000036620	-0.157679	0.86569	0.0326374	0.995681	-0.172	0.833798	-0.142266	0.971075		9.19843	9.37325	9.39383	9.4074	9.44357	9.55058	9.60618	9.63483	9.2131	9.40422	9.27784	9.19397	9.63075	9.55565	9.23022
Tmpo	ENSMUSG00000019961	ENSMUSG00000019961	0.17953	0.842331	0.0902383	0.995681	0.134906	0.907779	-0.0530858	0.992218		8.83431	8.87628	9.24426	9.1751	8.93383	9.0489	8.82755	8.97624	8.80383	8.83436	8.98175	8.92641	8.93283	8.56887	8.95032
Fam111a	ENSMUSG00000024691	ENSMUSG00000024691	-0.277726	0.671206	-0.4403	0.259017	-0.0909247	0.944146	-0.176358	0.967914		8.64347	8.84755	9.02099	9.07911	9.11978	8.86688	9.03041	8.65864	9.09928	9.36189	9.29287	9.20915	9.03682	9.04995	9.28374
Slc4a7	ENSMUSG00000021733	ENSMUSG00000021733	-0.0542006	0.963295	-0.0193386	0.995681	0.0674686	0.950198	-0.00640712	0.995331		9.26786	9.35878	9.42892	9.37147	9.22816	9.47709	9.26761	9.31518	9.28508	9.39625	9.41567	9.31469	9.57208	9.35526	9.28624
Ccn2	ENSMUSG00000019997	ENSMUSG00000019997	1.14282	0.282351	0.851717	0.714309	0.744889	0.649333	0.691883	0.893656		8.29631	8.13937	9.01138	7.62114	7.98628	7.93357	7.88032	7.99057	7.4911	7.74711	7.51776	7.81214	7.47367	6.07546	8.05868
Ddx17	ENSMUSG00000055065	ENSMUSG00000055065	0.0119207	0.995885	-0.0820568	0.995681	-0.0252988	0.988899	-0.102339	0.989259		8.74899	8.87221	9.14047	9.11116	8.93062	9.06332	9.12335	8.86953	8.87634	8.94773	8.86589	9.21292	9.14644	8.84782	8.7476
Kars	ENSMUSG00000031948	ENSMUSG00000031948	0.193399	0.824077	-0.00464778	0.995681	0.140066	0.897305	0.0113051	0.994837		8.92308	9.01193	9.26058	9.1732	9.03279	8.98368	8.84013	9.11351	8.84712	9.07796	9.22731	8.93099	9.08744	8.7134	8.83213
Dhx15	ENSMUSG00000029169	ENSMUSG00000029169	0.00611101	0.995885	0.109443	0.993883	-0.0600345	0.956453	0.184954	0.884184		9.96569	9.92419	9.76499	9.66659	9.73382	9.70017	9.78913	10.0141	10.0174	9.80714	9.86258	9.64984	9.88987	9.93656	9.80328
Dynlrb1	ENSMUSG00000047459	ENSMUSG00000047459	-0.129297	0.961849	-0.152194	0.995681	-0.0389919	0.988899	-0.234047	0.980471		8.14985	7.92825	8.95632	8.8585	8.76057	8.28316	8.69887	8.11324	8.51682	8.58031	8.62922	8.51456	8.90339	7.93699	8.65393
Qsox1	ENSMUSG00000033684	ENSMUSG00000033684	-0.459117	0.0473414	-0.190803	0.89875	-0.341453	0.258762	-0.266618	0.746342		9.45529	9.39893	9.05695	9.54134	9.57458	9.59889	9.6971	9.60473	9.63396	9.43176	9.4078	9.63446	9.63434	9.85985	9.78572
Med13l	ENSMUSG00000018076	ENSMUSG00000018076	-0.048491	0.977398	-0.0173041	0.995681	-0.0868233	0.944146	0.120681	0.982436		9.53257	9.4517	9.51581	9.28806	9.34591	9.50271	9.46721	9.54456	9.73669	9.56922	9.61338	9.36131	9.26461	9.78681	9.54815
Rac1	ENSMUSG00000001847	ENSMUSG00000001847	0.00440076	0.997408	0.149112	0.995114	0.0470512	0.985028	0.0390623	0.992218		9.28072	9.37899	9.34415	9.32781	9.12259	9.42221	9.45296	9.31285	9.07427	9.37208	8.99231	9.17282	9.54183	9.41423	8.97532
Gm5805	ENSMUSG00000061848	ENSMUSG00000061848	0.0385781	0.991488	0.157964	0.995681	0.0959297	0.960819	0.0939778	0.990293		9.93146	9.95723	9.33184	9.67063	9.58073	9.7545	9.52869	9.88229	9.56783	9.80714	9.577	9.40976	9.76284	10.0551	9.24315
App	ENSMUSG00000022892	ENSMUSG00000022892	0.0471654	0.981107	-0.0643225	0.995681	-0.0422827	0.985028	-0.14997	0.974212		9.04488	9.01193	9.26221	9.22171	9.36027	9.20531	9.17636	8.98795	9.28992	9.04011	9.21383	9.27014	9.05032	8.73669	9.35452
Bmp4	ENSMUSG00000021835	ENSMUSG00000021835	-0.215324	0.963927	-0.832514	0.82826	-0.324134	0.93969	0.0268152	0.995331		8.01788	7.28743	7.07808	7.46868	7.37227	7.6191	7.39251	7.75051	8.23537	7.61604	7.74713	9.12159	7.01539	8.30071	7.57722
Atp6v0b	ENSMUSG00000033379	ENSMUSG00000033379	-0.168598	0.894787	0.0791752	0.995681	-0.1466	0.915919	0.0291314	0.993307		9.85401	9.75329	9.4925	9.55742	9.59699	9.85738	10.1039	9.83608	9.56184	9.86746	9.72368	9.21292	9.77265	9.97904	9.85975
Ubxn8	ENSMUSG00000052906	ENSMUSG00000052906	0.196844	0.828292	0.136418	0.995681	0.180276	0.838393	0.113946	0.98912		9.49995	9.53385	9.35178	9.39931	9.39324	9.24633	9.05219	9.4797	9.28508	9.18358	9.38393	9.39987	9.27614	9.51196	8.95347
Tspo	ENSMUSG00000041736	ENSMUSG00000041736	-0.124056	0.879839	0.103328	0.995681	-0.227154	0.590365	-0.0786478	0.989259		9.76303	9.81183	9.55736	9.73632	9.8073	9.8239	10.1117	9.80994	9.87019	9.66683	9.63714	9.51736	9.88385	9.90019	9.70955
Tpi1	ENSMUSG00000023456	ENSMUSG00000023456	0.0707306	0.976231	0.0862305	0.995681	0.153729	0.92795	-0.172672	0.981523		8.49693	8.45992	9.11197	8.91179	9.0268	8.75407	8.60254	8.61023	8.52094	8.70488	8.51298	8.70866	9.02866	8.22273	8.61867
Sar1a	ENSMUSG00000020088	ENSMUSG00000020088	0.0141188	0.993093	-0.0126347	0.995681	-0.0323962	0.985028	-0.00787812	0.995331		9.69023	9.71518	9.4814	9.58621	9.62898	9.69277	9.62628	9.76641	9.58169	9.5478	9.63377	9.73229	9.72632	9.61969	9.48427
Gm9843	ENSMUSG00000050299	ENSMUSG00000050299	0.24893	0.85565	0.403873	0.776298	0.185566	0.91226	0.480128	0.683954		10.3511	10.0734	9.52799	9.58764	9.40021	9.62829	9.51504	9.79668	10.1295	9.55497	9.99585	9.19397	9.55514	9.79	9.94606
Strap	ENSMUSG00000030224	ENSMUSG00000030224	0.180106	0.868296	0.116059	0.995681	0.232566	0.783183	0.0582354	0.992218		8.62846	9.01193	9.31004	8.83949	9.08849	8.94683	8.81487	8.9733	8.54135	8.95588	8.89433	8.85822	8.94444	8.7201	8.84575
Rad23b	ENSMUSG00000028426	ENSMUSG00000028426	0.273512	0.525098	0.15662	0.949518	0.272746	0.46251	0.247477	0.754098		9.23521	9.24693	9.38045	9.09122	9.11978	8.91855	9.03041	9.16341	8.85366	9.08293	9.19795	9.12759	9.069	9.10468	8.87594
Aamp	ENSMUSG00000006299	ENSMUSG00000006299	0.0603275	0.967079	-0.0714793	0.995681	0.0800093	0.956453	-0.0990272	0.989259		8.59797	8.90843	9.18733	9.06282	9.0653	8.94371	8.92814	8.82127	8.79025	9.01431	8.90555	9.06846	9.03682	8.69992	8.84575
Itpripl2	ENSMUSG00000095115	ENSMUSG00000095115	0.25537	0.833288	0.136215	0.995681	0.294337	0.754788	0.526751	0.448787		8.59282	8.29339	9.17705	8.1775	8.14402	8.34585	8.54227	8.47949	8.33229	8.56618	8.87163	8.34965	8.34357	8.50829	8.6147
Pdgfrb	ENSMUSG00000024620	ENSMUSG00000024620	0.172565	0.926955	-0.0074757	0.995681	-0.0309417	0.989047	-0.0390026	0.993307		8.21827	8.25014	9.05133	8.63975	8.62043	8.56435	8.7397	8.4159	8.6279	8.34809	8.53482	8.80924	8.47746	7.82347	8.75122
Pim3	ENSMUSG00000035828	ENSMUSG00000035828	0.325131	0.785622	0.278637	0.949518	0.423975	0.590365	0.21524	0.974212		8.43502	8.68074	9.13871	8.57515	8.62836	8.51904	8.54994	8.47949	8.0195	8.56262	8.5203	8.45211	8.94444	8.04755	8.24495
Rexo2	ENSMUSG00000032026	ENSMUSG00000032026	0.0325918	0.982765	-0.0220999	0.995681	0.0276272	0.988289	0.139572	0.966979		9.78576	9.59439	9.52259	9.45344	9.47691	9.55671	9.55943	9.66066	9.59933	9.6094	9.69487	9.66368	9.50506	9.74804	9.53979
Got2	ENSMUSG00000031672	ENSMUSG00000031672	0.112439	0.91302	-0.0458175	0.995681	0.0653783	0.961738	0.0527351	0.991778		9.42955	9.63098	9.32565	9.43931	9.39324	9.40193	9.2861	9.45881	9.4475	9.4872	9.55401	9.48809	9.31467	9.60891	9.08274
Rpl5	ENSMUSG00000058558	ENSMUSG00000058558	-0.260466	0.877391	-0.296397	0.97081	-0.114713	0.965507	-0.0691943	0.992218		8.07064	8.01939	8.91978	8.34521	8.4563	8.62004	8.92224	8.45439	8.05968	8.74934	8.31261	8.96717	8.75965	8.44506	8.77277
Eif3b	ENSMUSG00000056076	ENSMUSG00000056076	-0.212129	0.713349	0.0401755	0.995681	-0.168679	0.788654	0.0253379	0.993307		9.13966	9.2994	9.41732	9.2863	9.17228	9.34405	9.57079	9.48177	9.32331	9.17894	9.3979	9.17862	9.49523	9.44284	9.57701
Slc25a5	ENSMUSG00000016319	ENSMUSG00000016319	0.32995	0.830667	0.0559588	0.995681	0.237383	0.902359	-0.149633	0.990293		8.05576	7.78841	8.94828	8.58088	8.37376	8.57244	7.99719	8.1862	8.19985	8.13002	8.21678	8.54479	8.29905	7.47346	8.21378
Psmc2	ENSMUSG00000028932	ENSMUSG00000028932	0.126782	0.934198	-0.192833	0.993883	0.145387	0.922876	-0.124246	0.98912		8.38232	8.54418	8.99391	8.80317	8.76057	8.82349	8.70576	8.30328	8.54944	8.65233	8.90555	9.00898	8.82705	8.25995	8.49879
Mlf2	ENSMUSG00000030120	ENSMUSG00000030120	-0.0159728	0.993088	0.13814	0.984013	-0.0146786	0.989147	-0.0105775	0.993754		9.87323	9.63819	9.53069	9.74273	9.59699	9.73482	9.60986	9.76981	9.70988	9.57276	9.53065	9.53403	9.79205	9.75131	9.53979
Col6a3	ENSMUSG00000048126	ENSMUSG00000048126	0.376291	0.262983	0.106284	0.995681	0.26257	0.588666	0.172205	0.966979		9.22527	9.05923	9.26058	9.07911	9.01777	8.94371	8.71943	9.02252	9.01711	8.99598	9.05159	9.18631	8.80174	8.61629	8.99989
Ggnbp2	ENSMUSG00000020530	ENSMUSG00000020530	-0.088824	0.951761	-0.196767	0.940177	-0.042561	0.985028	0.107922	0.98912		9.17107	9.15613	9.2144	9.13084	9.08561	9.00176	9.10783	9.14261	9.40357	9.39025	9.4235	9.31645	8.87637	9.33142	9.52928
Cox7b	ENSMUSG00000031231	ENSMUSG00000031231	-0.272047	0.843611	-0.366056	0.868717	-0.290779	0.823213	-0.357514	0.920923		7.97897	8.14613	8.80872	8.74563	8.61644	8.79612	8.79241	8.45439	8.69869	8.54831	8.51298	9.05802	8.99277	8.19417	8.6147
Ltbp1	ENSMUSG00000001870	ENSMUSG00000001870	-0.0524876	0.976231	-0.12786	0.995681	0.0697971	0.965614	0.0323119	0.993165		9.74691	9.4158	9.19415	9.43773	9.36503	9.49209	9.39662	9.4797	9.30432	9.56389	9.55044	9.65816	9.21993	9.68101	9.60931
Sh3glb1	ENSMUSG00000037062	ENSMUSG00000037062	-0.00209993	0.99911	-0.118292	0.995681	-0.088585	0.944146	-0.172046	0.967914		8.76738	8.94376	9.25733	9.10521	9.16956	9.27387	9.16141	9.09468	9.04311	9.12933	9.13975	9.12159	9.1861	8.77577	9.0537
Txnl1	ENSMUSG00000024583	ENSMUSG00000024583	-0.0243871	0.991488	0.00498276	0.995681	0.0350914	0.985028	-0.0122278	0.993307		9.60846	9.51831	9.51172	9.55451	9.54764	9.57091	9.45908	9.56424	9.50684	9.69795	9.54865	9.35961	9.59988	9.6568	9.44231
Cks1b	ENSMUSG00000028044	ENSMUSG00000028044	0.146237	0.894787	0.0790736	0.995681	0.12043	0.926954	0.00240293	0.998729		8.71625	8.81824	9.23272	8.96756	9.00564	8.86359	8.84948	8.9101	8.72392	8.88363	8.76786	8.95371	8.9759	8.55396	8.85252
Aprt	ENSMUSG00000006589	ENSMUSG00000006589	0.0443233	0.980152	0.280359	0.733819	-0.00963512	0.994893	0.252526	0.847989		10.4946	10.4031	9.91896	10.0419	10.0046	10.0651	10.213	10.3889	10.2889	10.1193	10.0886	9.80279	10.197	10.3637	10.1656
Ndufa7	ENSMUSG00000041881	ENSMUSG00000041881	-0.00929549	0.995885	0.029012	0.995681	0.0520105	0.985028	-0.0399171	0.992218		8.843	8.97065	9.28153	9.00002	9.29946	8.94683	9.22271	8.9193	8.82064	9.05789	8.98704	9.01763	9.2944	8.86302	8.98458
Farsa	ENSMUSG00000003808	ENSMUSG00000003808	0.17705	0.894787	0.242171	0.948486	0.253076	0.796912	0.233307	0.966979		10.6611	10.6406	9.8255	10.0809	10.222	10.258	9.90734	10.2741	10.2937	10.1564	10.3583	10.0034	10.2163	10.4326	10.06
Emc10	ENSMUSG00000008140	ENSMUSG00000008140	-0.3209	0.721829	0.0541742	0.995681	-0.243612	0.824172	-0.0390117	0.993307		9.80813	9.73995	8.83947	9.63663	9.50303	9.5258	9.88477	9.6478	9.73846	9.58857	9.41763	9.3782	9.68366	10.0683	9.72806
Hes1	ENSMUSG00000022528	ENSMUSG00000022528	1.35407	0.00395106	1.25127	0.0151561	1.07084	0.0529562	1.00262	0.131842		8.06322	7.92825	8.88861	7.49321	7.28463	7.35412	7.44284	7.15485	7.33145	7.14097	7.08632	7.18726	7.54404	5.94442	7.19635
Tbca	ENSMUSG00000042043	ENSMUSG00000042043	0.0820596	0.949762	-0.0136962	0.995681	0.0618095	0.967123	-0.0446791	0.992218		9.60591	9.55939	9.37746	9.49655	9.55807	9.62051	9.5052	9.39429	9.45613	9.53878	9.51791	9.52648	9.7162	9.35741	9.16653
Sem1	ENSMUSG00000042541	ENSMUSG00000042541	0.234971	0.951127	0.163039	0.995681	0.206829	0.956453	-0.000170366	0.999918		8.20485	7.77103	8.98214	8.31457	8.45184	8.46793	8.18137	8.12389	8.31342	8.1058	8.1523	8.46798	8.64336	7.05339	8.4007
Septin11	ENSMUSG00000058013	ENSMUSG00000058013	0.00613919	0.995885	0.144232	0.97081	-0.00750967	0.994893	0.216349	0.815389		10.0011	9.87217	9.70781	9.64623	9.73382	9.55263	9.74301	9.89479	9.96089	9.77831	9.75968	9.61178	9.74304	9.98738	9.82407
Map1lc3a	ENSMUSG00000027602	ENSMUSG00000027602	-0.407923	0.301549	0.00868948	0.995681	-0.462113	0.153373	-0.338339	0.696296		9.41213	9.38472	9.06441	9.55742	9.66991	9.65328	9.92957	9.65149	9.65097	9.27331	9.52702	9.00246	9.538	9.65155	9.87975
Denr	ENSMUSG00000023106	ENSMUSG00000023106	-0.0841334	0.95249	-0.144384	0.993883	0.000355921	0.999531	0.0738271	0.990293		8.88149	8.66201	9.18904	8.91859	8.95921	8.69233	9.14884	8.83105	8.79706	9.02469	9.14449	9.06429	8.90339	9.08148	9.06538
S100a11	ENSMUSG00000027907	ENSMUSG00000027907	0.251247	0.725135	0.262557	0.82826	0.37549	0.34968	0.198184	0.964174		9.61862	9.66431	9.31474	9.41865	9.36027	9.23109	9.18624	9.28939	8.99951	9.27766	9.14922	9.38824	9.50898	9.33578	8.95975
Fbn1	ENSMUSG00000027204	ENSMUSG00000027204	-0.222983	0.836523	-0.187849	0.993883	-0.265604	0.749506	-0.116555	0.989259		9.50544	9.04845	8.95632	9.26509	9.31183	9.32981	9.39662	9.22654	9.6899	9.19969	9.29926	9.58875	9.0822	9.48077	9.61131
Lrpprc	ENSMUSG00000024120	ENSMUSG00000024120	-0.130882	0.940403	-0.204792	0.993883	-0.0175158	0.991573	0.216096	0.967914		9.29029	9.12227	8.66405	8.8323	8.85149	8.80301	8.82123	9.30819	9.01127	9.20197	9.05411	9.45345	8.88544	9.56498	8.96911
Eif3f	ENSMUSG00000031029	ENSMUSG00000031029	0.0768507	0.926242	0.223594	0.626836	0.0618419	0.945255	0.213442	0.746342		9.80813	9.90241	9.69945	9.58193	9.58888	9.59889	9.59324	9.81816	9.80075	9.56389	9.60824	9.56682	9.76612	9.73488	9.67373
Nipbl	ENSMUSG00000022141	ENSMUSG00000022141	-0.103518	0.918562	-0.0670806	0.995681	-0.0067671	0.995754	0.0308024	0.992463		9.69023	9.81607	9.449	9.64349	9.6833	9.54237	9.67095	9.61042	9.70265	9.73475	9.86689	9.54903	9.62715	9.93513	9.6927
Ttc3	ENSMUSG00000040785	ENSMUSG00000040785	-0.213286	0.72561	-0.135422	0.993883	-0.204697	0.716254	-0.063304	0.990293		9.3616	9.37325	9.16843	9.36649	9.31183	9.40872	9.48733	9.40306	9.6129	9.34129	9.36577	9.58148	9.37811	9.72991	9.39908
Rpl10a	ENSMUSG00000037805	ENSMUSG00000037805	-0.453809	0.714279	-0.238216	0.995681	-0.384486	0.771564	-0.275571	0.967914		7.93084	8.01201	8.81315	8.60359	8.61245	8.55622	9.24178	8.63278	7.92942	8.67884	8.23913	8.69794	8.74312	8.55021	8.97841
Bptf	ENSMUSG00000040481	ENSMUSG00000040481	-0.184666	0.753981	-0.160301	0.935382	-0.193131	0.695749	0.00489951	0.9973		9.39154	9.38472	9.35635	9.34138	9.457	9.31543	9.52286	9.46511	9.70808	9.71406	9.44673	9.43258	9.52646	9.66722	9.47991
Slc25a39	ENSMUSG00000018677	ENSMUSG00000018677	0.059633	0.977453	0.333022	0.782409	0.0362522	0.988899	0.207151	0.967914		10.3234	10.3818	9.62196	9.94187	9.73932	10.1075	9.96301	10.223	10.1254	9.94597	9.78116	9.69907	10.0782	10.2858	9.85639
Uqcr10	ENSMUSG00000059534	ENSMUSG00000059534	-0.095392	0.921466	0.00812115	0.995681	-0.132995	0.857243	0.0826579	0.98912		9.62115	9.61158	9.47721	9.47207	9.59699	9.38366	9.69537	9.81816	9.57972	9.69145	9.49952	9.48342	9.61267	9.83385	9.52505
Gars	ENSMUSG00000029777	ENSMUSG00000029777	0.0589974	0.969091	0.206229	0.92692	0.2199	0.767488	0.426118	0.34365		9.66838	9.81819	9.41002	9.15986	9.17228	9.30818	9.36652	9.61231	9.25573	9.49655	9.29287	9.49894	9.51093	9.82612	9.35928
Snx3	ENSMUSG00000019804	ENSMUSG00000019804	0.542857	0.812248	0.587211	0.914533	0.435463	0.857243	0.357648	0.980471		7.80301	7.77975	8.94626	8.09576	7.78805	7.91461	7.79248	7.87553	7.91697	7.59531	7.7028	7.83189	7.95898	6.68048	8.21902
Ndufa8	ENSMUSG00000026895	ENSMUSG00000026895	-0.113943	0.956106	-0.229271	0.993883	0.00419726	0.999106	-0.365591	0.859572		8.19129	8.29339	8.85461	8.91406	8.7497	8.87344	8.7296	8.50416	8.15286	8.74934	8.57403	8.80425	9.01221	8.27367	8.39608
Rbm8a	ENSMUSG00000038374	ENSMUSG00000038374	0.339118	0.587518	0.331274	0.689614	0.264228	0.69212	0.283929	0.850935		10.4639	10.3975	9.80783	9.92619	10.0303	9.93627	9.77119	10.0312	10.1282	9.89599	10.0436	9.80404	9.80166	10.1109	9.79277
Smc4	ENSMUSG00000034349	ENSMUSG00000034349	-0.215127	0.781145	-0.503744	0.0852496	-0.0290059	0.988899	-0.11424	0.98912		8.60309	8.90445	8.64676	8.90266	8.8447	8.75051	8.68848	8.52841	8.99655	9.06796	9.26482	9.3182	8.9759	8.84476	8.9815
Syncrip	ENSMUSG00000032423	ENSMUSG00000032423	0.0748663	0.94891	0.09426	0.995681	0.137605	0.843996	0.0824785	0.98912		9.27109	9.35002	9.34568	9.30547	9.1254	9.28376	9.12077	9.30585	9.12656	9.23138	9.14212	9.30942	9.40147	9.06054	9.26612
Sdc2	ENSMUSG00000022261	ENSMUSG00000022261	0.142233	0.930833	0.0178139	0.995681	0.139575	0.93969	-0.113384	0.990293		8.19129	8.35884	8.98411	8.7859	8.67889	8.55213	8.59514	8.40284	8.26022	8.31889	8.47206	8.80175	8.55902	8.15519	8.52442
Purb	ENSMUSG00000094483	ENSMUSG00000094483	-0.0909504	0.951761	-0.151886	0.993883	0.0010397	0.999106	0.168695	0.967914		9.22195	9.11884	9.19415	8.98496	9.11978	8.92488	9.03041	9.1215	9.36285	9.37614	9.27135	9.34078	8.83954	9.41217	9.47773
Cct5	ENSMUSG00000022234	ENSMUSG00000022234	0.018376	0.992303	0.126872	0.993883	0.0098852	0.994893	0.236046	0.78039		10.2037	10.2422	9.85267	9.79299	9.95498	9.86069	10.0221	10.1203	10.1416	10.0613	10.0613	9.80154	10.1261	10.1548	9.97268
Ctdnep1	ENSMUSG00000018559	ENSMUSG00000018559	-0.181925	0.915114	0.0337107	0.995681	-0.0431116	0.988899	-0.39979	0.827575		8.37635	8.68539	8.74981	9.05872	8.99953	8.97456	8.91036	8.68765	8.31342	8.56618	8.64269	8.53579	9.36953	8.50442	8.26536
Zmat2	ENSMUSG00000001383	ENSMUSG00000001383	-0.169732	0.888378	-0.0139677	0.995681	-0.305372	0.633986	-0.00485743	0.997635		9.72121	9.65012	9.20937	9.42504	9.64862	9.55263	9.84165	9.86653	9.82094	9.74262	9.38794	9.50664	9.41196	10.0418	9.59527
G3bp1	ENSMUSG00000018583	ENSMUSG00000018583	0.147838	0.903543	0.0707658	0.995681	0.0750536	0.968258	0.0934548	0.990293		8.86451	8.51837	9.15801	8.94551	8.68651	8.70342	8.67451	8.87585	8.85366	8.74934	8.78315	8.88683	8.83643	8.46512	8.8626
Cdkn1b	ENSMUSG00000003031	ENSMUSG00000003031	-0.175254	0.906036	-0.182188	0.995681	-0.0774802	0.977849	-0.297182	0.943986		8.57206	8.35884	8.58069	8.89807	8.7497	8.75407	8.62814	8.67322	8.44495	8.3686	8.24797	9.23163	8.63264	8.78537	8.62263
Glud1	ENSMUSG00000021794	ENSMUSG00000021794	0.131871	0.951761	0.162377	0.995681	0.137392	0.944146	0.0169477	0.994837		8.28997	8.29947	9.04945	8.63424	8.6519	8.45923	8.69887	8.47533	8.17393	8.52293	8.34182	8.45211	8.89743	8.09981	8.29048
Fst	ENSMUSG00000021765	ENSMUSG00000021765	-0.180341	0.862891	-0.00704846	0.995681	-0.121547	0.932952	-0.0380167	0.992463		9.15021	8.89646	9.24097	9.10918	9.08849	9.23109	9.45908	9.33135	8.81058	9.22014	9.05411	9.06011	9.46532	9.16479	9.20667
Gm2000	ENSMUSG00000078193	ENSMUSG00000078193	0.558211	0.711792	0.615006	0.752698	0.384669	0.832022	0.565908	0.834431		10.5246	10.3084	9.22276	9.49958	9.66027	9.49847	9.29069	9.84415	9.98196	9.38623	9.85102	9.20158	9.38665	9.67929	9.60532
Ppig	ENSMUSG00000042133	ENSMUSG00000042133	-0.172013	0.894254	-0.662632	0.0448196	-0.0227467	0.989047	-0.0285719	0.993307		8.45217	8.34128	8.42718	8.50753	8.4828	8.3076	8.28156	8.23614	8.72392	9.11484	8.96575	9.10748	8.15658	8.77255	8.72935
Cavin2	ENSMUSG00000045954	ENSMUSG00000045954	-0.240312	0.791532	-0.319054	0.747727	-0.165807	0.877788	-0.095246	0.990293		8.93532	8.7175	8.83947	8.93435	8.92097	8.92804	8.90738	9.0423	9.04025	9.08788	8.95499	9.37147	8.65401	9.34664	9.13082
Tcf12	ENSMUSG00000032228	ENSMUSG00000032228	0.113908	0.928446	0.0113792	0.995681	0.16595	0.861095	-0.0269628	0.993307		8.66814	8.94763	9.19585	8.97846	9.08273	8.89617	8.87108	8.70194	8.81058	8.99598	8.91391	8.93785	9.069	8.56144	8.86928
Gpd2	ENSMUSG00000026827	ENSMUSG00000026827	0.102795	0.90372	-0.110772	0.993883	-0.0912356	0.922118	0.0653771	0.990293		9.23851	9.11884	9.23603	9.08316	9.18309	9.14151	9.20337	9.34507	9.32095	9.22014	9.25828	9.43903	8.96169	9.20829	9.11403
Arglu1	ENSMUSG00000040459	ENSMUSG00000040459	-0.183127	0.72269	-0.153613	0.923233	-0.110792	0.880553	-0.015221	0.993307		9.51091	9.64774	9.35331	9.49806	9.55807	9.50059	9.51111	9.5971	9.72602	9.66848	9.67369	9.62741	9.67498	9.76756	9.60931
Vcan	ENSMUSG00000021614	ENSMUSG00000021614	-0.115484	0.928808	-0.356128	0.602071	-0.099626	0.944146	-0.16944	0.967914		8.55628	8.59445	9.02864	8.94551	8.95291	8.86029	8.93986	8.57184	9.0054	9.1905	9.16798	8.94919	8.93575	8.70668	8.94716
Eif4a3	ENSMUSG00000025580	ENSMUSG00000025580	0.000793359	0.999155	0.0888348	0.995681	0.0170933	0.989047	0.0365944	0.992218		9.73762	9.91037	9.61943	9.64212	9.88882	9.62051	9.79237	9.79001	9.63396	9.69957	9.77352	9.52648	9.91664	9.70314	9.63503
Klf3	ENSMUSG00000029178	ENSMUSG00000029178	0.0346428	0.991488	0.0644699	0.995681	-0.0571891	0.985028	0.132963	0.98912		10.1221	10.0119	9.36543	9.77435	9.78085	9.63795	9.72956	9.88699	10.1227	9.80414	10.0206	9.54005	9.72632	10.0657	9.66607
Cyrib	ENSMUSG00000022378	ENSMUSG00000022378	-0.0119104	0.995885	-0.0832626	0.995681	0.116165	0.939283	-0.0807947	0.990293		8.91897	8.88438	9.10656	9.03385	9.09136	9.046	8.84013	9.10008	8.60092	9.17894	8.88586	9.09731	9.27843	8.88701	8.74397
Emc6	ENSMUSG00000047260	ENSMUSG00000047260	0.303234	0.598454	0.202218	0.926897	0.304997	0.535068	0.208581	0.954076		8.8899	9.36458	9.31631	8.91406	9.07694	9.01369	8.84013	9.10547	8.74871	8.94227	9.09144	8.98712	9.04493	8.90768	8.75484
Ptgs2	ENSMUSG00000032487	ENSMUSG00000032487	1.16809	0.490834	0.522395	0.993883	1.19639	0.408615	0.865405	0.882143		7.42868	7.56461	8.79309	7.21215	7.34365	7.10929	7.02511	6.70796	6.95898	7.57428	7.65706	7.43982	6.91275	5.39445	7.67202
Rpl39l	ENSMUSG00000039209	ENSMUSG00000039209	0.0346827	0.991488	0.349707	0.767027	0.169505	0.90486	0.188894	0.967914		8.99894	9.07702	9.23438	8.89347	8.80675	9.05468	9.20094	8.99957	8.5454	8.945	8.67911	8.64589	9.42238	8.82937	8.89571
Ppp2ca	ENSMUSG00000020349	ENSMUSG00000020349	-0.00151637	0.99911	0.0544342	0.995681	0.0526315	0.98263	0.0752822	0.990293		8.70675	8.64779	9.24426	8.84903	8.79974	8.83698	8.95439	8.88214	8.70594	8.88078	8.94958	8.71133	8.90636	8.88105	8.92809
Fosl2	ENSMUSG00000029135	ENSMUSG00000029135	0.00564956	0.995885	0.0485359	0.995681	0.202516	0.828682	0.00317075	0.998729		8.56682	8.76216	9.10656	8.82023	8.85149	8.83362	8.67099	8.68406	8.55347	8.54831	8.77093	9.00898	8.72304	9.02584	8.72567
F2r	ENSMUSG00000048376	ENSMUSG00000048376	0.331028	0.914149	-0.159	0.995681	0.244849	0.944146	-0.32518	0.986393		7.19061	7.38205	8.80872	8.25126	8.45184	8.23812	7.80536	7.7367	7.72328	7.96207	8.30839	8.16732	7.84591	6.99939	7.98674
Tatdn2	ENSMUSG00000056952	ENSMUSG00000056952	-0.383514	0.360587	-0.138724	0.995681	-0.261399	0.678885	-0.0157693	0.993307		9.19164	9.04122	9.12629	9.01067	9.14489	9.24886	9.61352	9.42906	9.04025	9.29061	9.31408	9.16895	9.2853	9.71491	9.47335
Gabarap	ENSMUSG00000018567	ENSMUSG00000018567	-0.138202	0.865142	0.0035094	0.99649	-0.153184	0.831321	-0.217843	0.850935		9.0524	8.95149	9.25244	9.2722	9.3192	9.35112	9.3795	9.14261	9.21564	9.09282	9.0791	9.1095	9.39936	9.15988	9.12803
Lars	ENSMUSG00000024493	ENSMUSG00000024493	0.202112	0.834973	0.137816	0.995681	0.253134	0.702707	0.101136	0.990293		9.10755	9.30545	9.31318	9.07506	9.28448	9.0719	9.1985	8.78817	8.96969	9.0091	9.29073	9.01331	9.24126	8.7201	9.12803
Psmd3	ENSMUSG00000017221	ENSMUSG00000017221	0.131421	0.894787	-0.0599959	0.995681	0.3342	0.361126	0.106935	0.98912		8.93938	9.01193	9.12985	8.93435	8.91124	8.93433	8.53068	8.98503	8.54135	8.99598	9.15628	9.11958	8.88844	8.83863	8.97841
Prdx6	ENSMUSG00000026701	ENSMUSG00000026701	0.272396	0.588444	0.125135	0.993883	0.175618	0.796912	0.176933	0.95908		9.6262	9.73099	9.43325	9.37642	9.34109	9.54237	9.38808	9.50232	9.37655	9.44147	9.49209	9.48653	9.26461	9.55939	9.11965
Sbno1	ENSMUSG00000038095	ENSMUSG00000038095	-0.117282	0.894787	-0.166943	0.935382	-0.0248451	0.988899	0.033107	0.992218		9.43243	9.39042	9.32565	9.28455	9.35311	9.40872	9.34463	9.52259	9.34438	9.68329	9.52884	9.42121	9.27154	9.59077	9.60931
Timm13	ENSMUSG00000020219	ENSMUSG00000020219	-0.441308	0.361692	-0.117508	0.995681	-0.438511	0.345622	-0.223536	0.966979		9.38262	9.37036	8.84164	9.31926	9.41634	9.56281	9.91924	9.58366	9.39462	9.56744	9.30351	9.0809	9.5226	9.80896	9.60931
Mxra8	ENSMUSG00000029070	ENSMUSG00000029070	-0.328008	0.595449	-0.28435	0.824104	-0.353513	0.460718	-0.446495	0.348479		8.75822	8.80121	8.44729	9.28981	9.00564	9.01962	8.98018	9.06459	9.01711	8.85194	8.74929	9.20915	9.08744	9.11234	8.75844
Rab1a	ENSMUSG00000020149	ENSMUSG00000020149	0.112795	0.946319	0.028786	0.995681	0.140432	0.926954	-0.0851398	0.990293		8.50243	8.87221	9.08838	8.87259	8.98724	8.93433	8.80208	8.86001	8.42311	8.88078	8.64938	8.91024	9.053	8.48097	8.60672
ENSMUSG00000120849	ENSMUSG00000120849	ENSMUSG00000120849	0.0420916	0.991157	0.0476125	0.995681	-0.0192967	0.989792	-0.110992	0.990293		9.99719	9.95338	9.1334	9.8187	9.86383	9.86892	9.74636	9.7613	9.76994	9.72841	9.79329	9.54604	9.70941	9.96783	9.34975
Trib1	ENSMUSG00000032501	ENSMUSG00000032501	0.531243	0.219177	0.510956	0.34858	0.45988	0.343581	0.751255	0.0232643		8.97541	8.59938	9.13694	8.20746	8.25579	8.07691	8.37091	8.64392	8.37842	8.51926	8.55278	8.15953	8.37823	8.69653	8.04693
Cfdp1	ENSMUSG00000031954	ENSMUSG00000031954	-0.139689	0.911024	-0.00683688	0.995681	-0.102951	0.944146	0.106613	0.990293		9.76761	9.63339	9.41002	9.46744	9.49003	9.54853	9.60986	9.67159	9.84084	9.66683	9.83203	9.29881	9.34565	9.89576	9.93016
Snrpe	ENSMUSG00000090553	ENSMUSG00000090553	-0.244097	0.802355	-0.112244	0.995681	-0.196519	0.840213	-0.132361	0.98912		8.58766	8.63344	9.11735	8.87493	8.94657	8.99876	9.20581	9.00822	8.76269	9.10998	8.72733	8.89858	9.25298	8.951	8.92488
Srp72	ENSMUSG00000036323	ENSMUSG00000036323	0.0655098	0.961849	0.0582847	0.995681	0.139241	0.875263	0.21436	0.925538		9.82359	9.75771	9.449	9.39931	9.52445	9.47924	9.52091	9.54654	9.55984	9.67508	9.58226	9.61036	9.68193	9.81209	9.30361
Med28	ENSMUSG00000015804	ENSMUSG00000015804	0.330855	0.714279	0.223103	0.984942	0.342833	0.643046	0.0227219	0.993307		8.62342	8.84755	9.06627	8.84427	8.71659	8.94683	8.61357	8.61023	8.32289	8.62532	8.72733	8.56559	8.99835	8.22273	8.23463
Shmt2	ENSMUSG00000025403	ENSMUSG00000025403	-0.00870734	0.995885	0.143403	0.993883	0.162686	0.840213	-0.0394402	0.992218		9.30609	9.55432	9.27029	9.47823	9.41863	9.35582	9.23228	9.33594	9.07427	9.25801	9.32038	9.12959	9.60903	9.37236	9.14466
Sfxn1	ENSMUSG00000021474	ENSMUSG00000021474	-0.0596699	0.965879	-0.0311711	0.995681	0.0374574	0.986915	0.192089	0.964166		9.3856	9.63579	9.3272	9.21251	9.25915	9.31543	9.42611	9.63483	9.14535	9.61628	9.4658	9.36131	9.4203	9.70145	9.39445
Mcm7	ENSMUSG00000029730	ENSMUSG00000029730	0.150933	0.892449	0.189332	0.958952	0.0817012	0.956453	0.182593	0.967914		10.4569	10.4172	9.8698	10.0357	10.1202	10.1005	10.0454	10.1738	10.3259	10.1469	10.2022	9.86762	10.1439	10.2306	9.96334
Peak1	ENSMUSG00000074305	ENSMUSG00000074305	-0.0383171	0.988836	-0.0670251	0.995681	-0.10849	0.93969	0.078549	0.990293		9.25163	8.91635	9.19585	9.12496	9.16684	8.84033	9.33799	9.16082	9.208	9.06294	9.35966	9.15137	8.84884	9.31383	9.29619
Mcm6	ENSMUSG00000026355	ENSMUSG00000026355	0.1043	0.956325	0.0117929	0.995681	0.00729051	0.996577	-0.182468	0.9781		8.27719	8.36464	8.95832	8.81538	8.71659	8.73619	8.75969	8.58732	8.3276	8.28908	8.60189	8.76112	8.69238	8.17968	8.50309
St13	ENSMUSG00000022403	ENSMUSG00000022403	0.0430947	0.983661	0.0793532	0.995681	0.101606	0.93969	0.167703	0.967914		10.131	10.199	9.73142	9.60743	10.0092	9.94875	9.80043	10.0522	9.9256	9.97836	9.99453	9.88072	9.90183	10.1866	9.85133
Thbs1	ENSMUSG00000040152	ENSMUSG00000040152	-0.135786	0.92269	-0.163545	0.995674	-0.265149	0.739088	-0.161662	0.980471		8.95951	8.64779	9.11915	8.94773	9.20448	9.10015	9.29526	9.15044	9.11571	9.03242	9.04653	9.18055	9.07693	8.60548	9.39677
Mfap5	ENSMUSG00000030116	ENSMUSG00000030116	-0.35871	0.590458	-0.475869	0.352025	-0.488996	0.211223	-0.322941	0.789972		8.83431	8.66201	8.565	8.99573	9.04766	8.98065	8.89237	9.01395	9.53155	8.93404	9.21609	9.30236	8.90933	8.91645	9.27621
Acot7	ENSMUSG00000028937	ENSMUSG00000028937	0.0903262	0.932578	0.114094	0.995681	0.0552265	0.968258	0.167307	0.966979		9.29029	9.63579	9.45185	9.31066	9.3192	9.2689	9.38165	9.46511	9.38561	9.47401	9.43516	9.12959	9.37811	9.51003	9.22502
Ltbr	ENSMUSG00000030339	ENSMUSG00000030339	0.132607	0.928991	0.0243683	0.995681	0.0678632	0.9797	0.233016	0.966979		9.57493	9.38472	9.10475	9.02547	9.08849	9.27387	8.96591	9.52057	9.34902	9.1221	9.36577	9.50357	8.94733	9.55378	9.12524
Ubl5	ENSMUSG00000084786	ENSMUSG00000084786	0.126464	0.915114	0.00997432	0.995681	-0.047778	0.985028	0.175076	0.967914		9.43531	9.34709	9.16843	9.1694	9.11978	9.14151	9.05758	9.39429	9.59543	9.13173	9.30775	9.46298	8.96454	9.38083	9.20138
Glrx5	ENSMUSG00000021102	ENSMUSG00000021102	0.0215622	0.991488	0.0321293	0.995681	0.00882007	0.994893	0.0948386	0.98912		8.8857	8.84755	9.25081	8.92537	8.93062	8.91219	8.90738	9.11351	8.99655	8.945	8.97909	9.02837	9.03682	8.97918	8.96911
H13	ENSMUSG00000019188	ENSMUSG00000019188	-0.159851	0.835614	-0.098598	0.995681	-0.0901571	0.939283	-0.123047	0.974212		9.32793	9.22157	9.16323	9.46899	9.10564	9.46628	9.39449	9.20663	9.36972	9.27766	9.44481	9.27556	9.34126	9.38294	9.46012
H2az2	ENSMUSG00000041126	ENSMUSG00000041126	-0.165387	0.865796	-0.147875	0.993883	-0.188259	0.829701	-0.245762	0.89793		9.02592	8.77965	8.98017	9.09923	9.20448	9.22853	9.23704	9.21662	8.87955	8.98805	8.84856	9.35108	9.17382	8.97918	9.1336
Rhoa	ENSMUSG00000007815	ENSMUSG00000007815	0.135132	0.927805	0.013966	0.995681	-0.0295899	0.988899	-0.0948515	0.990293		9.52988	9.27186	9.15277	9.37477	9.51806	9.35816	9.08952	9.27751	9.63966	9.04521	9.58575	9.24826	9.15145	8.88105	9.47773
Basp1	ENSMUSG00000045763	ENSMUSG00000045763	-0.235459	0.6367	-0.148209	0.961861	-0.248236	0.525276	-0.145276	0.967914		9.51363	9.2994	9.31787	9.4074	9.4703	9.67973	9.63352	9.6142	9.62634	9.5442	9.58575	9.44385	9.51872	9.774	9.52717
Ndst1	ENSMUSG00000054008	ENSMUSG00000054008	-0.0260733	0.991488	0.0214011	0.995681	-0.0777336	0.950067	0.0100578	0.994901		9.44961	9.45442	9.31161	9.45344	9.32165	9.40193	9.22271	9.6404	9.5498	9.39225	9.43709	9.3182	9.28073	9.63394	9.34975
Atp5mpl	ENSMUSG00000021290	ENSMUSG00000021290	-0.228891	0.673674	-0.0899975	0.995681	-0.238428	0.590326	-0.0194588	0.993307		9.34945	9.16281	9.12629	9.26509	9.25147	9.17642	9.42402	9.38103	9.53969	9.24031	9.17958	9.46614	9.33245	9.58711	9.38749
Ube2r2	ENSMUSG00000036241	ENSMUSG00000036241	-0.201902	0.816771	-0.0398471	0.995681	-0.24131	0.70856	-0.233419	0.927156		8.46349	8.59445	9.09204	9.01703	9.00564	8.93746	8.9915	9.08381	8.90499	8.69517	8.80128	8.8821	8.97872	8.87207	9.01504
Cgnl1	ENSMUSG00000032232	ENSMUSG00000032232	-0.255711	0.714694	-0.13267	0.995681	-0.178627	0.840213	-0.0931827	0.990293		9.35554	9.15948	9.03244	9.31411	9.2668	9.24886	9.14884	9.34507	9.56384	9.27331	9.30563	9.36809	9.17382	9.7082	9.38282
Lsm6	ENSMUSG00000031683	ENSMUSG00000031683	-0.0447687	0.980548	-0.149502	0.993883	0.0298584	0.988899	0.0451771	0.992218		9.27431	9.23747	9.04945	9.24357	8.92741	9.22853	8.85259	9.24373	9.33271	9.34543	9.27784	9.37988	9.06369	9.31824	9.29867
Slc29a1	ENSMUSG00000023942	ENSMUSG00000023942	0.100295	0.951761	-0.00872903	0.995681	0.107825	0.944146	-0.229041	0.95908		8.41767	8.62379	8.9782	9.02547	8.97174	8.77174	8.6099	8.5562	8.6164	8.78029	8.82216	8.5115	8.85807	8.36618	8.53707
Ywhaq	ENSMUSG00000076432	ENSMUSG00000076432	0.145162	0.911024	-0.0306864	0.995681	0.102733	0.946219	-0.0983432	0.990293		8.38232	8.50266	8.94828	8.84427	8.70163	8.66233	8.763	8.51229	8.30867	8.58733	8.60189	8.81421	8.68894	8.4691	8.31026
Polr2e	ENSMUSG00000004667	ENSMUSG00000004667	0.042709	0.977453	0.149558	0.97157	0.0801224	0.944146	0.211064	0.882143		9.53525	9.67603	9.45185	9.40901	9.29946	9.32024	9.33799	9.6478	9.4213	9.52606	9.3979	9.28634	9.5031	9.63748	9.38282
Psmc1	ENSMUSG00000021178	ENSMUSG00000021178	0.204983	0.8912	0.126343	0.995681	0.122336	0.946219	0.375291	0.81046		10.1185	9.93983	9.36845	9.40417	9.46145	9.52996	9.35561	9.75103	9.97897	9.83835	9.93692	9.28634	9.37383	9.81052	9.68703
Klf7	ENSMUSG00000025959	ENSMUSG00000025959	0.290064	0.721829	0.254811	0.914533	0.323693	0.622289	0.145146	0.982436		8.60309	8.45992	9.09932	8.63148	8.65579	8.55213	8.36657	8.61401	8.31342	8.44782	8.58802	8.47742	8.7095	8.26454	8.4007
Bzw2	ENSMUSG00000020547	ENSMUSG00000020547	-0.169376	0.804361	-0.0368929	0.995681	-0.112151	0.902042	-0.094409	0.98912		9.0784	9.11195	9.23603	9.32268	9.14489	9.24633	9.16141	9.35415	9.25573	9.1413	9.27135	9.13755	9.30794	9.16479	9.46234
Zfp207	ENSMUSG00000017421	ENSMUSG00000017421	-0.00479789	0.996063	0.125801	0.995681	0.0217084	0.989047	0.0363026	0.992218		9.10394	8.87221	9.23107	9.01914	9.02379	9.09173	9.31566	9.03386	8.77654	8.90344	8.98704	8.97607	9.24831	9.02314	8.96911
Pfdn1	ENSMUSG00000024346	ENSMUSG00000024346	-0.046455	0.977453	-0.0272097	0.995681	-0.127758	0.90486	0.0702576	0.990293		9.88591	9.7129	9.36694	9.60884	9.59901	9.57695	9.71939	9.95269	9.6899	9.7379	9.66711	9.67055	9.52066	9.84614	9.74814
2410006H16Rik	ENSMUSG00000086841	ENSMUSG00000086841	0.507104	0.269955	0.332502	0.819079	0.592074	0.115815	0.358483	0.768896		8.37034	8.52357	9.02673	8.37521	8.46519	8.10506	7.87422	8.28915	8.08772	8.34396	8.40248	8.30088	8.2531	7.93123	8.32005
Ppp3r1	ENSMUSG00000033953	ENSMUSG00000033953	0.0548823	0.968596	-0.0122854	0.995681	0.124878	0.908135	-0.145003	0.967914		8.87302	9.04122	9.08105	9.1883	9.29448	8.93746	8.93986	8.95552	8.7346	8.99334	9.07662	8.97829	9.11852	8.95668	8.7476
Atrx	ENSMUSG00000031229	ENSMUSG00000031229	-0.305651	0.736089	-0.67713	0.0728282	-0.151058	0.920398	-0.224942	0.967914		8.42348	8.39332	8.38313	8.72506	8.75333	8.35056	8.32692	8.21138	8.98468	9.16494	9.13499	8.89858	8.52076	8.69653	8.86928
Tcof1	ENSMUSG00000024613	ENSMUSG00000024613	0.19729	0.839079	0.0623075	0.995681	0.2131	0.799092	0.446055	0.360301		8.67302	8.6714	9.08105	8.48324	8.33064	8.34112	8.56137	8.67322	8.62025	8.62872	8.84856	8.81669	8.42041	8.51985	8.91845
Rraga	ENSMUSG00000070934	ENSMUSG00000070934	-0.242192	0.842331	-0.385827	0.748611	-0.185401	0.904027	-0.0197335	0.993307		8.19129	8.21844	8.63178	8.37191	8.42931	8.3646	8.74973	8.5562	8.31816	8.55549	8.44923	9.14151	8.4894	8.42061	8.87594
Tecr	ENSMUSG00000031708	ENSMUSG00000031708	-0.379662	0.31921	-0.236407	0.86202	-0.406805	0.222207	-0.378796	0.464969		9.18139	9.18922	8.76362	9.49351	9.35071	9.42891	9.3578	9.39868	9.59543	9.19969	9.48463	9.1494	9.36953	9.56498	9.33534
Hnrnpab	ENSMUSG00000020358	ENSMUSG00000020358	-0.0621668	0.957599	-0.10259	0.995681	0.0309493	0.986683	0.148069	0.966979		9.22527	9.10849	9.27993	9.00642	9.01777	9.16041	9.0763	9.23884	9.21564	9.45496	9.29713	9.17089	9.21514	9.35741	9.23541
Mir100hg	ENSMUSG00000074415	ENSMUSG00000074415	-0.464907	0.45944	-0.778192	0.0383035	-0.541778	0.258762	-0.360334	0.824721		8.01788	8.22483	8.39205	8.57228	8.70913	8.45048	8.62087	8.40284	9.15333	8.84318	9.23845	8.87021	8.39525	8.67603	8.93447
Rpl10-ps2	ENSMUSG00000074108	ENSMUSG00000074108	-0.367572	0.921268	-0.0778506	0.995681	-0.231834	0.960819	-0.239073	0.990293		7.12084	7.46004	8.62675	8.13915	8.09905	8.14899	8.75969	7.86287	7.4046	8.05103	7.75955	8.07917	8.81761	7.55807	8.116
Serinc3	ENSMUSG00000017707	ENSMUSG00000017707	0.29466	0.721829	0.0714107	0.995681	0.032507	0.988899	-0.13331	0.98912		8.7628	8.74446	8.77729	9.06282	8.86499	8.72897	8.76958	8.70549	8.71316	8.33565	8.60877	9.03477	8.33477	8.29175	8.74397
Map1a	ENSMUSG00000027254	ENSMUSG00000027254	-0.133542	0.940403	-0.0500822	0.995681	-0.239212	0.840213	-0.0580201	0.992218		9.7835	9.42138	8.82856	9.42504	9.48567	9.43335	9.27689	9.68424	9.86372	9.37208	9.48463	9.46139	9.35002	9.81522	9.35214
Slc1a5	ENSMUSG00000001918	ENSMUSG00000001918	0.162283	0.839079	0.0556814	0.995681	0.150511	0.840213	0.111516	0.982436		9.07471	9.40739	9.26058	9.14058	9.09423	9.19487	9.1887	9.20663	8.89867	9.27331	9.16331	9.15921	9.22231	9.11234	8.92809
Zcrb1	ENSMUSG00000022635	ENSMUSG00000022635	-0.0487229	0.979213	-0.141303	0.993883	0.0438852	0.985028	0.184826	0.967914		9.2871	9.4186	9.11376	9.06487	9.02379	9.18171	9.30209	9.34051	9.03161	9.56033	9.3779	9.29704	9.03682	9.57239	9.311
Nap1l4	ENSMUSG00000059119	ENSMUSG00000059119	-0.173198	0.879839	-0.279264	0.846231	-0.191698	0.840213	-0.244926	0.941946		8.72568	8.83506	8.84381	9.07099	8.89489	9.16041	9.2275	8.99377	8.71316	9.16728	8.98175	9.08707	8.60364	9.25051	8.99989
Ecm1	ENSMUSG00000028108	ENSMUSG00000028108	-0.332881	0.651889	-0.218954	0.949518	-0.294911	0.676244	-0.156875	0.980471		9.02592	8.60919	8.96032	9.04634	8.96862	9.08327	9.12592	8.9674	9.38787	8.99334	9.14922	9.13755	8.77598	9.32045	9.44678
Dkc1	ENSMUSG00000031403	ENSMUSG00000031403	0.248267	0.818415	0.1155	0.995681	0.195147	0.869923	0.41043	0.711024		9.9637	9.77307	9.27029	9.36815	9.19382	9.28622	9.20337	9.58173	9.67149	9.62483	9.8217	9.22977	9.24361	9.62148	9.44901
Usp34	ENSMUSG00000056342	ENSMUSG00000056342	-0.485643	0.333507	-0.307827	0.860967	-0.371275	0.570382	0.173157	0.980471		8.78553	8.86404	8.58329	8.57515	8.53015	8.61613	8.8772	8.9733	9.43009	9.14606	9.06916	8.93099	8.7095	9.45493	9.40599
Rars	ENSMUSG00000018848	ENSMUSG00000018848	0.0481836	0.979294	0.0441661	0.995681	0.104704	0.93969	0.222075	0.939453		8.6082	8.84755	9.15975	8.70945	8.66353	8.66233	8.96878	8.78146	8.61255	8.97473	8.80128	8.78411	8.8642	8.77577	8.91199
Rab10	ENSMUSG00000020671	ENSMUSG00000020671	-0.0293549	0.991488	-0.0361653	0.995681	-0.206897	0.783347	-0.0466337	0.992218		9.18481	8.95535	9.17361	9.11907	9.27187	9.0719	9.21065	9.35415	9.37655	9.16728	9.14686	9.12359	8.8703	9.4689	9.00597
Eif3g	ENSMUSG00000070319	ENSMUSG00000070319	-0.183297	0.860904	-0.159571	0.993883	-0.196285	0.831321	-0.0987313	0.990293		8.52961	8.65728	9.08655	8.86086	8.71659	9.06044	9.19361	8.78817	8.93616	8.98007	8.97377	8.88446	8.88242	8.98474	9.03895
Fgf7	ENSMUSG00000027208	ENSMUSG00000027208	-0.258526	0.879839	-0.611362	0.508152	-0.471154	0.600839	-0.242129	0.974212		8.11439	8.27502	8.37416	8.51653	8.58009	8.39684	8.59143	8.02507	9.2875	8.81954	9.01838	8.74558	8.10061	8.36618	8.95032
Sptan1	ENSMUSG00000057738	ENSMUSG00000057738	0.0697403	0.961849	0.0695153	0.995681	-0.0263273	0.988899	-0.0800488	0.990293		8.74436	8.83087	9.05321	9.1072	8.91773	8.86029	8.96304	8.94955	8.8273	8.61162	8.93323	8.89154	8.97023	8.68289	8.79049
Poldip3	ENSMUSG00000041815	ENSMUSG00000041815	0.170237	0.807273	0.132417	0.993883	0.243391	0.57192	0.197921	0.920649		9.30923	9.46257	9.39826	9.13669	9.29448	9.15234	9.12077	9.21911	9.10752	9.32669	9.4078	9.02408	9.23419	9.28928	9.13914
Saraf	ENSMUSG00000031532	ENSMUSG00000031532	-0.07853	0.963295	-0.0552941	0.995681	-0.0802873	0.965614	-0.120879	0.98912		8.54034	8.45992	8.81536	8.95658	8.55533	8.66611	8.67801	8.70194	8.71675	8.41665	8.56344	8.97607	8.63264	8.89886	8.53286
Tmem119	ENSMUSG00000054675	ENSMUSG00000054675	-0.331119	0.765957	0.00927487	0.995681	-0.311241	0.774339	-0.221942	0.967914		9.02592	9.08759	8.37115	9.08719	9.00868	9.13059	9.25123	9.37881	8.80383	8.73362	8.73992	9.04327	8.82391	9.6179	8.98458
Uqcrb	ENSMUSG00000021520	ENSMUSG00000021520	-0.0523987	0.991075	0.13561	0.995681	0.00858746	0.996577	-0.0552039	0.992218		8.29631	8.68539	8.98214	8.62595	8.57599	8.98973	8.9486	8.81799	8.14754	8.64898	8.38655	8.60916	9.0822	8.47702	8.58252
Srp14	ENSMUSG00000009549	ENSMUSG00000009549	-0.199978	0.817943	-0.106914	0.995681	-0.173996	0.840213	-0.0589468	0.991778		8.66814	8.81824	9.11197	8.88655	9.05061	8.89295	9.05758	9.10815	9.00834	8.95317	8.91946	9.09527	9.20794	8.76933	9.23282
Cdc37	ENSMUSG00000019471	ENSMUSG00000019471	0.054034	0.976793	0.158344	0.993883	0.0344862	0.988899	0.223539	0.947868		10.2436	9.99701	9.60544	9.73632	9.71159	9.78614	9.84633	10.0354	9.91156	9.92536	9.89672	9.58585	9.88837	10.0994	9.72806
Gm7287	ENSMUSG00000108694	ENSMUSG00000108694	0.0432851	0.991075	-0.0108991	0.995681	0.0124513	0.994893	-0.0548274	0.992218		9.2418	9.62131	9.14751	9.21066	9.4791	9.50694	9.30889	9.55443	9.11298	9.39625	9.39393	9.28813	9.62354	9.36383	8.81493
Epb41l2	ENSMUSG00000019978	ENSMUSG00000019978	0.31255	0.720989	0.25886	0.922954	0.285315	0.732452	0.368451	0.762233		8.73037	8.62379	9.08838	8.32143	8.47841	8.60039	8.7397	8.50416	8.38747	8.48961	8.47582	8.74818	8.46139	8.16504	8.86595
Psmd4	ENSMUSG00000005625	ENSMUSG00000005625	0.138972	0.923226	0.13819	0.995681	0.154249	0.915919	0.294401	0.920649		10.2304	10.2087	9.466	9.73889	9.74116	9.65328	9.66036	9.96903	9.90684	9.91564	10.0663	9.58002	9.69573	10.0591	9.82063
Por	ENSMUSG00000005514	ENSMUSG00000005514	-0.275743	0.632143	-0.0276044	0.995681	-0.161611	0.840213	0.0247197	0.993307		9.23521	9.09459	9.15801	9.1541	9.13934	9.12235	9.52675	9.31052	9.10203	9.42981	9.08405	9.02837	9.4633	9.51966	9.32078
Kank2	ENSMUSG00000032194	ENSMUSG00000032194	-0.580309	0.0820451	-0.155575	0.995681	-0.444656	0.295244	-0.175742	0.967914		8.88149	8.72203	8.46712	8.94328	8.87836	8.77525	9.22989	9.05627	9.11298	8.58383	8.72099	9.167	9.00391	9.44688	9.32322
Hp1bp3	ENSMUSG00000028759	ENSMUSG00000028759	-0.11195	0.929329	-0.105913	0.995681	-0.0870057	0.956453	-0.208778	0.964166		8.51336	8.58453	8.93002	8.90951	9.03578	8.75051	8.83699	8.82454	8.6804	8.67556	8.65271	9.0369	8.94733	8.81068	8.64617
Palld	ENSMUSG00000058056	ENSMUSG00000058056	-0.140062	0.900548	-0.022193	0.995681	-0.150217	0.887194	-0.0588019	0.991778		9.13966	9.25007	9.03434	9.27042	9.13657	9.18699	9.17388	9.0507	9.59152	8.93953	9.18879	9.33213	9.13635	9.30049	9.39445
Mlec	ENSMUSG00000048578	ENSMUSG00000048578	-0.199153	0.812248	0.00797959	0.995681	-0.234057	0.70591	-0.0798292	0.990293		9.87959	9.82663	9.32098	9.74784	9.72275	9.83738	9.94711	9.91792	9.90527	9.83394	9.66051	9.54005	9.70088	10.0498	9.89457
Sp1	ENSMUSG00000001280	ENSMUSG00000001280	0.121848	0.940091	0.189125	0.993883	0.114014	0.944146	0.0458173	0.992218		8.72097	9.01931	9.0975	8.96098	8.85149	8.92172	9.1336	8.86001	8.46218	9.02727	8.65604	8.59189	9.06634	8.58729	8.81839
Anapc11	ENSMUSG00000025135	ENSMUSG00000025135	0.0913246	0.948451	0.170461	0.98619	0.0895485	0.944146	0.149728	0.967914		9.86685	9.98764	9.38492	9.68135	9.65057	9.50271	9.54989	9.72853	9.73669	9.49468	9.6405	9.64007	9.71111	9.79317	9.49512
Wwtr1	ENSMUSG00000027803	ENSMUSG00000027803	0.49892	0.0359004	0.285312	0.630226	0.397976	0.154118	0.233615	0.840067		8.95951	8.9858	9.11915	8.91179	8.8447	8.60434	8.67801	8.66959	8.5454	8.80156	8.85436	8.56559	8.59261	8.56144	8.43714
Pnisr	ENSMUSG00000028248	ENSMUSG00000028248	-0.11286	0.918562	-0.0910396	0.995681	-0.0872205	0.944146	0.0837988	0.990293		9.44961	9.36747	9.26383	9.12496	9.31183	9.38596	9.3578	9.58559	9.38561	9.55855	9.46959	9.31469	9.50114	9.69297	9.17195
Atp5c1	ENSMUSG00000025781	ENSMUSG00000025781	0.163938	0.842331	-0.126642	0.993883	0.048721	0.980748	0.0375678	0.992218		8.65832	8.68074	8.95431	8.78092	8.68271	8.75762	8.72622	8.83754	8.62025	8.83141	8.78315	9.07676	8.63622	8.5389	8.67316
D8Ertd738e	ENSMUSG00000019362	ENSMUSG00000019362	-0.0528645	0.965879	0.00543199	0.995681	-0.0364066	0.985028	0.128724	0.967914		9.20519	9.35586	9.30218	9.20139	9.15865	9.12235	9.25358	9.32675	9.39462	9.22014	9.4865	9.12559	9.24831	9.46093	9.30854
Gm8420	ENSMUSG00000072324	ENSMUSG00000072324	-0.810517	0.103377	-0.686478	0.34858	-0.44922	0.634644	-0.342166	0.95908		7.4516	7.49221	8.278	8.20746	8.05264	8.16512	8.68151	8.07533	7.8596	8.40479	8.05489	8.87021	8.54765	8.69314	8.57436
Hspg2	ENSMUSG00000028763	ENSMUSG00000028763	-0.0956751	0.951761	-0.0690458	0.995681	-0.160264	0.900231	-0.316501	0.789972		8.51336	8.44903	8.8589	9.01067	8.8481	8.95303	9.00272	8.72661	8.59312	8.67556	8.58454	8.81173	8.97872	8.38736	8.73667
Lmo7	ENSMUSG00000033060	ENSMUSG00000033060	-0.190687	0.773302	-0.270864	0.642631	-0.102574	0.917466	-0.0442316	0.992218		8.91897	8.76656	8.9136	8.91859	9.04173	8.76823	8.99431	8.89774	9.02002	9.09774	9.0028	9.29526	8.95596	9.12752	9.08848
Atp5pb	ENSMUSG00000000563	ENSMUSG00000000563	0.0343943	0.991488	0.10665	0.995681	0.13363	0.925069	-0.207723	0.966979		8.37034	8.51315	8.9782	8.81538	8.93383	8.83362	8.56517	8.56013	8.44061	8.5519	8.44923	8.6403	8.90339	8.4165	8.49447
Uqcrc1	ENSMUSG00000025651	ENSMUSG00000025651	-0.894951	0.000351268	-0.503743	0.325453	-0.296407	0.679713	-0.406087	0.652889		8.34609	8.34716	8.04531	8.57802	8.5002	8.84368	8.80208	8.42885	8.34164	8.79551	8.43382	8.95145	9.1414	9.24123	9.00293
Gpat4	ENSMUSG00000031545	ENSMUSG00000031545	-0.280522	0.74738	-0.0503685	0.995681	-0.1603	0.907779	-0.00303687	0.998729		9.23851	9.04845	8.86104	9.02966	8.94657	9.18436	9.0763	9.36316	9.18482	9.20426	8.85146	9.22417	8.98997	9.69467	9.2198
Copa	ENSMUSG00000026553	ENSMUSG00000026553	-0.06771	0.984235	0.0772401	0.995681	-0.0250464	0.989792	-0.151201	0.990293		8.08537	7.8723	8.80872	8.56651	8.33064	8.51064	8.57272	8.0917	8.34164	8.03059	8.07986	8.56559	8.67855	7.97106	8.43714
Abcf1	ENSMUSG00000038762	ENSMUSG00000038762	-0.0754247	0.965879	-0.0492228	0.995681	-0.10445	0.949116	0.298668	0.884634		9.70222	9.5026	9.0017	9.11314	9.16956	9.10294	9.39449	9.59136	9.59347	9.54059	9.50506	9.37315	9.14895	9.83694	9.43106
Ube2d2a	ENSMUSG00000091896	ENSMUSG00000091896	0.056408	0.965879	-0.0160663	0.995681	0.043326	0.984519	-0.0155239	0.993307		9.40921	9.3961	9.23272	9.31066	9.46809	9.29846	9.19361	9.40306	9.30193	9.38422	9.35966	9.33905	9.3057	9.51003	9.00293
Ier3ip1	ENSMUSG00000090000	ENSMUSG00000090000	0.171418	0.90372	-0.00807402	0.995681	0.100367	0.956507	0.152953	0.98912		8.21158	8.61408	8.96631	8.44917	8.64018	8.35993	8.43032	8.69838	8.47498	8.61505	8.47958	8.82164	8.39101	8.18453	8.77277
Ube2k	ENSMUSG00000029203	ENSMUSG00000029203	0.24621	0.716729	0.04182	0.995681	0.251411	0.669384	0.107712	0.98912		8.81676	8.99705	9.04569	8.99358	8.73875	8.80644	8.5268	8.7301	8.85693	8.85485	9.05915	8.83149	8.8642	8.48883	8.7692
Smarcc1	ENSMUSG00000032481	ENSMUSG00000032481	-0.189819	0.87036	-0.0748625	0.995681	-0.222348	0.824172	0.208757	0.967914		9.48337	9.20549	8.88441	8.93883	8.99953	9.05757	9.29526	9.38989	9.58169	9.2224	9.23623	9.37652	8.97872	9.69127	9.42653
Hectd1	ENSMUSG00000035247	ENSMUSG00000035247	-0.0387906	0.973545	-0.00671451	0.995681	0.0513121	0.960819	0.141156	0.95908		9.11115	9.30846	9.25081	9.11116	9.0565	9.09173	9.25123	9.14261	9.13195	9.21788	9.26046	9.22417	9.28073	9.30272	9.21193
Cyb5b	ENSMUSG00000031924	ENSMUSG00000031924	-0.0434447	0.979839	-0.0349649	0.995681	-0.0941769	0.93969	-0.158216	0.967914		8.79452	8.6714	9.11197	9.02125	9.00259	9.08891	8.99992	9.10815	8.79706	8.89781	9.0158	8.82903	9.01221	8.90475	8.84914
Mogs	ENSMUSG00000030036	ENSMUSG00000030036	0.0865389	0.961849	0.0484267	0.995681	0.0888761	0.959691	-0.109974	0.990293		8.67302	8.85582	8.97622	8.95878	8.93383	8.96537	8.77614	8.85682	8.62408	9.03242	8.60189	8.71931	9.13635	8.67946	8.34424
Nfic	ENSMUSG00000055053	ENSMUSG00000055053	0.0852029	0.929012	0.032428	0.995681	0.0241073	0.988899	-0.0023768	0.998729		9.4722	9.44075	9.25244	9.43615	9.22293	9.49209	9.36869	9.43763	9.2778	9.40819	9.34943	9.30589	9.25997	9.42451	9.21193
Pycr2	ENSMUSG00000026520	ENSMUSG00000026520	0.110255	0.926242	0.123809	0.995681	0.214591	0.770902	0.0448279	0.992218		9.01056	9.17608	9.16669	9.11907	9.06237	9.046	8.85259	9.07834	8.77654	9.13413	9.06666	8.77394	9.26461	8.79808	8.93128
Ctnnbip1	ENSMUSG00000028988	ENSMUSG00000028988	-0.0367379	0.991075	0.0422914	0.995681	-0.0380286	0.988797	0.0418569	0.992218		9.66348	9.47066	9.2144	9.40093	9.38155	9.46193	9.43649	9.64411	9.39012	9.53878	9.37589	9.32169	9.26229	9.82612	9.32078
Tomm7	ENSMUSG00000028998	ENSMUSG00000028998	0.06068	0.970432	0.0489755	0.995681	0.035529	0.988899	0.0148475	0.993307		8.50243	8.75334	9.04381	8.80562	8.81372	8.71076	8.87414	8.90084	8.45359	8.73046	8.64604	8.84613	8.77923	8.67603	8.74033
Flt1	ENSMUSG00000029648	ENSMUSG00000029648	0.537887	0.595272	0.0856633	0.995681	0.387057	0.753305	0.546269	0.746342		8.04073	7.54429	8.79085	7.87088	7.54986	7.62688	7.786	7.83721	7.91697	8.12038	8.36639	7.91294	7.50537	7.34944	8.1272
Cd81	ENSMUSG00000037706	ENSMUSG00000037706	0.0422839	0.984235	0.065988	0.995681	0.123318	0.916943	-0.0709539	0.990293		8.90243	9.05565	9.00558	9.04634	8.94021	9.18436	8.92224	8.79818	8.87955	8.84903	8.72416	9.15921	9.14644	8.68973	8.97222
Grem1	ENSMUSG00000074934	ENSMUSG00000074934	-0.165529	0.913731	-0.487808	0.528103	-0.120667	0.946219	0.00355985	0.998729		8.32762	8.21201	8.71706	8.39487	8.39251	8.52738	8.43032	8.25079	8.92066	9.02727	9.11821	8.58026	8.42041	8.51215	8.85252
Ehd1	ENSMUSG00000024772	ENSMUSG00000024772	0.0448381	0.969713	0.161177	0.922954	0.0385585	0.983378	0.17019	0.939453		9.5406	9.62857	9.48557	9.29505	9.28699	9.55058	9.52869	9.5662	9.43882	9.38623	9.41371	9.37147	9.35002	9.57424	9.58313
Gm11935	ENSMUSG00000081206	ENSMUSG00000081206	0.13754	0.929329	0.265532	0.926897	0.365681	0.605453	-0.0277453	0.993307		8.99505	9.51831	9.00558	9.12888	9.23338	9.29358	8.88024	9.10547	8.4187	9.09036	8.7617	8.91488	9.29667	9.09956	8.70713
Ppp2r2a	ENSMUSG00000022052	ENSMUSG00000022052	0.0644802	0.955231	0.138494	0.980293	0.184835	0.721763	0.138099	0.967914		9.2871	9.21516	9.30533	9.09923	9.22031	9.08043	9.0763	9.06735	9.11843	9.23808	9.13975	9.01763	9.26692	9.32265	9.009
Macf1	ENSMUSG00000028649	ENSMUSG00000028649	-0.13688	0.865796	-0.0634827	0.995681	0.0286592	0.988899	-0.0201547	0.993307		9.18139	9.33236	9.24918	9.13863	9.35789	9.32742	9.3578	9.06182	9.24581	9.43566	9.26265	9.25193	9.30344	9.52922	9.3305
Irf2bpl	ENSMUSG00000034168	ENSMUSG00000034168	0.0470099	0.991488	0.161862	0.995681	-0.0489105	0.988899	0.119502	0.990293		8.07803	8.2312	8.94424	8.30074	8.34516	8.43726	8.86187	8.41156	8.23537	8.47456	8.27418	8.19809	8.65754	8.00981	8.55376
Igfbp2	ENSMUSG00000039323	ENSMUSG00000039323	0.132414	0.915114	0.12703	0.995681	0.32925	0.561839	-0.0754215	0.990293		8.99505	9.23431	8.99586	9.08316	9.15316	9.22083	8.7464	8.87269	8.62408	8.95045	8.97643	8.9287	9.32136	8.86604	8.54126
Dlgap4	ENSMUSG00000061689	ENSMUSG00000061689	-0.139381	0.901021	0.158514	0.993883	-0.0228628	0.988899	0.143631	0.9781		9.56182	9.58448	9.26383	9.24357	9.39324	9.35347	9.43856	9.61609	9.4257	9.52423	9.18879	9.21104	9.53609	9.89576	9.34736
Srsf7	ENSMUSG00000024097	ENSMUSG00000024097	0.149388	0.922301	0.129653	0.995681	0.231608	0.836711	0.0555431	0.992218		8.12155	8.20556	8.95029	8.39161	8.43836	8.47657	8.19612	8.38081	8.19985	8.37266	8.32938	8.3835	8.57778	8.21327	8.20323
Nop10	ENSMUSG00000027133	ENSMUSG00000027133	0.0802786	0.956106	-0.0537108	0.995681	-0.00072662	0.999106	-0.0621659	0.990293		8.85594	8.63824	8.99781	9.04219	8.89818	8.75407	8.9515	8.84399	8.72749	8.92021	9.03891	8.71665	8.88844	8.55021	8.83213
Arpc5l	ENSMUSG00000026755	ENSMUSG00000026755	-0.0729769	0.961849	-0.0521601	0.995681	0.192832	0.817927	-0.0405008	0.992218		8.89409	9.00079	9.00558	8.98928	9.10848	8.92488	8.77614	8.99957	8.51682	9.16494	8.91946	8.96717	8.97872	9.25743	8.85589
Crebbp	ENSMUSG00000022521	ENSMUSG00000022521	-0.181595	0.85565	-0.121076	0.995681	-0.159845	0.874318	0.037825	0.992218		9.26463	9.10849	8.8949	9.05666	9.0268	9.08043	9.14884	9.22159	9.37428	8.98274	9.24066	9.38323	8.95883	9.50617	9.30114
Smc6	ENSMUSG00000020608	ENSMUSG00000020608	-0.121366	0.894787	-0.187962	0.913272	-0.0210662	0.988899	0.0213949	0.993307		8.8899	8.99331	8.92389	9.00855	8.83101	8.89295	8.85259	8.8343	9.16127	9.0091	9.11096	9.23534	9.05568	8.96797	9.1419
Clic1	ENSMUSG00000007041	ENSMUSG00000007041	0.286489	0.772343	0.292354	0.888255	0.305181	0.698887	0.436885	0.660993		10.0859	9.89641	9.26058	9.44561	9.28197	9.31301	9.16141	9.75618	9.46257	9.4062	9.65553	9.40317	9.31019	9.67068	9.49295
Tnfrsf1a	ENSMUSG00000030341	ENSMUSG00000030341	-0.101828	0.959224	-0.043611	0.995681	-0.0859213	0.968258	-0.216968	0.967914		8.30263	8.21844	8.81978	8.61202	8.58417	8.87671	8.80208	8.47117	8.39197	8.20947	8.40643	8.87021	8.59997	8.4849	8.6578
Cnn3	ENSMUSG00000053931	ENSMUSG00000053931	-0.0210687	0.992047	0.190803	0.921415	-0.0610942	0.966624	0.0354217	0.992218		9.45246	9.22795	9.21942	9.32097	9.29199	9.17907	9.30663	9.23639	9.52746	9.02469	9.01321	9.27736	9.2247	9.25282	9.47773
Xrn2	ENSMUSG00000027433	ENSMUSG00000027433	-0.0730292	0.945168	-0.0478456	0.995681	-0.134063	0.840213	0.143716	0.966979		9.56445	9.58448	9.41294	9.24537	9.43455	9.44662	9.58393	9.74242	9.62634	9.68165	9.5629	9.44866	9.48533	9.63217	9.65258
Kmt2a	ENSMUSG00000002028	ENSMUSG00000002028	-0.285179	0.664992	-0.239382	0.880056	-0.275709	0.633726	0.059389	0.991778		9.18481	9.08407	8.83512	9.08518	8.93062	8.90581	9.0763	9.34051	9.48593	9.2863	9.34531	9.18823	9.04493	9.49059	9.38749
Gm8648	ENSMUSG00000083166	ENSMUSG00000083166	-0.684258	0.238249	-0.116896	0.995681	-0.426856	0.651017	-0.25482	0.967914		7.67253	8.28729	8.53041	8.4863	8.34033	8.56029	9.10001	8.62904	7.954	8.61505	8.1895	8.13589	8.96454	8.93958	8.75844
Ptbp3	ENSMUSG00000028382	ENSMUSG00000028382	0.0371254	0.991488	-0.0295845	0.995681	0.0486403	0.985028	-0.193965	0.967914		8.19809	8.28117	8.89908	8.70945	8.68651	8.70709	8.39241	8.43313	8.55347	8.42842	8.56698	8.61202	8.65401	8.36618	8.37744
Ube2c	ENSMUSG00000001403	ENSMUSG00000001403	0.0317817	0.991488	-0.160285	0.993883	-0.0025112	0.999106	-0.154897	0.980471		8.48031	8.53391	8.8823	8.76338	8.77851	8.87016	8.73634	8.57184	8.64687	8.77722	8.78618	8.86303	8.96169	8.20852	8.59063
Prdx2	ENSMUSG00000005161	ENSMUSG00000005161	-0.393191	0.227748	-0.332158	0.53935	-0.31174	0.443422	-0.243197	0.850935		8.77648	8.51837	8.77729	8.86791	8.99953	8.95303	9.03862	8.99377	8.99063	8.97205	8.84856	9.23163	8.89743	9.16969	9.18272
Pam	ENSMUSG00000026335	ENSMUSG00000026335	-0.076169	0.965879	-0.0579294	0.995681	-0.156717	0.910627	-0.109383	0.990293		9.45813	9.40739	9.02291	9.25795	9.58073	9.38596	9.12335	9.31285	9.84577	9.13652	9.51974	9.40317	9.38878	9.40595	9.34496
Gpi1	ENSMUSG00000036427	ENSMUSG00000036427	0.0943544	0.945168	0.224061	0.90814	0.120597	0.918487	0.0493611	0.992218		9.73995	9.95723	9.48835	9.56033	9.73932	9.75982	9.53063	9.8198	9.47748	9.65852	9.49766	9.37484	9.7162	9.774	9.41287
Rpl35a	ENSMUSG00000060636	ENSMUSG00000060636	0.376244	0.915114	0.239063	0.995681	0.212377	0.967574	0.311785	0.98912		7.34547	7.13273	8.67383	7.68641	7.41876	7.65	7.79894	7.56755	7.68708	7.60916	7.36357	7.94957	7.77615	6.3928	7.96818
Gm8292	ENSMUSG00000100215	ENSMUSG00000100215	0.140772	0.959886	-0.167474	0.995681	0.221154	0.92022	0.20158	0.98912		8.12868	7.28743	8.51689	7.71276	7.7522	8.12169	7.786	7.89431	7.87898	7.90144	7.84363	8.76369	8.22005	7.60945	7.90453
Serping1	ENSMUSG00000023224	ENSMUSG00000023224	-0.354745	0.681503	-0.386068	0.718468	-0.257498	0.799092	-0.477876	0.543695		8.09268	8.09816	8.43007	8.82749	8.56776	8.67365	8.29532	8.37636	8.72392	8.17728	8.6326	8.90559	8.57405	8.35762	8.76204
Ap1s1	ENSMUSG00000004849	ENSMUSG00000004849	0.0180312	0.994628	0.148571	0.995114	0.0639586	0.971892	-0.00267573	0.998729		9.42087	9.67135	9.1822	9.40093	9.46588	9.44441	9.34242	9.57593	9.16391	9.42591	9.10853	9.30766	9.45724	9.6053	9.14741
Cd151	ENSMUSG00000025510	ENSMUSG00000025510	-0.289676	0.714279	0.143435	0.995681	-0.138994	0.916961	0.108566	0.990293		8.45784	8.75334	8.91978	8.6963	8.35953	8.77174	9.18624	8.72311	8.62408	8.58031	8.50563	8.66804	9.07693	8.99029	8.97841
Soat1	ENSMUSG00000026600	ENSMUSG00000026600	0.0544794	0.977655	0.0560214	0.995681	0.0124669	0.994893	0.226478	0.95908		9.02592	9.0628	9.12985	8.92987	8.6441	8.95303	8.96591	9.02252	9.19	9.31617	9.06916	8.58608	8.96454	9.15248	8.93447
Stt3a	ENSMUSG00000032116	ENSMUSG00000032116	-0.0634997	0.977725	-0.163456	0.995681	0.0622985	0.985028	-0.432886	0.683954		8.04827	8.18602	8.71942	8.70945	8.94021	8.70342	8.42616	8.15538	8.29911	8.56618	8.38254	8.60343	8.69925	8.0315	8.45946
Dpy19l1	ENSMUSG00000043067	ENSMUSG00000043067	-0.0154636	0.995885	-0.240746	0.92692	0.0334141	0.988899	-0.121523	0.98912		8.17761	8.11203	8.86958	8.53141	8.52591	8.63556	8.53068	8.36294	8.33229	8.64898	8.76478	8.63187	8.39525	8.39992	8.57844
Nfib	ENSMUSG00000008575	ENSMUSG00000008575	-0.222695	0.682325	-0.293454	0.531323	-0.293362	0.364726	-0.247542	0.746342		8.81676	8.91635	8.97622	9.08114	9.26934	9.10851	9.24887	9.0423	9.29473	9.1508	9.267	9.17862	9.1414	9.00954	9.23022
Ugdh	ENSMUSG00000029201	ENSMUSG00000029201	0.0977988	0.943027	-0.109079	0.995681	0.0954346	0.944146	0.0594712	0.991778		8.44076	8.70382	8.97622	8.61481	8.76057	8.64709	8.77941	8.595	8.52914	8.93953	8.7524	8.82657	8.79855	8.51215	8.58252
Trip6	ENSMUSG00000023348	ENSMUSG00000023348	0.0670963	0.959224	0.173305	0.938299	0.111942	0.91226	0.0201872	0.993307		9.63873	9.72875	9.40856	9.48742	9.57047	9.66089	9.39875	9.5564	9.48803	9.45496	9.43903	9.36978	9.65038	9.63217	9.26358
Ccnd1	ENSMUSG00000070348	ENSMUSG00000070348	0.36121	0.72346	0.210612	0.993883	0.419729	0.590697	0.0213836	0.993307		8.21158	8.65255	8.86104	8.50451	8.51311	8.72534	8.33138	8.12389	8.10428	8.49708	8.37044	8.31849	8.73979	7.68665	8.12161
Ddr1	ENSMUSG00000003534	ENSMUSG00000003534	0.0686717	0.964183	0.00548615	0.995681	-0.156048	0.874546	-0.163825	0.967914		8.69239	8.5645	8.93614	8.95878	8.76777	8.98671	8.88024	9.04511	8.76269	8.60817	8.87448	8.72724	8.92113	8.57627	8.49879
Galnt1	ENSMUSG00000000420	ENSMUSG00000000420	-0.0394494	0.986904	0.0884612	0.995681	-0.0503189	0.984334	-0.0308251	0.993307		8.8857	8.83087	9.00945	9.00002	9.01171	8.80987	9.2251	8.92844	8.68407	8.77722	8.84273	8.85581	9.13888	8.97078	8.71458
Rab7	ENSMUSG00000079477	ENSMUSG00000079477	0.0846171	0.948833	0.0837177	0.995681	0.0660785	0.961738	0.0395216	0.992218		8.76738	9.03759	9.12272	8.94106	8.96549	8.94371	8.84948	9.12681	8.76963	8.945	8.90555	8.86782	8.99277	8.97918	8.72567
Map1lc3b	ENSMUSG00000031812	ENSMUSG00000031812	-0.260758	0.673674	-0.0252778	0.995681	-0.306784	0.475098	0.00150214	0.998729		9.04864	8.98203	9.04381	9.02125	9.14489	8.89617	9.25123	9.25831	9.47111	9.09774	8.97643	9.07469	8.95309	9.45693	9.39445
Birc6	ENSMUSG00000024073	ENSMUSG00000024073	-0.0408662	0.976793	-0.130127	0.991954	-0.0230425	0.988899	0.112879	0.975915		9.11115	9.32046	9.11197	9.16368	9.0268	9.00774	9.15891	9.22159	9.23332	9.34543	9.4274	9.15137	9.17874	9.25513	9.23282
Top2b	ENSMUSG00000017485	ENSMUSG00000017485	-0.0197244	0.992047	-0.144403	0.97682	0.0312688	0.986915	-0.241505	0.764796		8.76738	8.84755	8.87807	9.04841	9.22816	8.93119	8.83699	8.78482	8.78683	8.93953	8.89715	9.08502	8.96169	8.75636	8.83555
Bcap31	ENSMUSG00000002015	ENSMUSG00000002015	-0.0296828	0.990253	0.0265091	0.995681	-0.0788164	0.944146	-0.0397886	0.992218		9.01056	9.06993	9.12272	9.09723	8.98416	9.23873	9.29069	9.07286	9.07147	8.90063	9.06916	9.1494	9.06369	9.08667	9.15016
Mcl1	ENSMUSG00000038612	ENSMUSG00000038612	0.217622	0.879839	0.235712	0.986701	0.266503	0.820391	0.206232	0.971075		8.61329	8.59445	9.0133	8.46165	8.58009	8.62004	8.64257	8.66595	8.10976	8.93953	8.46828	8.03299	8.55524	8.46512	8.60672
Picalm	ENSMUSG00000039361	ENSMUSG00000039361	-0.121029	0.945168	-0.22482	0.982069	-0.0662772	0.981374	-0.171302	0.980471		8.01018	8.29339	8.70756	8.58374	8.6519	8.3877	8.69887	8.39407	8.18436	8.41665	8.49452	8.8437	8.66457	8.43289	8.37275
Dnajb1	ENSMUSG00000005483	ENSMUSG00000005483	0.292775	0.713281	0.536043	0.167959	0.435988	0.304021	0.402649	0.604399		8.99505	9.01193	9.10656	8.50451	8.85826	8.53981	8.62814	8.79485	8.36931	8.68212	8.26984	8.54479	8.63979	9.01772	8.54544
Med16	ENSMUSG00000013833	ENSMUSG00000013833	-0.140296	0.928584	-0.517485	0.374102	-0.362909	0.598896	-0.0529959	0.992218		8.8899	8.88842	8.22575	8.68304	8.63231	8.9026	8.92519	9.00534	9.208	9.31194	9.32247	8.95145	8.87334	9.06317	8.49447
Zfp706	ENSMUSG00000062397	ENSMUSG00000062397	0.0177518	0.993088	0.268022	0.724885	0.0318752	0.988797	0.220029	0.904327		8.94343	8.94763	9.14927	8.81294	8.85149	8.74337	8.91036	9.18645	8.85039	8.86644	8.57403	8.80924	8.97023	9.11741	8.91522
Slc6a6	ENSMUSG00000030096	ENSMUSG00000030096	-0.0439701	0.984235	-0.260729	0.861634	-0.31602	0.57192	-0.305782	0.7744		8.52961	8.74	8.71232	8.93435	9.04173	8.92804	8.80849	8.84721	9.24083	8.67226	8.99756	9.06846	8.72641	8.47306	8.89898
Ptpn1	ENSMUSG00000027540	ENSMUSG00000027540	-0.035831	0.979617	0.132627	0.986032	-0.0439085	0.977079	-0.0172423	0.993307		9.72121	9.8475	9.46177	9.63938	9.74663	9.70386	9.69537	9.7715	9.70083	9.55497	9.53788	9.54903	9.7612	9.76917	9.60732
Rab2a	ENSMUSG00000047187	ENSMUSG00000047187	-0.0385089	0.977453	0.0486493	0.995681	0.105655	0.908135	-0.00494412	0.9973		8.99894	8.96684	9.08289	9.09122	8.98416	8.99275	8.92814	8.93147	8.88595	9.07297	8.86876	8.96717	9.13128	9.13255	8.89571
Ndufa6	ENSMUSG00000022450	ENSMUSG00000022450	-0.298596	0.66774	-0.0266512	0.995681	-0.131951	0.916397	-0.156024	0.974212		8.45784	8.59445	8.85245	8.8371	8.68271	8.88971	8.98018	8.81142	8.51682	8.57326	8.55278	8.87973	9.069	8.93095	8.83213
Rhox5	ENSMUSG00000095180	ENSMUSG00000095180	0.0808739	0.965879	0.253651	0.948486	0.205712	0.867461	0.0735611	0.991778		9.37365	9.42694	9.04381	9.21066	9.26425	9.16844	9.3291	9.23639	8.57343	9.3077	8.88869	8.87021	9.43889	9.2482	8.87925
Wdr1	ENSMUSG00000005103	ENSMUSG00000005103	0.0301867	0.991488	0.0467267	0.995681	0.103928	0.937897	0.016567	0.993307		8.68757	8.85582	9.10294	8.77343	8.92419	8.95303	8.79241	8.94054	8.6431	8.81058	8.86014	8.88919	8.91819	8.67603	8.99989
Rif1	ENSMUSG00000036202	ENSMUSG00000036202	-0.115373	0.941894	-0.391598	0.602071	-0.17262	0.885574	-0.0697936	0.991778		8.70198	8.77965	8.58588	8.93659	8.91124	8.34585	8.74973	8.75086	9.05736	9.1928	9.16798	8.84855	8.56656	8.96516	8.84914
Ccl7	ENSMUSG00000035373	ENSMUSG00000035373	1.84281	0.569345	0.899898	0.993883	1.64673	0.592646	2.34975	0.403576		6.13364	5.44987	8.41557	4.70161	4.96013	5.40281	5.66453	5.58844	5.78937	6.38021	6.77986	5.84406	5.8156	3.15052	6.1499
Id1	ENSMUSG00000042745	ENSMUSG00000042745	0.473708	0.555524	0.116938	0.995681	0.346151	0.711939	0.240163	0.967914		8.14985	8.55437	8.86318	8.25843	8.54699	8.12719	8.10529	8.38524	8.1422	8.48586	8.50193	8.33588	8.42456	7.48136	8.20852
Ddx39a	ENSMUSG00000005481	ENSMUSG00000005481	0.0682076	0.965879	0.158297	0.993883	0.168872	0.877788	0.000153011	0.999918		8.42348	8.427	8.90947	8.76086	8.58825	8.47657	8.54611	8.44592	8.34628	8.54471	8.42994	8.40014	8.80174	8.42061	8.38212
Srsf6	ENSMUSG00000016921	ENSMUSG00000016921	0.154895	0.899386	0.0672682	0.995681	0.0696975	0.968258	-0.0801479	0.990293		8.2513	8.53391	8.90532	8.71467	8.78207	8.52738	8.6099	8.54832	8.4275	8.53023	8.46069	8.60343	8.65047	8.25074	8.4099
Hnrnpul1	ENSMUSG00000040725	ENSMUSG00000040725	0.142897	0.835561	0.128681	0.98619	0.0104821	0.99086	-0.0521077	0.990293		9.23521	9.23747	9.27672	9.19953	9.42547	9.28129	9.12077	9.34051	9.25326	9.1051	9.19338	9.07054	9.08482	9.08148	9.16109
Tomm70a	ENSMUSG00000022752	ENSMUSG00000022752	-0.0771981	0.965879	-0.14337	0.995681	0.206884	0.840213	0.140643	0.98912		8.10719	8.29339	8.84814	8.27974	8.35475	8.34585	8.34908	8.34484	8.07096	8.73993	8.51298	8.55967	8.70267	8.4165	8.49014
Tsc22d1	ENSMUSG00000022010	ENSMUSG00000022010	-0.00848011	0.995885	0.0931211	0.995681	0.0449013	0.985028	0.19271	0.966979		9.31549	9.14942	9.08472	8.99573	8.94657	9.03433	9.25358	9.14261	9.01127	9.20654	8.98967	9.07054	8.91229	9.54627	9.03598
Bmper	ENSMUSG00000031963	ENSMUSG00000031963	0.0327104	0.993088	-0.297056	0.982069	-0.0805418	0.985028	0.0971745	0.991778		8.51336	7.88851	8.24228	8.06746	8.27614	8.07121	8.04141	8.4586	8.41428	8.08116	8.32938	9.00898	7.54404	8.51985	8.37275
Cct4	ENSMUSG00000007739	ENSMUSG00000007739	0.018233	0.995885	0.0463808	0.995681	0.105899	0.967425	-0.100704	0.990293		7.7299	8.05572	8.82418	8.34857	8.42476	8.40138	8.39667	8.11857	8.0195	8.27611	8.30416	8.15562	8.56279	7.87236	8.30534
Esf1	ENSMUSG00000045624	ENSMUSG00000045624	0.141278	0.908642	-0.285936	0.82826	0.256737	0.733707	0.363802	0.713489		8.93125	8.95149	8.49774	8.47403	8.47841	8.3646	8.35348	8.36294	8.86343	9.07796	9.13261	9.04115	8.45328	8.73999	8.7692
U2surp	ENSMUSG00000032407	ENSMUSG00000032407	0.0479229	0.976793	-0.127087	0.995674	0.0838684	0.944146	-0.0635296	0.990293		8.48031	8.71295	8.89699	8.85614	8.75696	8.71442	8.69887	8.5796	8.6164	8.91464	8.83981	8.76882	8.83331	8.62344	8.52865
Srsf9	ENSMUSG00000029538	ENSMUSG00000029538	0.0852088	0.963295	0.074932	0.995681	0.162072	0.911578	0.0657214	0.992218		8.49141	8.34716	8.9341	8.57802	8.30612	8.75051	8.55757	8.64392	8.13147	8.58031	8.58104	8.48055	8.63264	8.29624	8.6578
Fkbp9	ENSMUSG00000029781	ENSMUSG00000029781	0.0180329	0.994843	-0.0701722	0.995681	-0.0522893	0.985028	-0.379484	0.654663		8.59797	8.90445	8.6908	9.01703	9.1028	9.21309	9.0816	8.76794	8.44061	8.83731	8.66597	8.90092	8.88544	8.72676	8.51593
Pcdh19	ENSMUSG00000051323	ENSMUSG00000051323	0.119438	0.944373	-0.0762905	0.995681	-0.0682233	0.980748	-0.0640374	0.992218		8.59797	8.37618	8.8949	8.71206	8.56363	8.83698	8.64972	8.66959	8.81394	8.55906	8.9387	8.6375	8.53234	8.10494	8.85252
Neurl1b	ENSMUSG00000034413	ENSMUSG00000034413	0.144171	0.931066	0.169056	0.995681	0.293177	0.780808	-0.160094	0.98912		8.9833	9.09109	8.68113	8.9828	9.0653	9.19749	8.79241	8.79818	8.24536	8.77107	8.55989	8.91719	9.17382	8.75962	8.27042
Ndfip1	ENSMUSG00000024425	ENSMUSG00000024425	-0.225972	0.721829	-0.307283	0.597636	-0.347931	0.308642	-0.231289	0.875677		8.83431	9.07702	8.62171	9.14445	9.09136	8.98973	9.31791	9.13473	9.11843	9.06796	9.14922	9.23534	8.94444	9.16969	9.0942
Gm4997	ENSMUSG00000045694	ENSMUSG00000045694	0.469951	0.788125	0.469684	0.91436	0.369214	0.840213	0.697015	0.706713		10.1952	9.93983	8.82856	9.03385	9.1282	9.04309	8.99992	9.69142	9.41025	9.1882	9.54507	9.11354	8.98436	9.42656	9.42879
Ndufa13	ENSMUSG00000036199	ENSMUSG00000036199	-0.172692	0.843611	0.00802978	0.995681	-0.255922	0.645855	0.0237822	0.993307		9.55655	9.37325	9.14927	9.19766	9.28949	9.51954	9.58206	9.59901	9.67335	9.30131	9.34737	9.41631	9.28301	9.7562	9.52928
Ptges3	ENSMUSG00000071072	ENSMUSG00000071072	-0.0739166	0.956186	-0.0058942	0.995681	-0.0820728	0.946783	-0.0165967	0.993307		9.21861	9.23747	9.08655	9.21988	9.1777	9.18962	9.18624	9.35188	9.24083	9.30557	9.12303	9.12159	8.98717	9.54249	9.17195
Cenpb	ENSMUSG00000068267	ENSMUSG00000068267	-0.133509	0.894787	-0.0640732	0.995681	-0.132205	0.896202	-0.125165	0.980471		9.37365	9.66431	9.10113	9.4813	9.51806	9.54853	9.517	9.55246	9.49851	9.44534	9.50137	9.41795	9.69916	9.4984	9.35214
Cluh	ENSMUSG00000020741	ENSMUSG00000020741	0.307338	0.701878	0.213616	0.961458	0.363075	0.515087	0.171578	0.971075		8.75822	9.03759	8.95029	8.86321	8.8481	8.51064	8.37091	8.73358	8.55748	8.6854	8.89995	8.52065	8.81445	8.7201	8.25008
Tmem176b	ENSMUSG00000029810	ENSMUSG00000029810	-0.130806	0.91046	-0.340604	0.609845	-0.162198	0.869029	-0.160172	0.967914		8.7628	8.72654	8.41557	8.75833	8.7497	8.87344	8.79886	8.67684	8.90499	8.74308	8.83688	9.27556	8.75636	8.79491	8.74397
Tex261	ENSMUSG00000014748	ENSMUSG00000014748	-0.167848	0.792798	0.00964475	0.995681	-0.144413	0.827969	-0.0669376	0.990293		9.08207	9.14268	9.14047	9.13669	9.0447	9.36981	9.31566	9.26072	9.22071	9.14606	9.0054	9.18055	9.26229	9.30049	9.30608
Fam221b	ENSMUSG00000043633	ENSMUSG00000043633	0.31057	0.83728	0.20439	0.995681	0.089653	0.980748	0.236781	0.977376		9.25489	9.33236	8.71469	8.95878	8.87836	8.82009	8.57272	8.97624	9.4257	8.59431	9.46011	8.50228	8.78892	8.50829	9.08848
Mrps6	ENSMUSG00000039680	ENSMUSG00000039680	-0.163762	0.860904	-0.0969364	0.995681	-0.102381	0.93969	0.0598274	0.990293		9.24836	8.9203	8.99975	8.95216	9.0653	8.98671	9.16891	9.22654	9.08822	9.2514	9.03636	9.17476	8.96169	9.48667	9.17195
Klc1	ENSMUSG00000021288	ENSMUSG00000021288	0.264288	0.792798	0.186825	0.993883	0.40606	0.452769	0.0185327	0.993307		8.52421	8.75334	8.76819	8.72506	8.75333	8.51904	8.33138	8.38966	8.12607	8.37266	8.41038	8.70063	8.82391	8.08951	8.26029
Dctn2	ENSMUSG00000025410	ENSMUSG00000025410	-0.0751254	0.965004	0.122556	0.995681	-0.121929	0.939283	-0.0319506	0.993307		9.55919	9.43248	8.85245	9.48283	9.22816	9.28376	9.35999	9.43121	9.48593	9.23585	9.15863	9.15529	9.26692	9.6533	9.17195
Scd2	ENSMUSG00000025203	ENSMUSG00000025203	-0.0305862	0.991488	0.155338	0.993883	0.117826	0.916943	-0.121235	0.982436		9.21861	9.32939	8.99195	9.30374	9.28448	9.31783	8.99992	9.17881	9.00834	9.06545	8.94415	9.06846	9.48533	9.13003	8.96911
Ahcyl1	ENSMUSG00000027893	ENSMUSG00000027893	-0.0457341	0.991157	-0.103289	0.995681	0.0155388	0.994893	-0.104318	0.990293		7.84689	8.38192	8.83075	8.41427	8.648	8.5022	8.24893	8.66959	8.25528	8.48961	8.43382	8.63469	8.57778	8.33163	8.47707
Elavl1	ENSMUSG00000040028	ENSMUSG00000040028	0.0886083	0.959886	0.0187795	0.995681	0.17562	0.880553	0.0379479	0.993165		8.43502	8.65728	8.91154	8.74307	8.74241	8.44168	8.54611	8.53641	8.45789	8.78944	8.83981	8.33242	8.82077	8.37469	8.57026
Tardbp	ENSMUSG00000041459	ENSMUSG00000041459	0.0222429	0.994696	-0.120622	0.995681	-0.112464	0.951899	-0.0911496	0.990293		8.11439	8.17284	8.76819	8.46785	8.55533	8.42837	8.70232	8.57184	8.1947	8.51191	8.32938	8.67625	8.57031	8.04755	8.45058
Tmem158	ENSMUSG00000054871	ENSMUSG00000054871	0.0687059	0.965879	0.199432	0.950864	0.0734093	0.965507	0.0799334	0.990293		9.18139	9.12227	9.0975	9.02547	9.03875	9.09735	9.08952	9.20162	8.8699	9.02469	8.88869	8.88919	9.38878	9.04729	8.6655
Psmd14	ENSMUSG00000026914	ENSMUSG00000026914	0.154306	0.943027	-0.00811488	0.995681	0.355782	0.749506	0.123971	0.990293		7.77603	7.89654	8.68838	8.1469	7.9424	8.11062	8.03048	7.70158	7.77247	8.06114	8.21227	8.31498	8.31702	7.48136	8.19261
Fasn	ENSMUSG00000025153	ENSMUSG00000025153	-0.0204239	0.993753	0.09605	0.995681	0.0102088	0.994893	0.15678	0.980471		9.70461	9.76212	9.16669	9.40255	9.45477	9.36283	9.53063	9.67522	9.44317	9.58507	9.53788	9.26107	9.4972	9.88389	9.30608
Maf	ENSMUSG00000055435	ENSMUSG00000055435	-0.500887	0.205731	-0.649286	0.0453803	-0.709551	0.0107003	-0.783059	0.00485241		7.93084	8.13937	7.89865	8.84665	8.81372	8.61613	9.02492	8.46699	8.50855	8.70165	8.53121	8.65423	8.67855	8.28274	8.46389
Jak1	ENSMUSG00000028530	ENSMUSG00000028530	0.0921099	0.938459	-0.0235358	0.995681	-0.0467352	0.981374	0.0308967	0.993165		9.01056	9.00822	9.09568	9.01703	8.96549	9.046	8.88632	9.11618	9.23833	9.09774	9.20251	8.87735	8.74312	9.0526	9.03301
Phldb2	ENSMUSG00000033149	ENSMUSG00000033149	-0.0343074	0.991488	-0.213332	0.949477	0.0829467	0.959691	-0.0101932	0.995331		8.52421	8.51837	8.69561	8.58944	8.64018	8.55622	8.28616	8.6365	8.56548	8.69842	8.68237	8.98492	8.21527	8.81381	8.75844
Gm8996	ENSMUSG00000114754	ENSMUSG00000114754	-0.579192	0.814175	-0.334328	0.995681	-0.380109	0.909275	-0.536832	0.966979		7.2176	7.31167	8.278	8.25843	8.11608	8.28316	8.75638	7.92509	7.00675	8.20035	7.78408	8.04996	8.64692	8.14528	7.89146
Tmem59	ENSMUSG00000028618	ENSMUSG00000028618	-0.100105	0.956784	-0.298099	0.88685	-0.204266	0.859469	-0.420443	0.683954		8.12155	8.13258	8.45014	8.71988	8.69787	8.57244	8.51116	8.28441	8.5454	8.2674	8.46449	8.83638	8.53234	7.91382	8.52018
Txn2	ENSMUSG00000005354	ENSMUSG00000005354	0.102583	0.943027	0.162223	0.993883	0.171296	0.859646	0.0780091	0.990293		9.44391	9.55939	9.11556	9.42504	9.28448	9.18436	9.23466	9.17626	9.21818	9.39625	9.34325	8.86542	9.45521	9.22014	9.13914
Rtf1	ENSMUSG00000027304	ENSMUSG00000027304	-0.192872	0.74738	-0.238059	0.725328	-0.200654	0.69212	-0.192907	0.920649		8.86877	8.71295	8.85245	8.97846	9.07694	8.9623	8.98302	8.95254	9.10203	9.01171	9.0054	9.12959	8.89743	9.17457	8.92809
Trip12	ENSMUSG00000026219	ENSMUSG00000026219	0.0234032	0.991488	0.064921	0.995681	0.0959538	0.937415	0.0009468	0.998797		9.07102	8.8434	8.99195	9.06691	8.92097	8.91538	9.01109	8.76794	8.84054	9.02985	8.79827	8.88683	9.10047	8.93095	8.79751
Efemp1	ENSMUSG00000020467	ENSMUSG00000020467	0.178224	0.943027	-0.382458	0.922954	-0.173893	0.944146	-0.34549	0.966979		7.77603	7.13273	8.34995	8.23681	8.17685	8.14899	7.97456	7.84367	8.21518	7.80242	8.14758	8.6063	7.86436	7.07443	7.93671
Papola	ENSMUSG00000021111	ENSMUSG00000021111	0.112506	0.928011	0.0642941	0.995681	0.10348	0.93969	0.0185991	0.993307		8.55099	8.61894	8.95832	8.64249	8.66353	8.82349	8.73298	8.57573	8.56548	8.659	8.55634	8.77138	8.72977	8.34468	8.7476
Ctbp1	ENSMUSG00000037373	ENSMUSG00000037373	-0.0306153	0.992047	-0.0535728	0.995681	0.0962011	0.959191	-0.0639328	0.992218		8.22494	8.36464	8.73118	8.58374	8.6004	8.3877	8.40516	8.48776	8.19985	8.54111	8.30839	8.67625	8.86114	8.18936	8.34424
Eny2	ENSMUSG00000022338	ENSMUSG00000022338	-0.0450948	0.991157	-0.00155704	0.999777	-0.000934728	0.999106	-0.216347	0.967914		8.01018	8.31154	8.77275	8.55781	8.77851	8.52322	8.45505	8.23122	8.52914	8.27176	8.37449	8.56853	8.72977	8.0207	8.52442
Rps3a1	ENSMUSG00000028081	ENSMUSG00000028081	-0.159145	0.965879	0.00641597	0.998366	-0.101535	0.986683	-0.223262	0.990293		7.60258	7.41599	8.56763	8.05515	8.24551	8.23812	8.69195	7.78448	7.38665	8.09107	7.74088	8.0115	8.4894	7.71373	8.04693
Eif1a	ENSMUSG00000057561	ENSMUSG00000057561	0.296197	0.807196	0.230818	0.993883	0.363843	0.678885	0.152035	0.98912		8.08537	8.01201	8.81315	8.1661	8.266	8.20728	8.21071	8.05321	7.70167	8.02543	8.29992	8.06672	8.12122	7.75343	8.29048
Crlf1	ENSMUSG00000007888	ENSMUSG00000007888	-0.255717	0.714279	-0.363805	0.503108	-0.299694	0.550328	-0.473705	0.185405		8.48031	8.51837	8.353	8.93211	8.8172	8.99576	8.69887	8.73705	8.79706	8.47077	8.83688	9.05172	8.62904	8.70668	8.76562
Eprs	ENSMUSG00000026615	ENSMUSG00000026615	0.0874985	0.951761	0.0513191	0.995681	0.0462078	0.985028	0.257236	0.884634		9.93146	9.90838	9.24918	9.46279	9.457	9.47924	9.61352	9.62174	9.78714	9.68982	9.63882	9.6842	9.5031	9.7562	9.63503
Kdm2a	ENSMUSG00000054611	ENSMUSG00000054611	-0.109537	0.926242	0.0966504	0.995681	-0.179733	0.831321	0.00150996	0.998729		9.24836	9.09459	9.18733	9.11116	9.15041	9.26641	9.517	9.28227	9.25573	9.24031	9.15863	8.81917	9.04223	9.30049	9.48645
Ube2l3	ENSMUSG00000038965	ENSMUSG00000038965	-0.275832	0.490658	-0.115943	0.993883	-0.103015	0.915919	-0.117825	0.974212		9.08207	9.27803	9.06998	9.21066	9.29946	9.27387	9.26761	9.18645	9.28266	9.3822	9.25389	9.13357	9.25065	9.55378	9.43331
Bclaf1	ENSMUSG00000037608	ENSMUSG00000037608	-0.0474115	0.969713	-0.160669	0.938299	0.0483273	0.974486	0.120499	0.972015		9.31549	9.32344	9.0133	9.05666	9.1254	9.11129	9.11043	9.15304	9.24083	9.42591	9.3678	9.3356	9.11081	9.36597	9.30361
Rbfox2	ENSMUSG00000033565	ENSMUSG00000033565	0.177907	0.812248	0.274222	0.678754	0.231581	0.649333	0.236193	0.824721		9.78124	9.68765	9.45894	9.26153	9.43229	9.52788	9.29298	9.45881	9.48382	9.43176	9.36577	9.31645	9.44707	9.64453	9.28624
Tcerg1	ENSMUSG00000024498	ENSMUSG00000024498	-0.110256	0.904898	-0.245307	0.750896	-0.194266	0.733707	-0.0390476	0.992218		9.08207	9.17608	8.94019	9.07709	9.16138	9.0719	9.06563	9.26313	9.4235	9.32669	9.3979	9.19587	9.07957	9.28477	9.15016
Eif4e2	ENSMUSG00000026254	ENSMUSG00000026254	-0.127277	0.903543	0.055973	0.995681	-0.120257	0.915919	0.14671	0.967914		9.27431	9.34709	9.02673	9.20325	8.8916	9.09735	9.32016	9.39429	9.29473	9.35163	9.09389	9.02193	9.33686	9.52349	9.14466
Rab11a	ENSMUSG00000004771	ENSMUSG00000004771	-0.0482847	0.985476	-0.0675617	0.995681	-0.102235	0.953044	-0.0905185	0.990293		8.09995	8.34128	8.82856	8.63975	8.63625	8.3785	8.55757	8.53241	8.6164	8.61162	8.55634	8.43284	8.78892	8.29624	8.41447
Thbd	ENSMUSG00000074743	ENSMUSG00000074743	0.581945	0.664605	0.00499365	0.998337	0.425883	0.783347	0.433687	0.950349		7.29568	7.22497	8.59105	7.22685	7.43694	7.63463	7.64265	7.41979	7.2544	7.79031	8.11412	7.63796	7.00434	7.02123	7.73923
Tor1b	ENSMUSG00000026848	ENSMUSG00000026848	0.0423818	0.981107	0.10602	0.995681	-0.0834001	0.946219	0.131237	0.977376		9.41505	9.43524	9.25896	9.24357	9.23857	9.23364	9.39662	9.43335	9.52336	9.35984	9.3979	9.00681	9.07957	9.53682	9.32808
Klf6	ENSMUSG00000000078	ENSMUSG00000000078	0.558774	0.0200437	0.309389	0.609845	0.565761	0.0191624	0.561639	0.0297353		8.93532	8.99331	8.97227	8.44288	8.59636	8.15976	8.44685	8.33571	8.43625	8.73678	8.76478	8.46798	8.51298	8.27367	8.44611
Tmbim6	ENSMUSG00000023010	ENSMUSG00000023010	0.167948	0.902328	0.129656	0.995681	0.130905	0.93969	-0.0329016	0.993307		8.62342	8.69924	8.93002	8.66695	8.91449	8.79266	8.68151	8.62155	8.58921	8.5519	8.62583	8.714	8.74644	7.97666	8.9055
Cyc1	ENSMUSG00000022551	ENSMUSG00000022551	-0.202736	0.875026	0.0188775	0.995681	-0.0405261	0.988899	-0.0886452	0.990293		8.78102	8.72654	8.80427	8.74307	8.84129	8.98671	9.03862	8.9733	8.31816	8.82845	8.69212	8.73513	9.34126	8.82627	8.6578
Pea15a	ENSMUSG00000013698	ENSMUSG00000013698	0.22633	0.836523	0.251493	0.922954	0.189067	0.867461	0.228646	0.966979		9.98546	9.91235	9.36392	9.4813	9.61707	9.54237	9.23704	9.77657	9.69173	9.4872	9.73158	9.32866	9.46532	9.77078	9.38282
Immt	ENSMUSG00000052337	ENSMUSG00000052337	-0.187226	0.714279	0.0148739	0.995681	0.0903746	0.916966	0.127716	0.967914		9.26139	9.33827	9.1822	9.08921	9.15591	9.15234	9.2251	9.18136	9.09652	9.24697	9.3678	9.1095	9.39725	9.48863	9.44678
Dynll1	ENSMUSG00000009013	ENSMUSG00000009013	0.0306515	0.991488	0.136674	0.995681	0.0308611	0.988899	-0.0224747	0.993307		8.62342	8.77965	8.93206	8.84188	8.80325	8.78572	8.89839	8.71256	8.65064	8.77415	8.5203	8.65423	9.06369	8.4165	8.72198
Zfr	ENSMUSG00000022201	ENSMUSG00000022201	-0.0691351	0.961849	0.0120246	0.995681	0.0179805	0.989047	0.0894313	0.990293		9.33719	9.4186	9.05882	9.22721	9.26934	9.0489	9.02216	9.31518	9.4058	9.2224	9.30775	9.25559	9.33024	9.51389	9.16109
Zbtb38	ENSMUSG00000040433	ENSMUSG00000040433	0.140808	0.911024	-0.172667	0.993883	0.0733807	0.968258	-0.0147985	0.994176		8.09995	8.45992	8.75903	8.47403	8.49587	8.5022	8.35348	8.47533	8.37842	8.52658	8.70181	8.70331	8.05314	8.39992	8.52018
Col6a2	ENSMUSG00000020241	ENSMUSG00000020241	-0.0101966	0.995885	0.109981	0.995681	-0.135544	0.913096	0.0813874	0.990293		9.26786	8.95535	8.92798	9.06487	8.83787	9.00774	9.03041	9.03386	9.46257	8.73993	8.94143	9.12759	8.92113	9.10724	9.15837
Rock2	ENSMUSG00000020580	ENSMUSG00000020580	-0.0420448	0.986241	-0.357974	0.603706	-0.132526	0.916943	0.0346929	0.993165		8.94747	8.61894	8.58329	8.77093	8.6004	8.68115	8.77941	8.74052	9.02293	9.05537	9.16798	9.00246	8.45734	8.71675	9.05663
Tnpo2	ENSMUSG00000031691	ENSMUSG00000031691	0.141503	0.922802	0.118642	0.995681	0.0261577	0.989047	0.108816	0.990293		9.63873	9.68765	9.05695	9.39931	9.43907	9.28129	9.02492	9.66977	9.59543	9.4376	9.38193	9.27195	9.16888	9.57424	9.25084
Ndufa12	ENSMUSG00000020022	ENSMUSG00000020022	0.169843	0.921466	0.161504	0.995681	0.117524	0.956453	0.200663	0.980471		9.83016	9.63098	8.83075	9.36649	9.35789	9.1196	8.99431	9.38989	9.64909	9.42786	9.37387	9.16116	9.22707	9.60891	9.05663
Loxl1	ENSMUSG00000032334	ENSMUSG00000032334	-0.336225	0.713019	-0.29221	0.896556	-0.599134	0.124079	-0.463561	0.590766		8.36432	8.17945	8.14715	8.86321	8.56776	8.61221	8.67801	8.60263	9.13195	8.02025	8.70181	8.72724	8.62544	8.47306	8.58658
Cops9	ENSMUSG00000073616	ENSMUSG00000073616	-0.00613222	0.995885	0.184212	0.921832	0.00805987	0.994893	0.0858989	0.989259		9.19164	9.29028	9.11376	9.09523	8.96235	9.26392	9.20337	9.23147	9.13195	8.97205	8.90555	9.15137	9.15145	9.3766	9.06247
Gm14923	ENSMUSG00000082636	ENSMUSG00000082636	-0.246245	0.830667	0.0580466	0.995681	-0.109183	0.951725	-0.168224	0.980471		8.28997	8.55437	8.74981	8.66965	8.70163	8.77525	8.90439	8.66595	8.34628	8.63212	8.36639	8.46482	9.12874	8.76933	8.38212
Skp1	ENSMUSG00000036309	ENSMUSG00000036309	0.149606	0.894787	0.18288	0.975477	0.216698	0.783347	0.0858366	0.990293		8.54567	8.90445	8.86958	8.88886	8.61245	8.5684	8.48738	8.65498	8.56548	8.49708	8.7586	8.54479	8.86114	8.51215	8.50738
Aldh2	ENSMUSG00000029455	ENSMUSG00000029455	0.444055	0.508862	0.458833	0.579209	0.364401	0.629411	0.465216	0.642558		10.1969	10.1308	9.28313	9.37477	9.53925	9.45757	9.27225	9.71274	9.65285	9.35779	9.58923	9.43742	9.46128	9.71156	9.22241
Vdac1	ENSMUSG00000020402	ENSMUSG00000020402	0.0276652	0.991157	0.153459	0.951528	0.0684289	0.952877	0.213707	0.850935		9.31237	9.17277	9.2144	8.94551	9.05944	9.06044	9.15639	9.18899	9.15068	9.04266	9.13499	9.06429	9.42859	9.04729	9.11122
Rsrc2	ENSMUSG00000029422	ENSMUSG00000029422	-0.261101	0.681503	-0.244842	0.82826	-0.0591649	0.96879	-0.065262	0.990293		8.73971	8.68074	8.80427	8.88191	8.76777	8.77174	8.85569	8.68406	8.86343	9.16024	9.01838	8.76112	8.7662	9.15495	9.06247
Gm5781	ENSMUSG00000111966	ENSMUSG00000111966	0.224395	0.929012	0.347018	0.993092	0.0938381	0.985028	0.371134	0.967914		10.2648	10.0156	8.99195	9.40901	9.3745	9.64564	9.58393	9.7596	9.90999	9.36801	9.8939	9.15137	9.36089	9.57054	9.89947
Larp4	ENSMUSG00000023025	ENSMUSG00000023025	-0.0524894	0.976793	0.0154625	0.995681	0.102905	0.93969	0.0299072	0.993307		8.9833	9.16946	9.01138	9.04841	8.89489	9.12511	9.11302	9.01109	8.70594	9.27114	9.04145	8.77138	9.14392	9.1867	8.98458
Gsk3b	ENSMUSG00000022812	ENSMUSG00000022812	0.106804	0.929012	0.0760865	0.995681	0.0471064	0.985028	-0.0527845	0.992218		9.74923	9.62616	9.22442	9.57189	9.64667	9.57091	9.48333	9.29647	9.68624	9.58683	9.52884	9.27376	9.33024	9.50035	9.47773
Atp6v1a	ENSMUSG00000052459	ENSMUSG00000052459	0.254873	0.72546	0.0114528	0.995681	0.102822	0.940555	0.224196	0.944108		8.51879	8.69924	8.89908	8.53437	8.52165	8.43726	8.65685	8.3719	8.79706	8.61848	8.90276	8.58899	8.52849	8.31846	8.54961
Psma4	ENSMUSG00000032301	ENSMUSG00000032301	-0.00134497	0.99911	0.0540521	0.995681	-0.040669	0.988289	0.278625	0.880696		9.69504	9.49997	9.17015	9.05872	9.3314	9.16844	9.30209	9.49208	9.69902	9.6197	9.22731	9.36301	9.25065	9.62148	9.50588
Apbb1ip	ENSMUSG00000026786	ENSMUSG00000026786	-0.195031	0.830667	-0.482733	0.146904	-0.224876	0.749602	-0.375285	0.532738		8.07803	8.13258	8.48111	8.66965	8.74606	8.44168	8.58771	8.41156	8.42311	8.73993	8.69859	8.75596	8.42041	8.60186	8.3004
Ndufb5	ENSMUSG00000027673	ENSMUSG00000027673	-0.386771	0.481254	-0.0914912	0.995681	-0.335113	0.561839	-0.228162	0.95908		8.22494	8.2312	8.77502	8.61481	8.66353	8.73978	9.01663	8.74052	8.53729	8.40876	8.56698	8.62623	8.74644	8.81068	8.92809
Bub3	ENSMUSG00000066979	ENSMUSG00000066979	-0.0140358	0.995821	-0.00944488	0.995681	-0.0220016	0.989047	-0.0207302	0.993307		8.31518	8.55437	8.87807	8.7042	8.62043	8.5684	8.74973	8.5244	8.62025	8.57679	8.69859	8.58899	8.77273	8.51601	8.57844
Myo1c	ENSMUSG00000017774	ENSMUSG00000017774	-0.0316453	0.984235	0.14777	0.949477	-0.052709	0.967574	0.00261025	0.998278		9.1467	9.43524	9.18904	9.23268	9.30442	9.23619	9.36869	9.31052	9.25573	9.10265	9.13022	9.10748	9.26923	9.41835	9.17465
Eif4e	ENSMUSG00000028156	ENSMUSG00000028156	0.199245	0.843611	-0.0975291	0.995681	0.16862	0.874345	0.0809763	0.990293		8.20485	8.32946	8.75673	8.50451	8.22473	8.39684	8.29988	8.34028	8.24536	8.57679	8.72416	8.35648	8.31702	8.336	8.13277
Atp6ap1	ENSMUSG00000019087	ENSMUSG00000019087	0.0190039	0.995821	-0.0626422	0.995681	-0.0224232	0.989428	0.158364	0.98912		9.58533	9.34122	8.61664	9.15602	9.02379	9.0314	9.06831	9.18645	9.47111	9.2536	9.29713	9.32344	8.79214	9.35095	9.41287
Hsd17b12	ENSMUSG00000027195	ENSMUSG00000027195	0.0495235	0.98042	-0.089575	0.995681	0.067577	0.968258	-0.0434396	0.992218		9.42087	9.26256	8.96431	9.10918	9.36977	9.3106	8.93401	9.31285	9.19517	9.30557	9.33082	9.29881	8.88544	9.43269	9.15016
Cggbp1	ENSMUSG00000054604	ENSMUSG00000054604	0.10672	0.95249	-0.0584964	0.995681	0.00850949	0.996567	-0.301997	0.920649		8.02553	8.2312	8.61918	8.69366	8.67123	8.48944	8.50722	8.30328	8.10428	8.56973	8.28281	8.27225	8.43282	8.33163	7.81042
Hmgb2	ENSMUSG00000054717	ENSMUSG00000054717	-0.392779	0.237431	-0.275189	0.724885	-0.227522	0.695749	0.0318217	0.993165		9.09669	8.98203	8.74052	8.87726	8.79974	9.04018	9.03589	9.06182	9.37655	9.26677	9.2517	9.11958	9.20069	9.37448	9.40829
Sec11c	ENSMUSG00000024516	ENSMUSG00000024516	-0.0542957	0.991488	-0.0583502	0.995681	-0.132946	0.968258	-0.282673	0.977954		7.35766	7.09132	8.55445	8.04274	8.08759	8.19686	8.26766	7.83072	7.73041	7.80844	7.80819	8.03725	8.31702	7.2877	7.87162
Psma6	ENSMUSG00000021024	ENSMUSG00000021024	0.153693	0.894787	0.179656	0.986701	0.266482	0.682267	0.0665066	0.990293		8.66814	8.83923	8.94424	8.75833	8.72031	8.79957	8.67451	8.79151	8.13685	8.69842	8.64938	8.59478	8.77923	8.53511	8.6959
Spcs1	ENSMUSG00000021917	ENSMUSG00000021917	-0.168976	0.926242	-0.091275	0.995681	-0.103744	0.967425	-0.204948	0.980471		7.88948	7.83933	8.62927	8.40783	8.43384	8.29787	8.4713	8.10788	8.24038	8.19576	8.09954	8.48055	8.60364	7.81099	8.50309
Dnajc1	ENSMUSG00000026740	ENSMUSG00000026740	-0.33909	0.360587	-0.504205	0.0525027	-0.333377	0.353967	-0.0849864	0.990293		8.46349	8.41026	8.56763	8.51653	8.59636	8.60039	8.80849	8.69481	8.93616	9.04521	9.0028	8.90792	8.5815	8.85696	8.99989
Xist	ENSMUSG00000086503	ENSMUSG00000086503	-0.34854	0.62908	-0.457279	0.408759	-0.418191	0.374406	-0.501219	0.33849		7.97897	7.95927	8.47833	8.74818	8.71659	8.52738	8.51116	8.43741	8.78683	8.52658	8.70181	8.6403	8.28084	8.49274	8.74397
Bpnt2	ENSMUSG00000066324	ENSMUSG00000066324	-0.0578247	0.973133	-0.000697067	0.999777	-0.0531624	0.981374	-0.0189143	0.993307		8.69239	8.56953	8.90532	8.77593	8.65967	8.82009	8.72622	8.79151	8.84383	8.41271	9.00018	8.73513	8.67855	8.77898	8.91199
Ppp1cb	ENSMUSG00000014956	ENSMUSG00000014956	0.12068	0.956106	0.13792	0.995681	0.185681	0.916943	-0.12112	0.990293		7.89785	8.00459	8.51417	8.53437	8.09333	8.20728	8.20586	8.00792	7.71611	8.03059	7.7028	8.31147	8.39947	7.73372	7.94938
Gm43501	ENSMUSG00000106814	ENSMUSG00000106814	-0.375111	0.721829	0.0298535	0.995681	-0.378455	0.690536	-0.253827	0.967914		7.91444	8.21201	8.51689	8.52547	8.30117	8.63169	8.97164	8.7196	7.98414	8.44782	8.08974	8.07088	8.85807	8.56887	8.36804
Ndufb8	ENSMUSG00000025204	ENSMUSG00000025204	0.0107493	0.995885	0.0318294	0.995681	-0.126515	0.902042	0.0378425	0.992218		9.25489	9.23113	9.02099	9.14832	9.29698	8.92172	9.20337	9.39649	9.27536	9.09529	9.12543	9.18631	9.1414	9.3336	8.97222
Pgrmc2	ENSMUSG00000049940	ENSMUSG00000049940	0.0132511	0.995885	-0.00264544	0.998686	-0.0869257	0.959691	0.109756	0.990293		9.4778	9.35295	8.97425	9.09723	9.14212	9.26641	9.08952	9.37881	9.58563	9.14368	9.4274	9.25924	8.94733	9.54438	9.24315
Smchd1	ENSMUSG00000024054	ENSMUSG00000024054	-0.28731	0.590458	-0.307575	0.604898	-0.270821	0.580372	-0.0782833	0.990293		8.53498	8.74891	8.7886	8.80317	8.78916	8.73619	8.87108	8.81799	9.18742	9.08045	9.11338	8.80425	8.94733	9.02854	8.97532
Mrpl18	ENSMUSG00000057388	ENSMUSG00000057388	-0.0813731	0.951761	0.0500826	0.995681	-0.000363379	0.999531	0.0731654	0.990293		8.87726	8.94376	8.87383	8.97846	8.56363	8.89295	8.83071	9.05905	8.79025	8.91743	8.78315	8.84126	8.90933	9.19394	8.80101
Mcm5	ENSMUSG00000005410	ENSMUSG00000005410	-0.2014	0.752943	0.0298557	0.995681	-0.100417	0.926537	0.0316242	0.992218		9.18139	9.37612	9.04945	9.16559	9.19115	9.16041	9.42193	9.35641	9.11298	9.2863	9.08158	9.14743	9.49128	9.44284	9.26612
Ythdf2	ENSMUSG00000040025	ENSMUSG00000040025	0.0422714	0.984235	0.137036	0.995681	0.115716	0.932952	0.0499399	0.992218		8.56682	8.72654	8.97622	8.64523	8.78562	8.74337	8.89538	8.56795	8.47922	8.78944	8.6122	8.50228	8.79855	8.78537	8.60271
Trim35	ENSMUSG00000022043	ENSMUSG00000022043	0.200059	0.904898	0.224392	0.993883	0.104088	0.968258	-0.0106511	0.996997		7.82073	7.7176	8.70994	8.12745	8.12732	8.28316	8.1311	7.93722	8.12607	8.04595	7.8201	7.97199	8.31702	7.69347	7.83111
Gm11675	ENSMUSG00000082272	ENSMUSG00000082272	-0.397435	0.666868	0.110714	0.995681	-0.359196	0.678885	-0.0223642	0.993307		8.92308	9.17277	8.34077	8.79332	8.83101	8.97456	9.32687	9.32905	8.91127	9.02727	8.72733	8.38685	9.1414	9.5254	8.99989
1110038B12Rik	ENSMUSG00000092203	ENSMUSG00000092203	0.472553	0.690373	0.116781	0.995681	0.350259	0.796912	0.0760684	0.992218		7.62292	7.61418	8.54382	8.18505	7.62315	7.93357	7.73978	7.74362	7.49948	7.80242	7.95041	7.92679	7.72322	6.9318	7.83111
Cdt1	ENSMUSG00000006585	ENSMUSG00000006585	0.293437	0.752943	0.132705	0.995681	0.291166	0.720504	0.142284	0.98912		8.02553	8.11203	8.77502	8.19256	8.10475	8.35056	8.15142	8.01366	8.04832	8.17728	8.35416	8.14776	8.22482	7.95412	8.01715
Anxa1	ENSMUSG00000024659	ENSMUSG00000024659	0.781087	0.72269	0.540398	0.98619	0.667995	0.782161	0.323962	0.98912		7.28295	7.57466	8.50323	7.5233	7.49884	7.68771	7.33149	7.00158	7.35009	7.22434	7.1156	7.6767	7.26728	5.69548	7.73923
Srm	ENSMUSG00000006442	ENSMUSG00000006442	-0.0871448	0.936641	0.0067865	0.995681	-0.126453	0.885574	0.0659398	0.990293		9.43243	9.3961	9.0975	9.32268	9.08849	9.30576	9.41984	9.48177	9.40357	9.39025	9.34531	9.167	9.36521	9.52157	9.29122
Sgta	ENSMUSG00000004937	ENSMUSG00000004937	-0.130386	0.930833	0.0295599	0.995681	-0.148379	0.917466	0.238947	0.966979		9.49169	9.12227	8.81315	8.86086	8.7314	9.15503	9.26993	9.18899	9.46043	9.18589	9.02354	9.18631	8.91819	9.54249	9.34975
Rnf187	ENSMUSG00000020496	ENSMUSG00000020496	-0.0937919	0.933333	0.130533	0.993883	0.0101285	0.994893	0.0805859	0.990293		9.3856	9.25945	9.10836	9.15025	9.13934	9.2234	9.14884	9.34962	9.21818	9.1882	9.11096	9.06429	9.28986	9.59259	9.10557
Postn	ENSMUSG00000027750	ENSMUSG00000027750	-0.288725	0.799255	-0.651535	0.144129	-0.0840262	0.968258	-0.42485	0.746342		7.76692	7.77975	8.09349	8.30767	8.46519	8.15439	7.99156	7.69445	8.20498	8.3231	8.50563	8.75078	8.13648	7.79839	8.52018
Pgd	ENSMUSG00000028961	ENSMUSG00000028961	0.0816308	0.945168	0.160327	0.961861	0.0863293	0.940423	0.117203	0.980471		9.45529	9.47872	9.23107	9.24537	9.25403	9.31543	9.26761	9.43121	9.19774	9.35163	9.20023	9.12759	9.35002	9.45292	9.09134
Cdh11	ENSMUSG00000031673	ENSMUSG00000031673	-0.0283255	0.993088	-0.449265	0.679101	-0.302252	0.783347	-0.405883	0.78039		8.20485	8.07001	8.33152	8.49543	8.76418	8.56029	8.29532	8.14496	8.9515	8.46697	8.83688	8.63187	8.02608	7.94844	8.63837
Gdi2	ENSMUSG00000021218	ENSMUSG00000021218	-0.140623	0.901679	-0.152671	0.993883	-0.0905167	0.950437	-0.121292	0.98912		8.23158	8.33538	8.70279	8.66155	8.51311	8.52322	8.64972	8.45016	8.50855	8.60472	8.47206	8.71133	8.76293	8.38315	8.59467
Gm11478	ENSMUSG00000083992	ENSMUSG00000083992	0.0856182	0.950371	0.17349	0.968228	0.0910086	0.944146	0.151771	0.967914		9.25163	9.29637	9.04003	9.11709	8.95606	9.05468	9.29526	9.11884	8.8699	9.09774	8.96843	9.00246	9.23419	9.19394	8.87594
Ssr1	ENSMUSG00000021427	ENSMUSG00000021427	0.170654	0.860904	0.0698319	0.995681	0.0981047	0.943935	0.0576558	0.991778		8.75361	8.8434	8.75212	8.81051	8.76418	8.58848	8.70232	8.64761	8.70594	8.41665	8.70823	8.95821	8.55902	8.79174	8.46829
St3gal5	ENSMUSG00000056091	ENSMUSG00000056091	-0.501563	0.573647	-0.470046	0.72441	-0.385565	0.695749	0.046461	0.993307		8.46349	7.92825	7.70708	8.0176	7.95507	8.07121	8.20586	8.54039	8.55347	8.4821	8.1895	8.82903	7.99292	8.96234	8.55376
Eva1b	ENSMUSG00000050212	ENSMUSG00000050212	-0.206962	0.789641	0.01725	0.995681	-0.361125	0.307246	-0.274528	0.766588		9.02592	9.01193	8.70279	9.20139	9.20182	9.15503	9.12592	9.11083	9.53969	8.90063	8.83981	8.94693	9.1414	9.18912	9.02105
Atp5h	ENSMUSG00000034566	ENSMUSG00000034566	0.153739	0.929329	-0.131292	0.995681	0.0728934	0.983367	0.03003	0.993307		8.04827	7.92039	8.53041	8.03022	8.13847	8.33162	8.01947	8.176	8.18436	8.02025	8.16636	8.70331	8.24843	7.638	8.18728
Fez2	ENSMUSG00000056121	ENSMUSG00000056121	0.25497	0.860904	0.210704	0.995114	0.294706	0.814814	0.210923	0.9781		7.86408	7.77103	8.70756	7.87088	8.04673	8.03655	8.17146	7.83721	7.64996	8.13002	7.92307	7.89428	8.17641	7.78569	7.83111
Ebp	ENSMUSG00000031168	ENSMUSG00000031168	-0.253935	0.812248	-0.331935	0.824104	-0.35017	0.60963	-0.27843	0.937456		8.37635	8.21201	8.13304	8.55199	8.41103	8.57647	8.58397	8.64021	8.53322	8.29337	8.25676	9.01331	8.29905	8.58363	8.57436
Tapbp	ENSMUSG00000024308	ENSMUSG00000024308	-0.0222058	0.994628	0.0175375	0.995681	-0.188517	0.891781	-0.0242754	0.993307		9.34027	9.12569	8.63429	9.15025	8.99953	9.08609	8.91036	9.25831	9.50269	8.84611	9.13261	9.11958	8.69582	9.25051	9.22502
Polr2f	ENSMUSG00000033020	ENSMUSG00000033020	-0.333859	0.595449	-0.283684	0.82826	-0.093265	0.951816	-0.181363	0.967914		8.80791	8.86813	8.32222	8.95216	8.79622	8.80987	8.92519	8.61778	8.7452	9.08541	8.7617	9.00463	9.17135	8.99306	8.83555
Ptprf	ENSMUSG00000033295	ENSMUSG00000033295	-0.279952	0.700924	-0.102387	0.995681	-0.197928	0.827969	-0.275468	0.850935		8.4001	8.06288	8.68838	8.7659	8.64018	8.65853	8.73634	8.65498	8.43188	8.57679	8.37044	8.59767	8.64692	8.73339	8.7034
Ndufb11	ENSMUSG00000031059	ENSMUSG00000031059	-0.280399	0.696376	-0.049068	0.995681	-0.253745	0.695749	-0.148503	0.977376		8.61329	8.87221	8.82856	8.75326	9.01474	8.99876	9.07098	9.1991	8.78683	8.96399	8.58454	8.90092	9.15145	9.15248	8.83896
Fbln1	ENSMUSG00000006369	ENSMUSG00000006369	-0.391204	0.505541	-0.209293	0.973324	-0.358714	0.53864	-0.23871	0.95908		8.60309	8.60919	8.45298	8.71988	8.83101	8.82009	9.19361	8.81142	8.66931	8.89216	8.48707	8.86782	8.73979	9.24123	8.78696
Yipf5	ENSMUSG00000024487	ENSMUSG00000024487	0.00367687	0.998731	-0.135336	0.995681	0.00845453	0.996156	-0.093304	0.990293		8.843	8.75776	8.47273	8.80317	8.86163	8.68861	8.62087	8.42023	8.96365	8.58383	8.74929	9.09731	8.71289	8.82006	8.52018
Crip1	ENSMUSG00000006360	ENSMUSG00000006360	-0.379919	0.671206	0.0563476	0.995681	-0.333573	0.69212	-0.394451	0.768896		8.04073	8.35884	8.37416	8.80806	8.5428	8.60828	8.83699	8.20136	8.68407	7.99937	8.31682	8.30088	8.79535	8.15024	8.88586
Anapc5	ENSMUSG00000029472	ENSMUSG00000029472	-0.125567	0.931066	0.0670841	0.995681	-0.0794008	0.968258	0.0388881	0.993165		9.66348	9.53128	9.00364	9.35148	9.25403	9.52788	9.39875	9.58173	9.51306	9.41017	9.43903	9.20347	9.15396	9.81209	9.59527
Emc3	ENSMUSG00000030286	ENSMUSG00000030286	0.0937865	0.951761	0.175653	0.993883	0.171469	0.871275	0.225503	0.95908		8.95951	8.56953	8.83075	8.54614	8.61644	8.55622	8.71943	8.51229	8.63931	8.63889	8.26113	8.89154	8.58892	8.90181	8.59467
Bdnf	ENSMUSG00000048482	ENSMUSG00000048482	-0.0431691	0.990999	-0.145338	0.995681	-0.134219	0.93541	-0.0175088	0.993307		8.44648	8.39332	8.70994	8.73023	8.46519	8.41494	8.56895	8.44167	8.92998	8.74308	8.77705	8.48367	8.46945	8.31846	8.87262
Eif4ebp2	ENSMUSG00000020091	ENSMUSG00000020091	-0.320996	0.595449	-0.0905189	0.995681	-0.274437	0.653163	-0.328766	0.746342		8.40598	8.59938	8.53041	8.90951	8.81024	8.79612	9.10001	8.69481	8.49605	8.53386	8.4908	8.76882	8.71967	8.88404	8.88915
Ssr3	ENSMUSG00000027828	ENSMUSG00000027828	0.26982	0.791414	-0.0428541	0.995681	0.150023	0.916966	-0.0679348	0.992218		8.37034	8.49739	8.6787	8.53141	8.58417	8.66233	8.45096	8.55226	8.08772	8.45551	8.66927	8.57147	8.64336	7.89028	8.13831
Rela	ENSMUSG00000024927	ENSMUSG00000024927	-0.131046	0.91114	0.0753319	0.995681	-0.0199681	0.989047	0.137913	0.980674		8.41767	8.78831	8.81757	8.58944	8.54699	8.52322	8.84948	8.75086	8.50855	8.61848	8.48333	8.7325	8.5815	9.04729	8.794
Map1b	ENSMUSG00000052727	ENSMUSG00000052727	0.100944	0.903543	0.0784972	0.995681	0.195844	0.675287	0.232264	0.746342		9.10394	9.13591	9.0017	8.88191	8.76777	8.88647	8.82123	8.87269	8.95454	9.00648	8.89433	9.08913	8.90933	9.03928	8.9815
Cnpy2	ENSMUSG00000025381	ENSMUSG00000025381	-0.227871	0.753981	-0.170928	0.983609	-0.00180996	0.999106	-0.168671	0.967914		8.46349	8.53391	8.6141	8.66155	8.64018	8.82009	8.48738	8.51229	8.6279	8.60472	8.55278	8.93785	8.92113	8.81068	8.54126
Arih1	ENSMUSG00000025234	ENSMUSG00000025234	0.121743	0.956186	0.0847919	0.995681	0.107539	0.964742	-0.443299	0.766588		7.7205	7.68084	8.4643	8.44288	8.53859	8.37388	8.15142	7.79117	7.75159	7.86149	7.95582	7.97644	8.26241	7.38356	7.91102
Ank	ENSMUSG00000022265	ENSMUSG00000022265	0.248269	0.804828	0.175772	0.993883	0.0732638	0.968258	0.146171	0.982494		8.65832	8.37043	8.92594	8.37851	8.51311	8.69233	8.55376	8.62904	8.6279	8.58383	8.57754	8.33588	8.6073	8.04222	8.57844
Acin1	ENSMUSG00000022185	ENSMUSG00000022185	-0.143189	0.894787	-0.00929902	0.995681	-0.0917824	0.94507	0.074564	0.990293		9.66103	9.4186	9.10836	9.29505	9.29698	9.40646	9.34021	9.53661	9.6071	9.5224	9.42545	9.29526	9.30344	9.73653	9.57701
Ube2z	ENSMUSG00000014349	ENSMUSG00000014349	-0.000887213	0.999155	0.0638455	0.995681	-0.0528071	0.98263	-0.0910218	0.990293		8.19809	8.49739	8.79757	8.66426	8.62836	8.56435	8.53455	8.5562	8.65439	8.3848	8.46828	8.5418	8.72304	8.37892	8.46829
Ube3a	ENSMUSG00000025326	ENSMUSG00000025326	0.151671	0.83935	0.089299	0.995681	0.181242	0.766013	-0.0340275	0.992218		8.83431	8.86813	8.97425	8.80562	8.91449	9.06904	8.78592	8.69481	8.66931	8.81058	8.80428	8.81173	8.8794	8.60909	8.74033
Ndufb7	ENSMUSG00000033938	ENSMUSG00000033938	-0.223754	0.765957	-0.0944205	0.995681	-0.275019	0.611938	0.108884	0.98912		8.74436	8.61408	8.71469	8.62039	8.54699	8.58449	8.89839	9.01395	8.98169	8.79551	8.64269	8.90559	8.5963	9.17944	8.90875
Tshz1	ENSMUSG00000046982	ENSMUSG00000046982	0.462228	0.445651	0.204468	0.993883	0.380425	0.588634	0.499454	0.519603		7.86408	7.86413	8.67139	7.70228	7.81611	7.61127	7.89244	7.76419	7.8267	7.96207	8.03969	8.00281	7.74329	7.72709	7.77527
Tnfaip1	ENSMUSG00000017615	ENSMUSG00000017615	-0.174342	0.812248	0.056253	0.995681	-0.116892	0.907779	0.115131	0.980471		9.06731	9.09459	9.00558	8.90951	8.97174	8.94059	9.17884	9.16599	9.16654	9.0221	8.93597	9.03477	8.92699	9.41629	9.29619
Bola2	ENSMUSG00000047721	ENSMUSG00000047721	-0.239111	0.830667	-0.113899	0.995681	-0.118362	0.944146	-0.0791684	0.990293		8.14283	8.48678	8.50598	8.70683	8.43384	8.21764	8.6604	8.63278	8.18436	8.54471	8.35825	8.59767	8.89743	8.54645	8.39144
Steap1	ENSMUSG00000015652	ENSMUSG00000015652	-0.27438	0.751635	-0.223432	0.949477	-0.188874	0.857243	0.0810105	0.990293		8.09995	8.21201	8.58069	8.17371	8.0408	8.48088	8.49137	8.53641	8.50023	8.50822	8.30839	8.77138	8.53234	8.76286	8.46829
Ephb3	ENSMUSG00000005958	ENSMUSG00000005958	-0.628525	0.839079	-0.246235	0.995681	-0.433629	0.915628	-0.0147799	0.997635		8.26431	7.61418	6.5817	7.37279	7.7376	7.80905	7.67108	8.02507	8.40094	7.3285	7.57511	8.46798	7.28565	8.86	8.20852
Uqcr11	ENSMUSG00000020163	ENSMUSG00000020163	-0.342447	0.269955	-0.115968	0.995681	-0.289884	0.408615	-0.211946	0.880696		8.97145	8.96302	8.72178	9.09923	9.04766	9.13059	9.3291	9.06182	9.10477	9.02727	8.87734	9.07883	9.3057	9.19634	9.16109
Igsf8	ENSMUSG00000038034	ENSMUSG00000038034	-0.252552	0.752515	-0.0579165	0.995681	-0.324943	0.549007	-0.167428	0.967914		8.91897	8.95149	8.67139	9.00855	9.1254	8.89939	9.03041	8.98795	9.4475	8.62532	8.99494	9.05592	8.95596	9.12248	9.20667
Rnh1	ENSMUSG00000038650	ENSMUSG00000038650	0.330415	0.326593	0.250047	0.72441	0.388173	0.140775	0.37506	0.30996		8.90658	9.02298	9.01523	8.51053	8.6244	8.70342	8.48738	8.6365	8.66931	8.80156	8.74929	8.657	8.82705	8.5946	8.52865
Copb2	ENSMUSG00000032458	ENSMUSG00000032458	-0.139046	0.902328	-0.271699	0.826876	-0.21293	0.790135	-0.204003	0.964166		8.01788	8.39332	8.50323	8.68304	8.43384	8.45048	8.49535	8.60643	8.51269	8.46697	8.5203	8.77903	8.57405	8.42881	8.38679
Arpp19	ENSMUSG00000007656	ENSMUSG00000007656	0.0113727	0.995821	0.0176068	0.995681	-0.0901187	0.939283	0.238204	0.78039		9.20855	9.10503	9.0017	8.8585	8.97174	8.7647	9.19606	9.11884	9.26066	9.16962	8.9711	9.1095	8.94155	9.26431	9.05076
Eid1	ENSMUSG00000091337	ENSMUSG00000091337	0.0178278	0.995456	-0.0283919	0.995681	-0.0788457	0.968258	-0.011737	0.995331		9.15719	9.35586	8.8503	9.16559	9.14765	9.11407	8.99712	9.00822	9.55182	9.05537	9.33912	9.06638	9.09788	8.87207	9.33534
Cyb5a	ENSMUSG00000024646	ENSMUSG00000024646	-0.0421353	0.991488	-0.263843	0.993883	-0.176419	0.937415	-0.141024	0.990293		7.8295	7.76226	8.4839	8.36528	8.19299	8.05975	8.17642	7.96117	8.5454	8.25424	8.37449	8.37006	8.27166	7.44141	8.45058
Anxa6	ENSMUSG00000018340	ENSMUSG00000018340	-0.0754392	0.981805	0.114977	0.995681	-0.290928	0.840213	0.139369	0.990293		9.55125	9.1154	8.22575	8.82507	8.86499	9.05468	9.06027	9.34735	9.58169	8.64226	9.16097	8.97607	8.69582	9.20352	9.40599
Gns	ENSMUSG00000034707	ENSMUSG00000034707	-0.220545	0.751635	-0.106965	0.995681	-0.228458	0.69212	-0.169142	0.967914		9.16068	8.87628	8.7659	9.1713	8.88499	9.23364	9.22989	9.15044	9.11025	9.00648	9.12062	9.00246	8.99277	9.28252	9.18003
Eif1ax	ENSMUSG00000067194	ENSMUSG00000067194	0.0102757	0.995885	-0.00697744	0.995681	-0.0716806	0.956453	-0.0486422	0.992218		9.2286	9.52092	9.11915	9.25616	9.44357	9.32742	9.31115	9.5564	9.208	9.35368	9.30986	9.24089	9.2944	9.27572	9.28374
Ddx39b	ENSMUSG00000019432	ENSMUSG00000019432	0.226484	0.713349	0.148681	0.98619	0.0974655	0.933068	0.121984	0.977376		9.59823	9.58696	9.23933	9.29679	9.47251	9.29602	9.2838	9.29411	9.5498	9.34543	9.32665	9.3182	9.17382	9.35526	9.22241
Nktr	ENSMUSG00000032525	ENSMUSG00000032525	-0.0317818	0.991488	-0.116164	0.995681	-0.0786493	0.968258	0.0528173	0.992218		9.29663	9.20549	8.68597	9.08719	8.91124	9.07759	8.9515	9.09468	9.39462	9.11726	9.39989	9.0475	8.7095	9.27799	9.27873
Ppp4r3b	ENSMUSG00000020463	ENSMUSG00000020463	0.035865	0.991488	0.133131	0.995681	0.233845	0.809235	0.0787144	0.990293		8.61837	8.85582	8.8503	8.61481	8.76777	8.72534	8.85259	8.53641	8.17915	8.83141	8.56344	8.53579	9.02866	8.58363	8.57436
Crim1	ENSMUSG00000024074	ENSMUSG00000024074	-0.0513648	0.97252	-0.101247	0.995681	-0.110966	0.916966	-0.0315552	0.992676		8.54567	8.5895	8.82198	8.80071	8.66739	8.60828	8.763	8.67684	8.87955	8.7081	8.93323	8.6431	8.75636	8.61987	8.7692
Cxcl1	ENSMUSG00000029380	ENSMUSG00000029380	1.9108	0.437606	0.97144	0.97081	1.63219	0.550198	1.37217	0.875677		5.6696	5.26359	8.22575	6.06665	5.9928	4.77661	5.85	5.12013	5.38178	5.90629	5.78359	6.49143	5.50659	3.88122	5.71794
Srrt	ENSMUSG00000037364	ENSMUSG00000037364	-0.15028	0.860904	-0.0750028	0.995681	-0.137071	0.872136	-0.0496937	0.992218		9.2871	9.23113	8.90116	9.25257	9.14489	9.1711	9.16141	9.3175	9.34902	9.30557	9.20478	9.13556	9.26923	9.45091	9.1336
Pgp	ENSMUSG00000043445	ENSMUSG00000043445	-0.0637912	0.963973	0.0157661	0.995681	-0.0513546	0.980748	-0.00244696	0.998729		8.89827	8.56953	8.9341	8.69101	8.77136	8.9776	8.9486	8.83105	8.81058	8.78334	8.78922	8.82164	9.08744	8.80754	8.70713
Snrnp70	ENSMUSG00000063511	ENSMUSG00000063511	0.342246	0.713349	0.474008	0.53935	0.261152	0.799092	0.274367	0.957909		8.51336	8.39332	8.81315	8.23681	8.31106	8.40592	8.58023	8.12389	8.25033	8.24982	8.04477	8.06255	8.53234	7.72043	8.38212
Pitpna	ENSMUSG00000017781	ENSMUSG00000017781	-0.0952893	0.951761	0.0191025	0.995681	-0.0518641	0.985028	0.126336	0.98912		8.23158	8.44355	8.78634	8.42068	8.25066	8.48944	8.61357	8.70903	8.35554	8.48586	8.44155	8.55967	8.72304	8.35762	8.72198
Aimp1	ENSMUSG00000028029	ENSMUSG00000028029	0.0948277	0.928584	0.0372329	0.995681	0.212236	0.695749	0.160274	0.966979		8.83866	8.93598	8.96431	8.67234	8.72402	8.87344	8.76958	8.72311	8.62025	8.98805	8.85146	8.79421	8.63264	8.99582	8.81493
Gm9276	ENSMUSG00000118377	ENSMUSG00000118377	-0.405502	0.792798	-0.152211	0.995681	-0.391854	0.782161	-0.0121354	0.996997		7.52907	7.96693	8.33152	8.00912	7.85043	8.12169	8.92519	8.43741	7.33145	8.38076	8.06493	7.92679	8.35231	8.44101	8.36331
Tra2a	ENSMUSG00000029817	ENSMUSG00000029817	0.112969	0.923226	0.054649	0.995681	0.179936	0.831788	0.0634802	0.990293		8.79004	8.66201	8.80204	8.77093	8.67507	8.62004	8.49932	8.34028	8.84383	8.68866	8.6122	8.7917	8.68548	8.45312	8.77277
Dynlt3	ENSMUSG00000031176	ENSMUSG00000031176	-0.173449	0.83728	0.00730288	0.995681	-0.103406	0.935999	0.0770374	0.990293		9.12191	8.92424	8.83294	8.97411	8.81024	8.85698	8.96591	9.11351	9.10477	8.79854	9.01838	9.02837	8.90339	9.33796	9.12245
Ndufa10	ENSMUSG00000026260	ENSMUSG00000026260	0.184966	0.829089	0.078122	0.995681	0.13575	0.896202	0.119916	0.982436		8.81676	8.90843	8.87807	8.80317	8.70913	8.73258	8.67451	8.79485	8.73105	8.90344	8.74618	8.71931	8.61821	8.97078	8.4053
Cnpy3	ENSMUSG00000023973	ENSMUSG00000023973	0.138754	0.903694	-0.0363851	0.995681	0.0923722	0.946286	0.0510938	0.992218		9.35857	9.4517	8.94019	9.18077	9.19115	9.25641	8.99712	9.21413	9.28023	9.34336	9.3979	9.13755	8.95596	9.3681	9.00597
Parva	ENSMUSG00000030770	ENSMUSG00000030770	-0.0673795	0.963927	-0.179229	0.97157	-0.145924	0.888637	-0.00170645	0.998729		8.69239	8.7175	8.58847	8.65613	8.76418	8.57244	8.66394	8.79485	8.95454	8.71132	8.68237	9.08913	8.53234	8.87806	8.76204
Dusp1	ENSMUSG00000024190	ENSMUSG00000024190	1.12427	0.0125316	0.848794	0.202033	0.815412	0.155023	0.800647	0.328981		8.14283	7.75344	8.48111	7.54692	7.55819	6.93206	7.18149	7.26481	7.60411	6.97971	7.27982	7.64356	7.29475	6.32416	7.35715
Hmgb1	ENSMUSG00000066551	ENSMUSG00000066551	-0.156316	0.92372	-0.0741832	0.995681	-0.175902	0.915628	0.143708	0.98912		9.35857	9.36458	8.51144	8.90495	9.01171	9.02257	8.99712	9.18136	9.63776	9.27114	9.18189	9.13357	9.04763	9.52731	9.21718
Anp32e	ENSMUSG00000015749	ENSMUSG00000015749	0.217953	0.865796	0.104779	0.995681	0.0836024	0.968258	0.00901259	0.996997		8.24476	8.427	8.67139	8.5432	8.54699	8.25329	8.49932	8.48776	8.12607	8.56262	8.19408	8.30088	8.60364	7.81099	8.22424
Racgap1	ENSMUSG00000023015	ENSMUSG00000023015	-0.000974574	0.999155	0.0391645	0.995681	0.107963	0.937415	0.0707214	0.990293		9.15021	9.31447	8.91978	9.06487	9.0565	9.06332	8.96591	9.12945	8.9727	9.11969	9.08652	9.07262	9.41405	9.08148	8.84236
Uck2	ENSMUSG00000026558	ENSMUSG00000026558	0.028433	0.991488	0.165532	0.950576	0.0152744	0.989147	0.0760188	0.990293		8.74436	8.83506	8.92184	8.82507	8.79622	8.66233	8.72622	8.84721	8.8955	8.79854	8.46069	8.74297	8.92113	8.73999	8.76562
Serpinf1	ENSMUSG00000000753	ENSMUSG00000000753	-0.303833	0.714279	-0.381741	0.641646	-0.377639	0.503574	-0.34295	0.768896		8.15684	7.89654	8.35907	8.51952	8.50882	8.45923	8.54611	8.49598	8.54944	8.40081	8.31682	8.82657	8.44104	8.16504	8.71828
Ptges	ENSMUSG00000050737	ENSMUSG00000050737	0.041838	0.991488	-0.0662538	0.995681	0.0667915	0.984334	0.143407	0.98912		7.98683	7.80558	8.65913	8.18128	8.03484	7.98901	8.24421	8.21138	7.97216	8.47077	8.20774	8.13986	8.07443	8.0207	8.39608
Trir	ENSMUSG00000041203	ENSMUSG00000041203	0.183111	0.86569	0.0951856	0.995681	0.00667705	0.996577	0.141321	0.982436		9.76989	9.64536	9.22442	9.35148	9.45477	9.45101	9.31791	9.50436	9.79736	9.46832	9.69325	9.19397	9.28301	9.42861	9.41744
Mapkapk2	ENSMUSG00000016528	ENSMUSG00000016528	-0.105089	0.913731	-0.0024545	0.997449	-0.0204452	0.988899	-0.196877	0.925538		9.02973	9.01193	8.85245	9.13863	9.17228	9.16309	9.06831	9.04791	8.81729	8.97741	8.99756	8.9195	9.27384	8.97078	8.92809
Arf1	ENSMUSG00000048076	ENSMUSG00000048076	0.0111045	0.995885	-0.0303052	0.995681	-0.0685315	0.965614	-0.195923	0.96378		8.52421	8.39899	8.79085	8.67502	8.87169	8.80301	8.68151	8.66595	8.62408	8.55549	8.62583	8.67352	8.80493	8.34901	8.54544
Capn2	ENSMUSG00000026509	ENSMUSG00000026509	0.156912	0.860101	0.228661	0.845975	0.267047	0.585608	0.393966	0.342372		9.11115	9.17937	9.02099	8.70945	8.67889	8.74694	8.7397	8.98211	8.77998	8.99598	8.85146	8.77394	8.8703	9.1867	8.74397
Tars	ENSMUSG00000022241	ENSMUSG00000022241	0.121517	0.894787	0.0290215	0.995681	0.153241	0.833162	0.110475	0.980674		8.799	8.85169	8.94222	8.73281	8.8447	8.69973	8.48338	8.85042	8.79366	8.90344	8.84565	8.77138	8.76293	8.70668	8.77633
Prkar2a	ENSMUSG00000032601	ENSMUSG00000032601	0.00514419	0.995885	0.0735365	0.995681	0.0753387	0.956453	0.0462853	0.992218		9.05987	9.11884	9.02099	9.07099	9.05061	8.93119	8.87108	9.12945	8.96062	9.16024	9.0791	8.70599	8.98997	9.14503	9.04191
Prrx1	ENSMUSG00000026586	ENSMUSG00000026586	-0.289383	0.547893	-0.346109	0.42177	-0.284401	0.502232	-0.245996	0.79543		8.58248	8.51837	8.61918	8.86556	8.83445	8.75407	8.83385	8.6623	9.05168	8.98805	8.94958	8.81669	8.84265	8.74328	8.99379
Mphosph6	ENSMUSG00000031843	ENSMUSG00000031843	0.0841451	0.963295	-0.0243899	0.995681	0.111655	0.944146	-0.00210834	0.998729		8.66814	9.13251	8.61664	8.92762	8.78562	8.74694	8.50722	8.9585	8.6279	8.98007	8.78618	8.76112	8.85192	8.95384	8.32978
Nasp	ENSMUSG00000028693	ENSMUSG00000028693	-0.209691	0.830667	-0.332914	0.68434	-0.219885	0.796821	0.0317706	0.993307		8.77194	8.37618	8.44157	8.51353	8.46961	8.53154	8.49932	8.75772	8.96969	8.73046	8.89433	8.96269	8.4973	8.93958	8.76204
Larp7	ENSMUSG00000027968	ENSMUSG00000027968	-0.0903628	0.962693	-0.419359	0.609845	-0.110431	0.950891	0.0705806	0.992218		8.52421	8.06288	8.30658	8.33507	8.25579	8.11617	8.33583	8.16572	8.70232	8.66565	8.79827	8.70599	7.92422	8.63057	8.54544
Etfb	ENSMUSG00000004610	ENSMUSG00000004610	-0.16677	0.879839	0.170711	0.993883	-0.0351949	0.988899	0.210271	0.966979		9.08207	9.32642	8.83947	8.8514	8.8481	8.94683	9.21065	9.25104	8.88914	9.04011	8.79526	8.9195	9.33024	9.44889	8.94083
Cyba	ENSMUSG00000006519	ENSMUSG00000006519	-0.264707	0.632143	-0.200706	0.904197	-0.14086	0.868184	-0.194978	0.944108		8.6972	8.80975	8.565	8.85377	8.83101	8.95922	8.88328	8.74052	8.85693	8.75247	8.80128	9.0809	8.93575	9.07888	8.82528
Man1a2	ENSMUSG00000008763	ENSMUSG00000008763	-0.0355775	0.990166	-0.109713	0.995681	-0.0930335	0.944146	-0.0481549	0.992218		8.97936	8.76216	8.74285	8.92311	8.72771	8.96537	8.80849	8.9585	8.99063	9.03499	8.84565	8.92641	8.68548	9.13755	8.72198
Ndufv2	ENSMUSG00000024099	ENSMUSG00000024099	-0.248809	0.804828	-0.154768	0.995681	-0.0771038	0.968258	-0.0895584	0.990293		7.99466	8.39332	8.60901	8.51653	8.38784	8.44609	8.6099	8.54039	8.12066	8.53749	8.47206	8.53879	8.855	8.42472	8.51166
Pbrm1	ENSMUSG00000042323	ENSMUSG00000042323	0.0556959	0.970806	-0.0358171	0.995681	0.00261697	0.999106	-0.16544	0.967914		8.36432	8.59938	8.6542	8.8585	8.72402	8.53154	8.56895	8.34484	8.70594	8.65233	8.58802	8.51456	8.5963	8.39992	8.48144
Csnk2a2	ENSMUSG00000046707	ENSMUSG00000046707	0.0941988	0.943027	0.0812985	0.995681	0.115231	0.922007	0.102833	0.98912		8.65339	8.62379	8.80204	8.68304	8.6244	8.47226	8.76958	8.57573	8.38295	8.64562	8.60189	8.60916	8.82705	8.54268	8.41447
Reep5	ENSMUSG00000005873	ENSMUSG00000005873	0.240551	0.797614	0.134869	0.995681	0.123805	0.935918	0.221165	0.964166		9.42666	9.28417	8.94222	9.01914	8.94974	9.0489	8.75306	9.17626	9.32331	8.96399	9.18419	9.11958	8.81445	9.20829	8.90875
Cdk6	ENSMUSG00000040274	ENSMUSG00000040274	0.261373	0.814175	0.171745	0.995681	0.238045	0.831321	0.243928	0.966979		8.61329	8.96302	8.81094	8.51053	8.47841	8.68861	8.80529	8.54039	8.31342	8.81656	8.69212	8.35648	8.93575	8.38315	8.20852
Sec11a	ENSMUSG00000025724	ENSMUSG00000025724	0.0277898	0.993088	-0.0429118	0.995681	0.0104537	0.995754	0.0411487	0.993307		7.80301	8.19256	8.63679	8.26557	8.20895	8.19162	8.49137	8.11857	8.11522	8.39683	8.17566	8.33588	8.49336	7.99333	8.17654
Tnk2	ENSMUSG00000022791	ENSMUSG00000022791	-0.116188	0.91243	-0.121537	0.995681	-0.0958133	0.93969	-0.251529	0.821251		8.86023	9.03759	8.81315	9.10122	9.22816	9.13059	8.94278	9.09197	8.95759	9.17196	9.11096	8.76369	9.19098	8.97358	8.87262
Cops4	ENSMUSG00000035297	ENSMUSG00000035297	-0.105049	0.926955	-0.0284087	0.995681	-0.029162	0.988899	-0.191716	0.95908		8.78553	8.80975	8.75212	8.98063	8.95606	8.9776	8.82755	8.90393	8.6914	8.97205	8.73364	8.71133	9.1414	8.83555	8.63052
Igf1r	ENSMUSG00000005533	ENSMUSG00000005533	-0.118909	0.894787	-0.123255	0.993883	-0.126345	0.870977	-0.114227	0.9781		8.97936	9.25321	8.88861	9.11314	9.20448	9.15234	9.1714	9.10547	9.22577	9.09774	9.21834	9.17669	9.27843	9.07627	9.11965
Il6st	ENSMUSG00000021756	ENSMUSG00000021756	0.0292324	0.991488	-0.156986	0.974416	-0.0782281	0.946286	-0.123799	0.9781		8.59797	8.44355	8.6932	8.69894	8.75696	8.67365	8.69541	8.64392	8.65439	8.68212	8.70181	8.83638	8.32592	8.68289	8.64227
Cdc5l	ENSMUSG00000023932	ENSMUSG00000023932	-0.323341	0.701878	-0.284371	0.887987	-0.0637418	0.981162	0.124953	0.98912		7.8726	7.89654	8.46993	8.12745	8.02886	7.81587	8.39241	8.03074	8.10428	8.22754	8.41823	8.5418	8.46139	8.32287	8.53286
Cs	ENSMUSG00000005683	ENSMUSG00000005683	0.12196	0.943939	0.138962	0.995681	0.0309061	0.988899	-0.122175	0.990293		7.91444	8.15286	8.6039	8.48018	8.35475	8.31243	8.30442	8.22134	8.17393	8.01506	8.10928	8.24672	8.43282	7.78569	8.14383
Degs1	ENSMUSG00000038633	ENSMUSG00000038633	0.0875854	0.940091	0.0716453	0.995681	-0.0343949	0.986683	0.0308018	0.992463		8.86451	8.71295	8.92389	8.87493	8.80325	8.74337	8.90139	8.8343	8.88595	8.90906	8.74929	8.6403	8.67158	8.61987	8.95032
Rtcb	ENSMUSG00000001783	ENSMUSG00000001783	-0.0631261	0.961849	-0.0708383	0.995681	0.136813	0.870447	0.0745464	0.990293		8.91072	8.96684	8.91567	8.66155	9.05356	8.84033	8.79241	8.92844	8.65064	9.08045	8.94143	8.97829	9.01771	9.0658	8.88915
Rbpj	ENSMUSG00000039191	ENSMUSG00000039191	0.109349	0.930063	0.168441	0.993883	0.090155	0.949308	0.256554	0.884634		8.83866	8.83087	8.91978	8.56651	8.66739	8.60039	9.03589	8.77809	8.45359	8.79854	8.74618	8.5418	8.83331	8.87806	8.53286
Fam104a	ENSMUSG00000041629	ENSMUSG00000041629	-0.152766	0.842331	-0.145145	0.98619	-0.140881	0.84798	-0.0198801	0.993307		8.89409	8.93598	8.91978	8.89578	8.99033	8.92488	9.06027	9.11618	8.99063	9.18358	9.15863	8.81917	9.14895	9.09699	8.95032
Psma3	ENSMUSG00000060073	ENSMUSG00000060073	-0.126913	0.95249	-0.118821	0.995681	-0.0858775	0.977849	-0.12448	0.990293		7.88948	7.56461	8.47553	8.30074	8.03484	8.13267	8.49137	7.84367	7.94789	8.00985	8.157	8.28663	8.40368	7.83585	8.19793
Kpnb1	ENSMUSG00000001440	ENSMUSG00000001440	0.165646	0.860904	0.0461336	0.995681	0.238346	0.695749	0.089636	0.990293		8.60309	8.64779	8.82418	8.65613	8.67889	8.48944	8.41359	8.56404	8.40985	8.74934	8.82806	8.34965	8.50516	8.51215	8.59063
Sertad2	ENSMUSG00000049800	ENSMUSG00000049800	0.102632	0.932238	0.0215525	0.995681	0.0294229	0.988899	0.0810766	0.990293		8.42926	8.32351	8.75212	8.46785	8.43836	8.42391	8.54611	8.49187	8.44495	8.52293	8.36232	8.60916	8.22005	8.5389	8.49014
Gnaq	ENSMUSG00000024639	ENSMUSG00000024639	0.157154	0.879839	0.137529	0.995681	0.0794759	0.956453	0.26776	0.844349		8.52961	8.44355	8.78183	8.26557	8.30612	8.43282	8.40092	8.59882	8.55748	8.38076	8.27418	8.69525	8.33477	8.4691	8.52442
Ndufa4	ENSMUSG00000029632	ENSMUSG00000029632	-0.201552	0.908642	0.0207122	0.995681	-0.0442049	0.988899	-0.126356	0.990293		7.51825	7.67151	8.54115	8.04274	8.07022	8.25329	8.06302	8.05877	8.00781	7.94032	7.74713	8.20946	8.4894	7.77287	8.24495
Pum3	ENSMUSG00000041360	ENSMUSG00000041360	-0.0392494	0.991157	-0.118434	0.995681	-0.0476572	0.985433	0.259618	0.943986		8.81676	8.78831	8.77956	8.47094	8.42476	8.70342	8.86495	8.73358	8.92066	9.20197	9.01321	8.41658	8.61458	8.87806	8.98458
Atf5	ENSMUSG00000038539	ENSMUSG00000038539	0.46225	0.569019	0.53586	0.501378	0.467045	0.486176	0.485791	0.683954		9.96171	10.1257	9.01523	9.24176	9.3069	9.31783	9.04948	9.47762	9.36285	9.33088	9.32665	9.04327	9.28758	9.55565	9.04782
Mcu	ENSMUSG00000009647	ENSMUSG00000009647	0.233029	0.72561	0.0177949	0.995681	0.367704	0.307246	-0.066369	0.990293		8.40598	8.49739	8.63679	8.60641	8.58825	8.5684	8.00279	8.34028	8.11522	8.55906	8.53482	8.41985	8.39101	8.38315	8.07612
Dync1li2	ENSMUSG00000035770	ENSMUSG00000035770	0.0544344	0.970806	0.243228	0.830597	0.101836	0.939283	0.169092	0.967914		9.11115	9.14606	8.97425	8.98496	8.90146	8.83025	8.97734	9.06182	8.87955	8.90906	8.90555	8.68171	8.91524	9.29826	8.80101
Emc1	ENSMUSG00000078517	ENSMUSG00000078517	-0.445817	0.483132	-0.300342	0.888255	-0.448861	0.412774	-0.145965	0.98912		8.4001	8.59938	8.12593	8.36195	8.36903	8.80644	8.91334	8.81142	8.74871	8.72092	8.39454	8.87735	8.47746	9.15248	8.75844
Sri	ENSMUSG00000003161	ENSMUSG00000003161	0.187496	0.830667	0.143349	0.993883	0.220432	0.734806	-0.068298	0.990293		8.38232	8.48145	8.73819	8.56362	8.6004	8.69233	8.263	8.47533	8.25033	8.33565	8.40248	8.48367	8.55145	8.26911	8.25519
Manf	ENSMUSG00000032575	ENSMUSG00000032575	0.0549175	0.991488	0.0221617	0.995681	0.0632786	0.988797	-0.276432	0.967914		7.80301	7.88851	8.34077	8.43024	8.16599	8.31725	8.06837	7.81766	8.02531	7.90706	8.06493	8.06672	8.52463	6.9318	8.07033
Mrpl54	ENSMUSG00000034932	ENSMUSG00000034932	-0.380344	0.543111	-0.0856332	0.995681	-0.312006	0.639706	0.11501	0.98946		8.25782	8.15286	8.60901	8.00486	8.41103	8.31243	8.83699	8.64021	8.51682	8.27176	8.47582	8.57441	8.46542	8.87806	8.83896
Huwe1	ENSMUSG00000025261	ENSMUSG00000025261	0.0830558	0.956106	0.100453	0.995681	0.10429	0.93969	0.198932	0.966979		9.72356	9.80544	9.20937	9.38135	9.35311	9.45976	9.30889	9.57204	9.58169	9.69633	9.43709	9.33387	9.47935	9.62148	9.43331
Vps35	ENSMUSG00000031696	ENSMUSG00000031696	0.0695363	0.960782	0.030595	0.995681	0.0746196	0.956453	0.210552	0.933043		8.65339	8.58453	8.89281	8.43341	8.55117	8.56435	8.65329	8.70903	8.58528	8.64562	8.80728	8.6234	8.55524	8.5275	8.8626
Plk1	ENSMUSG00000030867	ENSMUSG00000030867	-0.085491	0.968949	0.131871	0.995681	0.170609	0.92593	-0.173205	0.98795		8.37635	8.53391	8.50871	8.52844	8.6519	8.75407	8.35348	8.66959	7.75159	8.44397	8.12856	8.43929	8.98436	8.29624	8.28048
Fads1	ENSMUSG00000010663	ENSMUSG00000010663	-0.180349	0.862728	-0.133708	0.995681	-0.196039	0.831321	-0.14013	0.980674		8.35219	8.27502	8.57287	8.58944	8.43836	8.61613	8.58771	8.595	8.63552	8.56618	8.19865	8.79924	8.47346	8.5389	8.7476
Cdk4	ENSMUSG00000006728	ENSMUSG00000006728	0.0569876	0.968949	0.0219781	0.995681	0.0805831	0.955089	-0.245895	0.871033		8.57206	8.814	8.75212	8.87959	8.93383	9.06904	8.58771	8.76113	8.55748	8.67556	8.93049	8.44892	8.69238	8.7201	8.56616
Smg7	ENSMUSG00000042772	ENSMUSG00000042772	0.373155	0.612343	0.244461	0.938299	0.362132	0.57192	0.313047	0.875677		9.3945	9.34416	8.9136	8.96318	9.01474	8.76117	8.66747	8.8884	9.02872	9.01431	9.24509	8.6375	8.71289	9.13003	8.68457
Inf2	ENSMUSG00000037679	ENSMUSG00000037679	-0.263038	0.632143	-0.29287	0.604898	-0.275171	0.522317	-0.151516	0.967914		8.42926	8.32351	8.64179	8.62039	8.60844	8.66233	8.89839	8.63278	8.71316	8.88363	8.66927	8.75078	8.68894	8.75636	8.77633
Larp1	ENSMUSG00000037331	ENSMUSG00000037331	0.0950155	0.929012	-0.131603	0.993883	0.113097	0.915628	0.0767277	0.990293		8.82117	8.77093	8.77275	8.65341	8.6004	8.87016	8.59143	8.72311	8.70956	8.97473	8.97909	8.79673	8.78247	8.79174	8.48144
Ppp6r3	ENSMUSG00000024908	ENSMUSG00000024908	-0.0877121	0.961849	-0.155292	0.995681	-0.119769	0.941735	-0.168327	0.9781		7.98683	8.07001	8.38014	8.60921	8.14954	8.17046	8.40938	8.06431	8.35092	8.15385	8.27418	8.4992	8.03696	8.37469	8.32005
Gm15779	ENSMUSG00000082633	ENSMUSG00000082633	-0.259336	0.832794	-0.0627897	0.995681	0.0978891	0.961738	-0.320926	0.920649		8.04073	8.29947	8.40972	8.4863	8.58417	8.66611	8.39241	8.26529	7.76554	8.50822	8.02433	8.39683	8.85192	8.45312	8.16572
Pmp22	ENSMUSG00000018217	ENSMUSG00000018217	-0.0930823	0.955471	0.00547642	0.995681	-0.31494	0.626903	-0.295997	0.859572		7.8726	8.20556	8.45865	8.637	8.42931	8.42391	8.6604	8.4159	8.47498	8.06114	8.06493	8.44572	8.17148	8.34468	8.38212
Pclaf	ENSMUSG00000040204	ENSMUSG00000040204	0.00567189	0.995885	0.131686	0.993883	0.0682337	0.95768	0.096743	0.98912		9.25489	9.29637	9.03624	9.123	9.1777	8.98973	9.11561	9.11351	9.15333	9.20426	9.03125	8.94919	9.11596	9.4018	9.02105
Ubxn4	ENSMUSG00000026353	ENSMUSG00000026353	0.141836	0.87702	0.147211	0.993883	0.19215	0.774735	0.282264	0.746342		9.17796	8.9858	8.96431	8.73023	8.72402	8.83362	8.7296	8.76794	9.04025	8.87506	8.86302	8.94919	8.73312	9.08148	8.86928
Sema3a	ENSMUSG00000028883	ENSMUSG00000028883	0.0100532	0.995885	-0.0378667	0.995681	0.163586	0.83301	-0.0838168	0.990293		8.58248	8.6043	8.68838	8.72765	8.80325	8.59643	8.33583	8.50416	8.55347	8.69842	8.51664	8.76882	8.64336	8.44909	8.75122
Enpp1	ENSMUSG00000037370	ENSMUSG00000037370	-0.242099	0.838253	-0.32321	0.848859	-0.386919	0.561839	-0.229097	0.967914		8.35827	8.10511	7.97582	8.5432	8.37847	8.17578	8.54227	8.30328	8.72034	8.22305	8.28281	8.81669	8.17148	8.63411	8.32005
Chst1	ENSMUSG00000027221	ENSMUSG00000027221	0.135685	0.894787	0.123377	0.995681	0.0609974	0.968258	0.147131	0.967914		9.4004	9.50524	9.08655	9.14445	9.08273	9.32981	9.16641	9.34735	9.30432	9.18358	9.20251	9.2501	9.03139	9.38083	9.16653
R3hdm4	ENSMUSG00000035781	ENSMUSG00000035781	-0.0661163	0.965879	0.188221	0.97081	-0.0190668	0.989147	-0.199123	0.966979		9.22195	9.25633	8.6787	9.34138	9.32654	9.11129	9.1985	9.07011	8.9787	8.88932	9.0338	8.70063	9.12108	9.15	9.12524
Ilrun	ENSMUSG00000056692	ENSMUSG00000056692	0.220517	0.740404	0.295211	0.641646	0.103334	0.932952	0.28453	0.746342		9.52718	9.59933	9.20431	9.14639	9.21242	9.13606	9.33799	9.42906	9.26312	9.2536	9.13499	9.07054	9.12108	9.45091	9.08274
Ola1	ENSMUSG00000027108	ENSMUSG00000027108	0.0205787	0.992303	-0.028654	0.995681	-0.00260689	0.999106	-0.00118098	0.998797		9.11833	9.15613	8.95832	9.03802	8.98724	9.2001	9.20823	9.07011	8.94538	9.29276	9.12543	8.87021	8.99277	9.16724	8.99989
Hk2	ENSMUSG00000000628	ENSMUSG00000000628	-0.0660888	0.965879	-0.0983288	0.995681	-0.179442	0.837298	0.12864	0.982436		8.23818	8.35301	8.73819	8.30074	8.266	8.46359	8.763	8.68406	8.48766	8.59431	8.62922	8.48367	8.54765	8.4691	8.59467
Kmt5a	ENSMUSG00000049327	ENSMUSG00000049327	0.389672	0.632143	0.311935	0.879187	0.336443	0.676244	0.071616	0.992218		8.02553	8.47072	8.65666	8.21485	8.29619	8.51064	7.93993	8.28441	8.00193	8.14436	8.03459	8.13986	8.36533	7.65207	7.98674
Fgfr1	ENSMUSG00000031565	ENSMUSG00000031565	0.426594	0.712766	0.106176	0.995681	0.332278	0.794594	0.465598	0.7744		7.91444	7.50278	8.54648	7.31892	7.67003	7.80218	7.64265	7.93117	7.61956	8.07119	8.01918	7.77691	7.57424	7.29668	7.98674
Ptprk	ENSMUSG00000019889	ENSMUSG00000019889	-0.324836	0.569019	-0.427484	0.334518	-0.282853	0.621976	-0.332893	0.696296		8.07803	8.32351	8.26188	8.58944	8.6441	8.42391	8.35348	8.40721	8.73105	8.54471	8.56344	8.81917	8.43282	8.67946	8.52018
Arpc5	ENSMUSG00000008475	ENSMUSG00000008475	-0.287627	0.716729	-0.223202	0.940177	-0.233307	0.792879	-0.221043	0.964329		8.06322	8.08415	8.54115	8.4924	8.32577	8.60039	8.59885	8.53641	8.31816	8.39283	8.43769	8.59767	8.63264	8.27367	8.69213
Mtap	ENSMUSG00000062937	ENSMUSG00000062937	0.0115338	0.995885	0.146909	0.993883	-0.0244015	0.988899	0.143699	0.967914		8.65339	8.58453	8.80427	8.73281	8.5428	8.32206	8.78267	8.7196	8.63172	8.53749	8.68563	8.39683	8.62544	8.63057	8.77277
Gm5070	ENSMUSG00000096177	ENSMUSG00000096177	-0.3832	0.928817	0.0975188	0.995681	-0.136497	0.986915	-0.106463	0.993307		6.24278	6.94401	8.21908	7.33258	7.34365	7.73892	8.15645	7.18568	6.87139	7.63648	6.96286	7.17184	8.28084	7.23259	7.54419
Ddx27	ENSMUSG00000017999	ENSMUSG00000017999	-0.0446892	0.984235	0.119333	0.995681	0.00844283	0.995754	0.149799	0.9781		8.79452	8.55944	8.86532	8.44288	8.53859	8.80301	8.73298	8.74397	8.7452	8.65233	8.68237	8.55671	8.45328	9.07888	8.77988
Mbtps1	ENSMUSG00000031835	ENSMUSG00000031835	-0.00605234	0.995885	-0.0802725	0.995681	-0.0291823	0.988899	-0.156483	0.966979		8.49693	8.73104	8.75673	8.72506	8.90799	8.84701	8.78917	8.60263	8.70232	8.659	8.78315	8.80425	8.78892	8.61269	8.62263
Nsd3	ENSMUSG00000054823	ENSMUSG00000054823	-0.0318649	0.984379	0.0453153	0.995681	-0.059881	0.959191	-0.0598382	0.990293		9.02973	8.97445	8.90947	9.06691	9.09423	8.91538	9.03041	8.97624	9.07707	8.95317	8.99756	8.81917	9.12364	9.00132	8.8626
Gm29257	ENSMUSG00000100228	ENSMUSG00000100228	-0.416854	0.714279	-0.0164466	0.995681	-0.195132	0.917466	-0.156214	0.990293		7.85551	8.07001	8.37115	8.1775	8.36903	8.27327	8.70576	8.43313	7.57272	8.38076	8.02433	7.97199	8.81129	8.55771	8.14934
Utrn	ENSMUSG00000019820	ENSMUSG00000019820	-0.0374254	0.991488	-0.13846	0.995681	-0.12477	0.939586	0.0374338	0.993165		8.86451	8.64779	8.57287	8.73281	8.65967	8.58048	8.78267	8.61023	9.03738	8.68212	8.97643	8.82903	8.28084	8.91936	8.91522
Mdm2	ENSMUSG00000020184	ENSMUSG00000020184	0.636354	0.0820451	0.4108	0.603706	0.724762	0.0240862	0.526531	0.34365		7.88948	7.95158	8.53041	7.67037	7.70796	7.57147	7.41789	7.43698	7.51608	7.76579	7.74088	7.78706	7.54404	7.72709	7.32833
Ncapd2	ENSMUSG00000038252	ENSMUSG00000038252	-0.0523922	0.979617	0.0336191	0.995681	0.0976918	0.946219	-0.22134	0.95908		9.0067	8.84755	8.6039	9.00642	8.97485	9.14151	8.80529	8.8278	8.52504	8.94773	8.7617	8.64589	9.16144	8.80124	8.60271
Ldlr	ENSMUSG00000032193	ENSMUSG00000032193	0.0908767	0.945168	0.110385	0.995681	0.13111	0.908135	0.219687	0.932265		9.10394	8.95535	8.88019	8.85614	8.85488	8.54804	8.6604	9.03103	8.83394	8.90906	8.9387	8.75854	8.97872	8.97918	8.68836
Gm11517	ENSMUSG00000081249	ENSMUSG00000081249	-0.810395	0.139164	-0.411351	0.878392	-0.755943	0.163553	-0.37789	0.940635		7.06248	7.88043	7.72601	8.11169	7.82304	7.96463	8.91036	8.21138	7.62722	8.20035	7.78408	8.00281	8.38676	8.43289	8.37744
Ssbp3	ENSMUSG00000061887	ENSMUSG00000061887	0.15422	0.90469	-0.00261295	0.998686	-0.130445	0.93541	0.00586453	0.997629		8.67789	8.21844	8.48668	8.55781	8.42019	8.41494	8.33138	8.58347	8.84712	8.29337	8.30839	8.76626	8.28542	8.27367	8.4007
Snrpg	ENSMUSG00000057278	ENSMUSG00000057278	-0.342112	0.63162	-0.193253	0.988904	-0.224625	0.814494	-0.273634	0.920649		7.99466	8.24386	8.54382	8.47094	8.75696	8.43282	8.61722	8.6253	8.26022	8.52293	8.39851	8.51456	8.79855	8.64471	8.4099
Apbb2	ENSMUSG00000029207	ENSMUSG00000029207	0.0263909	0.992303	-0.241065	0.922293	0.0539072	0.985028	-0.028117	0.993307		7.8295	7.92825	8.49498	8.29726	8.13291	8.03069	8.00837	8.0917	8.13685	8.3848	8.4454	8.27946	8.0797	8.06868	8.17114
Nup93	ENSMUSG00000032939	ENSMUSG00000032939	0.22923	0.725411	0.0515106	0.995681	0.0845463	0.944146	-0.0251628	0.993307		8.77648	9.12227	8.87383	8.8514	9.00868	9.00475	8.78592	8.92235	8.8273	8.82252	9.05411	8.74558	8.86114	8.64822	8.58252
Ehd4	ENSMUSG00000027293	ENSMUSG00000027293	-0.0991977	0.943027	-0.0589068	0.995681	-0.047074	0.985028	-0.0348582	0.993165		9.00283	9.1393	8.75212	8.95878	9.0298	9.01962	8.92224	9.13736	8.9757	9.14606	8.95229	8.97385	9.07429	9.32485	8.73667
Scap	ENSMUSG00000032485	ENSMUSG00000032485	-0.469963	0.410596	-0.323744	0.848859	-0.433825	0.453888	-0.542761	0.349949		7.83822	7.61418	8.27157	8.43024	8.46961	8.54804	8.70232	8.16056	8.1947	8.12521	8.16169	8.48055	8.52463	8.21801	8.47269
Ccar1	ENSMUSG00000020074	ENSMUSG00000020074	-0.153437	0.879839	-0.32427	0.609845	0.0981763	0.943935	0.0211447	0.993307		8.15684	8.02673	8.40091	8.21853	8.18225	8.17578	8.10529	8.04202	8.19985	8.33981	8.63597	8.6063	8.51298	8.32726	8.2398
S100a1	ENSMUSG00000044080	ENSMUSG00000044080	-0.0851494	0.961849	-0.0281956	0.995681	-0.126564	0.937415	-0.0944328	0.990293		9.23521	9.32046	8.61156	9.24357	9.18847	9.08327	9.06563	9.16341	9.372	8.90906	9.30351	9.08502	9.01771	9.24123	9.22502
Ptgs1	ENSMUSG00000047250	ENSMUSG00000047250	-0.150136	0.855324	-0.295144	0.57807	0.0267201	0.988899	-0.170103	0.964166		8.50243	8.61408	8.49498	8.68836	8.62836	8.79266	8.43032	8.64021	8.44928	8.91464	8.73049	8.83394	8.72977	8.53131	8.78343
Sltm	ENSMUSG00000032212	ENSMUSG00000032212	-0.102135	0.92269	-0.329202	0.48919	0.0336927	0.986915	0.0685855	0.990293		8.38827	8.51315	8.45014	8.31112	8.37847	8.46359	8.39667	8.30328	8.5454	8.63212	8.85146	8.83638	8.41624	8.58363	8.65006
Hcfc1r1	ENSMUSG00000023904	ENSMUSG00000023904	-0.0951438	0.951127	-0.088186	0.995681	-0.242053	0.733707	-0.0297702	0.993307		8.40598	8.41587	8.60901	8.39487	8.50882	8.63556	8.763	8.79818	8.60481	8.31043	8.59843	8.76626	8.40368	8.82317	8.47269
Gm9794	ENSMUSG00000107176	ENSMUSG00000107176	-0.0756004	0.963295	-0.0867302	0.995681	-0.00318152	0.999106	-0.210676	0.966979		8.38827	8.50266	8.45582	8.77343	8.62043	8.5684	8.66747	8.55226	8.07096	8.69192	8.42214	8.48055	8.74312	8.48097	8.31517
Resf1	ENSMUSG00000032712	ENSMUSG00000032712	-0.0314941	0.992303	-0.362306	0.83299	-0.138247	0.944146	-0.143536	0.98912		8.19129	8.15955	8.11878	8.42068	8.28118	8.17578	8.23947	7.62116	8.78683	8.47077	8.44155	8.62056	7.9985	8.19897	8.34424
ENSMUSG00000120144	ENSMUSG00000120144	ENSMUSG00000120144	0.179351	0.894787	0.0739444	0.995681	0.201881	0.860877	0.190676	0.967914		8.80791	8.60919	8.55709	8.57515	8.49152	8.33162	8.38385	8.65498	8.31816	8.52658	8.59497	8.63469	8.32148	8.92517	8.05282
Siva1	ENSMUSG00000064326	ENSMUSG00000064326	-0.317817	0.716729	-0.0137256	0.995681	-0.191491	0.874345	-0.233332	0.966979		8.19129	8.29947	8.38014	8.52844	8.50882	8.53981	8.86187	8.36743	8.12066	8.19576	8.22128	8.48679	8.89145	8.5275	8.35381
Csnk1e	ENSMUSG00000022433	ENSMUSG00000022433	-0.124921	0.913121	0.0677627	0.995681	0.00374042	0.999106	0.0489601	0.992218		8.87302	8.78399	8.82418	8.81051	8.87836	8.63556	8.88935	8.77133	8.80721	8.98805	8.78922	8.46165	8.84574	9.16969	8.80799
Atp6v1e1	ENSMUSG00000019210	ENSMUSG00000019210	-0.0329313	0.991075	0.00658976	0.995681	-0.0260186	0.988899	0.00773285	0.995331		8.70675	8.32351	8.74052	8.69101	8.55533	8.54393	8.73634	8.50416	8.65064	8.71772	8.54562	8.53579	8.73646	8.56887	8.61071
Socs2	ENSMUSG00000020027	ENSMUSG00000020027	-0.193676	0.873815	-0.3968	0.609845	-0.37682	0.520466	-0.266961	0.939453		8.2836	8.00459	8.31911	8.47403	8.49152	8.46359	8.46726	8.2701	8.93616	8.60126	8.55634	8.65423	8.07443	8.47702	8.61071
Plpp2	ENSMUSG00000052151	ENSMUSG00000052151	-0.114114	0.905457	0.108932	0.995681	0.0497311	0.977849	-0.0300534	0.993165		9.06731	9.04122	8.95431	8.99573	8.97174	9.17376	8.95728	9.10815	8.83062	9.0503	8.89995	8.77394	9.29213	8.97078	9.11684
Tmem167	ENSMUSG00000012422	ENSMUSG00000012422	0.017015	0.994843	0.0404784	0.995681	0.10016	0.944146	-0.075344	0.990293		8.27077	8.35301	8.59621	8.54614	8.45184	8.48517	8.40092	8.38524	8.16869	8.36043	8.23023	8.53277	8.62183	8.16993	8.38679
Phip	ENSMUSG00000032253	ENSMUSG00000032253	-0.348338	0.646462	-0.606087	0.099328	-0.261521	0.767488	-0.263091	0.940635		7.9631	7.7176	7.98764	8.30767	8.13847	8.00104	7.87422	8.03639	8.48766	8.47456	8.34182	8.65146	8.20082	8.11004	8.4007
Sdhb	ENSMUSG00000009863	ENSMUSG00000009863	-0.058517	0.976231	0.0337388	0.995681	-0.0213054	0.989047	0.0722628	0.990293		9.60846	9.47872	8.9136	9.23632	9.28949	9.32742	9.31341	9.55049	9.25078	9.3822	9.29287	9.2917	9.29667	9.63571	9.28123
Atp5e	ENSMUSG00000016252	ENSMUSG00000016252	-0.224963	0.702231	-0.0156538	0.995681	-0.221245	0.661572	-0.140163	0.967914		9.34333	9.14268	9.00364	9.17888	9.28448	9.44	9.2884	9.42476	9.43446	9.3077	9.13499	9.08913	9.3169	9.4788	9.36165
Hars	ENSMUSG00000001380	ENSMUSG00000001380	-0.0614139	0.967569	-0.108078	0.995681	-0.0828205	0.956453	-0.111606	0.98912		8.15684	8.39899	8.55973	8.66426	8.53015	8.2683	8.44274	8.44592	8.52504	8.33565	8.65604	8.48055	8.361	8.44506	8.54126
Napa	ENSMUSG00000006024	ENSMUSG00000006024	-0.0610185	0.965879	0.0218796	0.995681	0.0504278	0.980748	-0.00380008	0.997901		8.47472	8.64779	8.74052	8.65613	8.69409	8.54804	8.685	8.4628	8.58528	8.44397	8.74618	8.62056	8.50516	8.80754	8.74397
Sf3b3	ENSMUSG00000033732	ENSMUSG00000033732	0.205568	0.752943	0.0998827	0.995681	0.126991	0.891467	0.221461	0.883109		9.08207	8.82246	8.98214	8.62039	8.80325	8.81669	8.763	8.83754	8.91754	8.92021	8.97643	8.69525	8.63622	8.86604	8.77633
Sh3pxd2a	ENSMUSG00000053617	ENSMUSG00000053617	0.0267741	0.991488	-0.0137018	0.995681	-0.0767026	0.959191	0.033074	0.993165		8.45784	8.39332	8.74052	8.56939	8.52165	8.44609	8.53455	8.46699	8.84054	8.61162	8.67255	8.38685	8.5963	8.38736	8.57026
Luc7l2	ENSMUSG00000029823	ENSMUSG00000029823	-0.187391	0.80614	-0.143537	0.993883	-0.0597233	0.968258	-0.114683	0.982436		8.72568	8.77965	8.65666	8.8514	8.85149	8.79266	8.76958	8.58732	8.95454	8.7618	8.88302	8.93099	8.86114	8.74984	9.08561
Uggt1	ENSMUSG00000037470	ENSMUSG00000037470	0.169841	0.83728	-0.186759	0.923383	0.1004	0.936562	-0.115006	0.982436		8.82117	8.63824	8.51689	8.63148	8.81024	8.87016	8.4632	8.60263	8.60481	8.66233	8.92774	8.9195	8.44104	8.53131	8.49447
Celf2	ENSMUSG00000002107	ENSMUSG00000002107	0.0652809	0.963295	-0.00282051	0.997425	-0.0131024	0.99086	0.0244739	0.993307		8.91897	9.01562	8.76819	8.99573	8.80325	8.81329	8.73634	8.91624	9.06866	8.85776	9.04906	8.7917	8.65401	8.96234	8.87262
Tmem14c	ENSMUSG00000021361	ENSMUSG00000021361	-0.323876	0.695561	-0.195013	0.993883	-0.265593	0.754788	-0.312767	0.854558		8.07064	7.91248	8.47833	8.46476	8.55117	8.46793	8.53455	8.57184	8.21009	8.54831	8.17566	8.38685	8.68202	8.56516	8.22945
Rpl14-ps1	ENSMUSG00000046721	ENSMUSG00000046721	0.32567	0.811216	0.312877	0.941612	0.149065	0.944146	0.541094	0.673864		9.73061	9.45986	8.61664	8.77343	8.85826	8.7647	8.72622	9.31518	9.43009	8.93128	9.24729	8.87021	8.61821	9.27117	9.07409
Afdn	ENSMUSG00000068036	ENSMUSG00000068036	-0.204222	0.795016	-0.132544	0.993883	-0.102456	0.937636	-0.0337363	0.992218		8.85164	8.9203	8.76819	8.81781	8.87169	8.94683	9.2179	8.87269	8.69869	9.04266	9.0338	8.84855	9.10824	8.94815	9.08274
Amotl2	ENSMUSG00000032531	ENSMUSG00000032531	0.0896278	0.956106	0.155066	0.995674	0.0397426	0.988797	0.0270377	0.993307		8.35827	8.0413	8.63679	8.37851	8.40642	8.25831	8.22516	8.45016	8.3276	8.02543	8.17102	8.43607	8.33477	8.17968	8.34424
Yy1	ENSMUSG00000021264	ENSMUSG00000021264	-0.0310535	0.9882	0.0740387	0.995681	0.0197573	0.988899	0.0434086	0.992218		8.78102	8.67608	8.79533	8.79825	8.72031	8.60039	8.74305	8.81142	8.6431	8.7618	8.60533	8.67078	8.88544	8.78537	8.67316
Psme2	ENSMUSG00000079197	ENSMUSG00000079197	-0.437735	0.65418	-0.132858	0.995681	-0.317239	0.783347	-0.229346	0.970517		7.7299	8.0771	8.32533	8.23681	8.266	8.3877	8.82755	8.39407	7.72328	8.40479	8.03459	8.14381	8.71289	8.45312	8.31517
Snrpd3	ENSMUSG00000020180	ENSMUSG00000020180	0.0807133	0.968596	-0.170754	0.995681	0.149909	0.937415	0.109346	0.990293		8.81676	8.80975	8.38313	8.62039	8.55117	8.53568	8.17146	8.60643	8.75222	8.82252	9.21158	8.40014	8.361	8.75962	8.64617
Stip1	ENSMUSG00000024966	ENSMUSG00000024966	0.114254	0.93164	0.0930798	0.995681	0.0920753	0.953032	0.154108	0.977376		9.6854	9.42417	8.93817	9.29853	9.13099	9.22597	9.25827	9.27273	9.31622	9.37411	9.33498	9.12559	9.19584	9.44889	9.11403
Tmod3	ENSMUSG00000058587	ENSMUSG00000058587	0.204017	0.892237	-0.0372661	0.995681	-0.0518582	0.986915	-0.0920044	0.990293		7.58196	8.17945	8.51417	8.23317	8.11042	8.3785	8.31796	7.973	8.29911	8.06114	8.29566	8.20568	8.10579	7.69347	8.02914
Mthfd2	ENSMUSG00000005667	ENSMUSG00000005667	0.172812	0.879839	0.235452	0.922954	0.239905	0.780808	0.354112	0.746342		9.69023	9.83083	9.24426	9.08114	9.35789	9.30818	9.29069	9.50232	9.29473	9.57629	9.40583	9.09118	9.46532	9.58345	9.22502
Wls	ENSMUSG00000028173	ENSMUSG00000028173	0.10307	0.949441	-0.0655685	0.995681	-0.0306688	0.988899	-0.120071	0.98912		8.12868	8.28729	8.5518	8.37521	8.57188	8.43282	8.28616	8.26529	8.54944	8.11554	8.43769	8.61772	8.13141	8.20376	8.37744
Dut	ENSMUSG00000027203	ENSMUSG00000027203	0.166301	0.913731	0.119212	0.995681	0.175135	0.91226	0.196742	0.974212		7.76692	7.98211	8.55973	7.89869	7.9037	8.08258	7.99156	8.03074	7.92942	7.80242	8.09465	8.19046	8.15658	7.666	8.11037
Brk1	ENSMUSG00000033940	ENSMUSG00000033940	-0.151947	0.879839	0.0499642	0.995681	-0.0524525	0.980748	-0.0150758	0.993307		8.94747	8.63344	8.61664	8.82265	8.68651	8.73619	8.73634	8.75086	8.87312	8.55549	8.58454	8.88919	9.053	8.89591	8.68457
Sec31a	ENSMUSG00000035325	ENSMUSG00000035325	-0.283732	0.6685	-0.299649	0.72441	-0.0973472	0.944146	-0.302535	0.753568		8.21158	8.64302	8.32533	8.66965	8.83787	8.58848	8.61722	8.39407	8.47498	8.60817	8.62583	8.84613	8.77923	8.50054	8.75484
Rpl31-ps8	ENSMUSG00000067870	ENSMUSG00000067870	0.314032	0.673674	0.183767	0.993883	0.227247	0.796912	0.283256	0.884294		9.58274	9.65012	8.99195	9.123	9.02379	9.28867	9.03041	9.27751	9.29233	9.17661	9.40187	9.15333	9.17628	9.25743	8.89571
Ubxn1	ENSMUSG00000071655	ENSMUSG00000071655	-0.137537	0.894787	0.0142114	0.995681	-0.0160335	0.989428	0.00668794	0.996997		9.35249	9.45442	8.90947	9.2775	9.12259	9.32024	9.05489	9.33594	9.38561	9.32249	9.21609	9.16506	9.43889	9.31161	9.40599
Ktn1	ENSMUSG00000021843	ENSMUSG00000021843	-0.134211	0.923226	-0.246394	0.922954	-0.0108011	0.994893	0.102917	0.990293		8.83866	9.00079	8.44729	8.6857	8.77851	8.53981	8.62087	8.52841	9.12926	9.04776	9.15158	8.83883	8.80811	8.92806	8.97841
Gm6630	ENSMUSG00000084299	ENSMUSG00000084299	-0.260375	0.861268	-0.15111	0.995681	0.0330395	0.989047	-0.15289	0.989259		7.71103	8.19907	8.32533	8.21853	8.14954	8.39684	8.1311	8.23122	7.83334	8.17728	8.36232	8.22448	8.70609	8.55396	7.60151
Snrpd2	ENSMUSG00000040824	ENSMUSG00000040824	-0.698552	0.0297343	-0.598078	0.145318	-0.456249	0.345622	-0.606101	0.157628		8.06322	8.14613	7.62372	8.60641	8.61644	8.41044	8.65329	8.18111	8.32289	8.83436	8.35416	8.3835	8.73979	8.55021	8.62263
Ergic1	ENSMUSG00000001576	ENSMUSG00000001576	0.0589148	0.961849	0.216281	0.807016	0.0669134	0.953044	0.0246778	0.993307		9.0067	9.24379	8.98214	9.06895	9.13378	8.95303	8.99712	9.0423	8.99655	8.81058	8.94958	8.82903	9.10565	8.92517	9.02405
Gorasp2	ENSMUSG00000014959	ENSMUSG00000014959	-0.200999	0.752943	-0.0881258	0.995681	-0.298458	0.405008	-0.12266	0.975915		8.69239	8.62862	8.63929	8.83949	8.59636	8.86688	9.06831	8.84721	8.92066	8.58733	8.84565	8.77394	8.80811	8.8417	8.9055
Ago2	ENSMUSG00000036698	ENSMUSG00000036698	0.0186875	0.993004	0.338804	0.462348	0.0446918	0.98263	0.0561383	0.990293		8.95951	8.94376	8.90532	8.89807	8.89818	8.84033	8.9915	8.85042	8.82397	8.7081	8.68563	8.39018	9.08482	8.90768	8.73301
Myh10	ENSMUSG00000020900	ENSMUSG00000020900	-0.377043	0.610091	-0.471721	0.465168	-0.462336	0.340196	-0.344967	0.789972		8.34609	8.28117	7.8734	8.47094	8.42931	8.63169	8.37524	8.49187	8.95454	8.44782	8.60877	8.82903	8.33477	8.72676	8.54544
Psmd11	ENSMUSG00000017428	ENSMUSG00000017428	0.161729	0.894787	0.0845623	0.995681	0.0310767	0.988899	0.123951	0.98912		8.37034	8.16621	8.6542	8.37521	8.3355	8.17046	8.42616	8.34939	8.39197	8.29337	8.36232	8.35307	8.42456	7.90797	8.39608
Rab34	ENSMUSG00000002059	ENSMUSG00000002059	-0.108235	0.921445	-0.0826882	0.995681	0.0200085	0.989047	-0.0774463	0.990293		8.29631	8.57955	8.61156	8.64523	8.58825	8.51485	8.37091	8.57184	8.51682	8.7081	8.43382	8.61487	8.71628	8.64822	8.46829
Naxe	ENSMUSG00000028070	ENSMUSG00000028070	-0.228457	0.741211	0.0898355	0.995681	-0.14147	0.88459	-0.0122953	0.994176		9.21526	9.1291	8.81536	9.11709	9.01474	9.06904	9.15388	9.19658	9.23833	9.21788	8.73992	8.90326	9.18854	9.36383	9.29122
Tyms	ENSMUSG00000025747	ENSMUSG00000025747	-0.170597	0.864651	-0.0844049	0.995681	-0.177955	0.840213	-0.0177961	0.993307		8.37034	8.2312	8.58069	8.58088	8.24035	8.42837	8.63176	8.54436	8.57739	8.42451	8.49452	8.55374	8.55524	8.34035	8.8045
Cdr2l	ENSMUSG00000050910	ENSMUSG00000050910	-0.147074	0.922802	0.00262105	0.999095	0.0825412	0.968258	-0.224767	0.967914		8.17072	8.26263	8.45865	8.44917	8.69409	8.43282	8.49535	8.27965	7.82003	8.38076	8.1381	8.38015	8.78247	8.30071	8.20323
Ppic	ENSMUSG00000024538	ENSMUSG00000024538	0.352789	0.64899	-0.00369512	0.997425	0.228657	0.824172	-0.111958	0.990293		7.99466	8.01939	8.40972	8.09576	8.46519	8.24825	7.96884	7.94925	7.8981	7.85569	8.10928	8.46482	7.82093	7.78569	7.84474
Ddx6	ENSMUSG00000032097	ENSMUSG00000032097	-0.0432942	0.977453	-0.125636	0.993883	-0.0170668	0.989047	-0.238652	0.780388		8.44076	8.66201	8.58069	8.77843	8.88168	8.74337	8.7464	8.51633	8.46646	8.66233	8.70823	8.69794	8.58522	8.7033	8.52865
Ndufa3	ENSMUSG00000035674	ENSMUSG00000035674	-0.106329	0.91046	-0.000377236	0.999777	-0.0545168	0.968258	-0.151418	0.967914		8.72097	8.65728	8.79981	8.78092	8.99953	8.86029	8.78267	8.78146	8.79025	8.66896	8.77093	8.75078	9.00668	8.65522	8.82528
ENSMUSG00000095041	ENSMUSG00000095041	ENSMUSG00000095041	-0.352721	0.483294	-0.344096	0.603706	-0.488328	0.115815	-0.0335802	0.993165		8.51879	8.45992	8.18528	8.40137	8.266	8.57647	8.81487	8.81799	8.9727	8.53023	8.73049	8.89389	8.53234	8.76933	8.88586
Fermt2	ENSMUSG00000037712	ENSMUSG00000037712	0.281846	0.894787	0.0970034	0.995681	0.137521	0.964722	0.0302488	0.993307		6.92184	7.1597	8.3621	7.69701	7.63895	7.50541	7.49146	7.55186	7.4911	7.40196	7.67027	7.56902	7.68912	6.81161	7.47576
Wdr26	ENSMUSG00000038733	ENSMUSG00000038733	0.0427885	0.977453	0.0553605	0.995681	0.0382871	0.985028	0.181217	0.950349		9.09669	9.23431	8.98607	8.91406	8.9434	8.91855	8.95728	9.0507	9.18482	9.1508	9.01061	8.98492	8.86114	9.15	9.15837
Dclk1	ENSMUSG00000027797	ENSMUSG00000027797	-0.197354	0.90469	-0.342684	0.89063	-0.275467	0.831321	-0.303974	0.95908		8.02553	7.69012	8.20565	8.38508	8.39716	8.07691	8.00279	7.99638	8.68774	8.05609	8.51664	8.38685	7.97605	7.95412	8.55791
Sbno2	ENSMUSG00000035673	ENSMUSG00000035673	-0.12979	0.904898	-0.160999	0.993883	-0.241843	0.695749	-0.0238074	0.993307		8.55099	8.41026	8.63679	8.57228	8.63231	8.48088	8.99431	8.56013	8.74871	8.63889	8.84273	8.6063	8.62904	8.50442	8.85252
Rpl19	ENSMUSG00000017404	ENSMUSG00000017404	0.120827	0.965879	0.274485	0.993883	0.0872664	0.985028	0.194472	0.98912		7.79407	7.50278	8.42138	7.55277	7.80915	7.94608	8.23472	7.60605	7.72328	7.45662	7.58212	7.99407	8.09541	7.08484	8.14383
Uqcc2	ENSMUSG00000024208	ENSMUSG00000024208	-0.170841	0.843611	-0.0166292	0.995681	-0.20984	0.762239	-0.121667	0.982436		8.54567	8.45448	8.67383	8.637	8.67889	8.74337	8.94569	8.70903	8.64687	8.66233	8.41431	8.65423	8.90933	8.5389	8.73301
Pafah1b2	ENSMUSG00000003131	ENSMUSG00000003131	-0.0806273	0.961849	0.00495234	0.996036	-0.0164365	0.989841	0.0281868	0.993307		8.4001	8.39899	8.6542	8.34183	8.58417	8.47226	8.57648	8.6513	8.27979	8.46697	8.49823	8.50536	8.45328	8.89886	8.3004
Arf5	ENSMUSG00000020440	ENSMUSG00000020440	0.312743	0.892237	0.479013	0.896556	0.352889	0.847455	0.478981	0.928947		10.047	9.91829	8.65913	9.1694	9.1804	9.19749	8.92519	9.49208	9.441	9.0503	9.4078	9.06011	9.11596	9.43269	9.46895
Magt1	ENSMUSG00000031232	ENSMUSG00000031232	-0.0410479	0.991316	0.012604	0.995681	-0.109271	0.946783	0.0352593	0.993307		9.08574	9.05565	8.52231	8.94106	8.86163	8.79612	8.74973	8.94054	9.29233	8.79854	8.91669	8.95145	8.5963	9.21304	8.95661
Ccdc88a	ENSMUSG00000032740	ENSMUSG00000032740	-0.0426394	0.991488	-0.434369	0.776298	0.298802	0.824172	0.0648319	0.992218		7.63298	7.90454	8.02634	7.79398	7.98009	7.6191	7.30453	7.15485	8.08772	8.33148	8.0749	8.4553	7.65419	7.76642	8.24495
Fundc2	ENSMUSG00000031198	ENSMUSG00000031198	-0.281982	0.446189	-0.053104	0.995681	-0.213586	0.645855	0.0239502	0.993307		9.04488	9.10156	8.82418	8.95878	8.95921	8.97456	9.2792	9.18645	9.12926	9.16728	9.03891	8.90792	9.31243	9.29602	9.19075
Brd3	ENSMUSG00000026918	ENSMUSG00000026918	-0.230369	0.755701	-0.158296	0.993883	-0.304664	0.541581	-0.235514	0.920894		9.00283	8.73553	8.48111	8.94994	8.89818	9.08609	8.98585	8.9193	9.22324	8.81357	8.84856	9.03477	8.85192	9.015	9.05076
Ppa1	ENSMUSG00000020089	ENSMUSG00000020089	-0.0671501	0.96021	-0.0399558	0.995681	-0.0140807	0.989792	-0.0741558	0.990293		8.38232	8.49739	8.63929	8.70683	8.5002	8.54804	8.54611	8.63278	8.4054	8.49335	8.67583	8.4961	8.61094	8.50829	8.63052
Uap1l1	ENSMUSG00000026956	ENSMUSG00000026956	0.225453	0.753981	0.118378	0.995681	0.0978978	0.93969	0.203428	0.957909		9.57232	9.61646	9.16323	9.1541	9.19115	9.41323	9.25593	9.50232	9.31385	9.41017	9.44481	9.15333	9.28986	9.27117	9.13637
Lyar	ENSMUSG00000067367	ENSMUSG00000067367	0.0112128	0.995885	-0.109175	0.995681	0.0824041	0.956453	0.257811	0.883396		8.96748	8.71295	8.6932	8.4863	8.60844	8.51904	8.58771	8.8278	8.70956	8.93404	9.06666	8.68171	8.55902	9.00681	8.74397
Trib2	ENSMUSG00000020601	ENSMUSG00000020601	-0.146797	0.894787	-0.0704363	0.995681	-0.0802543	0.956681	-0.214159	0.95908		8.87726	9.10503	8.59621	9.01492	9.19916	9.01962	8.84948	9.03949	8.94538	8.90344	8.98704	8.9195	9.14895	9.14752	8.69213
Thbs2	ENSMUSG00000023885	ENSMUSG00000023885	-0.241938	0.740404	-0.537114	0.0728282	-0.414949	0.231209	-0.234192	0.925538		8.04827	8.12576	8.12949	8.22587	8.27108	8.49796	8.50722	8.33571	8.67671	8.41271	8.69212	8.76882	8.31255	8.27821	8.43264
Tomm22	ENSMUSG00000022427	ENSMUSG00000022427	0.0338716	0.993088	0.0131411	0.995681	0.178251	0.93837	-0.142351	0.990293		7.28295	7.78841	8.40972	8.00486	8.18763	7.96463	7.73978	7.81108	7.66492	7.88445	7.95041	7.8706	8.30356	7.37511	7.81735
Hells	ENSMUSG00000025001	ENSMUSG00000025001	-0.281496	0.752943	-0.226206	0.953474	-0.124947	0.93969	-0.0710644	0.991778		8.03315	8.13937	8.54914	8.20746	8.38316	8.42391	8.49137	8.17087	8.49186	8.68866	8.47206	8.29377	8.79535	8.36191	8.44611
Ralbp1	ENSMUSG00000024096	ENSMUSG00000024096	0.141585	0.901528	0.0979708	0.995681	0.0517381	0.984334	0.241233	0.927156		8.65832	9.04484	8.73118	8.46165	8.53438	8.73619	8.6604	8.83754	8.80045	8.41271	8.79827	8.90559	8.75965	8.71004	8.55791
Micos10	ENSMUSG00000050608	ENSMUSG00000050608	0.208512	0.903543	-0.127275	0.995681	0.00905933	0.996577	-0.284391	0.966979		7.48531	7.52368	8.25863	8.14303	8.19299	7.93984	8.02498	7.92509	7.39565	7.96746	7.67684	8.13986	7.76964	7.26956	7.74651
Hsbp1	ENSMUSG00000031839	ENSMUSG00000031839	0.2256	0.747908	0.0867683	0.995681	0.335897	0.395901	0.133571	0.977376		8.73037	8.82667	8.61918	8.59512	8.5002	8.67365	8.23472	8.46699	8.46218	8.51926	8.59843	8.77903	8.40788	8.7033	8.36331
Smc2	ENSMUSG00000028312	ENSMUSG00000028312	-0.179219	0.850804	-0.430262	0.326096	0.0778338	0.959191	0.062082	0.990457		8.25782	8.43254	8.21238	8.30421	8.20365	8.20208	8.04141	8.12919	8.46646	8.87506	8.7617	8.52369	8.36964	8.51215	8.54544
Pdia4	ENSMUSG00000025823	ENSMUSG00000025823	-0.635279	0.550163	-0.491398	0.84379	-0.64694	0.46251	-0.00770407	0.997989		8.07803	8.06288	6.93082	7.84729	7.82994	7.64233	8.01393	8.01938	8.96667	8.40479	8.43769	7.84653	7.95898	8.59823	8.54544
Ezr	ENSMUSG00000052397	ENSMUSG00000052397	-0.0184593	0.993753	0.164516	0.993883	0.0872164	0.951899	0.176169	0.967914		9.29029	9.25007	8.93002	9.00642	8.89818	9.046	8.95728	9.21662	9.0345	9.11484	9.06916	8.78917	9.16144	9.40388	8.92809
Tle5	ENSMUSG00000054452	ENSMUSG00000054452	-0.0281946	0.991488	0.102064	0.995681	0.0290345	0.988899	-0.0295769	0.993307		9.20855	9.15948	8.76362	9.08114	9.0653	9.09454	8.91334	9.17881	8.96062	9.16024	8.86876	8.79673	8.90933	9.37872	8.89244
Erc1	ENSMUSG00000030172	ENSMUSG00000030172	-0.239201	0.842331	-0.135351	0.995681	-0.182592	0.903055	0.0351835	0.993307		9.01056	8.66201	8.39501	8.60921	8.71659	8.68489	8.51508	8.84721	9.2131	8.78639	8.91669	8.81173	8.58892	9.2319	8.93447
Tra2b	ENSMUSG00000022858	ENSMUSG00000022858	0.148545	0.860101	0.0774904	0.995681	0.134599	0.870239	0.335783	0.493915		8.90243	8.85582	8.84598	8.37521	8.55117	8.67365	8.79886	8.75086	8.64687	8.78639	8.7801	8.80425	8.53234	8.88404	8.72198
Clic4	ENSMUSG00000037242	ENSMUSG00000037242	0.215468	0.856274	0.248782	0.938299	0.18216	0.887194	0.0157047	0.994176		8.01788	8.33538	8.57548	8.27621	8.3355	8.35056	8.28156	8.19632	7.97216	8.00462	8.02433	8.22821	8.40368	7.71373	8.17114
Gng12	ENSMUSG00000036402	ENSMUSG00000036402	0.0954809	0.960782	-0.0538955	0.995681	0.190798	0.880553	-0.107966	0.990293		7.58196	8.10511	8.44157	8.18505	8.29121	8.13813	7.97456	7.68729	8.04832	8.06617	8.06992	8.30442	8.10061	7.95412	7.95567
Rtraf	ENSMUSG00000021807	ENSMUSG00000021807	-0.089797	0.970432	0.0230833	0.995681	0.0371313	0.988899	-0.100142	0.990293		7.4516	8.01201	8.45582	7.9877	8.2862	8.13813	8.28616	7.91899	7.75858	8.07618	7.82602	8.13589	8.46945	7.77929	8.05868
Rabggtb	ENSMUSG00000038975	ENSMUSG00000038975	0.204907	0.827613	0.1198	0.995681	0.375617	0.384665	0.10714	0.98912		8.07064	8.45992	8.59621	8.28326	8.39716	8.20208	7.91638	8.21138	7.94789	8.24539	8.32102	8.28305	8.28997	8.23213	8.06451
Smarca5	ENSMUSG00000031715	ENSMUSG00000031715	-0.00583866	0.996063	-0.0667009	0.995681	0.137601	0.93541	0.00381438	0.998729		7.97897	8.26884	8.57548	8.28677	8.24035	8.37388	8.01947	8.13446	8.33697	8.47834	8.39454	8.23193	8.45328	7.91965	8.49447
Cops6	ENSMUSG00000019494	ENSMUSG00000019494	-0.261218	0.827613	-0.147946	0.995681	-0.179025	0.908135	-0.294982	0.940635		7.7299	7.54429	8.28121	8.45854	7.96137	8.09947	8.17146	8.1862	7.85308	8.08116	8.02947	8.03299	8.33918	8.14528	7.96818
Chmp2a	ENSMUSG00000033916	ENSMUSG00000033916	0.212294	0.842331	0.104962	0.995681	0.310771	0.649333	0.297079	0.882143		8.13577	8.02673	8.565	7.92146	7.95507	8.06549	8.11567	7.92509	7.84653	8.21401	8.06493	8.22448	8.25776	7.77287	8.12161
Mylk	ENSMUSG00000022836	ENSMUSG00000022836	-0.650769	0.523856	-0.186901	0.995681	-0.578782	0.57192	-0.321205	0.967914		8.28997	7.81409	6.85544	8.02603	8.10475	8.08258	8.13621	8.33571	8.48344	7.75959	7.50307	8.39683	8.07443	8.86302	8.10472
Atp1b3	ENSMUSG00000032412	ENSMUSG00000032412	0.0250471	0.993753	-0.0814085	0.995681	-0.130613	0.944146	-0.0648712	0.992218		7.7205	7.81409	8.43007	8.07966	8.04673	8.17578	8.24421	8.05877	8.18954	7.81443	8.14285	8.34278	8.06382	7.63092	8.27546
Tcirg1	ENSMUSG00000001750	ENSMUSG00000001750	-0.544027	0.0880174	-0.384683	0.542697	-0.502895	0.124079	-0.255319	0.920649		8.08537	8.10511	8.34383	8.40137	8.39251	8.53154	8.93401	8.47117	8.6164	8.64898	8.64938	8.40344	8.50516	8.76286	8.89244
Rfc1	ENSMUSG00000029191	ENSMUSG00000029191	-0.169748	0.849382	-0.10963	0.995681	-0.123397	0.915114	0.00454595	0.997635		8.99505	9.21194	8.78409	8.91406	9.07694	8.99876	8.96878	9.03949	9.33739	9.06796	9.23177	9.02408	9.23182	9.23657	9.03003
Sin3b	ENSMUSG00000031622	ENSMUSG00000031622	0.144011	0.894787	0.00325969	0.997425	0.0830095	0.956453	0.133047	0.980471		8.2513	8.21844	8.5518	8.38835	8.10475	8.15976	8.40938	8.33571	8.05968	8.37266	8.32938	8.36329	8.21047	8.25995	8.17654
Clmp	ENSMUSG00000032024	ENSMUSG00000032024	-0.366948	0.822467	-0.668944	0.53935	-0.566623	0.546756	-0.308243	0.967914		7.94706	7.74456	7.14995	8.00486	7.63107	8.14899	7.96311	8.15018	8.44495	8.07119	8.32938	8.47113	7.09047	8.49665	8.08763
Nhp2	ENSMUSG00000001056	ENSMUSG00000001056	-0.0677856	0.963295	0.168018	0.991184	0.0678006	0.968258	0.264038	0.850935		9.3616	9.32344	9.03624	8.93883	9.13657	8.85367	9.04406	9.26794	9.20544	9.24254	9.16565	8.78411	9.20069	9.45091	9.26612
Rest	ENSMUSG00000029249	ENSMUSG00000029249	0.135536	0.926443	0.189111	0.993883	0.173456	0.897305	0.30893	0.882143		8.92308	8.83506	8.74749	8.54026	8.35953	8.66989	8.47534	8.64021	8.85039	8.66565	8.73364	8.53879	8.17641	9.015	8.78696
Utp4	ENSMUSG00000041438	ENSMUSG00000041438	0.0880831	0.963295	-0.0395404	0.995681	0.229361	0.840213	-0.0167243	0.994176		7.7015	7.92039	8.48945	8.0176	8.12732	8.18108	7.71269	8.05877	7.8066	8.11554	8.19408	8.0833	8.22005	7.95979	7.80346
Pkp4	ENSMUSG00000026991	ENSMUSG00000026991	-0.0171366	0.993093	-0.0583428	0.995681	-0.177914	0.820584	-0.00879827	0.995331		9.0894	8.82246	8.75903	8.92086	9.06237	8.69603	9.04678	9.15823	8.99655	9.02469	8.97643	8.84613	8.78892	9.04995	8.87594
Nr2f1	ENSMUSG00000069171	ENSMUSG00000069171	-0.433065	0.632143	-0.588547	0.373891	-0.290233	0.800255	-0.264272	0.967914		7.97106	7.68084	7.58276	7.95717	7.89715	8.15976	7.59152	8.12919	8.2943	7.96207	8.23468	8.68714	7.9417	8.38315	8.16572
Eea1	ENSMUSG00000036499	ENSMUSG00000036499	0.19957	0.890642	-0.0759772	0.995681	0.217057	0.857243	0.258499	0.966979		8.88149	8.88034	8.44729	8.63424	8.59231	8.19686	8.34026	8.44167	8.77309	8.98805	8.95499	8.46482	8.23903	8.55021	8.80101
Emp2	ENSMUSG00000022505	ENSMUSG00000022505	0.0330675	0.991488	-0.017163	0.995681	-0.139852	0.904319	0.0510921	0.992218		8.97145	9.07348	8.59878	8.92987	8.91124	8.64709	8.81487	9.13209	9.11025	8.79854	8.88018	9.02193	8.76947	8.87507	8.91522
Rp9	ENSMUSG00000032239	ENSMUSG00000032239	-0.179395	0.795016	-0.0193199	0.995681	-0.0760563	0.944146	0.113168	0.980471		8.82556	8.89646	8.72649	8.65613	8.56776	8.86688	8.8772	8.90084	8.88914	8.80457	8.72099	8.95821	8.99835	9.04463	8.92809
Sf3b6	ENSMUSG00000037361	ENSMUSG00000037361	0.255207	0.913731	0.0114056	0.995681	0.0173493	0.995434	0.0954352	0.992218		6.87174	7.25028	8.27157	7.53516	7.47264	7.53054	7.77949	7.57534	7.38665	7.49443	7.44273	7.8171	7.78263	6.53623	7.4845
Setd5	ENSMUSG00000034269	ENSMUSG00000034269	-0.0479755	0.977453	-0.115451	0.995681	-0.0420144	0.985028	0.0256788	0.993307		9.03353	9.04122	8.565	8.86791	8.82067	8.89295	8.95439	8.98795	8.83724	9.02985	8.88302	9.0809	8.88544	9.09442	8.8045
Actr1a	ENSMUSG00000025228	ENSMUSG00000025228	-0.196864	0.842331	0.130945	0.995681	-0.200067	0.831321	0.115698	0.98912		9.06731	9.22157	8.60646	8.8323	8.79974	8.95922	9.19606	9.10547	9.2308	8.87219	8.76478	8.90792	9.14895	9.42451	8.90225
Gna11	ENSMUSG00000034781	ENSMUSG00000034781	-0.53512	0.10176	-0.514346	0.172423	-0.363557	0.452769	-0.450525	0.360593		7.94706	8.2564	7.82592	8.53141	8.35475	8.47657	8.37955	8.17087	8.54135	8.42059	8.41038	8.70599	8.39101	8.53131	8.68836
Zfas1	ENSMUSG00000074578	ENSMUSG00000074578	0.609159	0.102219	0.495451	0.374609	1.06199	2.45251e-05	0.796874	0.0122236		7.84689	7.91248	8.353	7.5233	7.23353	7.04098	7.08971	7.03582	6.95898	7.58833	7.48822	7.66022	7.38272	7.48136	7.54419
Atp6ap2	ENSMUSG00000031007	ENSMUSG00000031007	0.15933	0.900548	-0.086162	0.995681	0.215395	0.831321	0.18822	0.967914		8.77648	8.80549	8.40679	8.36528	8.4018	8.66233	8.05225	8.64021	8.60092	8.7241	8.57754	8.93099	8.52076	8.54268	8.46389
Rabl6	ENSMUSG00000015087	ENSMUSG00000015087	-0.214748	0.812248	-0.133272	0.995681	-0.227746	0.772488	-0.139859	0.980471		9.0636	9.01193	8.41848	9.04426	9.01777	8.89295	9.00272	9.11884	9.09928	8.99069	8.92222	9.02622	8.88544	9.2225	9.05663
Pfdn5	ENSMUSG00000001289	ENSMUSG00000001289	-0.0643496	0.963295	-0.0241774	0.995681	-0.156837	0.840213	0.0855631	0.990293		8.62342	8.79263	8.62675	8.64249	8.68651	8.44609	8.82439	8.8278	8.85693	8.51926	8.69859	8.87021	8.55524	8.81068	8.85252
Emd	ENSMUSG00000001964	ENSMUSG00000001964	-0.0153849	0.994521	-0.0124406	0.995681	0.151128	0.84798	-0.0607043	0.990293		8.5079	8.53905	8.60646	8.5549	8.6519	8.63941	8.39667	8.57184	8.22531	8.56262	8.4454	8.67898	8.68548	8.56144	8.45058
Prkag1	ENSMUSG00000067713	ENSMUSG00000067713	-0.190825	0.894787	-0.115218	0.995681	-0.177759	0.910775	0.277705	0.95908		8.95149	8.6043	8.1955	8.31457	8.42931	8.25329	8.43861	9.0423	8.81058	8.68212	8.69859	8.78411	8.42041	9.07888	8.81839
Frmd4a	ENSMUSG00000026657	ENSMUSG00000026657	0.252222	0.790564	0.0332639	0.995681	0.159727	0.902465	0.254013	0.939453		7.95511	8.20556	8.565	8.02603	7.94875	8.09947	8.1311	7.93117	8.27493	8.21401	8.41823	8.0833	7.9417	8.06868	8.07033
Med1	ENSMUSG00000018160	ENSMUSG00000018160	-0.00549446	0.996063	0.0645469	0.995681	-0.117247	0.93837	0.120667	0.98912		8.66324	8.68074	8.70518	8.59512	8.61245	8.48088	8.82755	8.76794	8.80383	8.57679	8.85146	8.40014	8.32592	8.97358	8.6959
Prrc2a	ENSMUSG00000024393	ENSMUSG00000024393	0.568107	0.26009	0.422116	0.680868	0.610431	0.157613	0.0880221	0.990293		8.08537	8.13937	8.38014	8.13915	8.09905	8.13813	7.60631	7.75051	7.46569	7.54575	7.8952	7.91757	8.08496	7.14577	7.57722
Gadd45g	ENSMUSG00000021453	ENSMUSG00000021453	0.994294	0.0521792	0.386267	0.921832	0.772238	0.212952	0.94566	0.10888		7.27012	7.2996	8.24557	6.7553	6.82778	6.74436	6.81191	6.88118	7.11968	7.04231	7.56098	7.305	6.17225	6.88492	7.00325
Magoh	ENSMUSG00000028609	ENSMUSG00000028609	0.291792	0.791527	-0.0772717	0.995681	0.252243	0.824172	0.0250039	0.993307		7.64297	7.65265	8.34077	7.84252	7.99857	7.88893	7.67108	7.60605	7.77936	7.94032	7.80819	8.24304	7.74993	7.49703	7.68723
Foxc1	ENSMUSG00000050295	ENSMUSG00000050295	-0.245616	0.714279	-0.0238089	0.995681	-0.154181	0.861095	-0.144796	0.970522		8.64347	8.52875	8.42718	8.72765	8.61245	8.67741	8.68151	8.59882	8.76616	8.39283	8.38655	8.82903	8.75306	8.85392	8.71086
Ndufa11	ENSMUSG00000002379	ENSMUSG00000002379	-0.2567	0.72561	-0.0993014	0.995681	-0.342834	0.465091	-0.178482	0.967914		9.13259	9.17608	8.50871	9.03594	9.20978	9.16041	9.41984	9.24617	9.22324	8.99598	9.04653	9.12559	9.12874	9.30049	9.20667
Dnajc2	ENSMUSG00000029014	ENSMUSG00000029014	-0.229423	0.781145	-0.133967	0.995681	-0.0203425	0.989047	0.0444185	0.992218		8.6082	8.63824	8.49222	8.5225	8.34033	8.71442	8.49535	8.68406	8.60868	8.64226	8.81325	8.67078	8.68202	9.09184	8.58658
Ccnb1	ENSMUSG00000041431	ENSMUSG00000041431	0.159208	0.918562	0.267896	0.938299	0.270157	0.796912	0.111856	0.990293		7.93084	7.69012	8.48945	8.07153	7.89715	7.96463	7.94576	7.8242	7.69439	7.8958	7.81416	7.7718	8.03696	7.59495	8.12161
Lman2	ENSMUSG00000021484	ENSMUSG00000021484	-0.0459659	0.979617	-0.0272947	0.995681	-0.107433	0.933395	-0.198451	0.95908		8.54034	8.62862	8.51689	8.74563	8.65579	8.86359	8.86802	8.60263	8.50439	8.44782	8.57051	8.72724	8.73312	8.43696	8.63445
Zmpste24	ENSMUSG00000043207	ENSMUSG00000043207	-0.12449	0.924124	-0.142572	0.995681	0.0545446	0.984334	-0.0994396	0.990293		8.29631	8.34128	8.43007	8.44288	8.4018	8.52738	7.95735	8.44167	8.46646	8.53386	8.37852	8.58026	8.35231	8.74984	8.3004
Mff	ENSMUSG00000026150	ENSMUSG00000026150	0.0226756	0.99551	0.113888	0.995681	0.074808	0.984334	0.0432986	0.993307		7.47416	7.83096	8.39501	7.88021	7.81611	8.05975	8.1311	7.88182	7.61186	7.64994	7.75336	8.10781	8.17148	7.93123	7.67964
Col16a1	ENSMUSG00000040690	ENSMUSG00000040690	0.0236347	0.991488	-0.0352317	0.995681	0.0331165	0.986915	-0.198333	0.925538		8.54567	8.59445	8.50871	8.72247	8.79622	8.71442	8.519	8.4159	8.60481	8.39683	8.58104	8.74297	8.4973	8.58729	8.4858
Golim4	ENSMUSG00000034109	ENSMUSG00000034109	-0.237709	0.857188	-0.352672	0.82826	-0.341695	0.69212	-0.308496	0.937456		8.46349	8.28117	7.97977	8.50451	8.51311	8.63941	8.41779	8.23122	8.99655	8.33981	8.77093	8.64589	8.13648	8.63765	8.62263
Ereg	ENSMUSG00000029377	ENSMUSG00000029377	0.886178	0.16917	0.283318	0.993883	0.979539	0.0859835	0.947398	0.17712		7.50735	7.40476	8.20228	6.69314	6.92116	6.89384	6.86209	6.80381	6.75033	7.69611	7.8725	6.58752	6.88891	6.56626	7.17493
Mrpl12	ENSMUSG00000039640	ENSMUSG00000039640	0.0333391	0.991488	0.131249	0.995681	0.0814139	0.956453	0.238267	0.927156		9.18481	9.00822	8.84814	8.66695	8.73508	8.92804	8.77614	9.12945	8.87634	9.00648	8.76786	8.87259	8.89743	9.22955	8.77988
Dst	ENSMUSG00000026131	ENSMUSG00000026131	-0.0851578	0.961849	-0.0901785	0.995681	-0.0472705	0.986154	0.155434	0.980674		9.11475	9.20549	8.52231	8.94106	8.86163	8.62004	9.13615	8.75086	9.12926	9.2224	9.07165	8.86303	9.01771	9.08667	9.05663
Gm12593	ENSMUSG00000081432	ENSMUSG00000081432	-0.0833972	0.984011	0.198567	0.995681	-0.115984	0.973335	-0.125082	0.990293		7.19061	7.52368	8.23238	7.79891	7.87064	7.88244	8.20586	7.90052	7.26426	7.60916	7.24491	7.70375	8.31255	7.70026	7.19635
Adamts1	ENSMUSG00000022893	ENSMUSG00000022893	-0.439994	0.661971	-0.276617	0.97157	-0.459796	0.560455	-0.592744	0.481978		7.83822	7.40476	7.65369	8.43657	8.2862	7.8954	8.32692	7.75737	8.1422	7.6297	7.65706	8.33242	7.7631	8.12525	8.29048
Kras	ENSMUSG00000030265	ENSMUSG00000030265	-0.15992	0.874736	-0.144121	0.993883	-0.199461	0.799712	-0.0415856	0.992218		8.74899	8.69924	8.60901	8.57802	8.69031	8.89617	8.71261	8.73358	9.15598	8.82845	8.73992	8.90559	8.69925	8.98196	8.83213
Gm15501	ENSMUSG00000087412	ENSMUSG00000087412	0.412143	0.697204	0.410442	0.824104	0.39912	0.666618	0.637631	0.367171		9.62115	9.45714	8.64428	8.68037	8.50882	8.78224	8.37524	9.0756	9.12926	8.82549	9.06416	8.75337	8.54765	9.07105	8.98458
Ptpa	ENSMUSG00000039515	ENSMUSG00000039515	0.0707168	0.965879	0.267734	0.888255	0.0169634	0.989792	0.0681928	0.991778		9.74227	9.62374	8.97622	9.46744	9.40484	9.35347	9.30437	9.52259	9.54374	9.30345	9.32456	8.98492	9.51288	9.42656	9.27118
Kif2a	ENSMUSG00000021693	ENSMUSG00000021693	-0.0337537	0.991488	-0.221909	0.949518	-0.108711	0.944146	-0.00482441	0.997858		8.27077	8.44355	8.51689	8.41748	8.50451	8.34112	8.33583	8.33112	8.84712	8.79248	8.76478	8.31147	8.42041	8.32726	8.59467
Smc3	ENSMUSG00000024974	ENSMUSG00000024974	0.00460593	0.997408	-0.351911	0.653656	-0.115335	0.93969	-0.169994	0.967914		8.36432	8.32946	8.25863	8.47403	8.56363	8.41044	8.22516	8.25079	8.75222	8.59779	8.80428	8.58026	8.04777	8.44506	8.4099
Mta2	ENSMUSG00000071646	ENSMUSG00000071646	0.147023	0.937488	0.029258	0.995681	0.242848	0.84798	0.00801651	0.997547		7.57153	7.77975	8.40091	8.06337	8.04673	7.77441	7.58406	7.72974	7.88538	7.94032	8.14285	7.73556	8.10061	7.52022	7.81735
Gapdh	ENSMUSG00000057666	ENSMUSG00000057666	0.326371	0.956106	0.391683	0.995681	0.0762573	0.989147	0.41533	0.98912		6.72896	6.18645	8.12949	6.8246	6.65213	7.07554	7.62096	6.9665	6.85843	6.68495	6.67884	7.21761	7.13167	5.25392	7.58537
Dlst	ENSMUSG00000004789	ENSMUSG00000004789	0.199673	0.842331	0.155962	0.993883	0.173124	0.867461	0.175608	0.967914		8.23158	8.11891	8.58329	8.10375	8.2862	8.09387	8.08431	8.37636	8.00781	8.21853	8.02947	8.28305	8.24843	8.14528	8.01112
Sod2	ENSMUSG00000006818	ENSMUSG00000006818	0.110904	0.963295	-0.22413	0.995681	-0.0372145	0.988899	-0.165327	0.98912		7.67253	7.44915	8.22242	7.97033	8.16599	7.82267	8.0737	7.80448	7.69439	7.77196	8.09465	8.24304	7.82093	7.08484	8.08763
Gfpt1	ENSMUSG00000029992	ENSMUSG00000029992	-0.15638	0.899386	-0.282112	0.84379	-0.238153	0.782161	-0.371575	0.690164		7.77603	7.85591	8.29712	8.45542	8.36429	8.30274	8.50722	8.06983	8.11522	8.2674	8.35416	8.24304	8.06914	8.22744	8.19261
Slc25a24	ENSMUSG00000040322	ENSMUSG00000040322	0.0545034	0.976231	0.0242662	0.995681	0.0595609	0.976779	-0.104087	0.98912		8.56682	8.53905	8.71942	8.55781	8.88168	8.70342	8.53841	8.60263	8.52504	8.82845	8.58104	8.32547	8.70609	8.56516	8.39144
Maged1	ENSMUSG00000025151	ENSMUSG00000025151	-0.174779	0.894787	-0.1223	0.995681	-0.163168	0.908135	-0.368019	0.7509		8.00244	8.26263	8.18185	8.58659	8.6004	8.35056	8.47936	8.28441	8.16343	8.27611	8.01918	8.48679	8.51688	7.90797	8.48144
Mybbp1a	ENSMUSG00000040463	ENSMUSG00000040463	-0.00685282	0.995885	0.104721	0.995681	0.155997	0.840213	0.255648	0.78039		8.94343	8.91635	8.84598	8.61481	8.78207	8.53568	8.76629	8.81142	8.65439	8.94773	8.82806	8.59767	8.80811	9.07105	8.82528
Dcaf13	ENSMUSG00000022300	ENSMUSG00000022300	0.0262465	0.993088	-0.218948	0.993883	0.401143	0.592646	0.0322693	0.993307		7.56103	7.63354	8.2844	7.71797	8.02886	7.78836	7.62823	7.55973	7.24447	8.09107	8.08974	8.10781	8.14657	7.70026	7.66435
Lrrfip1	ENSMUSG00000026305	ENSMUSG00000026305	0.364359	0.721829	0.0626715	0.995681	0.178975	0.916943	0.620485	0.34365		8.57206	8.31154	8.35604	7.79398	7.96764	7.63463	8.03048	8.04202	8.57739	8.24095	8.50193	8.30795	7.56675	8.51985	7.91749
Cd109	ENSMUSG00000046186	ENSMUSG00000046186	0.467685	0.752943	0.203986	0.995681	0.515335	0.675287	0.363052	0.967914		7.09195	7.48157	8.26511	7.43742	7.36279	7.2571	7.24904	7.1127	7.2544	7.46426	7.41158	7.64356	7.41646	6.28858	7.70975
Ctsz	ENSMUSG00000016256	ENSMUSG00000016256	-0.161149	0.91046	-0.10461	0.995681	-0.080354	0.968258	-0.0301074	0.993307		8.01788	8.04853	8.29078	8.24405	8.14402	8.08258	8.43032	8.12389	8.0426	8.3231	7.77187	8.50228	8.04237	8.48097	8.31026
Kpna4	ENSMUSG00000027782	ENSMUSG00000027782	0.0103527	0.995885	0.123592	0.995681	0.0647938	0.968258	0.190371	0.966979		8.71151	8.74446	8.71706	8.57228	8.50882	8.52322	8.65329	8.72311	8.60092	8.53386	8.81026	8.43929	8.90933	8.80124	8.37275
Gnl3	ENSMUSG00000042354	ENSMUSG00000042354	0.222657	0.81293	-0.0681614	0.995681	0.378275	0.427414	0.247936	0.935013		8.44648	8.30551	8.45298	8.10773	8.22995	8.14357	8.04684	8.15538	7.87898	8.72092	8.36639	8.29733	8.42041	8.17481	7.91102
H1f0	ENSMUSG00000096210	ENSMUSG00000096210	0.446383	0.186798	0.435096	0.306319	0.507788	0.0848892	0.292428	0.764796		8.70198	8.54929	8.62171	8.27621	8.41562	8.31725	8.12598	8.09711	8.14754	7.97817	8.1523	8.41331	8.3825	7.98779	8.15482
Baz1a	ENSMUSG00000035021	ENSMUSG00000035021	0.0232961	0.991488	-0.206958	0.888255	0.0079942	0.994893	0.205429	0.93064		8.51879	8.56953	8.48668	8.34857	8.39251	8.21247	8.34468	8.49598	8.68774	8.77415	8.7617	8.64868	8.43694	8.64118	8.4099
Camkk2	ENSMUSG00000029471	ENSMUSG00000029471	0.0780848	0.961849	-0.160041	0.993883	-0.0125474	0.994893	0.050078	0.992218		8.44076	8.49209	8.36513	8.48018	8.34996	8.30274	8.27694	8.52841	8.51269	8.4821	8.53121	8.73775	8.08496	8.26911	8.65393
Acbd3	ENSMUSG00000026499	ENSMUSG00000026499	-0.0144365	0.995885	0.0094981	0.995681	-0.246662	0.754593	0.148962	0.980471		8.82994	8.93208	8.54382	8.66695	8.51739	8.68115	8.80529	9.24373	8.96667	8.90344	8.69859	8.67625	8.53619	9.06317	8.70713
Pdrg1	ENSMUSG00000027472	ENSMUSG00000027472	0.0578002	0.981805	0.0180895	0.995681	0.109369	0.953044	0.366887	0.781409		8.3338	8.61408	8.55709	8.12353	8.14954	8.16512	8.12598	8.56013	8.47922	8.54831	8.65271	8.24304	7.90652	8.68973	8.63445
Nisch	ENSMUSG00000021910	ENSMUSG00000021910	-0.0870896	0.942735	-0.135315	0.993883	-0.179089	0.796912	0.00596928	0.996997		8.48587	8.44355	8.60134	8.41105	8.51739	8.60434	8.63176	8.64392	8.80045	8.44397	8.72733	8.75596	8.6073	8.55021	8.65006
Cotl1	ENSMUSG00000031827	ENSMUSG00000031827	-0.542911	0.093716	-0.14784	0.995681	-0.577681	0.0587698	-0.309606	0.780388		8.44648	8.45992	7.92347	8.7042	8.50882	8.54393	8.8772	8.75086	8.93307	8.34809	8.50193	8.43607	8.57778	8.99582	8.85925
Nop53	ENSMUSG00000041560	ENSMUSG00000041560	0.169002	0.827613	0.0468621	0.995681	0.196497	0.735676	0.174493	0.95908		9.21191	9.30545	8.93614	8.86086	9.0268	9.0489	8.92519	8.95552	8.99063	9.21788	9.09144	9.00246	8.99277	9.07888	8.87262
Dusp6	ENSMUSG00000019960	ENSMUSG00000019960	0.814093	0.339495	0.310212	0.993883	0.58419	0.626416	0.468422	0.939045		7.66274	6.92842	8.23238	7.07262	7.53305	7.12036	7.32256	7.17548	6.89696	7.27736	7.3223	7.6039	7.34817	5.9671	7.10868
S100a13	ENSMUSG00000042312	ENSMUSG00000042312	0.0178693	0.993088	-0.174293	0.961528	0.0309441	0.988899	0.12298	0.982436		8.43502	8.26884	8.36513	8.31457	8.22995	8.15439	8.15142	8.37636	8.44061	8.40479	8.4454	8.714	8.27626	8.42472	8.31517
Atad2	ENSMUSG00000022360	ENSMUSG00000022360	-0.115329	0.900548	-0.157894	0.953495	-0.0153915	0.989147	0.0186282	0.993307		8.85164	8.68074	8.66159	8.6777	8.63231	8.82009	8.7397	8.74397	8.75222	8.81954	8.98704	8.84855	8.72977	8.78218	9.009
Litaf	ENSMUSG00000022500	ENSMUSG00000022500	0.16862	0.860904	0.0731016	0.995681	0.0126249	0.992383	0.0167274	0.993307		8.57206	8.39899	8.68838	8.35193	8.71659	8.56029	8.40092	8.62155	8.62025	8.42842	8.41038	8.62056	8.29905	8.336	8.54544
Gtf2h5	ENSMUSG00000034345	ENSMUSG00000034345	0.00767791	0.995885	-0.0369699	0.995681	0.0215532	0.988899	-0.188804	0.940635		8.59797	8.55944	8.50598	8.73281	8.70539	8.77875	8.45913	8.66595	8.45789	8.60472	8.4454	8.70063	8.67855	8.49274	8.45058
Ankhd1	ENSMUSG00000024483	ENSMUSG00000024483	-0.0545251	0.965879	-0.126113	0.993883	-0.105642	0.917466	0.0054069	0.9973		9.12904	9.19575	8.79085	8.95437	9.06237	9.08891	8.98302	9.16082	9.2778	9.20426	9.15863	9.13357	9.0822	9.11234	9.08848
Brd8	ENSMUSG00000003778	ENSMUSG00000003778	-0.118777	0.929012	-0.116406	0.995681	0.100757	0.944146	0.0498621	0.992218		8.88149	8.52875	8.40385	8.60077	8.49587	8.58848	8.41779	8.38081	8.71675	8.61848	8.7524	8.80425	8.4287	8.94244	8.77277
Stard7	ENSMUSG00000027367	ENSMUSG00000027367	-0.483171	0.290746	-0.139513	0.995681	-0.447434	0.345622	-0.117299	0.990293		8.26431	8.24386	8.03775	8.3686	8.24551	8.2683	8.53455	8.74397	8.58134	8.33565	8.14758	8.45211	8.21527	9.02314	8.62263
Setd7	ENSMUSG00000037111	ENSMUSG00000037111	0.0291235	0.995456	0.200312	0.995681	0.0145585	0.995994	-0.264549	0.9781		7.36974	7.52368	8.14715	7.88948	7.81611	8.23302	8.03048	7.70867	7.32204	7.45662	7.26247	7.82205	8.30806	7.27866	7.24855
Rab12	ENSMUSG00000023460	ENSMUSG00000023460	0.130925	0.903543	0.0936926	0.995681	0.0889246	0.944846	0.128868	0.980674		9.21861	9.20872	8.90947	9.00215	8.91773	9.03433	8.80529	9.19658	9.04883	9.13173	9.09144	8.82411	8.78892	9.03661	9.10839
Map7d1	ENSMUSG00000028849	ENSMUSG00000028849	0.200586	0.792798	0.132027	0.993883	0.25596	0.622289	0.101895	0.98912		8.46912	8.61894	8.55973	8.62317	8.4018	8.29299	8.28616	8.19127	8.40985	8.36043	8.5492	8.34622	8.39947	8.37469	8.28048
Cd24a	ENSMUSG00000047139	ENSMUSG00000047139	-0.218369	0.860904	-0.333639	0.82826	-0.455811	0.388922	-0.405786	0.746342		7.68225	7.69012	7.97186	8.43973	8.16599	7.92096	8.40516	7.86921	8.39646	7.88445	8.17566	8.27946	7.91834	7.94272	8.16028
Gatad2b	ENSMUSG00000042390	ENSMUSG00000042390	0.0192857	0.992303	0.0391348	0.995681	-0.024415	0.988899	0.0928555	0.98912		9.16761	9.18595	8.89281	9.00642	8.93062	9.02846	8.92814	9.09739	9.27292	8.98274	9.16331	8.97607	8.98436	9.05525	9.14466
Gm10073	ENSMUSG00000060019	ENSMUSG00000060019	0.331773	0.753981	0.426185	0.72441	0.455736	0.502232	0.308345	0.945247		9.60335	9.68997	8.64428	9.04011	9.16412	9.00475	8.87414	9.04511	8.84712	9.01171	8.91113	8.93785	9.33686	9.04995	8.68078
Rpl35	ENSMUSG00000062997	ENSMUSG00000062997	0.492212	0.104582	0.512927	0.0974994	0.446009	0.159579	0.637505	0.0149626		8.47472	8.57455	8.64924	7.83774	7.91022	8.07691	8.18137	7.9067	8.27979	8.11554	8.08974	7.98968	8.22482	7.87836	8.13277
Ezh2	ENSMUSG00000029687	ENSMUSG00000029687	-0.235325	0.721829	-0.240334	0.82826	-0.283682	0.552605	-0.11745	0.982436		8.85594	8.62379	8.42429	8.80071	8.7497	8.70342	8.72622	8.87269	9.12656	8.93679	8.83688	8.84855	8.81761	8.91353	8.87594
Cnot6	ENSMUSG00000020362	ENSMUSG00000020362	0.000492915	0.999682	-0.216922	0.92692	-0.0777017	0.961738	-0.142619	0.980471		7.93084	8.13937	8.24557	8.31457	8.13291	8.31725	8.17642	8.10788	8.2943	8.20947	8.157	8.58317	7.99292	8.08433	8.26536
Copz1	ENSMUSG00000060992	ENSMUSG00000060992	-0.0505201	0.975744	0.114331	0.995681	-0.0757724	0.956453	0.0848606	0.990293		8.71625	8.72203	8.69801	8.63975	8.71659	8.51904	8.70576	8.64021	8.99063	8.73678	8.37852	8.65423	8.72977	8.86302	8.68457
Ing1	ENSMUSG00000045969	ENSMUSG00000045969	0.0989626	0.949916	0.0044372	0.996579	0.0393485	0.988797	0.131903	0.984143		9.31549	9.15948	8.71232	8.88423	8.98724	8.96537	8.89839	9.10008	9.10477	8.95588	9.17495	9.07676	8.78247	9.2319	8.87925
Errfi1	ENSMUSG00000028967	ENSMUSG00000028967	0.551852	0.695245	0.0522546	0.995681	0.508846	0.69212	0.61978	0.746342		6.97026	7.09132	8.18869	6.94507	6.86854	7.00558	7.22048	7.28393	6.52283	7.74711	7.60982	7.03369	7.18158	6.65276	7.1311
Tmx1	ENSMUSG00000021072	ENSMUSG00000021072	0.0165601	0.995775	-0.0655705	0.995681	0.120297	0.93969	-0.00583642	0.997547		7.97106	8.12576	8.49774	8.09976	8.25066	8.34585	8.30895	7.95522	8.03686	8.27611	8.37044	8.22821	8.41207	8.18453	8.00506
Cwc15	ENSMUSG00000004096	ENSMUSG00000004096	0.107018	0.902328	-0.0533341	0.995681	-0.00586657	0.996129	0.0615681	0.990293		8.78102	8.76656	8.67383	8.59512	8.67507	8.76117	8.78267	8.79485	8.64687	8.73993	8.74305	8.87973	8.58522	8.61269	8.6959
Foxm1	ENSMUSG00000001517	ENSMUSG00000001517	-0.139285	0.929012	0.0703374	0.995681	0.1539	0.922007	-0.156752	0.98459		8.14985	8.12576	8.21238	8.42706	8.29619	8.22278	8.0737	8.28915	7.5885	7.91823	8.03459	8.30088	8.62544	8.16993	8.04103
Tspan9	ENSMUSG00000030352	ENSMUSG00000030352	-0.163466	0.903543	0.0164191	0.995681	-0.0584743	0.985028	0.134975	0.98912		8.14985	8.32946	8.47273	8.35862	8.02285	8.17578	8.24421	8.60263	8.28465	8.46697	8.50931	7.88957	8.52849	8.61629	8.30534
Ppp1r14b	ENSMUSG00000056612	ENSMUSG00000056612	-0.525195	0.587518	-0.319157	0.949588	-0.48745	0.585608	-0.321768	0.966979		7.57153	7.27515	8.09713	8.10375	8.01076	7.92728	8.43032	7.81766	8.22531	8.20035	7.93407	7.88957	8.36533	7.52022	8.57026
Cited2	ENSMUSG00000039910	ENSMUSG00000039910	0.0883107	0.959224	-0.0212503	0.995681	0.146397	0.915628	0.147102	0.982436		8.26431	8.19907	8.46712	8.30421	8.10475	8.09947	8.19122	8.04202	8.28465	8.42451	8.27418	8.32198	8.06914	7.95412	8.5987
Cd34	ENSMUSG00000016494	ENSMUSG00000016494	0.211937	0.879839	0.324891	0.872424	0.234739	0.840213	0.149929	0.98912		9.35857	9.37036	8.70518	8.96975	9.14489	8.94371	8.86495	9.13999	8.78341	9.04776	8.7617	8.714	9.23891	9.06317	8.46829
Diaph1	ENSMUSG00000024456	ENSMUSG00000024456	0.179888	0.83728	-0.0717625	0.995681	0.114272	0.921632	0.194201	0.95908		8.35219	8.09117	8.46148	8.12353	8.16053	8.09387	8.15142	8.176	8.28465	8.18655	8.47582	8.48055	8.14657	8.13028	8.14383
Plod3	ENSMUSG00000004846	ENSMUSG00000004846	-0.202511	0.741211	-0.163096	0.948486	-0.184465	0.767488	-0.0688767	0.990293		8.64843	8.59445	8.58588	8.63975	8.58417	8.79957	8.84637	8.90084	8.60868	8.84903	8.72099	8.73775	8.89743	8.7661	8.75844
Map4	ENSMUSG00000032479	ENSMUSG00000032479	-0.122197	0.894787	0.122974	0.993883	0.0709455	0.956453	-0.0280089	0.993165		8.66814	8.53905	8.6908	8.66426	8.66353	8.66611	8.66394	8.4586	8.56946	8.54471	8.5492	8.45211	8.88844	8.54645	8.81839
Bcl9l	ENSMUSG00000063382	ENSMUSG00000063382	-0.208729	0.86831	-0.0761668	0.995681	-0.392275	0.541581	-0.255354	0.964166		8.92308	8.77093	8.1116	8.92987	8.75696	8.95922	8.92814	8.87585	9.23332	8.56262	8.92498	8.60916	8.62183	8.84476	9.02405
1110004F10Rik	ENSMUSG00000030663	ENSMUSG00000030663	-0.16189	0.918562	0.140235	0.995681	-0.137276	0.93969	0.241962	0.967914		8.82556	8.85993	8.22575	8.5432	8.46961	8.21764	8.74973	8.75086	8.87634	8.68866	8.44923	8.40344	8.48145	9.2482	8.5987
Polr1d	ENSMUSG00000029642	ENSMUSG00000029642	0.372788	0.760487	0.54293	0.603706	0.4051	0.69212	0.33798	0.95908		7.55046	7.40476	8.34077	7.51733	7.63895	7.36347	7.64981	7.41112	7.24447	7.50187	7.10591	7.29791	7.72994	7.09518	7.53581
Uhrf1bp1l	ENSMUSG00000019951	ENSMUSG00000019951	0.0205601	0.995821	-0.108007	0.995681	0.0571022	0.986744	0.0964217	0.990293		7.47416	7.65265	8.3621	7.63222	7.98009	7.78836	7.75977	7.88182	7.88538	7.9835	7.88389	8.13589	7.80191	7.58031	8.19261
Caprin1	ENSMUSG00000027184	ENSMUSG00000027184	0.158949	0.842331	0.205217	0.887987	0.0986493	0.932952	0.270995	0.746342		8.82556	9.10156	8.89071	8.61481	8.72031	8.68861	8.93108	8.83105	8.76616	8.85194	8.81026	8.5418	8.75306	8.88998	8.7034
Cuta	ENSMUSG00000024194	ENSMUSG00000024194	-0.221626	0.751067	0.0931365	0.995681	-0.0408237	0.985028	-0.133135	0.977376		8.56156	8.5895	8.54648	8.70945	8.5428	8.82349	8.58023	8.72311	8.50439	8.29766	8.66267	8.43607	8.89444	8.81381	8.63052
Prps1	ENSMUSG00000031432	ENSMUSG00000031432	0.00715528	0.995885	-0.0760847	0.995681	-0.00789086	0.996156	-0.013683	0.994176		8.35219	8.37618	8.46148	8.44917	8.3355	8.45048	8.31796	8.56013	8.33229	8.64562	8.35825	8.40674	8.41207	8.65871	8.03509
Dot1l	ENSMUSG00000061589	ENSMUSG00000061589	-0.0181811	0.995885	-0.207851	0.993883	-0.0211873	0.989792	0.091165	0.990293		7.57153	7.48157	8.33152	7.75394	7.91022	7.65762	7.93993	7.94925	7.76554	7.98881	8.23913	7.97199	7.91244	8.04222	7.67202
Tmem109	ENSMUSG00000034659	ENSMUSG00000034659	0.0353486	0.991157	-0.0358658	0.995681	0.0701647	0.968258	-0.0792618	0.990293		8.21827	8.53905	8.40679	8.41748	8.59636	8.40138	8.30895	8.33112	8.33697	8.07618	8.4908	8.657	8.45734	8.28725	8.32978
Dnajc8	ENSMUSG00000054405	ENSMUSG00000054405	0.00984835	0.995885	-0.0636778	0.995681	-0.118049	0.916397	0.164764	0.967914		9.04864	8.95149	8.65913	8.74818	8.74241	8.68115	8.93401	8.91624	9.15333	8.89781	9.10123	8.8437	8.77598	9.0526	8.78696
Tbl1x	ENSMUSG00000025246	ENSMUSG00000025246	-0.426865	0.10176	-0.2069	0.878392	-0.355257	0.247343	-0.182451	0.957909		8.72097	8.36464	8.40385	8.7558	8.6004	8.67365	8.76629	8.86001	8.92377	8.72092	8.78315	8.6063	8.86725	8.951	8.94716
Spg21	ENSMUSG00000032388	ENSMUSG00000032388	0.0919111	0.956186	0.0109511	0.995681	-0.0237581	0.989047	0.0423012	0.992218		8.33996	7.94384	8.50598	8.262	8.17685	8.30274	8.15645	8.33571	8.43625	8.03059	8.51664	8.2504	8.22957	8.03687	8.32005
BC031181	ENSMUSG00000036299	ENSMUSG00000036299	-0.502165	0.277864	-0.429305	0.577775	-0.55346	0.155023	-0.287494	0.925538		7.7205	7.72664	7.83467	8.20003	7.99244	7.92728	8.49932	8.06983	8.3276	8.07119	8.01918	8.4296	7.98731	8.55771	8.17114
Zrsr2	ENSMUSG00000031370	ENSMUSG00000031370	-0.146692	0.915114	-0.0267692	0.995681	-0.139258	0.931389	0.184937	0.970517		8.37635	8.21201	8.39205	8.31457	7.98009	8.12169	8.40516	8.35392	8.63172	8.44397	8.36639	8.25772	7.99292	8.79808	8.52442
Larp4b	ENSMUSG00000033499	ENSMUSG00000033499	0.173985	0.836523	0.179121	0.948486	0.0395657	0.985028	0.121287	0.980674		8.50243	8.34128	8.65172	8.41427	8.44736	8.3076	8.49137	8.46699	8.45789	8.49335	8.25237	8.24672	8.20082	8.46113	8.34424
Itm2c	ENSMUSG00000026223	ENSMUSG00000026223	-0.030633	0.995456	-0.106405	0.995681	-0.0484942	0.988899	-0.294019	0.967914		7.64297	7.31167	7.96789	8.06337	7.80915	7.99504	8.01947	7.62116	7.45712	7.66328	7.62347	8.00716	8.30356	6.66669	7.69477
Rps10-ps3	ENSMUSG00000082991	ENSMUSG00000082991	-0.286253	0.681503	0.0958896	0.995681	-0.136843	0.911531	-0.161733	0.967914		8.47472	8.44903	8.44729	8.57515	8.65579	8.62004	8.63176	8.69124	8.44061	8.54831	8.1381	8.37006	8.87637	8.88701	8.4007
Ccn1	ENSMUSG00000028195	ENSMUSG00000028195	-0.167475	0.915114	0.2942	0.922293	0.0860998	0.968258	0.0455124	0.993165		8.7628	8.37043	8.42429	8.45542	8.39716	8.58848	8.59514	8.13446	8.55347	8.28477	8.04477	8.35989	8.83331	8.08951	9.00597
Dlc1	ENSMUSG00000031523	ENSMUSG00000031523	-0.0667232	0.979617	-0.0906606	0.995681	-0.0353421	0.988899	-0.0770703	0.992218		7.63298	7.91248	8.34689	8.05926	8.43384	7.65	8.15142	7.88808	8.07096	7.90144	8.17102	8.19428	7.91244	8.05287	8.23463
Lbp	ENSMUSG00000016024	ENSMUSG00000016024	-0.168262	0.911432	-0.444339	0.607732	-0.367295	0.633986	-0.460045	0.662709		8.02553	7.78841	7.6782	8.13915	8.46075	8.24319	7.94576	8.24104	8.36473	7.78422	8.26984	8.62623	8.03696	8.06343	7.88487
Fbln5	ENSMUSG00000021186	ENSMUSG00000021186	-0.290235	0.558351	-0.189764	0.922954	-0.302531	0.448567	-0.58453	0.00850709		8.08537	8.31154	8.00324	8.72506	8.6519	8.74694	8.34026	8.44592	8.50023	8.19117	8.31261	8.43607	8.42456	8.38736	8.44163
Gm13935	ENSMUSG00000083320	ENSMUSG00000083320	-0.190101	0.91046	-0.0344017	0.995681	-0.0614195	0.985028	-0.328145	0.944108		8.45784	8.71295	8.01484	8.52547	8.80675	8.87344	8.47534	8.76113	8.12607	8.48961	8.38254	8.47742	8.91524	8.74984	7.98674
Surf4	ENSMUSG00000014867	ENSMUSG00000014867	-0.106606	0.934467	-0.0758662	0.995681	-0.184039	0.840213	-0.209871	0.95908		8.83866	8.63344	8.58588	8.72506	8.90146	9.046	8.92814	8.73705	8.93307	8.66233	8.79224	8.82411	8.94444	8.43289	8.944
Arhgap1	ENSMUSG00000027247	ENSMUSG00000027247	0.0254395	0.992303	0.147659	0.995681	-0.0878127	0.956453	-0.233139	0.948025		8.10719	8.34716	8.39205	8.51952	8.47402	8.57244	8.59514	8.43313	8.05401	8.16327	8.03459	8.23193	8.46542	8.07392	8.23463
Hexa	ENSMUSG00000025232	ENSMUSG00000025232	-0.662086	0.0200437	-0.407153	0.535456	-0.347778	0.534734	-0.374945	0.683954		8.17072	7.98964	7.86488	8.50753	8.12171	8.46359	8.48738	8.18111	8.36473	8.49708	8.36639	8.35989	8.62544	8.40408	8.91199
Gm12732	ENSMUSG00000082646	ENSMUSG00000082646	-0.253888	0.843611	-0.0722728	0.995681	-0.223268	0.867461	-0.0978142	0.990293		8.06322	8.21844	8.278	8.1661	8.33064	8.3646	8.5268	8.69838	7.89175	8.49335	8.03969	8.22074	8.63264	8.62344	7.97439
Gtf2i	ENSMUSG00000060261	ENSMUSG00000060261	-0.289869	0.690373	0.0111351	0.995681	-0.19094	0.836711	-0.117111	0.98912		8.05576	8.38763	8.353	8.48018	8.4563	8.22278	8.45505	8.47949	8.46218	8.34809	8.02947	8.39018	8.58892	8.7531	8.31026
Naa15	ENSMUSG00000063273	ENSMUSG00000063273	-0.0364249	0.991488	-0.174922	0.993883	0.0277165	0.988899	0.033885	0.993307		8.13577	8.01939	8.44443	8.1469	8.24035	8.17046	8.19122	7.9671	8.38747	8.54111	8.47206	8.13589	8.0797	8.0315	8.59063
Polr1a	ENSMUSG00000049553	ENSMUSG00000049553	-0.150722	0.862739	-0.106655	0.995681	-0.233633	0.660305	-0.0257091	0.993307		8.59797	8.52357	8.60901	8.60077	8.56363	8.64709	8.99431	8.69838	8.71675	8.81954	8.74618	8.47113	8.74312	8.73669	8.7034
Ctsh	ENSMUSG00000032359	ENSMUSG00000032359	-0.261835	0.807196	-0.43386	0.577775	-0.44998	0.376131	-0.387276	0.746342		7.60258	7.7085	7.86488	8.12353	8.08182	8.14357	8.29532	7.90052	8.30389	7.80844	8.03459	8.53579	7.97038	8.00981	7.99898
Cdk2ap1	ENSMUSG00000029394	ENSMUSG00000029394	-0.534934	0.0912451	-0.36516	0.584847	-0.461365	0.183352	-0.354366	0.684646		7.88948	8.0771	7.99936	8.48018	8.44287	8.05399	8.59514	8.42454	8.30389	8.4821	8.22576	8.33588	8.55902	8.65173	8.32492
Sec61b	ENSMUSG00000053317	ENSMUSG00000053317	0.136521	0.961849	0.0758918	0.995681	-0.0625992	0.988899	-0.0635658	0.993165		7.34547	7.68084	8.21574	7.78904	7.80215	7.99504	7.90446	7.74362	7.9356	7.49443	7.64372	7.99407	8.13648	6.69414	7.81735
Heg1	ENSMUSG00000075254	ENSMUSG00000075254	-0.344341	0.701878	-0.411802	0.656559	-0.538111	0.224775	-0.619981	0.18509		7.74853	7.64313	7.60849	8.30421	8.29121	8.22791	8.02498	8.24592	8.29911	7.64323	7.92858	8.49301	7.85823	8.08951	8.05282
Timp3	ENSMUSG00000020044	ENSMUSG00000020044	0.24791	0.835614	-0.00309737	0.998539	0.23134	0.840213	0.0896817	0.990293		7.66274	8.06288	8.38908	7.91693	8.13847	7.91461	7.93408	7.58308	8.00781	7.92378	8.24355	8.06672	7.93007	7.61664	7.94306
Avpi1	ENSMUSG00000018821	ENSMUSG00000018821	-0.248038	0.725411	0.137865	0.995681	0.0159806	0.989792	0.0963901	0.990293		9.0784	8.93598	8.6039	8.79332	8.75696	8.79612	8.98018	8.84399	8.75222	8.91185	8.68888	8.60916	9.069	9.32265	8.95347
Gm49218	ENSMUSG00000115746	ENSMUSG00000115746	-0.191258	0.965879	0.068809	0.995681	-0.00831527	0.999106	-0.0626399	0.993307		6.69095	6.95944	8.05657	7.51733	7.15881	7.58752	7.93408	7.2744	6.64861	7.56009	7.05643	7.25466	8.08496	6.97721	7.39469
Cd164	ENSMUSG00000019818	ENSMUSG00000019818	0.0533509	0.991075	-0.0354022	0.995681	-0.00515572	0.999106	-0.255077	0.967914		7.30829	7.53402	8.26511	7.93942	8.13291	8.01891	7.93993	7.72275	7.67973	7.86149	7.53954	8.00281	7.91244	7.40864	7.81735
Prnp	ENSMUSG00000079037	ENSMUSG00000079037	0.246711	0.73305	0.155256	0.993883	0.192431	0.824172	0.0366263	0.992218		8.47472	8.6714	8.57287	8.47094	8.55533	8.59246	8.5229	8.03074	8.5454	8.26303	8.45306	8.53277	8.27166	8.34901	8.37275
Mia3	ENSMUSG00000056050	ENSMUSG00000056050	-0.184564	0.872665	-0.242699	0.922293	-0.223291	0.816705	-0.394469	0.656049		7.9631	8.02673	8.19889	8.46785	8.53015	8.38311	8.44274	7.9067	8.46218	8.34396	8.17566	8.40344	8.23903	8.0315	8.46389
Ldlrap1	ENSMUSG00000037295	ENSMUSG00000037295	0.0421089	0.991488	0.139632	0.995681	-0.0720958	0.984334	0.130868	0.990293		9.23521	9.09459	8.32222	8.81294	8.71659	8.86359	8.54611	9.12681	9.23833	8.83436	8.76478	8.77138	8.76947	9.21067	8.61071
Gpbp1	ENSMUSG00000032745	ENSMUSG00000032745	0.134179	0.943027	-0.0481529	0.995681	0.123591	0.946219	-0.03287	0.993307		7.61278	7.73563	8.24557	8.0837	7.92318	7.7814	8.02498	7.89431	7.3408	8.00985	7.79014	8.0415	7.96469	7.65207	7.67964
Polr2g	ENSMUSG00000071662	ENSMUSG00000071662	0.0474098	0.991488	-0.0948475	0.995681	0.0642358	0.986683	-0.0555993	0.993165		7.49637	7.23768	8.26188	7.91693	7.79512	7.68771	7.80536	7.72275	7.51608	8.04084	7.97725	7.44624	7.9985	7.4169	7.63327
C1ra	ENSMUSG00000055172	ENSMUSG00000055172	0.169871	0.908642	-0.141755	0.995681	0.142027	0.93969	-0.0126971	0.995331		8.25782	8.20556	8.00324	8.11169	8.32088	8.05975	7.98025	7.83721	8.20498	7.79031	8.30839	8.65146	7.77615	8.07392	8.09335
Atic	ENSMUSG00000026192	ENSMUSG00000026192	0.184047	0.918562	0.272062	0.982069	0.316576	0.796821	0.152612	0.989259		7.79407	7.78841	8.34995	7.86619	7.80215	7.91461	7.786	7.8501	7.4311	7.84402	7.87821	7.48419	8.30806	7.34944	7.66435
Tmem43	ENSMUSG00000030095	ENSMUSG00000030095	0.231305	0.929012	0.376551	0.984013	0.155084	0.961738	0.0685346	0.993165		6.93816	6.89672	8.20565	7.29121	7.44595	7.55523	7.58406	7.21586	7.21427	7.19708	6.96286	7.2251	7.6184	6.40946	7.51891
Chd3	ENSMUSG00000018474	ENSMUSG00000018474	0.023508	0.992739	0.107284	0.995681	0.0528538	0.985028	0.0830681	0.990293		9.30609	9.43248	8.77956	9.03594	9.25403	9.02846	8.90439	9.32213	9.16127	9.03499	9.044	9.17089	9.17874	9.27117	9.04487
Srsf10	ENSMUSG00000028676	ENSMUSG00000028676	0.0814872	0.949762	0.110618	0.995681	0.0475745	0.980748	0.143353	0.967914		8.65339	8.69464	8.71706	8.58944	8.63625	8.40592	8.59885	8.8015	8.51269	8.64898	8.68237	8.40014	8.6073	8.64471	8.57436
Ccdc34	ENSMUSG00000027160	ENSMUSG00000027160	-0.238213	0.836523	-0.416943	0.604898	-0.184262	0.887918	0.0253709	0.993307		7.95511	7.69012	7.89028	7.94832	7.77382	7.73892	7.96311	7.973	8.15286	8.05103	8.11895	8.55374	7.70967	8.1353	8.34424
Lamtor4	ENSMUSG00000050552	ENSMUSG00000050552	-0.456731	0.189336	-0.13362	0.995681	-0.531205	0.0739551	-0.179076	0.967914		8.40598	8.44903	8.24884	8.36195	8.58009	8.67741	8.93986	8.87269	8.86018	8.53749	8.42214	8.52975	8.48145	9.06054	8.85252
Gas5	ENSMUSG00000053332	ENSMUSG00000053332	0.369331	0.301549	0.287052	0.680868	0.421624	0.150489	0.354054	0.512758		9.10755	9.13591	8.83075	8.49847	8.73875	8.77875	8.69541	8.63278	8.48344	8.72092	8.7801	8.71931	8.78892	8.68973	8.47707
Ndufa1	ENSMUSG00000016427	ENSMUSG00000016427	0.292247	0.943939	0.311625	0.995681	0.369695	0.917466	0.0522122	0.993307		7.00166	6.79721	8.11519	7.481	7.27455	7.39117	7.29543	6.77706	7.10878	6.91426	7.1817	7.27645	7.53639	5.84993	7.51891
Csnk1d	ENSMUSG00000025162	ENSMUSG00000025162	-0.125046	0.908642	0.0500974	0.995681	-0.107184	0.93837	-0.116613	0.98912		8.35219	8.63824	8.5196	8.55199	8.69409	8.62782	8.70576	8.74397	8.36473	8.45551	8.29139	8.60916	8.62183	8.75962	8.50309
Hipk1	ENSMUSG00000008730	ENSMUSG00000008730	0.010384	0.995885	-0.168181	0.995681	0.00424798	0.999106	-0.0864347	0.990293		7.69191	7.73563	8.34995	7.87088	7.99244	8.29299	8.16647	7.8242	7.8981	8.1058	8.09465	8.21699	8.03153	7.94272	7.91749
Hspa1b	ENSMUSG00000090877	ENSMUSG00000090877	1.31381	0.712766	1.21501	0.86622	1.17542	0.716332	1.10625	0.939453		4.98132	5.04964	7.92757	5.58623	5.94277	5.36606	5.96925	5.39095	5.30743	5.12045	5.39512	5.99185	5.3755	4.82776	5.96258
Sec13	ENSMUSG00000030298	ENSMUSG00000030298	0.157048	0.977453	-0.089978	0.995681	-0.095053	0.988899	-0.125491	0.992218		6.63197	6.65286	8.04531	7.40547	7.44595	7.36347	7.44284	7.2934	7.38665	7.07263	7.1909	7.7512	7.56675	5.9671	7.39469
Atxn7l3	ENSMUSG00000059995	ENSMUSG00000059995	-0.206744	0.835561	-0.0896521	0.995681	-0.221004	0.795229	-0.00517431	0.997635		8.61329	8.94376	8.43007	8.78341	8.76777	8.45048	8.69541	8.91624	9.04025	8.89216	8.73992	8.6403	8.77598	9.03661	8.80101
Nop2	ENSMUSG00000038279	ENSMUSG00000038279	0.271475	0.771803	0.0586884	0.995681	0.229009	0.822717	0.287847	0.920649		8.23818	8.45448	8.49498	8.1963	8.16599	7.98295	8.12598	8.25564	8.14754	8.62532	8.41431	7.91757	8.0797	7.96544	8.33944
Cd248	ENSMUSG00000056481	ENSMUSG00000056481	-0.423899	0.752943	-0.0102656	0.995681	-0.552668	0.540412	-0.235836	0.980674		8.38232	7.64313	7.32159	8.14303	7.78095	8.25831	8.29075	8.22134	8.62025	7.42564	7.56098	8.37343	7.96469	8.48097	8.29048
Usp1	ENSMUSG00000028560	ENSMUSG00000028560	-0.0104325	0.995885	0.0104141	0.995681	0.165582	0.868184	0.130451	0.9826		8.62846	8.54418	8.48945	8.58659	8.42931	8.22278	8.1311	8.36294	8.63172	8.55906	8.64269	8.41985	8.39101	8.71004	8.57026
Tmem147	ENSMUSG00000006315	ENSMUSG00000006315	-0.138898	0.894787	0.168007	0.98619	-0.0492219	0.983378	0.0914686	0.990293		9.10394	9.11884	8.81094	8.82989	8.98724	8.94683	9.2203	9.05349	8.88914	9.04266	8.75551	8.71931	9.09788	9.31824	9.01504
Ppme1	ENSMUSG00000030718	ENSMUSG00000030718	0.23578	0.789641	0.0344868	0.995681	0.117128	0.937415	-0.0590004	0.992218		8.21158	8.38763	8.31911	8.56362	8.4018	8.08258	8.27694	8.15018	8.14754	8.44397	8.26113	8.10375	8.24843	7.99885	7.96194
Mapk1	ENSMUSG00000063358	ENSMUSG00000063358	0.103616	0.963295	-0.087536	0.995681	-0.0667906	0.985028	0.0392553	0.993307		7.46293	7.69934	8.33152	7.68641	8.05852	7.80218	7.7263	7.83721	8.26022	7.8958	7.99311	8.04573	7.63998	7.53548	8.13277
Cemip2	ENSMUSG00000024754	ENSMUSG00000024754	-0.102855	0.961849	-0.196905	0.995681	-0.240977	0.84798	-0.272938	0.966979		7.40539	7.53402	8.23899	8.02182	7.89715	8.24319	8.22036	7.70158	8.11522	7.80844	8.014	8.11589	7.85208	7.73372	8.07612
Ctdsp2	ENSMUSG00000078429	ENSMUSG00000078429	-0.131679	0.951761	0.0722665	0.995681	-0.0300619	0.989047	-0.361026	0.899527		7.41709	7.78841	8.07145	8.24043	8.07022	8.12719	7.96884	7.77099	7.71611	7.45662	7.58909	8.04573	8.25776	7.43329	7.96194
Samm50	ENSMUSG00000022437	ENSMUSG00000022437	-0.103241	0.918562	0.0541125	0.995681	0.110579	0.915919	0.186667	0.954086		8.56156	8.69924	8.63178	8.31457	8.6004	8.42391	8.58771	8.60643	8.36014	8.53749	8.51298	8.67625	8.78247	8.77255	8.64227
Polr2m	ENSMUSG00000032199	ENSMUSG00000032199	-0.0570394	0.982058	0.108317	0.995681	0.0822531	0.968258	-0.00932691	0.996997		7.86408	7.83933	8.39205	8.13136	8.09333	8.00104	7.84333	7.98474	8.12066	7.75337	8.04477	8.06255	8.23903	7.74032	8.32978
Nras	ENSMUSG00000027852	ENSMUSG00000027852	0.39765	0.505332	0.22809	0.948161	0.24844	0.782161	0.362137	0.746342		7.92267	7.92825	8.43583	7.7741	7.78805	7.76031	7.86194	8.07533	7.69439	7.94579	7.93954	7.83189	7.90652	7.73372	7.55252
Dync1li1	ENSMUSG00000032435	ENSMUSG00000032435	0.110417	0.956106	0.115426	0.995681	0.363748	0.651017	-0.107208	0.990293		7.57153	7.99714	8.33461	7.9877	8.2862	8.07121	7.77294	7.66558	7.51608	7.94032	7.97192	7.78199	8.25776	7.67292	7.70228
Plxnb2	ENSMUSG00000036606	ENSMUSG00000036606	-0.4884	0.207662	-0.161311	0.993883	-0.18541	0.856684	-0.346089	0.746342		8.55099	8.40464	8.14715	8.61761	8.68651	8.82687	8.82123	8.54832	8.22531	8.59082	8.43382	8.55671	8.88844	8.62701	9.01805
Prpf8	ENSMUSG00000020850	ENSMUSG00000020850	0.169222	0.919182	0.155792	0.995681	0.108387	0.959191	-0.091173	0.990293		7.47416	7.75344	8.26188	8.05515	7.98009	7.86937	7.76637	8.01938	7.4911	7.68307	7.61666	7.8706	8.02608	7.57294	7.4845
Ppp1r18	ENSMUSG00000034595	ENSMUSG00000034595	0.237396	0.778106	0.317711	0.71667	0.0651022	0.968817	0.0935394	0.990293		8.07064	8.29947	8.55709	8.25126	8.19299	8.27823	8.19612	8.38524	8.22026	8.01506	8.19408	7.83678	8.05849	8.00434	8.22945
Gm10076	ENSMUSG00000060143	ENSMUSG00000060143	0.333565	0.651889	0.26924	0.887573	0.208479	0.831788	0.408921	0.621735		8.75822	8.96684	8.67627	8.37851	8.37376	8.44168	8.35348	8.64392	8.76269	8.3686	8.67255	8.55076	8.19597	8.32726	8.82183
Tanc1	ENSMUSG00000035168	ENSMUSG00000035168	0.0583686	0.977453	0.0356094	0.995681	0.0257013	0.988899	-0.0695697	0.990293		7.85551	7.94384	8.31599	8.35862	7.8368	8.14357	8.10529	7.87553	8.12607	8.02025	8.05489	8.01582	8.00959	8.0207	7.99287
Fam126a	ENSMUSG00000028995	ENSMUSG00000028995	0.00971001	0.995885	-0.353185	0.764515	-0.260022	0.783347	-0.139039	0.98912		7.88948	7.81409	8.21574	8.11959	8.17143	8.09947	8.1413	8.00792	8.5454	8.30619	8.53121	8.16732	7.67525	8.1403	8.09335
Nckap1	ENSMUSG00000027002	ENSMUSG00000027002	-0.0284716	0.991488	-0.011063	0.995681	-0.143807	0.870639	-0.0242539	0.993307		8.58248	8.27502	8.53847	8.47094	8.63625	8.3785	8.685	8.5244	8.63552	8.42842	8.4454	8.57441	8.44104	8.66219	8.38679
Sdcbp	ENSMUSG00000028249	ENSMUSG00000028249	0.228972	0.875473	0.244555	0.986701	0.134873	0.944146	-0.0647441	0.992218		7.99466	7.68084	8.39796	7.94388	8.21423	8.21764	7.786	8.19127	7.77936	7.89014	7.70922	7.86582	8.05314	7.35804	8.01112
Trpc4ap	ENSMUSG00000038324	ENSMUSG00000038324	-0.0783137	0.979617	0.0417046	0.995681	-0.0153877	0.994893	-0.109477	0.990293		7.42868	7.61418	8.12949	7.9877	7.6929	7.92096	8.21554	7.47907	7.52431	7.60916	7.55387	7.97199	8.22005	7.52787	7.68723
Ebna1bp2	ENSMUSG00000028729	ENSMUSG00000028729	0.476792	0.646328	0.257418	0.993883	0.550724	0.448134	0.204369	0.982436		7.09195	7.43818	8.19889	7.68108	7.30457	7.39117	7.22048	7.13393	7.04157	7.51665	7.41943	7.31906	7.30379	6.89678	7.37604
Mthfd1l	ENSMUSG00000040675	ENSMUSG00000040675	-0.0181426	0.993753	0.245933	0.867693	0.103648	0.93969	-0.036183	0.992218		8.67302	8.92424	8.56763	8.84427	8.56776	8.84701	8.77287	8.4628	8.61255	8.40479	8.68563	8.33242	8.84884	8.67603	8.6959
Zmynd8	ENSMUSG00000039671	ENSMUSG00000039671	0.0295992	0.990876	0.0978693	0.995681	0.0544176	0.968258	0.155949	0.966979		9.24836	9.22157	8.90947	8.97411	8.94974	8.98973	9.12848	9.02252	9.06302	9.01951	9.13022	8.93328	9.09006	9.18429	9.009
Smim14	ENSMUSG00000037822	ENSMUSG00000037822	0.169795	0.915114	0.107839	0.995681	0.104772	0.959191	0.00219963	0.998729		7.8119	8.09816	8.32222	8.05926	8.23516	7.98901	8.22516	8.01366	7.70167	7.97283	7.78408	8.19046	8.24843	7.48921	7.96194
Igf2bp2	ENSMUSG00000033581	ENSMUSG00000033581	-0.019244	0.995596	0.0367567	0.995681	-0.168433	0.91226	0.211786	0.967914		8.45217	8.46533	8.33152	8.22952	8.08759	8.29299	8.31796	8.71609	8.6804	8.36452	8.35825	8.41331	7.91834	8.87507	8.34903
Ndufv3	ENSMUSG00000024038	ENSMUSG00000024038	-0.445687	0.269955	-0.098827	0.995681	-0.344616	0.513202	-0.012587	0.994837		8.35827	8.41026	8.1955	8.22952	8.39251	8.37388	8.76958	8.58347	8.62025	8.43232	8.25237	8.54778	8.39101	9.02314	8.79751
Cdc25b	ENSMUSG00000027330	ENSMUSG00000027330	-0.132416	0.903694	-0.0554063	0.995681	-0.0318131	0.988899	-0.00511249	0.997547		8.7628	8.5895	8.37715	8.60077	8.58825	8.55622	8.49535	8.61401	8.70956	8.48961	8.54203	8.83394	8.66457	8.88404	8.55376
Sugt1	ENSMUSG00000022024	ENSMUSG00000022024	0.0846023	0.959886	0.029691	0.995681	0.235611	0.782947	0.129631	0.98912		8.66814	8.83923	8.39205	8.54906	8.51739	8.45923	8.53455	8.49187	8.15816	8.72092	8.39055	8.68985	8.71628	8.63057	8.27546
Herc2	ENSMUSG00000030451	ENSMUSG00000030451	-0.0961306	0.951127	-0.113092	0.995681	-0.0785968	0.960819	0.125038	0.98912		8.68274	8.85169	8.37715	8.44288	8.4563	8.65092	8.50327	8.75086	8.88276	8.77415	8.53482	8.92411	8.62183	8.83555	8.7476
Fam193a	ENSMUSG00000037210	ENSMUSG00000037210	-0.346213	0.695561	0.00491763	0.996818	-0.100345	0.956507	0.0412667	0.993165		8.75361	8.65255	8.05283	8.62872	8.31598	8.43282	8.38385	8.49187	8.8955	8.47834	8.42605	8.59767	8.57778	9.02314	8.91522
Cdca4	ENSMUSG00000047832	ENSMUSG00000047832	-0.15753	0.918562	-0.146036	0.995681	0.032217	0.988899	-0.0713402	0.992218		7.36974	7.72664	8.25211	8.08773	7.78095	7.85618	7.71951	7.79784	7.92321	7.91266	8.0749	7.98087	8.18133	7.83585	7.96818
Qk	ENSMUSG00000062078	ENSMUSG00000062078	-0.11612	0.915114	-0.229553	0.866301	-0.147045	0.871275	-0.166649	0.967914		8.27077	8.26884	8.4643	8.37851	8.57599	8.57244	8.58771	8.61023	8.24038	8.66896	8.54562	8.4961	8.37394	8.48883	8.51166
Dnmt1	ENSMUSG00000004099	ENSMUSG00000004099	-0.273478	0.651889	-0.248401	0.827087	-0.108935	0.92887	-0.000714342	0.999042		8.37034	8.2564	8.40385	8.28677	8.35953	8.40138	8.33138	8.27965	8.71675	8.6219	8.58104	8.57733	8.50124	8.65173	8.6959
Rab8a	ENSMUSG00000003037	ENSMUSG00000003037	0.0462627	0.976231	0.0703934	0.995681	0.0295918	0.988899	0.0419125	0.992218		8.97145	9.13251	8.83947	8.82989	9.1028	8.87671	8.88935	9.00534	8.95759	8.93953	8.91391	8.87973	8.93575	9.0658	8.78696
Coro1c	ENSMUSG00000004530	ENSMUSG00000004530	-0.0768388	0.965396	-0.0109245	0.995681	-0.0919873	0.956453	0.0460387	0.992218		8.6972	8.80549	8.34077	8.66426	8.48717	8.56435	8.42198	8.95552	8.70956	8.65233	8.55634	8.68171	8.66808	8.95384	8.41447
Ltbp2	ENSMUSG00000002020	ENSMUSG00000002020	-0.35377	0.733122	-0.507599	0.570432	-0.315804	0.770902	-0.223396	0.967914		7.84689	8.05572	7.54594	7.91693	8.07022	8.13813	8.08959	7.91899	8.36014	8.05609	8.29566	8.56853	7.65419	8.53511	8.19261
Prpf4b	ENSMUSG00000021413	ENSMUSG00000021413	-0.186142	0.849382	-0.253195	0.868545	-0.0413937	0.986683	0.0376659	0.992218		8.85594	8.65728	8.44443	8.49543	8.70913	8.64709	8.45505	8.6513	8.94231	9.00124	9.0158	8.68171	8.83954	8.85392	8.82528
Rpl19-ps9	ENSMUSG00000108813	ENSMUSG00000108813	-0.247649	0.904898	0.0722234	0.995681	0.0558109	0.988899	-0.0959464	0.992218		7.4516	7.46004	7.99546	7.81846	7.62315	7.82944	8.06837	7.65827	6.85843	7.70903	7.22713	7.78706	8.3825	7.82968	7.31859
Pebp1	ENSMUSG00000032959	ENSMUSG00000032959	0.216952	0.843611	0.217859	0.97157	0.271311	0.749506	0.183203	0.967914		9.29979	8.98956	8.64924	8.84665	8.75333	8.84368	8.39667	9.01967	8.70232	8.89499	8.77093	8.67078	8.66106	8.99582	8.66165
Rbm27	ENSMUSG00000024491	ENSMUSG00000024491	-0.0701569	0.965879	-0.251461	0.896556	-0.086937	0.956507	0.0206125	0.993307		8.36432	8.20556	8.38313	8.17371	8.42931	8.29787	8.4632	8.13446	8.58921	8.56262	8.61903	8.52975	8.33918	8.09981	8.68078
Atp6v1d	ENSMUSG00000021114	ENSMUSG00000021114	-0.0881786	0.943027	-0.0990872	0.995681	-0.0938783	0.93969	-0.099944	0.98912		8.43502	8.63344	8.40385	8.73795	8.41562	8.58449	8.56895	8.57573	8.60481	8.51926	8.73992	8.4961	8.65754	8.55021	8.52018
Myo9a	ENSMUSG00000039585	ENSMUSG00000039585	-0.270508	0.664992	-0.42804	0.233801	-0.173902	0.832022	-0.270236	0.780388		8.04073	8.13937	8.12593	8.39161	8.34996	8.36925	8.16647	8.19632	8.44928	8.67556	8.47958	8.41658	8.42041	8.48097	8.19261
Rrm1	ENSMUSG00000030978	ENSMUSG00000030978	-0.00289277	0.998731	0.015252	0.995681	0.0441471	0.985028	-0.0565602	0.991778		8.32141	8.2564	8.51144	8.44288	8.34033	8.5022	8.29988	8.24104	8.44495	8.19576	8.53121	8.33242	8.27626	8.32726	8.52018
Ddost	ENSMUSG00000028757	ENSMUSG00000028757	-0.0197455	0.993088	-0.12651	0.995681	0.0547893	0.980748	-0.184468	0.966979		7.97897	8.13258	8.278	8.3686	8.22995	8.36925	7.98025	8.10251	8.17915	8.1009	8.35825	8.32895	8.18622	8.31846	7.95567
Sel1l	ENSMUSG00000020964	ENSMUSG00000020964	0.136964	0.894787	-0.016485	0.995681	-0.019506	0.989047	-0.0195932	0.993307		8.23818	8.61408	8.35907	8.55199	8.41103	8.3076	8.55376	8.4586	8.26022	8.34396	8.41038	8.51761	8.35666	8.25535	8.20852
Slk	ENSMUSG00000025060	ENSMUSG00000025060	0.0722848	0.976231	-0.0649148	0.995681	0.111502	0.956453	0.284223	0.95908		8.46349	8.61408	8.36513	8.22221	8.27614	8.09947	8.06302	8.13446	8.80045	8.49708	8.84273	8.23935	8.21527	8.36191	8.62658
Foxg1	ENSMUSG00000020950	ENSMUSG00000020950	0.215077	0.905996	0.0458562	0.995681	0.0531064	0.988899	-0.105602	0.990293		7.33318	7.17299	8.13304	7.93495	7.58289	7.64233	7.83078	7.60605	7.2244	7.62289	7.39576	7.7091	7.4896	7.05339	7.6489
Polr2i	ENSMUSG00000019738	ENSMUSG00000019738	-0.712507	0.0973524	-0.471607	0.614023	-0.412894	0.592646	-0.33727	0.925538		7.89785	7.93607	7.1639	8.24405	7.81611	7.96463	8.27694	7.83721	8.1422	8.16795	8.04984	8.23935	8.28084	8.69314	8.14383
Col11a1	ENSMUSG00000027966	ENSMUSG00000027966	-1.04506	0.0552405	-0.75459	0.453737	-0.840161	0.191757	-0.698083	0.618614		7.62292	7.31167	6.21704	7.97904	7.8368	7.64233	7.58406	7.59843	8.51269	7.72184	7.91754	7.99407	7.8886	8.24146	8.33944
Tmem248	ENSMUSG00000053094	ENSMUSG00000053094	-0.114837	0.904898	0.0866151	0.995681	-0.000925728	0.999106	0.112314	0.982436		8.53498	8.44355	8.53311	8.38179	8.43384	8.36925	8.53068	8.4159	8.56946	8.35633	8.23023	8.63469	8.63264	8.63411	8.59063
Nes	ENSMUSG00000004891	ENSMUSG00000004891	-0.581283	0.00777393	-0.122346	0.995681	-0.618644	0.0046508	-0.307163	0.684646		8.2513	8.19256	8.00324	8.52844	8.38784	8.41494	8.86495	8.66595	8.72749	8.22305	8.30839	8.26137	8.61821	8.61987	8.90225
Prkcsh	ENSMUSG00000003402	ENSMUSG00000003402	0.00251449	0.99911	0.00507987	0.995681	-0.205292	0.804705	-0.104716	0.98912		8.68274	8.427	8.36814	8.61202	8.53859	8.63941	8.53841	8.7196	8.82064	8.30619	8.44155	8.68714	8.26241	8.68632	8.49447
Smdt1	ENSMUSG00000022452	ENSMUSG00000022452	-0.0265364	0.992303	-0.0129999	0.995681	-0.0267802	0.988899	-0.0188477	0.993307		8.80791	8.75776	8.49222	8.62595	8.65579	8.83025	8.64615	8.7196	8.77309	8.90625	8.44923	8.70866	8.37823	9.02314	8.6655
Glmp	ENSMUSG00000001418	ENSMUSG00000001418	-0.136225	0.903543	-0.00835417	0.995681	-0.186113	0.831321	-0.132163	0.981523		8.14283	8.18602	8.47553	8.32485	8.24035	8.65473	8.56895	8.45439	8.37842	8.22305	8.30839	8.34622	8.54384	8.34468	8.36331
Rab21	ENSMUSG00000020132	ENSMUSG00000020132	0.139053	0.929329	-0.0504045	0.995681	0.0379095	0.988899	0.0238705	0.993307		7.7015	7.88851	8.32843	8.06337	8.02886	7.85618	7.88032	8.22134	7.77936	7.98881	8.34182	7.80216	7.8397	7.9021	7.87826
Arfgap1	ENSMUSG00000027575	ENSMUSG00000027575	-0.216901	0.842331	0.0269394	0.995681	-0.371383	0.518765	-0.117322	0.989259		8.78553	8.51315	8.07145	8.74051	8.39251	8.61221	8.91928	8.61401	8.96969	8.28908	8.52758	8.51456	8.5963	8.82317	8.63837
Map2k2	ENSMUSG00000035027	ENSMUSG00000035027	-0.242091	0.753981	-0.138234	0.995681	-0.178335	0.840213	-0.0490865	0.992218		8.90243	8.80975	8.46993	8.78838	8.76057	8.7892	8.72622	8.96147	9.02002	8.90344	8.99494	8.69255	8.73979	9.17944	8.95975
Wasf2	ENSMUSG00000028868	ENSMUSG00000028868	-0.169604	0.844008	-0.0391882	0.995681	-0.046294	0.984836	-0.0191089	0.993307		9.07471	9.14942	8.6932	8.98496	8.99953	9.00475	8.97164	9.03103	9.06584	9.14843	9.07165	8.81173	9.24126	9.19634	8.98458
Urm1	ENSMUSG00000069020	ENSMUSG00000069020	-0.0230656	0.993088	0.10362	0.995681	-0.0637705	0.981108	0.327895	0.824791		8.843	8.7175	8.46148	8.39487	8.2862	8.37388	8.40092	8.76794	8.99359	8.59779	8.56698	8.55967	8.30806	8.99029	8.72198
Scarf2	ENSMUSG00000012017	ENSMUSG00000012017	0.00450521	0.998731	-0.11812	0.995681	-0.0491752	0.988899	-0.389199	0.884634		7.58196	7.61418	8.04531	8.18505	8.18225	8.09387	8.01947	7.32143	8.01367	7.64323	7.98256	8.00716	7.92422	7.15568	8.07033
Hras	ENSMUSG00000025499	ENSMUSG00000025499	-0.0275533	0.991488	0.246766	0.887987	-0.0136271	0.992108	0.16394	0.967914		9.39154	9.19249	8.77275	8.96975	8.89489	9.04309	9.02216	9.25831	9.15068	8.95859	8.78315	8.91719	9.21034	9.31161	8.93128
Phc2	ENSMUSG00000028796	ENSMUSG00000028796	0.288852	0.956106	0.357322	0.995681	0.596965	0.85612	0.175452	0.992218		6.046	6.53425	8.01098	7.09683	6.97192	6.78669	6.62113	6.57455	6.45557	6.97971	6.87426	6.44088	7.43304	5.58249	6.96632
Cers5	ENSMUSG00000023021	ENSMUSG00000023021	0.230704	0.733122	0.0462737	0.995681	0.121683	0.913096	0.194522	0.95908		8.74436	8.83923	8.5518	8.57802	8.31106	8.63941	8.48738	8.71256	8.56148	8.67226	8.67911	8.6431	8.53619	8.59823	8.29048
Grb10	ENSMUSG00000020176	ENSMUSG00000020176	0.0437677	0.991488	-0.0856654	0.995681	0.0919352	0.975843	-0.0818048	0.992218		7.27012	7.25028	8.13304	7.84729	7.65457	7.6191	7.57657	7.68009	7.35009	7.48694	7.62347	7.98528	7.53639	7.37511	7.82425
Usp48	ENSMUSG00000043411	ENSMUSG00000043411	-0.189837	0.868287	-0.202046	0.986032	-0.0192909	0.989428	0.0775958	0.990293		8.22494	8.15955	8.09713	8.21116	8.07022	7.94608	8.18137	8.01366	8.32289	8.3231	8.24797	8.4899	8.0206	8.69314	8.2398
Slc39a1	ENSMUSG00000052310	ENSMUSG00000052310	-0.224304	0.900548	-0.00143655	0.999777	-0.135826	0.956203	-0.323509	0.964166		7.28295	7.43818	8.14715	8.00486	7.94875	8.06549	8.08959	7.8501	7.45712	7.8958	7.25372	7.83678	8.12122	7.56553	7.98674
Nomo1	ENSMUSG00000030835	ENSMUSG00000030835	-0.0220196	0.993093	0.154168	0.995681	-0.0207391	0.989147	0.0898786	0.990293		9.33411	9.25007	8.80427	8.94994	9.05944	9.14422	9.16641	9.2486	9.06584	9.25801	8.98439	8.66804	9.0822	9.42246	8.94083
Zfand5	ENSMUSG00000024750	ENSMUSG00000024750	-0.0132158	0.995885	0.059091	0.995681	0.114578	0.944146	-0.0331712	0.993307		7.88106	7.89654	8.31286	8.10773	7.94875	8.19686	8.16147	7.78448	7.85308	7.90706	7.83778	8.21323	8.22482	7.86029	8.09904
Luc7l	ENSMUSG00000024188	ENSMUSG00000024188	-0.0902912	0.934198	-0.114185	0.995681	-0.0692583	0.956453	-0.049605	0.991778		8.2513	8.15286	8.46993	8.39161	8.41562	8.25831	8.33138	8.39407	8.4054	8.43232	8.42605	8.40674	8.33918	8.4165	8.43714
Hsph1	ENSMUSG00000029657	ENSMUSG00000029657	0.160966	0.864077	0.267165	0.791212	0.0702973	0.960819	0.239269	0.884634		9.34333	9.56192	9.06068	9.02757	9.31183	8.91219	9.25123	9.30819	9.22071	9.16259	9.08405	8.9424	9.23891	9.125	9.14466
Pde4b	ENSMUSG00000028525	ENSMUSG00000028525	-0.40599	0.555524	-0.555792	0.264131	-0.335674	0.645855	-0.364384	0.768896		7.77603	7.61418	7.58794	8.15076	8.14402	7.70253	7.81176	7.88182	8.23537	7.94579	8.12856	8.48055	8.15158	7.94844	8.06451
Derl1	ENSMUSG00000022365	ENSMUSG00000022365	-0.101803	0.940091	0.0102479	0.995681	-0.00980065	0.994893	-0.108718	0.98912		8.80791	8.91635	8.49222	8.77843	8.87836	8.89295	8.70576	8.9193	8.61255	8.78639	8.56698	8.82657	9.03411	8.82317	8.64227
Srp19	ENSMUSG00000014504	ENSMUSG00000014504	-0.138816	0.860904	-0.042598	0.995681	-0.111014	0.907779	-0.0802152	0.989259		8.82117	8.74446	8.72884	8.68304	8.9934	8.84701	8.75638	8.95254	8.90499	8.82845	8.76786	8.81917	8.85807	8.95668	8.88586
Mcm4	ENSMUSG00000022673	ENSMUSG00000022673	0.334241	0.873261	0.0906148	0.995681	0.136749	0.968258	0.178546	0.990293		7.27012	7.2996	8.16113	7.44373	7.73025	7.20603	7.59893	7.4024	7.54062	7.6765	7.34721	7.63796	7.55165	6.17625	7.78943
Rasa3	ENSMUSG00000031453	ENSMUSG00000031453	0.138201	0.923624	0.0432166	0.995681	0.242142	0.804705	0.230549	0.966979		7.79407	7.81409	8.35907	7.7791	7.60718	7.99504	7.71951	7.80448	7.84653	7.91266	8.014	8.02872	7.66124	7.97106	8.02316
Ipo7	ENSMUSG00000066232	ENSMUSG00000066232	0.293118	0.835614	0.044143	0.995681	0.232803	0.875392	0.291574	0.966979		7.17692	7.49221	8.19889	7.62669	7.30457	7.2967	7.64981	7.47907	7.28377	7.81443	7.48073	7.6767	7.52869	7.35804	7.36662
Rnf10	ENSMUSG00000041740	ENSMUSG00000041740	0.0798911	0.952756	0.184633	0.949518	0.152042	0.868184	-0.0469317	0.992218		8.77194	8.83087	8.5196	8.81294	8.68651	8.75407	8.59514	8.60643	8.46218	8.39683	8.69212	8.46798	8.81445	8.62701	8.4099
Gatad1	ENSMUSG00000007415	ENSMUSG00000007415	0.276945	0.736089	0.252469	0.910048	0.306966	0.639706	0.116068	0.98912		8.01018	8.11891	8.41557	8.12745	8.12732	8.00104	7.95735	8.06431	7.64242	7.86726	8.11412	7.86582	8.11609	7.72709	7.91749
Ndufs8	ENSMUSG00000059734	ENSMUSG00000059734	-0.398562	0.505332	-0.178575	0.993883	-0.134044	0.933411	-0.222389	0.966979		8.60309	8.55437	7.99936	8.62039	8.63625	8.60039	8.44685	8.58732	8.55748	8.79854	8.32102	8.56853	8.61094	9.03661	8.6959
Macroh2a1	ENSMUSG00000015937	ENSMUSG00000015937	-0.269311	0.619265	0.084182	0.995681	-0.143213	0.861095	-0.0547937	0.990457		8.88149	8.97065	8.61664	8.78838	8.95921	8.88323	8.98867	8.91624	8.98765	8.79248	8.60189	8.81173	8.9759	9.25513	9.02105
Phf23	ENSMUSG00000018572	ENSMUSG00000018572	0.255416	0.740519	0.280495	0.827087	0.246047	0.727318	0.329173	0.746342		8.60309	8.74891	8.70279	8.27974	8.25066	8.53981	8.36657	8.30795	8.63552	8.46697	8.6326	8.0833	8.39525	8.4165	8.49014
Srxn1	ENSMUSG00000032802	ENSMUSG00000032802	0.388099	0.535041	0.225627	0.949477	0.395594	0.448924	0.36604	0.746342		8.29631	8.24386	8.44157	7.95717	7.9037	8.05399	7.64265	8.24104	7.88538	8.25864	8.0749	7.98968	7.84591	8.20852	7.75376
G3bp2	ENSMUSG00000029405	ENSMUSG00000029405	-0.108022	0.929012	-0.0710184	0.995681	-0.149257	0.884262	-0.121853	0.985616		8.30263	8.17945	8.50049	8.34857	8.58009	8.45486	8.45096	8.57573	8.43625	8.28477	8.49823	8.44251	8.5963	8.18453	8.53286
Zfp36l1	ENSMUSG00000021127	ENSMUSG00000021127	0.353643	0.702231	0.299161	0.901893	0.227946	0.840213	0.13307	0.98912		7.7205	7.77975	8.32533	7.93495	7.78805	7.82267	7.96884	7.62116	7.65746	7.78422	7.69635	7.58074	7.91244	7.3233	7.60952
Chchd1	ENSMUSG00000063787	ENSMUSG00000063787	-0.21175	0.866743	-0.201126	0.993883	-0.111906	0.950891	-0.137444	0.98912		7.65289	8.04853	8.1921	8.05515	7.97388	8.32685	8.04684	8.21138	8.03686	8.22754	7.93407	8.36668	8.50124	7.87836	8.14934
Rai14	ENSMUSG00000022246	ENSMUSG00000022246	-0.0339436	0.991488	0.0181396	0.995681	0.106415	0.944146	0.0572686	0.992218		8.44648	8.26263	8.6039	8.1469	8.53438	8.48088	8.37524	8.34939	8.30867	8.55549	8.6122	8.07917	8.52463	8.55771	8.35857
Scamp3	ENSMUSG00000028049	ENSMUSG00000028049	0.254044	0.714279	0.0627846	0.995681	0.170285	0.840213	0.130305	0.980674		8.76738	8.75776	8.49774	8.4924	8.6519	8.48517	8.57648	8.68406	8.21009	8.5519	8.52394	8.74297	8.46542	8.42472	8.37275
Selenoh	ENSMUSG00000076437	ENSMUSG00000076437	-0.141698	0.842331	-0.0659988	0.995681	-0.0416349	0.98083	0.00201711	0.998729		8.72097	8.68074	8.60901	8.66965	8.6441	8.68115	8.76629	8.7196	8.63552	8.81656	8.71463	8.66529	8.74312	8.91353	8.75844
Tfap2b	ENSMUSG00000025927	ENSMUSG00000025927	-0.478662	0.608744	-0.632568	0.378132	-0.545515	0.408615	-0.265558	0.967914		7.79407	7.34729	7.23832	7.7741	7.85043	7.55523	7.84956	7.8242	8.29911	7.80844	7.92858	8.45211	7.44943	8.17968	8.09335
Tnrc6a	ENSMUSG00000052707	ENSMUSG00000052707	0.0718889	0.951127	0.0781066	0.995681	0.0379701	0.985028	0.0179299	0.993307		8.82556	8.80549	8.70756	8.73538	8.73875	8.80301	8.66747	8.79151	8.75572	8.7618	8.69536	8.6403	8.81445	8.74656	8.53707
Zfp703	ENSMUSG00000085795	ENSMUSG00000085795	0.243192	0.862891	-0.0169902	0.995681	0.162733	0.934644	0.161177	0.98912		8.01018	8.21201	8.31911	8.00059	7.89715	8.18108	8.23472	8.03074	7.78622	8.55906	8.35416	7.52115	7.91244	7.92545	8.01112
Vasn	ENSMUSG00000039646	ENSMUSG00000039646	0.221799	0.912694	0.0195758	0.995681	0.238497	0.908135	-0.00559226	0.998729		7.17692	7.11906	8.17498	7.46248	7.5747	7.75322	7.30453	7.45396	7.32204	7.3201	7.67027	7.70375	7.55922	6.81161	7.63327
Hnrnpl	ENSMUSG00000015165	ENSMUSG00000015165	0.0801531	0.972522	0.0498529	0.995681	0.0975913	0.967342	-0.0883194	0.990293		7.5398	7.6239	8.25537	7.9963	7.85043	7.98295	8.03048	7.84367	7.32204	7.90144	7.70922	7.81214	7.93007	7.60222	7.78943
Bzw1	ENSMUSG00000051223	ENSMUSG00000051223	0.0816384	0.959224	0.0544872	0.995681	0.160328	0.878214	0.0292581	0.993307		8.49141	8.76656	8.68113	8.3686	8.71659	8.7647	8.48738	8.64761	8.3276	8.66896	8.76478	8.33242	8.61094	8.61269	8.4858
Neo1	ENSMUSG00000032340	ENSMUSG00000032340	0.106781	0.950322	0.0150844	0.995681	0.229595	0.816426	-0.204036	0.967914		7.88106	7.66211	8.22242	8.1661	8.13291	8.16512	7.7263	7.79117	7.66492	7.94579	7.84363	8.02013	8.12122	7.62379	7.75376
Gatad2a	ENSMUSG00000036180	ENSMUSG00000036180	-0.0316315	0.991075	0.328347	0.53935	0.0981584	0.93837	0.29516	0.71642		9.17452	9.11884	8.82418	8.73538	8.72402	8.78224	8.89538	8.94955	8.98169	8.5519	8.84565	8.72987	8.89145	9.21304	9.09134
Shisa5	ENSMUSG00000025647	ENSMUSG00000025647	0.153305	0.860904	0.15963	0.975477	0.0425868	0.985028	0.103988	0.98912		9.34945	9.37612	8.96431	9.09723	9.07404	9.21826	9.08425	9.16599	9.31622	9.14843	9.08652	8.98932	8.95883	9.16234	9.11684
Cenpa	ENSMUSG00000029177	ENSMUSG00000029177	-0.0887402	0.984235	-0.0928221	0.995681	-0.169377	0.956453	-0.176283	0.990293		6.78418	7.07725	8.04531	7.65414	7.66232	7.46254	7.99156	7.3028	7.36849	7.30315	7.60294	7.61534	7.91244	6.69414	7.66435
Capza2	ENSMUSG00000015733	ENSMUSG00000015733	0.24373	0.839079	0.322855	0.85748	0.196953	0.880553	0.0723461	0.992218		7.7299	7.79702	8.39205	7.82813	7.96137	8.05399	8.00837	7.88182	7.54871	7.78422	7.8022	7.50894	7.92422	7.6798	7.72457
Marchf5	ENSMUSG00000023307	ENSMUSG00000023307	-0.0594738	0.981805	-0.0956	0.995681	0.0856691	0.968258	0.0194837	0.993307		7.65289	7.57466	8.21908	7.86149	7.98628	7.65762	7.79894	7.72275	7.8066	7.71545	7.94499	8.16343	8.12632	7.6798	7.91749
Snhg4 ENSMUSG00000117869	ENSMUSG00000117869	ENSMUSG00000117869	0.0954085	0.967569	0.244068	0.993883	0.331725	0.78812	0.108501	0.990293		7.35766	7.18616	8.22575	7.57592	7.4549	7.69514	7.34037	7.55186	7.16249	7.40989	7.34721	7.56902	7.82093	7.39197	7.52739
Cavin3	ENSMUSG00000037060	ENSMUSG00000037060	0.238167	0.825587	0.366518	0.7123	0.303976	0.69212	0.0151559	0.994191		8.04073	7.81409	8.32222	8.11959	8.06438	8.01891	7.91043	7.94324	7.4485	7.73453	7.64372	7.78706	8.08496	7.72709	7.70228
Ndufb1	ENSMUSG00000113902	ENSMUSG00000113902	0.252425	0.926242	0.069373	0.995681	0.233402	0.93969	-0.0352327	0.993307		6.63197	7.09132	8.01868	7.44373	7.40035	7.40029	7.30453	7.19581	6.93449	7.23331	7.0052	7.62669	7.66124	6.09619	7.23826
Bcl9	ENSMUSG00000038256	ENSMUSG00000038256	0.0418387	0.991157	-0.0747282	0.995681	0.0356187	0.988899	-0.259215	0.95908		7.71103	7.90454	8.13304	8.22221	8.22473	8.12169	7.87422	8.07533	7.73041	7.77196	8.05489	8.16732	8.22482	7.77929	7.60151
Rala	ENSMUSG00000008859	ENSMUSG00000008859	-0.113139	0.915114	-0.0295854	0.995681	0.0327985	0.988797	-0.0433946	0.992218		8.64843	8.7084	8.42138	8.73538	8.56363	8.58848	8.34468	8.64021	8.66931	8.56973	8.65604	8.63187	8.66106	8.83863	8.59467
Coprs	ENSMUSG00000031458	ENSMUSG00000031458	-0.0678552	0.969713	-0.232582	0.935382	-0.023249	0.989047	-0.147591	0.982436		8.11439	8.39899	8.12949	8.26912	8.34033	8.47657	7.97456	8.53241	8.15816	8.42451	8.29992	8.59767	8.36533	8.42881	8.02316
Gpaa1	ENSMUSG00000022561	ENSMUSG00000022561	-0.168462	0.894787	-0.0792135	0.995681	-0.225618	0.813422	-0.0601346	0.992218		8.89827	8.83506	8.353	8.6857	8.73875	8.87016	8.73634	9.01967	9.01711	8.66896	8.88586	8.7917	8.80174	9.15742	8.60271
Gm15536	ENSMUSG00000081926	ENSMUSG00000081926	0.485439	0.361837	0.329479	0.837499	0.4049	0.522317	0.285018	0.940635		9.48337	9.55939	8.6932	8.92086	9.12259	8.96537	8.61357	9.00246	9.00834	8.87219	9.13975	8.85339	8.86114	8.91645	8.62263
Arl6ip4	ENSMUSG00000029404	ENSMUSG00000029404	-0.324021	0.688024	-0.0515627	0.995681	-0.359261	0.549007	-0.00891195	0.99695		8.78553	8.65255	8.12949	8.59795	8.52591	8.51485	8.89538	9.01109	8.76616	8.58031	8.60533	8.58317	8.48543	9.08408	8.944
Setd1b	ENSMUSG00000038384	ENSMUSG00000038384	0.125948	0.949762	0.08995	0.995681	0.0432491	0.988899	-0.121861	0.990293		7.86408	8.05572	8.16461	8.28326	8.4018	7.68771	8.04684	8.08626	7.83995	7.96746	7.84363	8.02872	8.28542	7.76642	7.59346
Tiparp	ENSMUSG00000034640	ENSMUSG00000034640	0.70626	0.216257	0.239728	0.993883	0.477705	0.577172	0.440475	0.820282		7.36974	7.55449	8.17842	7.41833	7.29463	7.2571	7.13122	7.23564	7.48268	7.53127	7.84363	7.10847	7.39123	6.90855	6.8359
Ptms	ENSMUSG00000030122	ENSMUSG00000030122	-0.0247886	0.992787	0.0908066	0.995681	-0.0288524	0.988899	0.028411	0.993307		9.61609	9.38472	8.7659	9.22355	9.36265	9.19487	9.1714	9.30819	9.46257	9.14606	9.20478	9.24642	9.33466	9.14005	9.45347
Bbx	ENSMUSG00000022641	ENSMUSG00000022641	-0.121916	0.941894	-0.012682	0.995681	-0.0723095	0.975843	0.0994378	0.990293		9.29979	9.30846	8.42718	8.93883	8.96235	8.97456	9.0083	9.16599	9.20544	9.09774	9.06166	9.04961	9.15645	9.35955	8.99379
Usp7	ENSMUSG00000022710	ENSMUSG00000022710	0.117328	0.894787	-0.0876099	0.995681	0.0940829	0.932952	-0.0378408	0.992218		8.45217	8.31754	8.45298	8.42068	8.44736	8.48088	8.24421	8.32652	8.38295	8.5008	8.49452	8.4992	8.18133	8.31404	8.38679
Tmem123	ENSMUSG00000050912	ENSMUSG00000050912	0.132018	0.908642	-0.0408544	0.995681	-0.0561679	0.980748	-0.267186	0.858547		8.21158	8.19907	8.20902	8.43024	8.61245	8.35993	8.08959	8.22629	8.44928	8.09107	8.1523	8.46165	8.03696	7.97106	8.21378
Sdf4	ENSMUSG00000029076	ENSMUSG00000029076	-0.0742374	0.959224	-0.0354153	0.995681	-0.0551123	0.977471	-0.0605342	0.990293		8.45217	8.5645	8.39796	8.56362	8.47841	8.54393	8.71602	8.40284	8.43188	8.58383	8.31682	8.59478	8.41207	8.71004	8.49014
Actn4	ENSMUSG00000054808	ENSMUSG00000054808	0.179459	0.903694	-0.00763579	0.995681	0.0340995	0.988899	0.334833	0.886811		8.54567	8.48678	8.27479	8.0176	7.91672	8.35056	8.22036	8.38081	8.58528	8.26303	8.42994	8.61487	8.12632	7.82968	8.69213
Emc7	ENSMUSG00000055943	ENSMUSG00000055943	0.318048	0.871705	0.109477	0.995681	0.286535	0.889026	0.195786	0.989259		7.03239	6.84782	8.13658	7.048	7.33397	7.45381	7.32256	7.33065	6.89696	7.36161	7.29696	7.44624	7.57424	6.69414	7.09734
Scd1	ENSMUSG00000037071	ENSMUSG00000037071	-0.431751	0.357431	-0.312743	0.800358	-0.457774	0.267234	-0.347368	0.747814		8.30892	7.97454	7.86915	8.38508	8.45184	8.35525	8.48338	8.53241	8.50439	8.12521	8.3252	8.59478	8.17641	8.66912	8.55376
Pole3	ENSMUSG00000028394	ENSMUSG00000028394	-0.208986	0.835614	-0.245288	0.905396	-0.175362	0.861095	-0.0528925	0.992218		8.81234	8.41587	8.26511	8.4046	8.6519	8.62004	8.58023	8.76113	8.69869	8.71132	8.77705	8.76369	8.58522	8.98474	8.52865
Washc5	ENSMUSG00000022350	ENSMUSG00000022350	-0.20029	0.812248	0.00189753	0.999141	-0.138842	0.898423	-0.109186	0.98912		8.04073	8.11891	8.4643	8.34183	8.44287	8.23302	8.37091	8.33112	8.40985	8.17728	8.35006	8.16343	8.31255	8.4691	8.50738
Chmp5	ENSMUSG00000028419	ENSMUSG00000028419	0.14726	0.961849	0.129812	0.995681	0.359008	0.840213	0.0290439	0.993307		6.87174	7.07725	8.06774	7.40547	7.44595	7.4273	7.56146	6.65018	6.94679	7.1314	7.22713	7.58074	7.36555	6.68048	7.70975
Vcam1	ENSMUSG00000027962	ENSMUSG00000027962	0.443419	0.588444	0.199356	0.993883	0.47946	0.44726	0.338457	0.920649		7.7205	7.38205	8.21574	7.58736	7.63895	7.22668	7.23958	7.44549	7.38665	7.44121	7.77799	7.66022	7.33059	7.57294	7.25876
Nrd1	ENSMUSG00000053510	ENSMUSG00000053510	-0.161609	0.908642	-0.148802	0.995681	-0.128458	0.93969	0.173513	0.980471		8.92308	8.80121	8.16113	8.4863	8.52591	8.43726	8.58397	8.70549	9.02293	8.80758	8.89715	8.69794	8.55145	9.07627	8.7692
Gps2	ENSMUSG00000023170	ENSMUSG00000023170	-0.332741	0.843611	-0.25702	0.995681	-0.178783	0.944146	0.110193	0.991778		8.48031	7.93607	6.93082	7.93942	7.67003	7.75322	8.0737	7.973	8.17915	7.92932	8.04984	8.43284	7.8946	8.61987	8.07033
Txndc9	ENSMUSG00000058407	ENSMUSG00000058407	0.0137309	0.995885	-0.0458861	0.995681	0.0533765	0.985028	0.0476487	0.992218		7.88106	7.82255	8.30973	8.09175	7.86393	7.99504	8.08959	7.96117	7.89175	8.02025	8.04477	8.17121	7.9359	7.90797	8.20852
Armc1	ENSMUSG00000027599	ENSMUSG00000027599	0.0334901	0.991075	-0.0842753	0.995681	0.0522768	0.979265	0.0775612	0.990293		8.07803	8.19907	8.33461	8.16991	8.18763	8.05399	8.08431	8.24104	8.16343	8.15385	8.25676	8.46165	8.15658	8.20376	8.18728
Dnajc3	ENSMUSG00000022136	ENSMUSG00000022136	0.139062	0.892449	-0.0323625	0.995681	0.0264994	0.988899	-0.0857217	0.990293		8.55628	8.37618	8.35604	8.51353	8.61245	8.40592	8.40516	8.30328	8.49186	8.28908	8.49452	8.57733	8.39525	8.31404	8.14934
Fxr2	ENSMUSG00000018765	ENSMUSG00000018765	0.101127	0.943027	-0.0805676	0.995681	0.243352	0.729682	-0.182122	0.967914		7.91444	7.83096	8.17842	8.20746	8.12171	8.18636	7.62096	7.96117	7.65746	8.12521	7.93407	8.14776	7.91244	7.95412	7.81042
Tk1	ENSMUSG00000025574	ENSMUSG00000025574	0.0280231	0.991488	0.206114	0.949477	0.0759887	0.964372	0.032033	0.993307		8.94747	9.05565	8.44729	8.93659	8.73875	8.70342	8.6604	8.85682	8.74167	8.659	8.53843	8.67625	8.8703	8.91645	8.5987
Tubb2a	ENSMUSG00000058672	ENSMUSG00000058672	-0.369066	0.714279	-0.613665	0.326096	-0.411516	0.592646	-0.364227	0.883109		7.2176	7.26277	7.82153	7.65957	7.86393	7.97076	7.87422	8.12389	7.59633	7.84402	8.01918	8.32895	8.00405	7.52787	7.94306
Apoe	ENSMUSG00000002985	ENSMUSG00000002985	-0.338197	0.716729	-0.650584	0.136665	-0.585081	0.163553	-0.325245	0.89793		7.93898	7.37055	7.54594	7.80872	7.99244	8.05399	7.97456	8.19127	8.4275	7.96746	8.35006	8.4553	7.66124	8.1353	8.05868
Cltb	ENSMUSG00000047547	ENSMUSG00000047547	0.0973776	0.938459	0.236366	0.861634	0.206117	0.782161	0.189311	0.964174		8.9833	8.91635	8.77502	8.65885	8.77851	8.66989	8.45913	8.73705	8.83724	8.81357	8.67911	8.45848	8.81129	8.92806	8.62263
Txnl4a	ENSMUSG00000057130	ENSMUSG00000057130	-0.204713	0.898912	-0.108939	0.995681	-0.220117	0.880553	-0.213674	0.974212		8.01018	7.55449	8.19889	8.02603	8.31598	8.13813	8.23472	8.09711	8.17393	8.11068	7.95582	8.10781	7.52096	8.57257	8.18192
Upf2	ENSMUSG00000043241	ENSMUSG00000043241	0.00356998	0.998529	0.00968526	0.995681	0.00228499	0.999106	0.118142	0.98912		7.94706	8.08415	8.32533	8.12745	8.01682	7.90183	7.87422	8.24592	8.25528	8.07119	7.97725	8.30795	8.14153	8.10494	8.15482
Gar1	ENSMUSG00000028010	ENSMUSG00000028010	0.42205	0.906762	0.409953	0.995681	0.37749	0.929138	0.162794	0.992218		6.67155	6.94401	7.99936	7.22685	7.25418	7.02928	7.38395	6.85585	6.52283	7.3285	6.59816	6.77264	7.5817	5.74882	6.88949
Cbfb	ENSMUSG00000031885	ENSMUSG00000031885	0.382636	0.733122	0.443401	0.776298	0.207921	0.908644	0.168839	0.98912		7.39361	7.49221	8.22242	7.69172	7.68532	7.40935	7.6781	7.26481	7.70891	7.3201	7.36357	7.31906	7.55165	6.94329	7.60151
Eif2b2	ENSMUSG00000004788	ENSMUSG00000004788	-0.0322209	0.991488	0.0157173	0.995681	-0.0631975	0.9732	-0.00454071	0.997635		8.2513	8.4761	8.43295	8.48018	8.35475	8.34585	8.34026	8.68406	8.30867	8.41665	8.48707	8.21699	8.20565	8.64822	8.38212
Atp5j	ENSMUSG00000022890	ENSMUSG00000022890	-0.0612816	0.991488	0.13154	0.995681	0.0738149	0.988899	-0.0226215	0.995331		6.92184	6.74476	7.99936	7.39899	7.33397	7.382	7.523	7.13393	7.14124	7.00088	6.95207	7.60963	7.78263	6.35889	7.70228
Cd47	ENSMUSG00000055447	ENSMUSG00000055447	0.0374654	0.991488	-0.00814785	0.995681	0.00103557	0.999106	-0.0526388	0.992218		8.52961	8.66671	8.47553	8.52547	8.648	8.65473	8.54994	8.19127	8.85366	8.42059	8.89433	8.31849	8.36533	8.55396	8.63052
Cdk11b	ENSMUSG00000029062	ENSMUSG00000029062	-0.0946443	0.951761	-0.107427	0.995681	-0.103336	0.944146	0.0234389	0.993307		8.50243	8.60919	8.38014	8.39161	8.55533	8.47226	8.64615	8.39846	8.73105	8.50822	8.62243	8.67078	8.22005	8.85696	8.62263
Bag1	ENSMUSG00000028416	ENSMUSG00000028416	-0.0717352	0.951761	0.190546	0.896556	-0.102632	0.916943	0.148996	0.967914		8.52421	8.52875	8.62423	8.45542	8.34996	8.43726	8.77287	8.60643	8.60868	8.40081	8.4908	8.22821	8.59997	8.63057	8.67316
Actr1b	ENSMUSG00000037351	ENSMUSG00000037351	-0.0774076	0.95249	-0.158452	0.986701	-0.0752946	0.956453	0.0488667	0.992218		8.09995	8.21844	8.29395	8.26557	8.10475	8.10506	8.43032	8.31262	8.09326	8.25864	8.41823	8.41985	8.35231	8.26911	8.2398
Farsb	ENSMUSG00000026245	ENSMUSG00000026245	0.101302	0.932976	0.168542	0.98619	0.0963354	0.942536	0.245788	0.884184		9.33103	9.19575	8.84381	8.82023	8.91124	8.92804	9.05219	9.03103	9.02002	8.88078	9.09389	8.90559	9.03139	9.22014	8.8045
Nhlrc2	ENSMUSG00000025078	ENSMUSG00000025078	-0.0642292	0.977398	-0.184801	0.993883	-0.0797078	0.968258	-0.317048	0.871902		7.61278	7.68084	8.26835	8.04274	8.43384	8.14899	7.98592	7.90052	8.05401	8.18193	8.10442	7.96306	7.95324	8.10494	7.82425
Epb41l1	ENSMUSG00000027624	ENSMUSG00000027624	0.125406	0.945087	0.0818659	0.995681	0.0700582	0.980806	0.190171	0.974848		8.799	8.85582	8.44157	8.54026	8.4018	8.60039	8.37091	8.85042	8.64687	8.6355	8.79526	8.41985	8.11095	8.93958	8.57436
Baz2b	ENSMUSG00000026987	ENSMUSG00000026987	-0.321311	0.769739	-0.367121	0.82826	-0.274303	0.816705	-0.0880644	0.990293		8.30892	8.41587	7.74933	8.18128	8.29121	8.31725	8.25363	8.17087	8.8273	8.53749	8.57754	8.50228	8.09019	8.76286	8.54961
Gpatch4	ENSMUSG00000028069	ENSMUSG00000028069	-0.195141	0.836523	-0.0776512	0.995681	-0.0314296	0.988899	0.103533	0.989259		8.59282	8.43806	8.30658	8.47403	8.31598	8.21764	8.39667	8.54436	8.48344	8.53749	8.51298	8.51456	8.29452	8.86906	8.69213
Eftud2	ENSMUSG00000020929	ENSMUSG00000020929	0.0751953	0.965879	-0.155855	0.995681	0.157461	0.908135	0.00892013	0.996363		8.08537	8.00459	8.12949	8.22221	7.93602	8.01891	7.70584	8.0917	7.94176	8.25424	8.17566	8.25772	8.28542	7.62379	8.02316
Gm10269	ENSMUSG00000091449	ENSMUSG00000091449	-0.0446013	0.991488	0.110017	0.995681	0.152846	0.936562	0.0413188	0.993307		8.7628	8.72203	8.2844	8.45854	8.52165	8.68861	8.34468	8.74052	8.20498	8.65233	8.36232	8.44251	8.70609	8.97638	8.116
Rpl7a-ps7	ENSMUSG00000106258	ENSMUSG00000106258	0.399629	0.6685	0.222794	0.993883	0.521692	0.359121	0.164452	0.98912		8.67302	8.70382	8.2844	8.42387	8.32577	8.44168	7.73306	8.38966	7.9356	8.21401	8.66267	8.0833	8.23903	7.74689	8.43264
Gm5586	ENSMUSG00000108366	ENSMUSG00000108366	0.510511	0.355839	0.315089	0.887573	0.447086	0.459898	0.218686	0.967914		8.66324	9.01562	8.40091	8.43341	8.42931	8.61221	8.36222	8.48776	7.88538	8.48586	8.43382	8.26863	8.39947	8.36618	7.76096
Tax1bp1	ENSMUSG00000004535	ENSMUSG00000004535	-0.0616305	0.965879	-0.269326	0.773599	-0.0346701	0.988797	0.0360291	0.992218		8.38232	8.37618	8.1921	8.28677	8.34516	8.19686	8.21071	8.25564	8.55347	8.58733	8.50563	8.6403	8.20565	8.39156	8.51166
Clstn1	ENSMUSG00000039953	ENSMUSG00000039953	-0.00446298	0.996448	0.069564	0.995681	-0.0880819	0.946219	0.152459	0.967914		8.41767	8.55437	8.44157	8.33167	8.39251	8.23302	8.519	8.64392	8.50855	8.28477	8.3252	8.57441	8.20082	8.68289	8.50309
Atox1	ENSMUSG00000018585	ENSMUSG00000018585	0.160509	0.894787	0.24012	0.917991	0.062753	0.97756	0.185564	0.967914		7.89785	8.15955	8.40091	8.03858	7.99244	7.95229	8.28616	7.90052	8.13685	7.95123	7.83191	8.03299	7.85208	8.1202	8.07612
Ccn4	ENSMUSG00000005124	ENSMUSG00000005124	0.212268	0.911888	0.0986609	0.995681	0.0162884	0.994893	0.0969544	0.991778		7.35766	7.03419	8.12236	7.49928	7.63107	7.36347	7.6781	7.62116	7.4311	7.47942	7.08632	7.83189	7.11122	7.52022	7.50181
Acsl4	ENSMUSG00000031278	ENSMUSG00000031278	0.0790443	0.975337	-0.291917	0.926897	0.141733	0.943935	-0.466637	0.696296		7.07729	7.25028	7.93978	7.99201	7.98628	7.87592	7.27705	7.31215	7.47421	7.79638	7.83191	7.71443	7.55165	7.06395	7.58537
Tnpo1	ENSMUSG00000009470	ENSMUSG00000009470	0.0941492	0.951761	0.219253	0.926897	0.0620934	0.975843	-0.142454	0.980471		8.54567	8.65255	8.48111	8.63148	8.81372	8.65092	8.60254	8.6365	8.21518	8.45934	8.42605	8.12392	8.58892	8.56144	8.21378
Myadm	ENSMUSG00000068566	ENSMUSG00000068566	0.374858	0.632143	0.193941	0.993883	0.18998	0.877788	0.12612	0.98912		8.86023	8.66671	8.38908	8.48018	8.29121	8.75407	8.24893	8.63278	8.46646	8.23203	8.49452	8.6063	8.20082	7.99333	8.57436
Nop56	ENSMUSG00000027405	ENSMUSG00000027405	0.0702253	0.981805	-0.153349	0.995681	0.205845	0.911531	0.314636	0.964166		8.3338	7.97454	7.94787	7.93047	7.59913	7.79529	7.31357	8.12919	8.09326	8.00985	8.45306	8.23565	7.4896	8.30961	8.14934
Msmo1	ENSMUSG00000031604	ENSMUSG00000031604	0.443045	0.156283	0.15696	0.99204	0.324785	0.434703	0.185435	0.964166		8.17761	8.17945	8.36814	8.10773	8.03484	8.05975	7.93408	7.87553	7.98414	8.26303	7.94499	8.06672	7.72994	7.82968	7.88487
Mrpl53	ENSMUSG00000030037	ENSMUSG00000030037	0.0863157	0.965879	-0.017047	0.995681	0.219632	0.868184	-0.0710094	0.992218		7.4516	7.55449	8.09713	7.85677	7.86393	7.71719	7.53851	7.59843	7.4485	7.58833	7.58212	8.05417	7.9417	7.40033	7.58537
Csrp2	ENSMUSG00000020186	ENSMUSG00000020186	-0.199915	0.806221	-0.231875	0.86202	-0.247975	0.666618	-0.452252	0.187167		8.38232	8.14613	7.99546	8.61202	8.59231	8.65473	8.5229	8.35392	8.36931	8.21853	8.51298	8.4553	8.40788	8.4165	8.28048
Usp47	ENSMUSG00000059263	ENSMUSG00000059263	0.0521599	0.979735	0.148505	0.995681	0.172687	0.870447	-0.0202173	0.993307		8.35827	8.42145	8.47833	8.28326	8.66739	8.35525	8.1863	8.07533	8.46646	8.19576	8.35825	8.26863	8.54765	8.46512	8.04693
Eloc	ENSMUSG00000079658	ENSMUSG00000079658	0.333516	0.86569	0.121023	0.995681	0.208964	0.93969	0.144281	0.990293		7.32079	7.28743	8.08618	7.54692	7.44595	7.45381	7.60631	7.3028	7.33145	7.36977	7.50307	7.63234	7.71646	6.11663	7.59346
Adgrl1	ENSMUSG00000013033	ENSMUSG00000013033	-0.108943	0.948833	-0.179836	0.993883	-0.147759	0.915919	-0.159248	0.980471		8.72568	8.69924	8.10076	8.75833	8.62836	8.65473	8.45913	8.76794	8.76616	8.50822	8.96575	8.59478	8.65754	8.55771	8.68078
Mfsd5	ENSMUSG00000045665	ENSMUSG00000045665	0.246715	0.72561	0.308122	0.689614	0.261727	0.665987	0.345353	0.664376		9.33719	9.11195	8.80427	8.76338	8.65967	8.82349	8.70232	9.03386	8.74167	8.78334	8.83101	8.74818	8.71967	8.99029	8.82183
Cpsf6	ENSMUSG00000055531	ENSMUSG00000055531	-0.0730231	0.963295	-0.0761173	0.995681	-0.0931102	0.946219	-0.226192	0.944108		7.91444	8.03403	8.22575	8.37191	8.13291	8.3646	8.03048	8.28915	8.16343	7.98881	8.26113	8.17894	8.29452	8.15519	7.96194
Snx5	ENSMUSG00000027423	ENSMUSG00000027423	0.267911	0.701878	0.115883	0.995681	0.355526	0.402635	0.234351	0.925538		8.10719	8.15955	8.31911	8.0837	8.07022	7.73171	7.91638	7.77775	7.86608	8.03572	8.0749	8.15562	8.09019	7.86634	7.85151
Slc7a1	ENSMUSG00000041313	ENSMUSG00000041313	0.467413	0.122796	0.465533	0.157622	0.530201	0.0489127	0.531769	0.0576806		8.65832	8.85993	8.59363	8.13915	8.13291	8.26332	8.06837	8.17087	8.2943	8.28045	8.37449	8.06672	8.32148	8.33163	8.05282
Dad1	ENSMUSG00000022174	ENSMUSG00000022174	0.142829	0.862891	-0.0440094	0.995681	0.0306808	0.988797	-0.0646742	0.990293		8.66324	8.7084	8.50871	8.56939	8.7927	8.69973	8.65329	8.50007	8.62025	8.70488	8.58454	8.70599	8.39947	8.57995	8.45946
Prkg2	ENSMUSG00000029334	ENSMUSG00000029334	0.31682	0.751635	0.0854188	0.995681	0.3614	0.63927	0.164342	0.983044		7.8119	8.09816	8.22242	7.95717	7.86393	7.86937	8.04141	7.65827	7.32204	8.05609	7.90081	7.96753	7.98731	7.35804	7.83111
Ndufs2	ENSMUSG00000013593	ENSMUSG00000013593	-0.236152	0.753981	-0.172625	0.986701	-0.282884	0.622289	-0.287525	0.780388		7.98683	7.98964	8.20565	8.43341	8.4563	8.15439	8.39241	8.49598	8.1422	8.37266	8.157	8.19046	8.40788	8.24611	8.25519
Nav3	ENSMUSG00000020181	ENSMUSG00000020181	0.105827	0.951761	0.0366952	0.995681	0.200292	0.860546	0.0938634	0.990293		7.7299	7.92825	8.35604	7.82813	7.91672	8.09947	7.77294	7.79117	7.96613	8.21401	7.99311	7.78706	8.09541	7.93123	7.76813
Pim1	ENSMUSG00000024014	ENSMUSG00000024014	0.579062	0.555699	0.223093	0.995681	0.657425	0.361126	0.683184	0.519603		7.06248	6.94401	8.07515	6.78541	6.65213	6.98149	6.4996	6.88118	7.07556	7.3201	7.28842	7.16407	6.84002	6.79902	7.08591
Cacybp	ENSMUSG00000014226	ENSMUSG00000014226	0.14075	0.868287	0.183021	0.921832	0.0800652	0.944146	0.191275	0.939453		8.49141	8.52875	8.6141	8.35193	8.46519	8.25831	8.40092	8.50007	8.50855	8.46316	8.38254	8.25772	8.39525	8.51985	8.30534
Mrps17	ENSMUSG00000034211	ENSMUSG00000034211	0.077926	0.956106	0.185831	0.949518	0.169827	0.840213	-0.0431957	0.992218		8.38827	8.57955	8.52231	8.4523	8.66739	8.50643	8.49137	8.31726	8.16869	8.42059	8.28281	8.24304	8.63264	8.31404	8.29545
Rpl13a	ENSMUSG00000074129	ENSMUSG00000074129	0.125224	0.904898	0.302904	0.679101	0.0408628	0.985028	0.0679034	0.990293		8.32762	8.42145	8.52772	8.31112	8.34516	8.44168	8.4713	8.50823	8.17393	8.20035	8.10928	8.09151	8.44922	8.35762	8.09335
Ppp2r5e	ENSMUSG00000021051	ENSMUSG00000021051	0.275619	0.778468	0.33683	0.800358	0.0470556	0.986915	0.351564	0.777705		9.50818	9.32344	8.87595	8.71206	9.04173	8.94683	8.98585	9.39649	9.21055	9.13173	8.91113	8.68442	8.81445	9.23424	8.85252
Suds3	ENSMUSG00000066900	ENSMUSG00000066900	-0.198247	0.799255	-0.0198985	0.995681	-0.174839	0.824172	-0.0836911	0.990293		8.46912	8.59938	8.42429	8.66426	8.58417	8.47657	8.80849	8.65864	8.52504	8.71132	8.4454	8.37343	8.76947	8.67258	8.63052
Psme3	ENSMUSG00000078652	ENSMUSG00000078652	0.102852	0.945168	0.16248	0.993883	0.191833	0.840213	0.168328	0.967914		8.63848	8.80549	8.50323	8.59795	8.39716	8.44168	8.18137	8.77133	8.36473	8.56618	8.58802	8.30088	8.63264	8.59095	8.4099
Gm43712	ENSMUSG00000104649	ENSMUSG00000104649	0.1134	0.934198	0.209114	0.949518	0.116652	0.93969	0.108581	0.989259		8.60309	8.42145	8.55973	8.29726	8.45184	8.51904	8.56517	8.58732	8.02531	8.35222	8.38655	8.23193	8.61821	8.37469	8.23463
Max	ENSMUSG00000059436	ENSMUSG00000059436	0.162344	0.915114	0.175414	0.995681	0.155512	0.926954	-0.0139676	0.995331		7.7015	7.86413	8.17498	8.07966	7.98628	7.76031	7.80536	8.02507	7.46569	7.7282	7.60982	7.93137	8.07443	7.54305	7.65664
Pgrmc1	ENSMUSG00000006373	ENSMUSG00000006373	0.316136	0.742319	0.33667	0.82826	0.440067	0.460718	0.189187	0.975769		7.8119	7.7085	8.24557	7.7741	7.78805	7.73892	7.55385	7.62116	7.3776	7.30315	7.70922	7.80216	7.83347	7.31448	7.73192
Ubtf	ENSMUSG00000020923	ENSMUSG00000020923	0.13297	0.921466	0.166471	0.993883	0.12112	0.93969	0.175803	0.967914		8.12868	8.41026	8.46712	8.21116	8.10475	8.20208	8.43032	8.07533	8.15286	8.38882	8.21227	7.91757	8.32148	7.95412	8.34424
Riok3	ENSMUSG00000024404	ENSMUSG00000024404	0.234652	0.810534	0.0422873	0.995681	0.273481	0.70591	0.193305	0.967914		7.86408	8.13937	8.16461	8.15845	7.50747	7.86937	7.84956	7.75051	7.79304	7.94032	8.0036	8.12392	7.82093	7.81724	7.87162
Col12a1	ENSMUSG00000032332	ENSMUSG00000032332	-0.320224	0.715604	-0.375026	0.721947	-0.175933	0.902465	-0.366924	0.766588		7.61278	7.67151	7.91936	8.15461	8.20895	7.95229	7.86809	7.54396	8.26514	7.97817	8.07986	8.27586	8.17148	7.88433	8.12161
Wwp2	ENSMUSG00000031930	ENSMUSG00000031930	-0.399531	0.37823	-0.23145	0.921832	-0.319671	0.57192	-0.268715	0.884634		8.19129	8.21201	7.87764	8.44603	8.4018	8.20728	8.43032	8.34028	8.44928	8.24982	8.19865	8.4899	8.33477	8.74656	8.33462
Gm11822	ENSMUSG00000082255	ENSMUSG00000082255	-0.0935839	0.974632	-0.000348203	0.999777	0.141492	0.956203	-0.190694	0.98912		7.8726	7.78841	7.94383	8.04689	8.08182	8.0482	7.79248	8.0917	7.16249	7.91266	7.85525	7.84653	8.51298	7.842	7.25876
Cx3cl1	ENSMUSG00000031778	ENSMUSG00000031778	0.122473	0.951761	-0.0302848	0.995681	-0.143641	0.93969	-0.331393	0.925538		7.50735	7.77975	8.10076	8.13136	7.98628	8.32206	7.88639	8.05321	7.96008	7.74711	7.91198	7.90364	7.8886	7.08484	7.99287
Zswim6	ENSMUSG00000032846	ENSMUSG00000032846	-0.122185	0.926242	0.191072	0.98619	-0.0339146	0.988899	0.0976495	0.990293		8.99114	8.85582	8.50871	8.74051	8.67123	8.66989	8.65329	8.89463	8.91441	8.63889	8.66597	8.4992	8.65754	9.21541	8.8045
Mast4	ENSMUSG00000034751	ENSMUSG00000034751	0.219433	0.812248	0.0454487	0.995681	0.350238	0.48347	0.386254	0.60923		7.97897	8.43806	8.32843	8.00486	7.70796	7.91461	8.01947	7.94324	7.78622	8.31467	8.31261	8.02013	7.9985	8.04222	8.10472
2810004N23Rik	ENSMUSG00000031984	ENSMUSG00000031984	-0.065094	0.961849	0.0802676	0.995681	0.0765369	0.954502	0.0860466	0.990293		9.01826	8.8434	8.75442	8.72247	8.83445	8.80301	8.81168	8.8015	8.77309	8.77107	9.02611	8.54479	8.90042	8.99029	8.91522
Nfatc3	ENSMUSG00000031902	ENSMUSG00000031902	-0.111809	0.956106	-0.344803	0.849265	-0.217138	0.870447	-0.320081	0.927156		7.60258	7.61418	8.05283	8.03858	8.18225	8.07121	8.22036	8.05321	7.65746	8.27611	8.02433	8.05417	8.09541	7.38356	8.09335
Arid1a	ENSMUSG00000007880	ENSMUSG00000007880	-0.0410864	0.991488	-0.0673457	0.995681	0.0221533	0.989428	-0.182446	0.9781		7.61278	7.66211	8.09713	8.20375	7.79512	7.95847	8.01947	7.68009	7.66492	8.02543	7.8022	7.82205	8.04777	7.52022	7.96194
Nfe2l1	ENSMUSG00000038615	ENSMUSG00000038615	0.193849	0.856274	0.34981	0.678754	0.176754	0.865596	0.318745	0.780388		8.21827	8.01939	8.38611	8.07966	7.67003	7.93357	8.0737	8.14496	7.91697	8.03059	7.76572	7.82698	8.19597	7.82968	8.04693
Elp2	ENSMUSG00000024271	ENSMUSG00000024271	-0.000248512	0.999747	-0.140637	0.995681	-0.0355774	0.988899	-0.268758	0.932265		8.29631	8.14613	8.13658	8.44603	8.69031	8.19686	8.34468	8.11324	8.21518	8.41665	8.39055	8.17894	8.52076	7.89028	8.09335
Nip7	ENSMUSG00000031917	ENSMUSG00000031917	0.361003	0.836523	0.196197	0.995681	0.518883	0.639706	0.235687	0.98319		6.81984	7.04869	8.08618	7.0397	7.16972	7.4273	7.03608	6.81699	6.97108	7.23331	7.40369	7.12458	7.49751	6.6387	7.02735
Cnih1	ENSMUSG00000015759	ENSMUSG00000015759	0.020309	0.993093	0.00173027	0.99964	0.119816	0.93837	-0.0845401	0.990293		7.98683	8.01201	8.26188	8.17371	8.13847	8.23812	7.88032	8.29387	7.70891	8.05609	7.99311	8.23193	8.13141	8.08951	8.01715
Use1	ENSMUSG00000002395	ENSMUSG00000002395	-0.0522142	0.977398	0.124357	0.995681	0.0641624	0.968258	0.0636005	0.990293		8.99114	8.95919	8.60134	8.71728	8.83787	8.81669	8.72283	9.01967	8.59312	8.78334	8.55278	8.83638	8.86725	9.015	8.82528
Vamp3	ENSMUSG00000028955	ENSMUSG00000028955	-0.188707	0.845339	0.00781073	0.995681	-0.117837	0.936148	0.0935958	0.990293		8.23818	8.19256	8.40972	8.12745	8.27614	8.18636	8.5229	8.48776	8.17915	8.47834	8.17102	8.17508	8.28084	8.68973	8.42358
Col5a3	ENSMUSG00000004098	ENSMUSG00000004098	0.409316	0.741211	0.0923366	0.995681	0.807285	0.126205	0.79099	0.258346		7.27012	6.84782	8.00712	6.68251	6.74262	6.70075	6.60649	6.9665	6.45557	7.36161	7.42724	7.36723	6.80224	7.26041	7.1311
Snx12	ENSMUSG00000046032	ENSMUSG00000046032	0.179195	0.894787	0.312144	0.837499	0.19674	0.861095	0.110966	0.990293		9.0894	9.33532	8.62927	8.87259	8.91449	9.00176	8.68848	8.99667	8.83394	8.78029	8.77399	8.63469	8.92406	9.11995	8.46389
Flrt2	ENSMUSG00000047414	ENSMUSG00000047414	-0.0889729	0.961849	-0.27324	0.914533	-0.138202	0.936562	-0.313527	0.883109		7.65289	7.74456	8.1116	8.20375	8.31106	7.97687	8.23472	7.70158	8.00781	8.24539	8.22128	7.9083	8.00959	7.76642	8.05868
Foxn3	ENSMUSG00000033713	ENSMUSG00000033713	-0.389188	0.435518	-0.14575	0.995681	-0.388223	0.392224	-0.346681	0.746342		8.01788	8.13937	7.85201	8.52844	8.22995	8.23812	8.28616	8.38966	8.47072	8.05609	8.16169	8.20946	8.11609	8.65173	8.33462
Prpf6	ENSMUSG00000002455	ENSMUSG00000002455	-0.17631	0.862739	-0.156689	0.993883	-0.0860254	0.956453	0.0128607	0.994468		8.67789	8.52875	8.23238	8.53141	8.42931	8.44168	8.34026	8.69838	8.63931	8.61848	8.66927	8.6234	8.51298	8.89295	8.52865
Sh3pxd2b	ENSMUSG00000040711	ENSMUSG00000040711	-0.0453982	0.984235	-0.105202	0.995681	-0.0454997	0.985028	-0.194878	0.967914		7.85551	7.86413	8.32533	8.1775	8.34033	8.20208	7.91043	8.23614	8.11522	8.21853	8.157	8.07917	8.06382	8.04222	8.17114
Atxn10	ENSMUSG00000016541	ENSMUSG00000016541	-0.0676657	0.961849	-0.0952872	0.995681	-0.258713	0.613562	-0.0757429	0.990293		8.843	8.57955	8.55709	8.66426	8.65967	8.87671	8.79241	8.94655	9.0054	8.81954	8.86302	8.57147	8.64336	8.82317	8.71086
Tcf19	ENSMUSG00000050410	ENSMUSG00000050410	-0.231535	0.788125	-0.310124	0.72441	-0.257645	0.69212	-0.244336	0.925538		7.7299	7.8723	8.03015	8.1963	8.14954	8.04239	8.34026	8.08626	7.98414	8.18193	8.02433	8.35989	8.21527	8.07914	8.05868
Gtpbp1	ENSMUSG00000042535	ENSMUSG00000042535	-0.0711595	0.963295	0.0320013	0.995681	-0.0217747	0.989047	0.125183	0.983741		8.94747	8.85169	8.57287	8.65613	8.72402	8.62393	8.58771	8.88214	8.94844	8.87219	8.7524	8.65146	8.90636	9.04196	8.60271
Ddx46	ENSMUSG00000021500	ENSMUSG00000021500	-0.183153	0.835561	-0.286822	0.7123	-0.167671	0.840213	0.216587	0.939045		8.26431	8.32946	8.10076	8.03022	7.96764	8.04239	8.23947	8.38524	8.54135	8.54831	8.45306	8.52975	8.20565	8.56516	8.43264
Zwint	ENSMUSG00000019923	ENSMUSG00000019923	0.224218	0.915114	0.0367697	0.995681	0.235567	0.915628	0.0729124	0.992218		7.35766	7.07725	8.10438	7.33258	7.63107	7.59548	7.58406	7.19581	7.28377	7.49443	7.61666	7.56312	7.87046	6.69414	7.32833
B230219D22Rik	ENSMUSG00000045767	ENSMUSG00000045767	-0.222578	0.795016	-0.127295	0.995681	-0.190844	0.829701	-0.211233	0.95908		8.38232	8.7084	8.27157	8.73023	8.72771	8.53568	8.63897	8.65498	8.65064	8.7649	8.60533	8.36329	8.81761	8.67603	8.52865
Spr	ENSMUSG00000033735	ENSMUSG00000033735	0.0962897	0.965879	0.394424	0.837499	-0.0085522	0.996577	0.373218	0.920649		9.68782	9.5026	8.37115	8.81294	9.03875	8.88647	9.14884	9.36765	9.35595	9.00648	8.90555	8.76112	9.07693	9.45091	8.99989
Fam133b	ENSMUSG00000058503	ENSMUSG00000058503	0.00869638	0.995885	-0.158691	0.993883	-0.0545793	0.981162	0.183565	0.967914		8.32141	8.4761	8.22242	8.16228	8.266	8.03655	8.56895	8.41156	8.16869	8.49708	8.44923	8.53879	8.06914	8.53131	8.35381
Klhdc2	ENSMUSG00000020978	ENSMUSG00000020978	-0.0450442	0.977453	0.0536182	0.995681	-0.0857283	0.944146	0.0658579	0.990293		8.42348	8.63344	8.48945	8.5549	8.47402	8.3076	8.53455	8.56404	8.70232	8.55549	8.43769	8.39683	8.5815	8.65871	8.43264
Ddah1	ENSMUSG00000028194	ENSMUSG00000028194	-0.216547	0.842331	-0.150187	0.995681	-0.0805332	0.968258	-0.0639542	0.992218		7.83822	7.82255	8.23238	8.11959	7.95507	8.07121	8.21071	7.97888	8.00193	8.09107	8.21678	8.09969	7.91834	8.08951	8.53286
Mrpl20	ENSMUSG00000029066	ENSMUSG00000029066	-0.080311	0.965879	0.0761973	0.995681	0.0131426	0.994893	0.112797	0.990293		7.75776	7.7085	8.32222	7.91239	7.68532	7.97076	8.00279	8.01938	7.85308	7.94579	8.014	7.72504	8.15158	7.82968	8.15482
Rpl7l1	ENSMUSG00000063888	ENSMUSG00000063888	0.160597	0.894787	0.179845	0.993883	0.194217	0.840213	0.378662	0.680012		8.01788	8.38763	8.39796	8.00486	7.96137	7.74608	8.12598	8.19632	7.94176	8.20947	8.18029	7.91757	8.34795	8.00434	7.99287
Ftsj3	ENSMUSG00000020706	ENSMUSG00000020706	0.0632829	0.96962	-0.0892826	0.995681	0.193156	0.839585	0.217097	0.962805		8.55628	8.86404	8.41848	8.27974	8.42019	8.51064	8.37524	8.44167	8.46646	8.74621	8.89995	8.44572	8.43282	8.74984	8.46389
Eef1a1	ENSMUSG00000037742	ENSMUSG00000037742	0.174018	0.928584	0.296085	0.961861	0.212166	0.908359	0.526048	0.696296		9.24509	9.09459	8.37715	8.47403	8.49587	8.29787	8.69887	8.61023	8.88595	8.65567	9.09144	8.02443	8.61094	8.61269	9.0537
Imp3	ENSMUSG00000032288	ENSMUSG00000032288	0.122082	0.915114	0.0711272	0.995681	0.0749415	0.959864	0.186227	0.966979		8.73505	8.61894	8.59621	8.32143	8.60844	8.45923	8.58397	8.80481	8.28948	8.6355	8.6326	8.46482	8.63622	8.56516	8.36804
Xpo1	ENSMUSG00000020290	ENSMUSG00000020290	-0.0237078	0.992047	-0.0471994	0.995681	0.0277038	0.988899	-0.114176	0.98912		8.32141	8.40464	8.35604	8.41748	8.71659	8.25329	8.36657	8.43313	8.18954	8.35633	8.44155	8.42311	8.48543	8.44101	8.20852
[truncated: 55,286 more rows]

## Sheet: 24h
symbol	ensembl_ID	User_ID	CTR_24h_A-CBD00325_24h_A_log2FC	CTR_24h_A-CBD00325_24h_A_adjPval	CTR_24h_A-CBD075_24h_A_log2FC	CTR_24h_A-CBD075_24h_A_adjPval	CTR_24h_A-CBD15_24h_A_log2FC	CTR_24h_A-CBD15_24h_A_adjPval	CTR_24h_A-CBD3_24h_A_log2FC	CTR_24h_A-CBD3_24h_A_adjPval	Processed data:	CBD3_24h_A16	CBD3_24h_A17	CBD3_24h_A18	CBD15_24h_A19	CBD15_24h_A20	CBD15_24h_A21	CBD075_24h_A22	CBD075_24h_A23	CBD075_24h_A24	CBD00325_24h_A25	CBD00325_24h_A26	CBD00325_24h_A27	CTR_24h_A28	CTR_24h_A29	CTR_24h_A30
[truncated: 56,943 more rows]

[truncated: 2 more sheets: 6h regulation, 24h regulation]
