# Supplementary material for: Elucidating the transcriptomic response of adult-derived mHypoA-2/12 mouse hypothalamic neuron cell line to cannabidiol (CBD) exposure
Source: J Appl Genet. 2025 May 8;66(4):1029–51. doi: 10.1007/s13353-025-00970-8 (PMC12605594; doi:10.1007/s13353-025-00970-8)
Supplement: Supplementary file 4 — Supplementary file4 Comparative analysis for genes affected by different CBD concentrations and differ treatment times (including altered genes annotations) (XLSX 24 KB) [file 13353_2025_970_MOESM4_ESM.xlsx]

## Sheet: 6h
Treatment	No of genes	Gene ID	Symbol	Type	Description
CBD_0.325 CBD_0.75 CBD_1.5 CBD_3	6	ENSMUSG00000043613	Mmp3	protein_coding	matrix metallopeptidase 3 [Source:MGI Symbol
		ENSMUSG00000001131	Timp1	protein_coding	tissue inhibitor of metalloproteinase 1 [Source:MGI Symbol
		ENSMUSG00000005125	Ndrg1	protein_coding	N-myc downstream regulated gene 1 [Source:MGI Symbol
		ENSMUSG00000015837	Sqstm1	protein_coding	sequestosome 1 [Source:MGI Symbol
		ENSMUSG00000090272	Mndal	protein_coding	myeloid nuclear differentiation antigen like [Source:MGI Symbol
		ENSMUSG00000023067	Cdkn1a	protein_coding	cyclin-dependent kinase inhibitor 1A (P21) [Source:MGI Symbol
CBD_0.325 CBD_0.75 CBD_1.5	4	ENSMUSG00000030432	Rpl28	protein_coding	ribosomal protein L28 [Source:MGI Symbol
		ENSMUSG00000022528	Hes1	protein_coding	hes family bHLH transcription factor 1 [Source:MGI Symbol
		ENSMUSG00000022856	Tmem41a	protein_coding	transmembrane protein 41a [Source:MGI Symbol
		ENSMUSG00000059187	Tafa1	protein_coding	TAFA chemokine like family member 1 [Source:MGI Symbol
CBD_0.325 CBD_0.75 CBD_3	3	ENSMUSG00000040435	Ppp1r15a	protein_coding	protein phosphatase 1, regulatory subunit 15A [Source:MGI Symbol
		ENSMUSG00002076161	Rn7sk	misc_RNA	RNA, 7SK, nuclear [Source:MGI Symbol
		ENSMUSG00000120645		lncRNA	novel transcript
CBD_0.325 CBD_1.5 CBD_3	4	ENSMUSG00000052837	Junb	protein_coding	jun B proto-oncogene [Source:MGI Symbol
		ENSMUSG00000000078	Klf6	protein_coding	Kruppel-like factor 6 [Source:MGI Symbol
		ENSMUSG00000005413	Hmox1	protein_coding	heme oxygenase 1 [Source:MGI Symbol
		ENSMUSG00000026981	Il1rn	protein_coding	interleukin 1 receptor antagonist [Source:MGI Symbol
CBD_0.75 CBD_1.5 CBD_3	1	ENSMUSG00000055435	Maf	protein_coding	avian musculoaponeurotic fibrosarcoma oncogene homolog [Source:MGI Symbol
CBD_0.325 CBD_0.75	7	ENSMUSG00000117521	Gm50024	lncRNA	predicted gene, 50024 [Source:MGI Symbol
		ENSMUSG00000058833	Rex1bd	protein_coding	required for excision 1-B domain containing [Source:MGI Symbol
		ENSMUSG00000002083	Bbc3	protein_coding	BCL2 binding component 3 [Source:MGI Symbol
		ENSMUSG00000083716	Gm13436	processed_pseudogene	predicted gene 13436 [Source:MGI Symbol
		ENSMUSG00000041827	Oasl1	protein_coding	2'-5' oligoadenylate synthetase-like 1 [Source:MGI Symbol
		ENSMUSG00000023034	Nr4a1	protein_coding	nuclear receptor subfamily 4, group A, member 1 [Source:MGI Symbol
		ENSMUSG00000028972	Car6	protein_coding	carbonic anhydrase 6 [Source:MGI Symbol
CBD_0.325 CBD_1.5	9	ENSMUSG00000008348	Ubc	protein_coding	ubiquitin C [Source:MGI Symbol
		ENSMUSG00000033307	Mif	protein_coding	macrophage migration inhibitory factor (glycosylation-inhibiting factor) [Source:MGI Symbol
		ENSMUSG00000024925	Rnaseh2c	protein_coding	ribonuclease H2, subunit C [Source:MGI Symbol
		ENSMUSG00000007480	Mc5r	protein_coding	melanocortin 5 receptor [Source:MGI Symbol
		ENSMUSG00000039316	Rftn1	protein_coding	raftlin lipid raft linker 1 [Source:MGI Symbol
		ENSMUSG00000004891	Nes	protein_coding	nestin [Source:MGI Symbol
		ENSMUSG00000020184	Mdm2	protein_coding	transformed mouse 3T3 cell double minute 2 [Source:MGI Symbol
		ENSMUSG00000058135	Gstm1	protein_coding	glutathione S-transferase, mu 1 [Source:MGI Symbol
		ENSMUSG00000031827	Cotl1	protein_coding	coactosin-like 1 (Dictyostelium) [Source:MGI Symbol
CBD_0.325 CBD_3	1	ENSMUSG00000021701	Plk2	protein_coding	polo like kinase 2 [Source:MGI Symbol
CBD_0.75 CBD_3	3	ENSMUSG00000030218	Mgp	protein_coding	matrix Gla protein [Source:MGI Symbol
		ENSMUSG00000003363	Pld3	protein_coding	phospholipase D family, member 3 [Source:MGI Symbol
		ENSMUSG00000062997	Rpl35	protein_coding	ribosomal protein L35 [Source:MGI Symbol
CBD_1.5 CBD_3	5	ENSMUSG00000074578	Zfas1	lncRNA	zinc finger, NFX1-type containing 1, antisense RNA 1 [Source:MGI Symbol
		ENSMUSG00000035413	Tmem98	protein_coding	transmembrane protein 98 [Source:MGI Symbol
		ENSMUSG00000028494	Plin2	protein_coding	perilipin 2 [Source:MGI Symbol
		ENSMUSG00000041313	Slc7a1	protein_coding	solute carrier family 7 (cationic amino acid transporter, y+ system), member 1 [Source:MGI Symbol
		ENSMUSG00000075324	Fign	protein_coding	fidgetin [Source:MGI Symbol
CBD_0.325	35	ENSMUSG00000035692	Isg15	protein_coding	ISG15 ubiquitin-like modifier [Source:MGI Symbol
		ENSMUSG00000042473	Tbc1d8b	protein_coding	TBC1 domain family, member 8B [Source:MGI Symbol
		ENSMUSG00000064080	Fbln2	protein_coding	fibulin 2 [Source:MGI Symbol
		ENSMUSG00000117407	Gm7720	transcribed_processed_pseudogene	predicted gene 7720 [Source:MGI Symbol
		ENSMUSG00000067847	Romo1	protein_coding	reactive oxygen species modulator 1 [Source:MGI Symbol
		ENSMUSG00000040824	Snrpd2	protein_coding	small nuclear ribonucleoprotein D2 [Source:MGI Symbol
		ENSMUSG00000032518	Rpsa	protein_coding	ribosomal protein SA [Source:MGI Symbol
		ENSMUSG00000071547	Nt5dc2	protein_coding	5'-nucleotidase domain containing 2 [Source:MGI Symbol
		ENSMUSG00000027966	Col11a1	protein_coding	collagen, type XI, alpha 1 [Source:MGI Symbol
		ENSMUSG00000034459	Ifit1	protein_coding	interferon-induced protein with tetratricopeptide repeats 1 [Source:MGI Symbol
		ENSMUSG00000092746	Rn7s6	misc_RNA	7S RNA 6 [Source:MGI Symbol
		ENSMUSG00000047557	Lxn	protein_coding	latexin [Source:MGI Symbol
		ENSMUSG00000021453	Gadd45g	protein_coding	growth arrest and DNA-damage-inducible 45 gamma [Source:MGI Symbol
		ENSMUSG00000029561	Oasl2	protein_coding	2'-5' oligoadenylate synthetase-like 2 [Source:MGI Symbol
		ENSMUSG00000025792	Slc25a10	protein_coding	solute carrier family 25 (mitochondrial carrier, dicarboxylate transporter), member 10 [Source:MGI Symbol
		ENSMUSG00000027803	Wwtr1	protein_coding	WW domain containing transcription regulator 1 [Source:MGI Symbol
		ENSMUSG00000032271	Nnmt	protein_coding	nicotinamide N-methyltransferase [Source:MGI Symbol
		ENSMUSG00000025232	Hexa	protein_coding	hexosaminidase A [Source:MGI Symbol
		ENSMUSG00000092805	Gm26461	misc_RNA	predicted gene, 26461 [Source:MGI Symbol
		ENSMUSG00000019738	Polr2i	protein_coding	polymerase (RNA) II (DNA directed) polypeptide I [Source:MGI Symbol
		ENSMUSG00000024190	Dusp1	protein_coding	dual specificity phosphatase 1 [Source:MGI Symbol
		ENSMUSG00000014846	Tppp3	protein_coding	tubulin polymerization-promoting protein family member 3 [Source:MGI Symbol
		ENSMUSG00000108649	Gm44855	processed_pseudogene	predicted gene 44855 [Source:MGI Symbol
		ENSMUSG00000057863	Rpl36	protein_coding	ribosomal protein L36 [Source:MGI Symbol
		ENSMUSG00000085156	Snhg15	lncRNA	small nucleolar RNA host gene 15 [Source:MGI Symbol
		ENSMUSG00000025651	Uqcrc1	protein_coding	ubiquinol-cytochrome c reductase core protein 1 [Source:MGI Symbol
		ENSMUSG00000033684	Qsox1	protein_coding	quiescin Q6 sulfhydryl oxidase 1 [Source:MGI Symbol
		ENSMUSG00000074247	Dda1	protein_coding	DET1 and DDB1 associated 1 [Source:MGI Symbol
		ENSMUSG00000031757	Mt4	protein_coding	metallothionein 4 [Source:MGI Symbol
		ENSMUSG00000023004	Tuba1b	protein_coding	tubulin, alpha 1B [Source:MGI Symbol
		ENSMUSG00000032194	Kank2	protein_coding	KN motif and ankyrin repeat domains 2 [Source:MGI Symbol
		ENSMUSG00000032402	Smad3	protein_coding	SMAD family member 3 [Source:MGI Symbol
		ENSMUSG00000022557	Bop1	protein_coding	block of proliferation 1 [Source:MGI Symbol
		ENSMUSG00000001750	Tcirg1	protein_coding	T cell, immune regulator 1, ATPase, H+ transporting, lysosomal V0 protein A3 [Source:MGI Symbol
		ENSMUSG00000029394	Cdk2ap1	protein_coding	CDK2 (cyclin-dependent kinase 2)-associated protein 1 [Source:MGI Symbol
CBD_0.75	25	ENSMUSG00000116673	A630089N07Rik	protein_coding	RIKEN cDNA A630089N07 gene [Source:MGI Symbol
		ENSMUSG00000074415	Mir100hg	lncRNA	Mir100 Mirlet7a-2 Mir125b-1 cluster host gene [Source:MGI Symbol
		ENSMUSG00000003617	Cp	protein_coding	ceruloplasmin [Source:MGI Symbol
		ENSMUSG00000032253	Phip	protein_coding	pleckstrin homology domain interacting protein [Source:MGI Symbol
		ENSMUSG00000025648	Pfkfb4	protein_coding	6-phosphofructo-2-kinase/fructose-2,6-biphosphatase 4 [Source:MGI Symbol
		ENSMUSG00000052684	Jun	protein_coding	jun proto-oncogene [Source:MGI Symbol
		ENSMUSG00000041891	Lman1	protein_coding	lectin, mannose-binding, 1 [Source:MGI Symbol
		ENSMUSG00000009630	Ppp2cb	protein_coding	protein phosphatase 2 (formerly 2A), catalytic subunit, beta isoform [Source:MGI Symbol
		ENSMUSG00000090386	Mir99ahg	lncRNA	Mir99a and Mirlet7c-1 host gene (non-protein coding) [Source:MGI Symbol
		ENSMUSG00000045328	Cenpe	protein_coding	centromere protein E [Source:MGI Symbol
		ENSMUSG00000028364	Tnc	protein_coding	tenascin C [Source:MGI Symbol
		ENSMUSG00000023885	Thbs2	protein_coding	thrombospondin 2 [Source:MGI Symbol
		ENSMUSG00000051341	Zfp52	protein_coding	zinc finger protein 52 [Source:MGI Symbol
		ENSMUSG00000024290	Rock1	protein_coding	Rho-associated coiled-coil containing protein kinase 1 [Source:MGI Symbol
		ENSMUSG00000076431	Sox4	protein_coding	SRY (sex determining region Y)-box 4 [Source:MGI Symbol
		ENSMUSG00000031229	Atrx	protein_coding	ATRX, chromatin remodeler [Source:MGI Symbol
		ENSMUSG00000023921	Mmut	protein_coding	methylmalonyl-Coenzyme A mutase [Source:MGI Symbol
		ENSMUSG00000007682	Dio2	protein_coding	deiodinase, iodothyronine, type II [Source:MGI Symbol
		ENSMUSG00000050578	Mmp13	protein_coding	matrix metallopeptidase 13 [Source:MGI Symbol
		ENSMUSG00000034349	Smc4	protein_coding	structural maintenance of chromosomes 4 [Source:MGI Symbol
		ENSMUSG00000022048	Dpysl2	protein_coding	dihydropyrimidinase-like 2 [Source:MGI Symbol
		ENSMUSG00000026360	Rgs2	protein_coding	regulator of G-protein signaling 2 [Source:MGI Symbol
		ENSMUSG00000003545	Fosb	protein_coding	FBJ osteosarcoma oncogene B [Source:MGI Symbol
		ENSMUSG00000026740	Dnajc1	protein_coding	DnaJ heat shock protein family (Hsp40) member C1 [Source:MGI Symbol
		ENSMUSG00000042133	Ppig	protein_coding	peptidyl-prolyl isomerase G (cyclophilin G) [Source:MGI Symbol
CBD_1.5	24	ENSMUSG00000026478	Lamc1	protein_coding	laminin, gamma 1 [Source:MGI Symbol
		ENSMUSG00000024843	Chka	protein_coding	choline kinase alpha [Source:MGI Symbol
		ENSMUSG00000036880	Acaa2	protein_coding	acetyl-Coenzyme A acyltransferase 2 (mitochondrial 3-oxoacyl-Coenzyme A thiolase) [Source:MGI Symbol
		ENSMUSG00000056708	Ier5	protein_coding	immediate early response 5 [Source:MGI Symbol
		ENSMUSG00000038418	Egr1	protein_coding	early growth response 1 [Source:MGI Symbol
		ENSMUSG00000024953	Prdx5	protein_coding	peroxiredoxin 5 [Source:MGI Symbol
		ENSMUSG00000029377	Ereg	protein_coding	epiregulin [Source:MGI Symbol
		ENSMUSG00000101609	Kcnq1ot1	lncRNA	KCNQ1 overlapping transcript 1 [Source:MGI Symbol
		ENSMUSG00000108414	Snhg1	lncRNA	small nucleolar RNA host gene 1 [Source:MGI Symbol
		ENSMUSG00000056749	Nfil3	protein_coding	nuclear factor, interleukin 3, regulated [Source:MGI Symbol
		ENSMUSG00000033159	Cnppd1	protein_coding	cyclin Pas1/PHO80 domain containing 1 [Source:MGI Symbol
		ENSMUSG00000040026	Saa3	protein_coding	serum amyloid A 3 [Source:MGI Symbol
		ENSMUSG00000025289	Prdx4	protein_coding	peroxiredoxin 4 [Source:MGI Symbol
		ENSMUSG00000096210	H1f0	protein_coding	H1.0 linker histone [Source:MGI Symbol
		ENSMUSG00000001627	Ifrd1	protein_coding	interferon-related developmental regulator 1 [Source:MGI Symbol
		ENSMUSG00000029163	Emilin1	protein_coding	elastin microfibril interfacer 1 [Source:MGI Symbol
		ENSMUSG00000054836	Elp6	protein_coding	elongator acetyltransferase complex subunit 6 [Source:MGI Symbol
		ENSMUSG00000037379	Spon2	protein_coding	spondin 2, extracellular matrix protein [Source:MGI Symbol
		ENSMUSG00000050552	Lamtor4	protein_coding	late endosomal/lysosomal adaptor, MAPK and MTOR activator 4 [Source:MGI Symbol
		ENSMUSG00000039883	Lrrc17	protein_coding	leucine rich repeat containing 17 [Source:MGI Symbol
		ENSMUSG00000027111	Itga6	protein_coding	integrin alpha 6 [Source:MGI Symbol
		ENSMUSG00000033788	Dysf	protein_coding	dysferlin [Source:MGI Symbol
		ENSMUSG00000048772	Tmem53	protein_coding	transmembrane protein 53 [Source:MGI Symbol
		ENSMUSG00000021250	Fos	protein_coding	FBJ osteosarcoma oncogene [Source:MGI Symbol
CBD_3	14	ENSMUSG00000042284	Itga1	protein_coding	integrin alpha 1 [Source:MGI Symbol
		ENSMUSG00000042406	Atf4	protein_coding	activating transcription factor 4 [Source:MGI Symbol
		ENSMUSG00000035783	Acta2	protein_coding	actin alpha 2, smooth muscle, aorta [Source:MGI Symbol
		ENSMUSG00000003541	Ier3	protein_coding	immediate early response 3 [Source:MGI Symbol
		ENSMUSG00000021186	Fbln5	protein_coding	fibulin 5 [Source:MGI Symbol
		ENSMUSG00000032363	Adamts7	protein_coding	a disintegrin-like and metallopeptidase (reprolysin type) with thrombospondin type 1 motif, 7 [Source:MGI Symbol
		ENSMUSG00000032501	Trib1	protein_coding	tribbles pseudokinase 1 [Source:MGI Symbol
		ENSMUSG00000038508	Gdf15	protein_coding	growth differentiation factor 15 [Source:MGI Symbol
		ENSMUSG00000022816	Fstl1	protein_coding	follistatin-like 1 [Source:MGI Symbol
		ENSMUSG00000017493	Igfbp4	protein_coding	insulin-like growth factor binding protein 4 [Source:MGI Symbol
		ENSMUSG00000111415	Gm39325	lncRNA	predicted gene, 39325 [Source:MGI Symbol
		ENSMUSG00000022817	Itgb5	protein_coding	integrin beta 5 [Source:MGI Symbol
		ENSMUSG00000073489	Ifi204	protein_coding	interferon activated gene 204 [Source:MGI Symbol
		ENSMUSG00000030717	Nupr1	protein_coding	nuclear protein transcription regulator 1 [Source:MGI Symbol

## Sheet: 24h
Treatment	No of genes	Gene ID	Symbol	Type	Description
CBD_0.325 CBD_0.75 CBD_1.5 CBD_3	1	ENSMUSG00000022836	Mylk	protein_coding	myosin, light polypeptide kinase
CBD_0.325 CBD_0.75 CBD_1.5	9	ENSMUSG00000061353	Cxcl12	protein_coding	chemokine (C-X-C motif) ligand 12 [Source:MGI Symbol
		ENSMUSG00000024190	Dusp1	protein_coding	dual specificity phosphatase 1 [Source:MGI Symbol
		ENSMUSG00000050578	Mmp13	protein_coding	matrix metallopeptidase 13 [Source:MGI Symbol
		ENSMUSG00000026620	Mark1	protein_coding	MAP/microtubule affinity regulating kinase 1 [Source:MGI Symbol
		ENSMUSG00000032531	Amotl2	protein_coding	angiomotin-like 2 [Source:MGI Symbol
		ENSMUSG00000038530	Rgs4	protein_coding	regulator of G-protein signaling 4 [Source:MGI Symbol
		ENSMUSG00000022330	Osr2	protein_coding	odd-skipped related 2 [Source:MGI Symbol
		ENSMUSG00000026981	Il1rn	protein_coding	interleukin 1 receptor antagonist [Source:MGI Symbol
		ENSMUSG00000040026	Saa3	protein_coding	serum amyloid A 3 [Source:MGI Symbol
CBD_0.75 CBD_1.5 CBD_3	2	ENSMUSG00000086503	Xist	lncRNA	inactive X specific transcripts [Source:MGI Symbol
		ENSMUSG00000054836	Elp6	protein_coding	elongator acetyltransferase complex subunit 6 [Source:MGI Symbol
CBD_0.325 CBD_0.75	3	ENSMUSG00000032714	Syde1	protein_coding	synapse defective 1, Rho GTPase, homolog 1 (C. elegans) [Source:MGI Symbol
		ENSMUSG00000026822	Lcn2	protein_coding	lipocalin 2 [Source:MGI Symbol
		ENSMUSG00000036820	Amdhd2	protein_coding	amidohydrolase domain containing 2 [Source:MGI Symbol
CBD_0.325 CBD_1.5	1	ENSMUSG00000030246	Ldhb	protein_coding	lactate dehydrogenase B [Source:MGI Symbol
CBD_0.75 CBD_1.5	6	ENSMUSG00000064339	mt-Rnr2	Mt_rRNA	mitochondrially encoded 16S rRNA [Source:MGI Symbol
		ENSMUSG00000021567	Nkd2	protein_coding	naked cuticle 2 [Source:MGI Symbol
		ENSMUSG00000036904	Fzd8	protein_coding	frizzled class receptor 8 [Source:MGI Symbol
		ENSMUSG00000064337	mt-Rnr1	Mt_rRNA	mitochondrially encoded 12S rRNA [Source:MGI Symbol
		ENSMUSG00000057534	Elobl	protein_coding	elongin B-like [Source:MGI Symbol
		ENSMUSG00000026749	Nek6	protein_coding	NIMA (never in mitosis gene a)-related expressed kinase 6 [Source:MGI Symbol
CBD_0.75 CBD_3	3	ENSMUSG00000048546	Tob2	protein_coding	transducer of ERBB2, 2 [Source:MGI Symbol
		ENSMUSG00000027447	Cst3	protein_coding	cystatin C [Source:MGI Symbol
		ENSMUSG00000039680	Mrps6	protein_coding	mitochondrial ribosomal protein S6 [Source:MGI Symbol
CBD_0.325	16	ENSMUSG00000064367	mt-Nd5	protein_coding	mitochondrially encoded NADH dehydrogenase 5 [Source:MGI Symbol
		ENSMUSG00000112099	Gm8960	processed_pseudogene	predicted gene 8960 [Source:MGI Symbol
		ENSMUSG00000038848	Ythdf1	protein_coding	YTH N6-methyladenosine RNA binding protein 1 [Source:MGI Symbol
		ENSMUSG00000078193	Gm2000	protein_coding	predicted gene 2000 [Source:MGI Symbol
		ENSMUSG00000060591	Ifitm2	protein_coding	interferon induced transmembrane protein 2 [Source:MGI Symbol
		ENSMUSG00000061315	Naca	protein_coding	nascent polypeptide-associated complex alpha polypeptide [Source:MGI Symbol
		ENSMUSG00000040459	Arglu1	protein_coding	arginine and glutamate rich 1 [Source:MGI Symbol
		ENSMUSG00000070934	Rraga	protein_coding	Ras-related GTP binding A [Source:MGI Symbol
		ENSMUSG00000029455	Aldh2	protein_coding	aldehyde dehydrogenase 2, mitochondrial [Source:MGI Symbol
		ENSMUSG00000064363	mt-Nd4	protein_coding	mitochondrially encoded NADH dehydrogenase 4 [Source:MGI Symbol
		ENSMUSG00000040097	Flywch1	protein_coding	FLYWCH-type zinc finger 1 [Source:MGI Symbol
		ENSMUSG00000020440	Arf5	protein_coding	ADP-ribosylation factor 5 [Source:MGI Symbol
		ENSMUSG00000030551	Nr2f2	protein_coding	nuclear receptor subfamily 2, group F, member 2 [Source:MGI Symbol
		ENSMUSG00000001829	Clpb	protein_coding	ClpB caseinolytic peptidase B [Source:MGI Symbol
		ENSMUSG00000022206	Npr3	protein_coding	natriuretic peptide receptor 3 [Source:MGI Symbol
		ENSMUSG00000058905	Gm10051	processed_pseudogene	predicted pseudogene 10051 [Source:MGI Symbol
CBD_0.75	29	ENSMUSG00000033022	Cdo1	protein_coding	cysteine dioxygenase 1, cytosolic [Source:MGI Symbol
		ENSMUSG00000027165	Iftap	protein_coding	intraflagellar transport associated protein [Source:MGI Symbol
		ENSMUSG00000036712	Cyld	protein_coding	CYLD lysine 63 deubiquitinase [Source:MGI Symbol
		ENSMUSG00000031812	Map1lc3b	protein_coding	microtubule-associated protein 1 light chain 3 beta [Source:MGI Symbol
		ENSMUSG00000027367	Stard7	protein_coding	START domain containing 7 [Source:MGI Symbol
		ENSMUSG00000063415	Cyp26b1	protein_coding	cytochrome P450, family 26, subfamily b, polypeptide 1 [Source:MGI Symbol
		ENSMUSG00000024991	Eif3a	protein_coding	eukaryotic translation initiation factor 3, subunit A [Source:MGI Symbol
		ENSMUSG00000027132	Katnbl1	protein_coding	katanin p80 subunit B like 1 [Source:MGI Symbol
		ENSMUSG00000049932	H2ax	protein_coding	H2A.X variant histone [Source:MGI Symbol
		ENSMUSG00000022037	Clu	protein_coding	clusterin [Source:MGI Symbol
		ENSMUSG00000030790	Adm	protein_coding	adrenomedullin [Source:MGI Symbol
		ENSMUSG00000026020	Nop58	protein_coding	NOP58 ribonucleoprotein [Source:MGI Symbol
		ENSMUSG00000022283	Pabpc1	protein_coding	poly(A) binding protein, cytoplasmic 1 [Source:MGI Symbol
		ENSMUSG00000052609	Plekhg3	protein_coding	pleckstrin homology domain containing, family G (with RhoGef domain) member 3 [Source:MGI Symbol
		ENSMUSG00000064351	mt-Co1	protein_coding	mitochondrially encoded cytochrome c oxidase I [Source:MGI Symbol
		ENSMUSG00000030468	Siglecg	protein_coding	sialic acid binding Ig-like lectin G [Source:MGI Symbol
		ENSMUSG00000021771	Vdac2	protein_coding	voltage-dependent anion channel 2 [Source:MGI Symbol
		ENSMUSG00000020361	Hspa4	protein_coding	heat shock protein 4 [Source:MGI Symbol
		ENSMUSG00000024908	Ppp6r3	protein_coding	protein phosphatase 6, regulatory subunit 3 [Source:MGI Symbol
		ENSMUSG00000029649	Pomp	protein_coding	proteasome maturation protein [Source:MGI Symbol
		ENSMUSG00000025362	Rps26	protein_coding	ribosomal protein S26 [Source:MGI Symbol
		ENSMUSG00000024164	C3	protein_coding	complement component 3 [Source:MGI Symbol
		ENSMUSG00000020029	Nudt4	protein_coding	nudix (nucleoside diphosphate linked moiety X)-type motif 4 [Source:MGI Symbol
		ENSMUSG00000005958	Ephb3	protein_coding	Eph receptor B3 [Source:MGI Symbol
		ENSMUSG00000024120	Lrpprc	protein_coding	leucine-rich PPR-motif containing [Source:MGI Symbol
		ENSMUSG00000055670	Zzef1	protein_coding	zinc finger, ZZ-type with EF hand domain 1 [Source:MGI Symbol
		ENSMUSG00000020267	Hint1	protein_coding	histidine triad nucleotide binding protein 1 [Source:MGI Symbol
		ENSMUSG00000002477	Snrpd1	protein_coding	small nuclear ribonucleoprotein D1 [Source:MGI Symbol
		ENSMUSG00000058239	Usf2	protein_coding	upstream transcription factor 2 [Source:MGI Symbol
CBD_1.5	12	ENSMUSG00000070858	Gm1673	protein_coding	predicted gene 1673 [Source:MGI Symbol
		ENSMUSG00000057278	Snrpg	protein_coding	small nuclear ribonucleoprotein polypeptide G [Source:MGI Symbol
		ENSMUSG00000118642	AY036118	pseudogene	cDNA sequence AY036118 [Source:MGI Symbol
		ENSMUSG00000015994	Fnta	protein_coding	farnesyltransferase, CAAX box, alpha [Source:MGI Symbol
		ENSMUSG00000025823	Pdia4	protein_coding	protein disulfide isomerase associated 4 [Source:MGI Symbol
		ENSMUSG00000063052	Lrrc40	protein_coding	leucine rich repeat containing 40 [Source:MGI Symbol
		ENSMUSG00000001783	Rtcb	protein_coding	RNA 2',3'-cyclic phosphate and 5'-OH ligase [Source:MGI Symbol
		ENSMUSG00000032536	Trak1	protein_coding	trafficking protein, kinesin binding 1 [Source:MGI Symbol
		ENSMUSG00000052713	Zfp608	protein_coding	zinc finger protein 608 [Source:MGI Symbol
		ENSMUSG00000029406	Pitpnm2	protein_coding	phosphatidylinositol transfer protein, membrane-associated 2 [Source:MGI Symbol
		ENSMUSG00000027523	Gnas	protein_coding	GNAS (guanine nucleotide binding protein, alpha stimulating) complex locus [Source:MGI Symbol
		ENSMUSG00000059751	Rps3a3	processed_pseudogene	ribosomal protein S3A3 [Source:MGI Symbol
CBD_3	7	ENSMUSG00000023010	Tmbim6	protein_coding	transmembrane BAX inhibitor motif containing 6 [Source:MGI Symbol
		ENSMUSG00000004951	Hspb1	protein_coding	heat shock protein 1 [Source:MGI Symbol
		ENSMUSG00000075602	Ly6a	protein_coding	lymphocyte antigen 6 complex, locus A [Source:MGI Symbol
		ENSMUSG00000108291	Gm44292	TEC	predicted gene, 44292 [Source:MGI Symbol
		ENSMUSG00000023885	Thbs2	protein_coding	thrombospondin 2 [Source:MGI Symbol
		ENSMUSG00000072980	Oip5	protein_coding	Opa interacting protein 5 [Source:MGI Symbol
		ENSMUSG00000119584	Rn18s-rs5	rRNA	18s RNA, related sequence 5 [Source:MGI Symbol

## Sheet: 6h vs. 24h
Treatment	No of genes	Gene ID	Symbol	Type	Description
24h 6h	6	ENSMUSG00000023885	Thbs2	protein_coding	thrombospondin 2 [Source:MGI Symbol
		ENSMUSG00000040026	Saa3	protein_coding	serum amyloid A 3 [Source:MGI Symbol
		ENSMUSG00000024190	Dusp1	protein_coding	dual specificity phosphatase 1 [Source:MGI Symbol
		ENSMUSG00000050578	Mmp13	protein_coding	matrix metallopeptidase 13 [Source:MGI Symbol
		ENSMUSG00000054836	Elp6	protein_coding	elongator acetyltransferase complex subunit 6 [Source:MGI Symbol
		ENSMUSG00000026981	Il1rn	protein_coding	interleukin 1 receptor antagonist [Source:MGI Symbol
6h	135	ENSMUSG00000042284
		ENSMUSG00000030432
		ENSMUSG00000074578
		ENSMUSG00000116673
		ENSMUSG00000035692
		ENSMUSG00000026478
		ENSMUSG00000074415
		ENSMUSG00000003617
		ENSMUSG00000022528
		ENSMUSG00000042406
		ENSMUSG00000032253
		ENSMUSG00000008348
		ENSMUSG00000042473
		ENSMUSG00000035413
		ENSMUSG00000024843
		ENSMUSG00000033307
		ENSMUSG00000064080
		ENSMUSG00000043613
		ENSMUSG00000117521
		ENSMUSG00000025648
		ENSMUSG00000052684
		ENSMUSG00000117407
		ENSMUSG00000036880
		ENSMUSG00000024925
		ENSMUSG00000067847
		ENSMUSG00000028494
		ENSMUSG00000056708
		ENSMUSG00000030218
		ENSMUSG00000058833
		ENSMUSG00000001131
		ENSMUSG00000032518
		ENSMUSG00000040824
		ENSMUSG00000007480
		ENSMUSG00000038418
		ENSMUSG00000041891
		ENSMUSG00000009630
		ENSMUSG00000090386
		ENSMUSG00000071547
		ENSMUSG00000024953
		ENSMUSG00000035783
		ENSMUSG00000029377
		ENSMUSG00000027966
		ENSMUSG00000101609
		ENSMUSG00000108414
		ENSMUSG00000045328
		ENSMUSG00000028364
		ENSMUSG00000003363
		ENSMUSG00000039316
		ENSMUSG00000034459
		ENSMUSG00000056749
		ENSMUSG00000005125
		ENSMUSG00000092746
		ENSMUSG00000047557
		ENSMUSG00000033159
		ENSMUSG00000002083
		ENSMUSG00000025289
		ENSMUSG00000021453
		ENSMUSG00000083716
		ENSMUSG00000003541
		ENSMUSG00000041313
		ENSMUSG00000040435
		ENSMUSG00000021186
		ENSMUSG00000004891
		ENSMUSG00000052837
		ENSMUSG00000021701
		ENSMUSG00000029561
		ENSMUSG00000051341
		ENSMUSG00000025792
		ENSMUSG00000041827
		ENSMUSG00000024290
		ENSMUSG00000020184
		ENSMUSG00000023034
		ENSMUSG00000076431
		ENSMUSG00000031229
		ENSMUSG00000096210
		ENSMUSG00000032363
		ENSMUSG00000027803
		ENSMUSG00000032271
		ENSMUSG00000025232
		ENSMUSG00000023921
		ENSMUSG00000092805
		ENSMUSG00000015837
		ENSMUSG00000019738
		ENSMUSG00000007682
		ENSMUSG00000058135
		ENSMUSG00000014846
		ENSMUSG00000108649
		ENSMUSG00000057863
		ENSMUSG00000085156
		ENSMUSG00000034349
		ENSMUSG00000032501
		ENSMUSG00002076161
		ENSMUSG00000025651
		ENSMUSG00000038508
		ENSMUSG00000033684
		ENSMUSG00000017493
		ENSMUSG00000022816
		ENSMUSG00000111415
		ENSMUSG00000074247
		ENSMUSG00000022856
		ENSMUSG00000001627
		ENSMUSG00000031827
		ENSMUSG00000031757
		ENSMUSG00000055435
		ENSMUSG00000023004
		ENSMUSG00000000078
		ENSMUSG00000029163
		ENSMUSG00000075324
		ENSMUSG00000037379
		ENSMUSG00000022817
		ENSMUSG00000059187
		ENSMUSG00000022048
		ENSMUSG00000120645
		ENSMUSG00000073489
		ENSMUSG00000050552
		ENSMUSG00000026360
		ENSMUSG00000090272
		ENSMUSG00000032194
		ENSMUSG00000039883
		ENSMUSG00000030717
		ENSMUSG00000032402
		ENSMUSG00000027111
		ENSMUSG00000005413
		ENSMUSG00000033788
		ENSMUSG00000022557
		ENSMUSG00000003545
		ENSMUSG00000026740
		ENSMUSG00000042133
		ENSMUSG00000023067
		ENSMUSG00000048772
		ENSMUSG00000021250
		ENSMUSG00000001750
		ENSMUSG00000029394
		ENSMUSG00000062997
		ENSMUSG00000028972
24h	83	ENSMUSG00000064367
		ENSMUSG00000033022
		ENSMUSG00000038848
		ENSMUSG00000112099
		ENSMUSG00000032714
		ENSMUSG00000063415
		ENSMUSG00000024991
		ENSMUSG00000027132
		ENSMUSG00000061315
		ENSMUSG00000061353
		ENSMUSG00000049932
		ENSMUSG00000057278
		ENSMUSG00000118642
		ENSMUSG00000070934
		ENSMUSG00000022283
		ENSMUSG00000026020
		ENSMUSG00000030246
		ENSMUSG00000086503
		ENSMUSG00000015994
		ENSMUSG00000064351
		ENSMUSG00000025823
		ENSMUSG00000030468
		ENSMUSG00000026822
		ENSMUSG00000036820
		ENSMUSG00000029649
		ENSMUSG00000075602
		ENSMUSG00000001783
		ENSMUSG00000108291
		ENSMUSG00000020440
		ENSMUSG00000039680
		ENSMUSG00000024120
		ENSMUSG00000064337
		ENSMUSG00000038530
		ENSMUSG00000057534
		ENSMUSG00000030551
		ENSMUSG00000001829
		ENSMUSG00000058239
		ENSMUSG00000058905
		ENSMUSG00000059751
		ENSMUSG00000023010
		ENSMUSG00000070858
		ENSMUSG00000004951
		ENSMUSG00000027165
		ENSMUSG00000078193
		ENSMUSG00000036712
		ENSMUSG00000031812
		ENSMUSG00000027367
		ENSMUSG00000060591
		ENSMUSG00000064339
		ENSMUSG00000022037
		ENSMUSG00000026620
		ENSMUSG00000030790
		ENSMUSG00000021567
		ENSMUSG00000040459
		ENSMUSG00000052609
		ENSMUSG00000029455
		ENSMUSG00000036904
		ENSMUSG00000048546
		ENSMUSG00000032531
		ENSMUSG00000021771
		ENSMUSG00000063052
		ENSMUSG00000024908
		ENSMUSG00000020361
		ENSMUSG00000025362
		ENSMUSG00000024164
		ENSMUSG00000032536
		ENSMUSG00000064363
		ENSMUSG00000020029
		ENSMUSG00000040097
		ENSMUSG00000027447
		ENSMUSG00000052713
		ENSMUSG00000005958
		ENSMUSG00000029406
		ENSMUSG00000022330
		ENSMUSG00000055670
		ENSMUSG00000026749
		ENSMUSG00000022836
		ENSMUSG00000020267
		ENSMUSG00000002477
		ENSMUSG00000072980
		ENSMUSG00000027523
		ENSMUSG00000119584
		ENSMUSG00000022206
