# Supplementary material for: Elucidating the transcriptomic response of adult-derived mHypoA-2/12 mouse hypothalamic neuron cell line to cannabidiol (CBD) exposure
Source: J Appl Genet. 2025 May 8;66(4):1029–51. doi: 10.1007/s13353-025-00970-8 (PMC12605594; doi:10.1007/s13353-025-00970-8)
Supplement: Supplementary file 5 — Supplementary file5 Altered genes (by all CBD concentrations separately at 6 h treatment) overrepresentation tests in GO biological processes and KEEG pathways categories (including comparative reanalysis of processes/pathways) (XLSX 444 KB) [file 13353_2025_970_MOESM5_ESM.xlsx]

## Sheet: 0.325uM_BP
	group	FDR	nGenes	Pathway size	Fold enriched	Pathway	URL	Genes
1	Upregulated	0.00413	13	2595	3.73856	Immune system process	http://amigo.geneontology.org/amigo/term/GO:0002376	ENSMUSG00000090272, ENSMUSG00000005125, ENSMUSG00000005413, ENSMUSG00000015837, ENSMUSG00000022528, ENSMUSG00000024190, ENSMUSG00000029561, ENSMUSG00000032402, ENSMUSG00000034459, ENSMUSG00000035692, ENSMUSG00000041827, ENSMUSG00000023067, ENSMUSG00000052837
2	Upregulated	0.00413	16	3834	2.84507	Response to stress	http://amigo.geneontology.org/amigo/term/GO:0006950	ENSMUSG00000002083, ENSMUSG00000005413, ENSMUSG00000024190, ENSMUSG00000029561, ENSMUSG00000034459, ENSMUSG00000040435, ENSMUSG00000041827, ENSMUSG00000090272, ENSMUSG00000023067, ENSMUSG00000005125, ENSMUSG00000015837, ENSMUSG00000020184, ENSMUSG00000021453, ENSMUSG00000032402, ENSMUSG00000035692, ENSMUSG00000021701
3	Upregulated	0.00413	12	2102	3.98691	Cell population proliferation	http://amigo.geneontology.org/amigo/term/GO:0008283	ENSMUSG00000052837, ENSMUSG00000022528, ENSMUSG00000005125, ENSMUSG00000005413, ENSMUSG00000023034, ENSMUSG00000023067, ENSMUSG00000027803, ENSMUSG00000032402, ENSMUSG00000015837, ENSMUSG00000024190, ENSMUSG00000020184, ENSMUSG00000040435
4	Upregulated	0.00413	15	3162	3.27587	Cellular response to chemical stimulus	http://amigo.geneontology.org/amigo/term/GO:0070887	ENSMUSG00000023034, ENSMUSG00000032402, ENSMUSG00000090272, ENSMUSG00000005413, ENSMUSG00000034459, ENSMUSG00000052837, ENSMUSG00000002083, ENSMUSG00000005125, ENSMUSG00000020184, ENSMUSG00000022528, ENSMUSG00000024190, ENSMUSG00000035692, ENSMUSG00000041827, ENSMUSG00000029561, ENSMUSG00000040435
5	Upregulated	0.00414	11	1765	4.35483	Regulation of cell population proliferation	http://amigo.geneontology.org/amigo/term/GO:0042127	ENSMUSG00000052837, ENSMUSG00000022528, ENSMUSG00000005125, ENSMUSG00000005413, ENSMUSG00000023034, ENSMUSG00000023067, ENSMUSG00000027803, ENSMUSG00000032402, ENSMUSG00000024190, ENSMUSG00000020184, ENSMUSG00000040435
6	Upregulated	0.00496	2	4	272.771	Positive regulation of protein oligomerization	http://amigo.geneontology.org/amigo/term/GO:0032461	ENSMUSG00000002083, ENSMUSG00000035692
7	Upregulated	0.00496	9	1090	5.38363	Negative regulation of protein metabolic process	http://amigo.geneontology.org/amigo/term/GO:0051248	ENSMUSG00000015837, ENSMUSG00000023034, ENSMUSG00000023067, ENSMUSG00000040435, ENSMUSG00000024190, ENSMUSG00000027803, ENSMUSG00000032402, ENSMUSG00000035692, ENSMUSG00000020184
8	Upregulated	0.00593	7	595	7.44404	Positive regulation of programmed cell death	http://amigo.geneontology.org/amigo/term/GO:0043068	ENSMUSG00000023034, ENSMUSG00000002083, ENSMUSG00000021453, ENSMUSG00000005413, ENSMUSG00000023067, ENSMUSG00000024190, ENSMUSG00000040435
9	Upregulated	0.00638	9	1160	4.96951	Circulatory system development	http://amigo.geneontology.org/amigo/term/GO:0072359	ENSMUSG00000005413, ENSMUSG00000023034, ENSMUSG00000022528, ENSMUSG00000020184, ENSMUSG00000032402, ENSMUSG00000021701, ENSMUSG00000023067, ENSMUSG00000052837, ENSMUSG00000040435
10	Upregulated	0.00671	11	1972	3.68836	Apoptotic process	http://amigo.geneontology.org/amigo/term/GO:0006915	ENSMUSG00000002083, ENSMUSG00000020184, ENSMUSG00000023034, ENSMUSG00000005413, ENSMUSG00000015837, ENSMUSG00000021453, ENSMUSG00000032402, ENSMUSG00000040435, ENSMUSG00000021701, ENSMUSG00000023067, ENSMUSG00000024190
11	Upregulated	0.00671	10	1600	4.20294	Regulation of apoptotic process	http://amigo.geneontology.org/amigo/term/GO:0042981	ENSMUSG00000023034, ENSMUSG00000002083, ENSMUSG00000005413, ENSMUSG00000020184, ENSMUSG00000021453, ENSMUSG00000032402, ENSMUSG00000021701, ENSMUSG00000023067, ENSMUSG00000024190, ENSMUSG00000040435
12	Upregulated	0.00671	10	1631	4.12352	Regulation of programmed cell death	http://amigo.geneontology.org/amigo/term/GO:0043067	ENSMUSG00000023034, ENSMUSG00000002083, ENSMUSG00000005413, ENSMUSG00000020184, ENSMUSG00000021453, ENSMUSG00000032402, ENSMUSG00000021701, ENSMUSG00000023067, ENSMUSG00000024190, ENSMUSG00000040435
13	Upregulated	0.00671	2	6	181.847	Interleukin-27-mediated signaling pathway	http://amigo.geneontology.org/amigo/term/GO:0070106	ENSMUSG00000041827, ENSMUSG00000029561
14	Upregulated	0.00738	7	732	6.05197	Blood vessel development	http://amigo.geneontology.org/amigo/term/GO:0001568	ENSMUSG00000005413, ENSMUSG00000023034, ENSMUSG00000022528, ENSMUSG00000020184, ENSMUSG00000021701, ENSMUSG00000052837, ENSMUSG00000040435
15	Upregulated	0.00738	5	327	9.57091	Response to hypoxia	http://amigo.geneontology.org/amigo/term/GO:0001666	ENSMUSG00000002083, ENSMUSG00000005125, ENSMUSG00000005413, ENSMUSG00000020184, ENSMUSG00000032402
16	Upregulated	0.00738	7	763	5.80363	Vasculature development	http://amigo.geneontology.org/amigo/term/GO:0001944	ENSMUSG00000005413, ENSMUSG00000023034, ENSMUSG00000022528, ENSMUSG00000020184, ENSMUSG00000021701, ENSMUSG00000052837, ENSMUSG00000040435
17	Upregulated	0.00738	3	51	33.4005	Cell migration involved in sprouting angiogenesis	http://amigo.geneontology.org/amigo/term/GO:0002042	ENSMUSG00000005413, ENSMUSG00000023034, ENSMUSG00000021701
18	Upregulated	0.00738	2	11	109.108	DNA damage response signal transduction by p53 class mediator resulting in cell cycle arrest	http://amigo.geneontology.org/amigo/term/GO:0006977	ENSMUSG00000020184, ENSMUSG00000023067
19	Upregulated	0.00738	7	735	6.39664	Negative regulation of cell population proliferation	http://amigo.geneontology.org/amigo/term/GO:0008285	ENSMUSG00000022528, ENSMUSG00000005413, ENSMUSG00000023067, ENSMUSG00000032402, ENSMUSG00000005125, ENSMUSG00000024190, ENSMUSG00000040435
20	Upregulated	0.00738	15	3929	2.50555	Positive regulation of metabolic process	http://amigo.geneontology.org/amigo/term/GO:0009893	ENSMUSG00000002083, ENSMUSG00000027803, ENSMUSG00000040435, ENSMUSG00000090272, ENSMUSG00000022528, ENSMUSG00000023034, ENSMUSG00000032402, ENSMUSG00000000078, ENSMUSG00000015837, ENSMUSG00000020184, ENSMUSG00000021701, ENSMUSG00000023067, ENSMUSG00000035692, ENSMUSG00000052837, ENSMUSG00000005413
21	Upregulated	0.00738	11	2026	3.59554	Programmed cell death	http://amigo.geneontology.org/amigo/term/GO:0012501	ENSMUSG00000002083, ENSMUSG00000020184, ENSMUSG00000023034, ENSMUSG00000005413, ENSMUSG00000015837, ENSMUSG00000021453, ENSMUSG00000032402, ENSMUSG00000040435, ENSMUSG00000021701, ENSMUSG00000023067, ENSMUSG00000024190
22	Upregulated	0.00738	12	2655	3.03079	Negative regulation of cellular metabolic process	http://amigo.geneontology.org/amigo/term/GO:0031324	ENSMUSG00000015837, ENSMUSG00000022528, ENSMUSG00000023034, ENSMUSG00000023067, ENSMUSG00000032402, ENSMUSG00000040435, ENSMUSG00000020184, ENSMUSG00000024190, ENSMUSG00000027803, ENSMUSG00000035692, ENSMUSG00000005413, ENSMUSG00000021701
23	Upregulated	0.00738	6	520	7.08496	Negative regulation of protein modification process	http://amigo.geneontology.org/amigo/term/GO:0031400	ENSMUSG00000015837, ENSMUSG00000023067, ENSMUSG00000040435, ENSMUSG00000024190, ENSMUSG00000027803, ENSMUSG00000035692
24	Upregulated	0.00738	12	2416	3.22488	Regulation of cellular protein metabolic process	http://amigo.geneontology.org/amigo/term/GO:0032268	ENSMUSG00000002083, ENSMUSG00000040435, ENSMUSG00000015837, ENSMUSG00000022528, ENSMUSG00000023034, ENSMUSG00000023067, ENSMUSG00000020184, ENSMUSG00000024190, ENSMUSG00000027803, ENSMUSG00000032402, ENSMUSG00000035692, ENSMUSG00000021701
25	Upregulated	0.00738	8	1019	5.14056	Negative regulation of cellular protein metabolic process	http://amigo.geneontology.org/amigo/term/GO:0032269	ENSMUSG00000015837, ENSMUSG00000023034, ENSMUSG00000023067, ENSMUSG00000040435, ENSMUSG00000024190, ENSMUSG00000027803, ENSMUSG00000035692, ENSMUSG00000020184
26	Upregulated	0.00738	11	1909	3.46676	Cellular response to stress	http://amigo.geneontology.org/amigo/term/GO:0033554	ENSMUSG00000002083, ENSMUSG00000024190, ENSMUSG00000040435, ENSMUSG00000023067, ENSMUSG00000005125, ENSMUSG00000005413, ENSMUSG00000015837, ENSMUSG00000020184, ENSMUSG00000021453, ENSMUSG00000021701, ENSMUSG00000032402
27	Upregulated	0.00738	12	2517	3.10408	Intracellular signal transduction	http://amigo.geneontology.org/amigo/term/GO:0035556	ENSMUSG00000002083, ENSMUSG00000024190, ENSMUSG00000027803, ENSMUSG00000023067, ENSMUSG00000005125, ENSMUSG00000005413, ENSMUSG00000015837, ENSMUSG00000020184, ENSMUSG00000021453, ENSMUSG00000041827, ENSMUSG00000032402, ENSMUSG00000021701
28	Upregulated	0.00738	4	156	15.0494	Cellular response to decreased oxygen levels	http://amigo.geneontology.org/amigo/term/GO:0036294	ENSMUSG00000002083, ENSMUSG00000005125, ENSMUSG00000005413, ENSMUSG00000020184
29	Upregulated	0.00738	8	1157	4.80653	Negative regulation of molecular function	http://amigo.geneontology.org/amigo/term/GO:0044092	ENSMUSG00000022528, ENSMUSG00000023034, ENSMUSG00000023067, ENSMUSG00000005413, ENSMUSG00000024190, ENSMUSG00000027803, ENSMUSG00000020184, ENSMUSG00000040435
30	Upregulated	0.00738	3	58	33.4005	Negative regulation of viral genome replication	http://amigo.geneontology.org/amigo/term/GO:0045071	ENSMUSG00000029561, ENSMUSG00000041827, ENSMUSG00000035692
31	Upregulated	0.00738	13	3024	2.86895	Regulation of molecular function	http://amigo.geneontology.org/amigo/term/GO:0065009	ENSMUSG00000002083, ENSMUSG00000029561, ENSMUSG00000040435, ENSMUSG00000041827, ENSMUSG00000022528, ENSMUSG00000023034, ENSMUSG00000023067, ENSMUSG00000032402, ENSMUSG00000005413, ENSMUSG00000024190, ENSMUSG00000027803, ENSMUSG00000020184, ENSMUSG00000021701
32	Upregulated	0.00738	7	851	5.6491	Cellular response to cytokine stimulus	http://amigo.geneontology.org/amigo/term/GO:0071345	ENSMUSG00000090272, ENSMUSG00000034459, ENSMUSG00000022528, ENSMUSG00000024190, ENSMUSG00000035692, ENSMUSG00000041827, ENSMUSG00000029561
33	Upregulated	0.00738	4	147	16.0453	Cellular response to hypoxia	http://amigo.geneontology.org/amigo/term/GO:0071456	ENSMUSG00000002083, ENSMUSG00000005125, ENSMUSG00000005413, ENSMUSG00000020184
34	Upregulated	0.00738	4	145	15.8128	Signal transduction by p53 class mediator	http://amigo.geneontology.org/amigo/term/GO:0072331	ENSMUSG00000023067, ENSMUSG00000005125, ENSMUSG00000020184, ENSMUSG00000002083
35	Upregulated	0.00752	11	2206	3.29361	Cell death	http://amigo.geneontology.org/amigo/term/GO:0008219	ENSMUSG00000002083, ENSMUSG00000020184, ENSMUSG00000023034, ENSMUSG00000005413, ENSMUSG00000015837, ENSMUSG00000021453, ENSMUSG00000032402, ENSMUSG00000040435, ENSMUSG00000021701, ENSMUSG00000023067, ENSMUSG00000024190
36	Upregulated	0.00752	5	339	9.21523	Response to decreased oxygen levels	http://amigo.geneontology.org/amigo/term/GO:0036293	ENSMUSG00000002083, ENSMUSG00000005125, ENSMUSG00000005413, ENSMUSG00000020184, ENSMUSG00000032402
37	Upregulated	0.00752	8	1171	4.69788	Negative regulation of cell death	http://amigo.geneontology.org/amigo/term/GO:0060548	ENSMUSG00000023034, ENSMUSG00000005413, ENSMUSG00000020184, ENSMUSG00000032402, ENSMUSG00000021701, ENSMUSG00000023067, ENSMUSG00000024190, ENSMUSG00000040435
38	Upregulated	0.00752	2	15	99.1894	Regulation of ribonuclease activity	http://amigo.geneontology.org/amigo/term/GO:0060700	ENSMUSG00000029561, ENSMUSG00000041827
39	Upregulated	0.00758	5	384	8.88504	Response to virus	http://amigo.geneontology.org/amigo/term/GO:0009615	ENSMUSG00000029561, ENSMUSG00000034459, ENSMUSG00000041827, ENSMUSG00000032402, ENSMUSG00000035692
40	Upregulated	0.00758	8	1056	4.5892	Regulation of cell cycle	http://amigo.geneontology.org/amigo/term/GO:0051726	ENSMUSG00000021701, ENSMUSG00000052837, ENSMUSG00000020184, ENSMUSG00000023034, ENSMUSG00000023067, ENSMUSG00000021453, ENSMUSG00000022528, ENSMUSG00000024190
41	Upregulated	0.00758	3	71	26.8299	Regulation of vascular associated smooth muscle cell proliferation	http://amigo.geneontology.org/amigo/term/GO:1904705	ENSMUSG00000005413, ENSMUSG00000023067, ENSMUSG00000020184
42	Upregulated	0.0077	3	67	25.5723	DNA damage response signal transduction by p53 class mediator	http://amigo.geneontology.org/amigo/term/GO:0030330	ENSMUSG00000023067, ENSMUSG00000005125, ENSMUSG00000020184
43	Upregulated	0.00811	8	1136	4.49005	Tube development	http://amigo.geneontology.org/amigo/term/GO:0035295	ENSMUSG00000005413, ENSMUSG00000023034, ENSMUSG00000032402, ENSMUSG00000022528, ENSMUSG00000027803, ENSMUSG00000021701, ENSMUSG00000052837, ENSMUSG00000040435

## Sheet: 0.325uM_KEEG
	group	FDR	nGenes	Pathway size	Fold enriched	Pathway	URL	Genes
1	Upregulated	0.00123	5	131	14.5217	FoxO signaling pathway	http://www.genome.jp/kegg-bin/show_pathway?mmu04068	ENSMUSG00000023067, ENSMUSG00000032402, ENSMUSG00000020184, ENSMUSG00000021701, ENSMUSG00000021453
2	Upregulated	0.00123	4	72	19.9403	P53 signaling pathway	http://www.genome.jp/kegg-bin/show_pathway?mmu04115	ENSMUSG00000023067, ENSMUSG00000002083, ENSMUSG00000020184, ENSMUSG00000021453
3	Upregulated	0.00123	5	175	11.2081	Cellular senescence	http://www.genome.jp/kegg-bin/show_pathway?mmu04218	ENSMUSG00000023067, ENSMUSG00000032402, ENSMUSG00000020184, ENSMUSG00000015837, ENSMUSG00000021453
4	Upregulated	0.00123	4	76	18.0541	Chronic myeloid leukemia	http://www.genome.jp/kegg-bin/show_pathway?mmu05220	ENSMUSG00000023067, ENSMUSG00000032402, ENSMUSG00000020184, ENSMUSG00000021453
5	Upregulated	0.00152	4	88	16.0964	Colorectal cancer	http://www.genome.jp/kegg-bin/show_pathway?mmu05210	ENSMUSG00000023067, ENSMUSG00000002083, ENSMUSG00000032402, ENSMUSG00000021453
6	Upregulated	0.00289	7	542	5.14978	Pathways in cancer	http://www.genome.jp/kegg-bin/show_pathway?mmu05200	ENSMUSG00000023067, ENSMUSG00000022528, ENSMUSG00000005413, ENSMUSG00000002083, ENSMUSG00000032402, ENSMUSG00000020184, ENSMUSG00000021453
7	Upregulated	0.00452	4	125	11.1333	Cell cycle	http://www.genome.jp/kegg-bin/show_pathway?mmu04110	ENSMUSG00000023067, ENSMUSG00000032402, ENSMUSG00000020184, ENSMUSG00000021453
8	Upregulated	0.00701	3	72	16.9831	Melanoma	http://www.genome.jp/kegg-bin/show_pathway?mmu05218	ENSMUSG00000023067, ENSMUSG00000020184, ENSMUSG00000021453
9	Upregulated	0.00814	3	80	14.9552	Platinum drug resistance	http://www.genome.jp/kegg-bin/show_pathway?mmu01524	ENSMUSG00000023067, ENSMUSG00000002083, ENSMUSG00000020184
10	Upregulated	0.00814	4	173	8.73203	Hepatocellular carcinoma	http://www.genome.jp/kegg-bin/show_pathway?mmu05225	ENSMUSG00000023067, ENSMUSG00000005413, ENSMUSG00000032402, ENSMUSG00000021453
11	Upregulated	0.00841	3	74	14.3143	Glioma	http://www.genome.jp/kegg-bin/show_pathway?mmu05214	ENSMUSG00000023067, ENSMUSG00000020184, ENSMUSG00000021453
12	Upregulated	0.00878	5	352	5.64189	Human papillomavirus infection	http://www.genome.jp/kegg-bin/show_pathway?mmu05165	ENSMUSG00000023067, ENSMUSG00000022528, ENSMUSG00000020184, ENSMUSG00000041827, ENSMUSG00000029561
13	Upregulated	0.00878	4	222	7.76744	Epstein-Barr virus infection	http://www.genome.jp/kegg-bin/show_pathway?mmu05169	ENSMUSG00000023067, ENSMUSG00000022528, ENSMUSG00000020184, ENSMUSG00000021453
14	Upregulated	0.00878	3	76	13.5405	Pancreatic cancer	http://www.genome.jp/kegg-bin/show_pathway?mmu05212	ENSMUSG00000023067, ENSMUSG00000032402, ENSMUSG00000021453
15	Upregulated	0.024	2	37	20.2424	Thyroid cancer	http://www.genome.jp/kegg-bin/show_pathway?mmu05216	ENSMUSG00000023067, ENSMUSG00000021453
16	Upregulated	0.0255	2	41	17.5789	Bladder cancer	http://www.genome.jp/kegg-bin/show_pathway?mmu05219	ENSMUSG00000023067, ENSMUSG00000020184
17	Upregulated	0.0255	3	147	8.14634	Breast cancer	http://www.genome.jp/kegg-bin/show_pathway?mmu05224	ENSMUSG00000023067, ENSMUSG00000022528, ENSMUSG00000021453
18	Upregulated	0.0255	3	149	8.016	Gastric cancer	http://www.genome.jp/kegg-bin/show_pathway?mmu05226	ENSMUSG00000023067, ENSMUSG00000032402, ENSMUSG00000021453
19	Upregulated	0.0255	3	145	8.016	Fluid shear stress and atherosclerosis	http://www.genome.jp/kegg-bin/show_pathway?mmu05418	ENSMUSG00000005413, ENSMUSG00000015837, ENSMUSG00000024190
20	Upregulated	0.0408	3	212	6.54902	Transcriptional misregulation in cancer	http://www.genome.jp/kegg-bin/show_pathway?mmu05202	ENSMUSG00000023067, ENSMUSG00000020184, ENSMUSG00000021453
21	Upregulated	0.0408	3	162	6.46452	MicroRNAs in cancer	http://www.genome.jp/kegg-bin/show_pathway?mmu05206	ENSMUSG00000023067, ENSMUSG00000005413, ENSMUSG00000020184
22	Upregulated	0.0408	2	58	12.3704	Endometrial cancer	http://www.genome.jp/kegg-bin/show_pathway?mmu05213	ENSMUSG00000023067, ENSMUSG00000021453
23	Upregulated	0.0408	2	63	12.3704	Basal cell carcinoma	http://www.genome.jp/kegg-bin/show_pathway?mmu05217	ENSMUSG00000023067, ENSMUSG00000021453
24	Upregulated	0.0558	2	68	10.2769	Mitophagy-animal	http://www.genome.jp/kegg-bin/show_pathway?mmu04137	ENSMUSG00000015837, ENSMUSG00000008348
25	Upregulated	0.0567	2	72	9.97015	Non-small cell lung cancer	http://www.genome.jp/kegg-bin/show_pathway?mmu05223	ENSMUSG00000023067, ENSMUSG00000021453
26	Upregulated	0.0872	2	93	7.76744	Small cell lung cancer	http://www.genome.jp/kegg-bin/show_pathway?mmu05222	ENSMUSG00000023067, ENSMUSG00000021453
27	Upregulated	0.0881	2	93	7.42222	Endocrine resistance	http://www.genome.jp/kegg-bin/show_pathway?mmu01522	ENSMUSG00000023067, ENSMUSG00000020184
28	Upregulated	0.0881	2	99	7.50562	Prostate cancer	http://www.genome.jp/kegg-bin/show_pathway?mmu05215	ENSMUSG00000023067, ENSMUSG00000020184
29	Upregulated	0.0914	2	113	6.8866	HIF-1 signaling pathway	http://www.genome.jp/kegg-bin/show_pathway?mmu04066	ENSMUSG00000023067, ENSMUSG00000005413
30	Upregulated	0.0914	2	124	6.8866	Osteoclast differentiation	http://www.genome.jp/kegg-bin/show_pathway?mmu04380	ENSMUSG00000052837, ENSMUSG00000015837
31	Upregulated	0.0914	1	27	30.3636	Maturity onset diabetes of the young	http://www.genome.jp/kegg-bin/show_pathway?mmu04950	ENSMUSG00000022528
32	Upregulated	0.0986	1	17	25.6923	Nitrogen metabolism	http://www.genome.jp/kegg-bin/show_pathway?mmu00910	ENSMUSG00000028972
33	Upregulated	0.0986	3	294	3.97619	MAPK signaling pathway	http://www.genome.jp/kegg-bin/show_pathway?mmu04010	ENSMUSG00000023034, ENSMUSG00000024190, ENSMUSG00000021453

## Sheet: 0.75uM_BP
	group	FDR	nGenes	Pathway size	Fold enriched	Pathway	URL	Genes
1	Upregulated	0.0164	2	5	349.147	Negative regulation of transcription from RNA polymerase II promoter in response to endoplasmic reticulum stress	http://amigo.geneontology.org/amigo/term/GO:1990441	ENSMUSG00000040435, ENSMUSG00000052684
2	Upregulated	0.036	10	3162	3.49426	Cellular response to chemical stimulus	http://amigo.geneontology.org/amigo/term/GO:0070887	ENSMUSG00000023034, ENSMUSG00000090272, ENSMUSG00000003545, ENSMUSG00000052684, ENSMUSG00000002083, ENSMUSG00000005125, ENSMUSG00000009630, ENSMUSG00000022528, ENSMUSG00000041827, ENSMUSG00000040435
3	Upregulated	0.0404	4	254	14.7944	Response to endoplasmic reticulum stress	http://amigo.geneontology.org/amigo/term/GO:0034976	ENSMUSG00000002083, ENSMUSG00000040435, ENSMUSG00000052684, ENSMUSG00000009630
4	Upregulated	0.0442	3	114	24.4729	Apoptotic mitochondrial changes	http://amigo.geneontology.org/amigo/term/GO:0008637	ENSMUSG00000002083, ENSMUSG00000052684, ENSMUSG00000009630
5	Upregulated	0.0442	5	595	8.50747	Positive regulation of programmed cell death	http://amigo.geneontology.org/amigo/term/GO:0043068	ENSMUSG00000023034, ENSMUSG00000002083, ENSMUSG00000052684, ENSMUSG00000023067, ENSMUSG00000040435
6	Upregulated	0.0442	2	20	87.2867	Peptidyl-serine dephosphorylation	http://amigo.geneontology.org/amigo/term/GO:0070262	ENSMUSG00000009630, ENSMUSG00000040435
7	Upregulated	0.0491	6	1157	5.76784	Negative regulation of molecular function	http://amigo.geneontology.org/amigo/term/GO:0044092	ENSMUSG00000022528, ENSMUSG00000023034, ENSMUSG00000023067, ENSMUSG00000009630, ENSMUSG00000052684, ENSMUSG00000040435
8	Upregulated	0.0527	5	735	7.31044	Negative regulation of cell population proliferation	http://amigo.geneontology.org/amigo/term/GO:0008285	ENSMUSG00000022528, ENSMUSG00000023067, ENSMUSG00000052684, ENSMUSG00000005125, ENSMUSG00000040435
9	Upregulated	0.0527	6	1199	5.28476	Response to abiotic stimulus	http://amigo.geneontology.org/amigo/term/GO:0009628	ENSMUSG00000023067, ENSMUSG00000052684, ENSMUSG00000002083, ENSMUSG00000003545, ENSMUSG00000005125, ENSMUSG00000023034
10	Upregulated	0.0527	3	156	18.0593	Cellular response to decreased oxygen levels	http://amigo.geneontology.org/amigo/term/GO:0036294	ENSMUSG00000002083, ENSMUSG00000005125, ENSMUSG00000052684
11	Upregulated	0.0527	3	147	19.2544	Cellular response to hypoxia	http://amigo.geneontology.org/amigo/term/GO:0071456	ENSMUSG00000002083, ENSMUSG00000005125, ENSMUSG00000052684
12	Upregulated	0.0527	3	145	18.9754	Signal transduction by p53 class mediator	http://amigo.geneontology.org/amigo/term/GO:0072331	ENSMUSG00000023067, ENSMUSG00000005125, ENSMUSG00000002083
13	Upregulated	0.0529	4	403	9.7527	Regulation of binding	http://amigo.geneontology.org/amigo/term/GO:0051098	ENSMUSG00000022528, ENSMUSG00000009630, ENSMUSG00000023067, ENSMUSG00000052684
14	Upregulated	0.0556	4	436	9.23668	Regulation of cell growth	http://amigo.geneontology.org/amigo/term/GO:0001558	ENSMUSG00000022048, ENSMUSG00000023067, ENSMUSG00000090272, ENSMUSG00000002083
15	Upregulated	0.0556	2	65	28.157	Release of cytochrome c from mitochondria	http://amigo.geneontology.org/amigo/term/GO:0001836	ENSMUSG00000002083, ENSMUSG00000052684
16	Upregulated	0.0556	5	1139	4.66275	Regulation of protein phosphorylation	http://amigo.geneontology.org/amigo/term/GO:0001932	ENSMUSG00000022528, ENSMUSG00000023067, ENSMUSG00000040435, ENSMUSG00000015837, ENSMUSG00000052684
17	Upregulated	0.0556	7	2595	3.22091	Immune system process	http://amigo.geneontology.org/amigo/term/GO:0002376	ENSMUSG00000090272, ENSMUSG00000005125, ENSMUSG00000015837, ENSMUSG00000022528, ENSMUSG00000041827, ENSMUSG00000052684, ENSMUSG00000023067
18	Upregulated	0.0556	2	75	27.2771	Outflow tract morphogenesis	http://amigo.geneontology.org/amigo/term/GO:0003151	ENSMUSG00000022528, ENSMUSG00000052684
19	Upregulated	0.0556	7	1972	3.75542	Apoptotic process	http://amigo.geneontology.org/amigo/term/GO:0006915	ENSMUSG00000002083, ENSMUSG00000023034, ENSMUSG00000015837, ENSMUSG00000040435, ENSMUSG00000052684, ENSMUSG00000009630, ENSMUSG00000023067
20	Upregulated	0.0556	9	3834	2.56056	Response to stress	http://amigo.geneontology.org/amigo/term/GO:0006950	ENSMUSG00000002083, ENSMUSG00000040435, ENSMUSG00000041827, ENSMUSG00000090272, ENSMUSG00000023067, ENSMUSG00000005125, ENSMUSG00000015837, ENSMUSG00000052684, ENSMUSG00000009630
21	Upregulated	0.0556	4	536	6.969	Mitochondrion organization	http://amigo.geneontology.org/amigo/term/GO:0007005	ENSMUSG00000002083, ENSMUSG00000015837, ENSMUSG00000052684, ENSMUSG00000009630
22	Upregulated	0.0556	7	2206	3.35349	Cell death	http://amigo.geneontology.org/amigo/term/GO:0008219	ENSMUSG00000002083, ENSMUSG00000023034, ENSMUSG00000015837, ENSMUSG00000040435, ENSMUSG00000052684, ENSMUSG00000009630, ENSMUSG00000023067
23	Upregulated	0.0556	7	2102	3.72111	Cell population proliferation	http://amigo.geneontology.org/amigo/term/GO:0008283	ENSMUSG00000052684, ENSMUSG00000022528, ENSMUSG00000005125, ENSMUSG00000023034, ENSMUSG00000023067, ENSMUSG00000015837, ENSMUSG00000040435
24	Upregulated	0.0556	4	600	7.08208	Response to inorganic substance	http://amigo.geneontology.org/amigo/term/GO:0010035	ENSMUSG00000003545, ENSMUSG00000052684, ENSMUSG00000009630, ENSMUSG00000023034
25	Upregulated	0.0556	9	3610	2.6125	Positive regulation of macromolecule metabolic process	http://amigo.geneontology.org/amigo/term/GO:0010604	ENSMUSG00000002083, ENSMUSG00000040435, ENSMUSG00000090272, ENSMUSG00000003545, ENSMUSG00000022528, ENSMUSG00000023034, ENSMUSG00000052684, ENSMUSG00000015837, ENSMUSG00000023067
26	Upregulated	0.0556	7	2026	3.66091	Programmed cell death	http://amigo.geneontology.org/amigo/term/GO:0012501	ENSMUSG00000002083, ENSMUSG00000023034, ENSMUSG00000015837, ENSMUSG00000040435, ENSMUSG00000052684, ENSMUSG00000009630, ENSMUSG00000023067
27	Upregulated	0.0556	1	2	436.433	Regulation of skeletal muscle contraction by neural stimulation via neuromuscular junction	http://amigo.geneontology.org/amigo/term/GO:0014852	ENSMUSG00000023034
28	Upregulated	0.0556	4	518	7.81089	Cell growth	http://amigo.geneontology.org/amigo/term/GO:0016049	ENSMUSG00000022048, ENSMUSG00000023067, ENSMUSG00000090272, ENSMUSG00000002083
29	Upregulated	0.0556	1	4	436.433	Midbrain-hindbrain boundary morphogenesis	http://amigo.geneontology.org/amigo/term/GO:0021555	ENSMUSG00000022528
30	Upregulated	0.0556	1	4	436.433	Oculomotor nerve development	http://amigo.geneontology.org/amigo/term/GO:0021557	ENSMUSG00000022528
31	Upregulated	0.0556	1	3	872.867	Trochlear nerve development	http://amigo.geneontology.org/amigo/term/GO:0021558	ENSMUSG00000022528
32	Upregulated	0.0556	1	2	436.433	Cajal-Retzius cell differentiation	http://amigo.geneontology.org/amigo/term/GO:0021870	ENSMUSG00000022528
33	Upregulated	0.0556	3	195	15.0494	Negative regulation of cell growth	http://amigo.geneontology.org/amigo/term/GO:0030308	ENSMUSG00000023067, ENSMUSG00000090272, ENSMUSG00000002083
34	Upregulated	0.0556	2	67	27.2771	DNA damage response signal transduction by p53 class mediator	http://amigo.geneontology.org/amigo/term/GO:0030330	ENSMUSG00000023067, ENSMUSG00000005125
35	Upregulated	0.0556	4	520	7.55729	Negative regulation of protein modification process	http://amigo.geneontology.org/amigo/term/GO:0031400	ENSMUSG00000015837, ENSMUSG00000023067, ENSMUSG00000040435, ENSMUSG00000052684
36	Upregulated	0.0556	5	1019	5.14056	Negative regulation of cellular protein metabolic process	http://amigo.geneontology.org/amigo/term/GO:0032269	ENSMUSG00000015837, ENSMUSG00000023034, ENSMUSG00000023067, ENSMUSG00000040435, ENSMUSG00000052684
37	Upregulated	0.0556	1	3	290.956	Regulation of protein homooligomerization	http://amigo.geneontology.org/amigo/term/GO:0032462	ENSMUSG00000002083
38	Upregulated	0.0556	7	1909	3.52979	Cellular response to stress	http://amigo.geneontology.org/amigo/term/GO:0033554	ENSMUSG00000002083, ENSMUSG00000040435, ENSMUSG00000023067, ENSMUSG00000005125, ENSMUSG00000015837, ENSMUSG00000052684, ENSMUSG00000009630
39	Upregulated	0.0556	5	961	5.72747	Response to cytokine	http://amigo.geneontology.org/amigo/term/GO:0034097	ENSMUSG00000090272, ENSMUSG00000009630, ENSMUSG00000022528, ENSMUSG00000041827, ENSMUSG00000052684
40	Upregulated	0.0556	1	2	436.433	Leading edge cell differentiation	http://amigo.geneontology.org/amigo/term/GO:0035026	ENSMUSG00000052684
41	Upregulated	0.0556	6	1765	3.80058	Regulation of cell population proliferation	http://amigo.geneontology.org/amigo/term/GO:0042127	ENSMUSG00000052684, ENSMUSG00000022528, ENSMUSG00000005125, ENSMUSG00000023034, ENSMUSG00000023067, ENSMUSG00000040435
42	Upregulated	0.0556	2	43	41.5651	Intrinsic apoptotic signaling pathway in response to DNA damage by p53 class mediator	http://amigo.geneontology.org/amigo/term/GO:0042771	ENSMUSG00000002083, ENSMUSG00000023067
43	Upregulated	0.0556	4	585	6.88652	Positive regulation of apoptotic process	http://amigo.geneontology.org/amigo/term/GO:0043065	ENSMUSG00000023034, ENSMUSG00000002083, ENSMUSG00000052684, ENSMUSG00000040435
44	Upregulated	0.0556	1	5	290.956	Response to corticotropin-releasing hormone	http://amigo.geneontology.org/amigo/term/GO:0043435	ENSMUSG00000023034
45	Upregulated	0.0556	2	82	24.5878	Positive regulation of neuron apoptotic process	http://amigo.geneontology.org/amigo/term/GO:0043525	ENSMUSG00000052684, ENSMUSG00000002083
46	Upregulated	0.0556	2	52	36.3694	Regulation of DNA-templated transcription in response to stress	http://amigo.geneontology.org/amigo/term/GO:0043620	ENSMUSG00000040435, ENSMUSG00000052684

## Sheet: 0.75uM_KEEG
	group	FDR	nGenes	Pathway size	Fold enriched	Pathway	URL	Genes
1	Upregulated	0.0564	3	124	14.3029	Osteoclast differentiation	http://www.genome.jp/kegg-bin/show_pathway?mmu04380	ENSMUSG00000003545, ENSMUSG00000052684, ENSMUSG00000015837
2	Upregulated	0.0564	3	88	16.7155	Colorectal cancer	http://www.genome.jp/kegg-bin/show_pathway?mmu05210	ENSMUSG00000023067, ENSMUSG00000052684, ENSMUSG00000002083
3	Upregulated	0.063	2	48	26.4264	Cocaine addiction	http://www.genome.jp/kegg-bin/show_pathway?mmu05030	ENSMUSG00000003545, ENSMUSG00000052684
4	Upregulated	0.063	4	352	6.24948	Human papillomavirus infection	http://www.genome.jp/kegg-bin/show_pathway?mmu05165	ENSMUSG00000023067, ENSMUSG00000022528, ENSMUSG00000009630, ENSMUSG00000041827
5	Upregulated	0.063	3	147	11.2795	Breast cancer	http://www.genome.jp/kegg-bin/show_pathway?mmu05224	ENSMUSG00000023067, ENSMUSG00000022528, ENSMUSG00000052684
6	Upregulated	0.087	2	68	17.4514	Amphetamine addiction	http://www.genome.jp/kegg-bin/show_pathway?mmu05031	ENSMUSG00000003545, ENSMUSG00000052684
7	Upregulated	0.087	3	222	8.06619	Epstein-Barr virus infection	http://www.genome.jp/kegg-bin/show_pathway?mmu05169	ENSMUSG00000023067, ENSMUSG00000022528, ENSMUSG00000052684
8	Upregulated	0.0874	2	80	13.8048	Platinum drug resistance	http://www.genome.jp/kegg-bin/show_pathway?mmu01524	ENSMUSG00000023067, ENSMUSG00000002083
9	Upregulated	0.0874	2	72	13.8048	P53 signaling pathway	http://www.genome.jp/kegg-bin/show_pathway?mmu04115	ENSMUSG00000023067, ENSMUSG00000002083
10	Upregulated	0.0874	2	68	14.2296	Mitophagy-animal	http://www.genome.jp/kegg-bin/show_pathway?mmu04137	ENSMUSG00000052684, ENSMUSG00000015837
11	Upregulated	0.0874	2	68	14.014	Renal cell carcinoma	http://www.genome.jp/kegg-bin/show_pathway?mmu05211	ENSMUSG00000023067, ENSMUSG00000052684
12	Upregulated	0.0963	2	84	11.4188	ErbB signaling pathway	http://www.genome.jp/kegg-bin/show_pathway?mmu04012	ENSMUSG00000023067, ENSMUSG00000052684
13	Upregulated	0.0963	2	93	12.499	IL-17 signaling pathway	http://www.genome.jp/kegg-bin/show_pathway?mmu04657	ENSMUSG00000003545, ENSMUSG00000052684
14	Upregulated	0.0963	2	103	11.2795	Chagas disease	http://www.genome.jp/kegg-bin/show_pathway?mmu05142	ENSMUSG00000052684, ENSMUSG00000009630
15	Upregulated	0.0963	4	542	4.07455	Pathways in cancer	http://www.genome.jp/kegg-bin/show_pathway?mmu05200	ENSMUSG00000023067, ENSMUSG00000022528, ENSMUSG00000052684, ENSMUSG00000002083

## Sheet: 1.5uM_BP
	group	FDR	nGenes	Pathway size	Fold enriched	Pathway	URL	Genes
1	Upregulated	0.0024	13	2595	3.73856	Immune system process	http://amigo.geneontology.org/amigo/term/GO:0002376	ENSMUSG00000027111, ENSMUSG00000090272, ENSMUSG00000005125, ENSMUSG00000021250, ENSMUSG00000039883, ENSMUSG00000005413, ENSMUSG00000015837, ENSMUSG00000022528, ENSMUSG00000041313, ENSMUSG00000023067, ENSMUSG00000029377, ENSMUSG00000038418, ENSMUSG00000052837
2	Upregulated	0.0024	6	275	13.252	Cellular response to extracellular stimulus	http://amigo.geneontology.org/amigo/term/GO:0031668	ENSMUSG00000027111, ENSMUSG00000005413, ENSMUSG00000023067, ENSMUSG00000028494, ENSMUSG00000021250, ENSMUSG00000024843
3	Upregulated	0.0024	5	156	18.8118	Cellular response to decreased oxygen levels	http://amigo.geneontology.org/amigo/term/GO:0036294	ENSMUSG00000038418, ENSMUSG00000005125, ENSMUSG00000005413, ENSMUSG00000020184, ENSMUSG00000021250
4	Upregulated	0.0024	5	190	16.432	Smooth muscle cell proliferation	http://amigo.geneontology.org/amigo/term/GO:0048659	ENSMUSG00000005413, ENSMUSG00000023067, ENSMUSG00000029377, ENSMUSG00000020184, ENSMUSG00000038418
5	Upregulated	0.0024	5	183	17.0482	Regulation of smooth muscle cell proliferation	http://amigo.geneontology.org/amigo/term/GO:0048660	ENSMUSG00000005413, ENSMUSG00000023067, ENSMUSG00000029377, ENSMUSG00000020184, ENSMUSG00000038418
6	Upregulated	0.0024	5	147	20.0567	Cellular response to hypoxia	http://amigo.geneontology.org/amigo/term/GO:0071456	ENSMUSG00000038418, ENSMUSG00000005125, ENSMUSG00000005413, ENSMUSG00000020184, ENSMUSG00000021250
7	Upregulated	0.00343	6	351	10.3584	Cellular response to external stimulus	http://amigo.geneontology.org/amigo/term/GO:0071496	ENSMUSG00000027111, ENSMUSG00000005413, ENSMUSG00000023067, ENSMUSG00000028494, ENSMUSG00000021250, ENSMUSG00000024843
8	Upregulated	0.00369	3	31	54.5542	Cellular response to gamma radiation	http://amigo.geneontology.org/amigo/term/GO:0071480	ENSMUSG00000023067, ENSMUSG00000020184, ENSMUSG00000038418
9	Upregulated	0.0053	4	110	21.1861	Positive regulation of smooth muscle cell proliferation	http://amigo.geneontology.org/amigo/term/GO:0048661	ENSMUSG00000005413, ENSMUSG00000029377, ENSMUSG00000020184, ENSMUSG00000038418
10	Upregulated	0.00662	5	258	12.1231	Muscle cell proliferation	http://amigo.geneontology.org/amigo/term/GO:0033002	ENSMUSG00000005413, ENSMUSG00000023067, ENSMUSG00000029377, ENSMUSG00000020184, ENSMUSG00000038418
11	Upregulated	0.00792	11	2102	3.65466	Cell population proliferation	http://amigo.geneontology.org/amigo/term/GO:0008283	ENSMUSG00000029377, ENSMUSG00000052837, ENSMUSG00000022528, ENSMUSG00000005125, ENSMUSG00000005413, ENSMUSG00000023067, ENSMUSG00000041313, ENSMUSG00000056708, ENSMUSG00000015837, ENSMUSG00000020184, ENSMUSG00000038418
12	Upregulated	0.00807	2	7	155.869	Lipid droplet disassembly	http://amigo.geneontology.org/amigo/term/GO:1905691	ENSMUSG00000028494, ENSMUSG00000024843
13	Upregulated	0.00881	10	1765	3.95894	Regulation of cell population proliferation	http://amigo.geneontology.org/amigo/term/GO:0042127	ENSMUSG00000029377, ENSMUSG00000052837, ENSMUSG00000022528, ENSMUSG00000005125, ENSMUSG00000005413, ENSMUSG00000023067, ENSMUSG00000041313, ENSMUSG00000056708, ENSMUSG00000020184, ENSMUSG00000038418
14	Upregulated	0.012	7	897	5.90231	Positive regulation of immune system process	http://amigo.geneontology.org/amigo/term/GO:0002684	ENSMUSG00000090272, ENSMUSG00000021250, ENSMUSG00000005413, ENSMUSG00000041313, ENSMUSG00000023067, ENSMUSG00000022528, ENSMUSG00000029377
15	Upregulated	0.0124	5	327	9.57091	Response to hypoxia	http://amigo.geneontology.org/amigo/term/GO:0001666	ENSMUSG00000038418, ENSMUSG00000005125, ENSMUSG00000005413, ENSMUSG00000020184, ENSMUSG00000021250
16	Upregulated	0.0124	2	11	109.108	DNA damage response signal transduction by p53 class mediator resulting in cell cycle arrest	http://amigo.geneontology.org/amigo/term/GO:0006977	ENSMUSG00000020184, ENSMUSG00000023067
17	Upregulated	0.0135	3	71	26.8299	Regulation of vascular associated smooth muscle cell proliferation	http://amigo.geneontology.org/amigo/term/GO:1904705	ENSMUSG00000005413, ENSMUSG00000023067, ENSMUSG00000020184
18	Upregulated	0.0142	3	67	25.5723	DNA damage response signal transduction by p53 class mediator	http://amigo.geneontology.org/amigo/term/GO:0030330	ENSMUSG00000023067, ENSMUSG00000005125, ENSMUSG00000020184
19	Upregulated	0.0162	5	368	8.49753	Response to oxygen levels	http://amigo.geneontology.org/amigo/term/GO:0070482	ENSMUSG00000038418, ENSMUSG00000005125, ENSMUSG00000005413, ENSMUSG00000020184, ENSMUSG00000021250
20	Upregulated	0.0217	3	79	21.5345	Cellular response to ionizing radiation	http://amigo.geneontology.org/amigo/term/GO:0071479	ENSMUSG00000023067, ENSMUSG00000020184, ENSMUSG00000038418
21	Upregulated	0.0231	7	1055	4.85851	Positive regulation of cell population proliferation	http://amigo.geneontology.org/amigo/term/GO:0008284	ENSMUSG00000029377, ENSMUSG00000005413, ENSMUSG00000023067, ENSMUSG00000041313, ENSMUSG00000022528, ENSMUSG00000020184, ENSMUSG00000038418
22	Upregulated	0.0234	8	1430	4.06741	Regulation of immune system process	http://amigo.geneontology.org/amigo/term/GO:0002682	ENSMUSG00000090272, ENSMUSG00000021250, ENSMUSG00000039883, ENSMUSG00000005413, ENSMUSG00000041313, ENSMUSG00000023067, ENSMUSG00000022528, ENSMUSG00000029377
23	Upregulated	0.0234	11	2511	2.9402	Regulation of transcription by RNA polymerase II	http://amigo.geneontology.org/amigo/term/GO:0006357	ENSMUSG00000020184, ENSMUSG00000021250, ENSMUSG00000022528, ENSMUSG00000038418, ENSMUSG00000052837, ENSMUSG00000005413, ENSMUSG00000000078, ENSMUSG00000027111, ENSMUSG00000056708, ENSMUSG00000015837, ENSMUSG00000001627
24	Upregulated	0.0234	14	3929	2.33851	Positive regulation of metabolic process	http://amigo.geneontology.org/amigo/term/GO:0009893	ENSMUSG00000029377, ENSMUSG00000090272, ENSMUSG00000022528, ENSMUSG00000038418, ENSMUSG00000000078, ENSMUSG00000015837, ENSMUSG00000020184, ENSMUSG00000021250, ENSMUSG00000023067, ENSMUSG00000027111, ENSMUSG00000052837, ENSMUSG00000056708, ENSMUSG00000005413, ENSMUSG00000001627
25	Upregulated	0.0234	14	4098	2.33422	Regulation of nucleobase-containing compound metabolic process	http://amigo.geneontology.org/amigo/term/GO:0019219	ENSMUSG00000020184, ENSMUSG00000021250, ENSMUSG00000022528, ENSMUSG00000038418, ENSMUSG00000052837, ENSMUSG00000096210, ENSMUSG00000005413, ENSMUSG00000029377, ENSMUSG00000000078, ENSMUSG00000023067, ENSMUSG00000027111, ENSMUSG00000056708, ENSMUSG00000015837, ENSMUSG00000001627
26	Upregulated	0.0234	3	116	19.2544	Osteoclast differentiation	http://amigo.geneontology.org/amigo/term/GO:0030316	ENSMUSG00000021250, ENSMUSG00000039883, ENSMUSG00000052837
27	Upregulated	0.0234	2	22	54.5542	Mitotic G1 DNA damage checkpoint signaling	http://amigo.geneontology.org/amigo/term/GO:0031571	ENSMUSG00000020184, ENSMUSG00000023067
28	Upregulated	0.0234	4	239	10.0561	Cellular response to nutrient levels	http://amigo.geneontology.org/amigo/term/GO:0031669	ENSMUSG00000005413, ENSMUSG00000023067, ENSMUSG00000028494, ENSMUSG00000024843
29	Upregulated	0.0234	10	1909	3.1516	Cellular response to stress	http://amigo.geneontology.org/amigo/term/GO:0033554	ENSMUSG00000023067, ENSMUSG00000038418, ENSMUSG00000005125, ENSMUSG00000005413, ENSMUSG00000015837, ENSMUSG00000020184, ENSMUSG00000021250, ENSMUSG00000028494, ENSMUSG00000056708, ENSMUSG00000024843
30	Upregulated	0.0234	2	23	54.5542	Mitotic G1/S transition checkpoint signaling	http://amigo.geneontology.org/amigo/term/GO:0044819	ENSMUSG00000020184, ENSMUSG00000023067
31	Upregulated	0.0234	8	1302	4.00765	Positive regulation of transcription by RNA polymerase II	http://amigo.geneontology.org/amigo/term/GO:0045944	ENSMUSG00000038418, ENSMUSG00000000078, ENSMUSG00000021250, ENSMUSG00000027111, ENSMUSG00000052837, ENSMUSG00000056708, ENSMUSG00000022528, ENSMUSG00000001627
32	Upregulated	0.0234	2	24	54.5542	Labyrinthine layer blood vessel development	http://amigo.geneontology.org/amigo/term/GO:0060716	ENSMUSG00000022528, ENSMUSG00000052837
33	Upregulated	0.0234	6	689	5.58575	Muscle structure development	http://amigo.geneontology.org/amigo/term/GO:0061061	ENSMUSG00000029377, ENSMUSG00000001627, ENSMUSG00000020184, ENSMUSG00000021250, ENSMUSG00000022528, ENSMUSG00000038418
34	Upregulated	0.0282	6	732	5.1874	Blood vessel development	http://amigo.geneontology.org/amigo/term/GO:0001568	ENSMUSG00000005413, ENSMUSG00000029377, ENSMUSG00000022528, ENSMUSG00000020184, ENSMUSG00000052837, ENSMUSG00000038418
35	Upregulated	0.0282	15	4947	2.11998	Regulation of gene expression	http://amigo.geneontology.org/amigo/term/GO:0010468	ENSMUSG00000020184, ENSMUSG00000021250, ENSMUSG00000022528, ENSMUSG00000038418, ENSMUSG00000052837, ENSMUSG00000090272, ENSMUSG00000005413, ENSMUSG00000000078, ENSMUSG00000027111, ENSMUSG00000029377, ENSMUSG00000056708, ENSMUSG00000096210, ENSMUSG00000015837, ENSMUSG00000023067, ENSMUSG00000001627
36	Upregulated	0.0282	2	31	47.4384	Response to immobilization stress	http://amigo.geneontology.org/amigo/term/GO:0035902	ENSMUSG00000021250, ENSMUSG00000020184
37	Upregulated	0.0282	3	140	16.3663	Positive regulation of lymphocyte proliferation	http://amigo.geneontology.org/amigo/term/GO:0050671	ENSMUSG00000041313, ENSMUSG00000023067, ENSMUSG00000022528
38	Upregulated	0.0294	3	143	15.8896	Positive regulation of mononuclear cell proliferation	http://amigo.geneontology.org/amigo/term/GO:0032946	ENSMUSG00000041313, ENSMUSG00000023067, ENSMUSG00000022528
39	Upregulated	0.0294	2	29	45.4618	Glomerulus vasculature development	http://amigo.geneontology.org/amigo/term/GO:0072012	ENSMUSG00000022528, ENSMUSG00000038418
40	Upregulated	0.0306	2	31	43.6433	Negative regulation of vascular associated smooth muscle cell proliferation	http://amigo.geneontology.org/amigo/term/GO:1904706	ENSMUSG00000005413, ENSMUSG00000023067
41	Upregulated	0.031	6	763	4.97454	Vasculature development	http://amigo.geneontology.org/amigo/term/GO:0001944	ENSMUSG00000005413, ENSMUSG00000029377, ENSMUSG00000022528, ENSMUSG00000020184, ENSMUSG00000052837, ENSMUSG00000038418
42	Upregulated	0.0312	2	31	41.9647	Renal system vasculature development	http://amigo.geneontology.org/amigo/term/GO:0061437	ENSMUSG00000022528, ENSMUSG00000038418
43	Downregulated	0.0844	2	11	109.108	Cellular response to UV-A	http://amigo.geneontology.org/amigo/term/GO:0071492	ENSMUSG00000001131, ENSMUSG00000043613
44	Downregulated	0.0844	2	10	136.385	Negative regulation of macrophage migration	http://amigo.geneontology.org/amigo/term/GO:1905522	ENSMUSG00000033307, ENSMUSG00000029163
45	Downregulated	0.0972	2	15	83.9295	Response to UV-A	http://amigo.geneontology.org/amigo/term/GO:0070141	ENSMUSG00000001131, ENSMUSG00000043613

## Sheet: 1.5uM_KEEG
	group	FDR	nGenes	Pathway size	Fold enriched	Pathway	URL	Genes
1	Upregulated	0.0055	7	542	6.17974	Pathways in cancer	http://www.genome.jp/kegg-bin/show_pathway?mmu05200	ENSMUSG00000023067, ENSMUSG00000021250, ENSMUSG00000022528, ENSMUSG00000005413, ENSMUSG00000027111, ENSMUSG00000020184, ENSMUSG00000026478
2	Upregulated	0.0152	5	357	6.8866	PI3K-Akt signaling pathway	http://www.genome.jp/kegg-bin/show_pathway?mmu04151	ENSMUSG00000023067, ENSMUSG00000029377, ENSMUSG00000027111, ENSMUSG00000020184, ENSMUSG00000026478
3	Upregulated	0.0152	5	352	6.77027	Human papillomavirus infection	http://www.genome.jp/kegg-bin/show_pathway?mmu05165	ENSMUSG00000023067, ENSMUSG00000022528, ENSMUSG00000027111, ENSMUSG00000020184, ENSMUSG00000026478
4	Upregulated	0.0152	4	162	10.3432	MicroRNAs in cancer	http://www.genome.jp/kegg-bin/show_pathway?mmu05206	ENSMUSG00000041313, ENSMUSG00000023067, ENSMUSG00000005413, ENSMUSG00000020184
5	Upregulated	0.0177	3	93	13.36	Endocrine resistance	http://www.genome.jp/kegg-bin/show_pathway?mmu01522	ENSMUSG00000023067, ENSMUSG00000021250, ENSMUSG00000020184
6	Upregulated	0.0177	3	108	13.36	Parathyroid hormone synthesis secretion and action	http://www.genome.jp/kegg-bin/show_pathway?mmu04928	ENSMUSG00000023067, ENSMUSG00000038418, ENSMUSG00000021250
7	Upregulated	0.0177	3	88	14.4867	Colorectal cancer	http://www.genome.jp/kegg-bin/show_pathway?mmu05210	ENSMUSG00000023067, ENSMUSG00000029377, ENSMUSG00000021250
8	Upregulated	0.0177	3	93	13.9814	Small cell lung cancer	http://www.genome.jp/kegg-bin/show_pathway?mmu05222	ENSMUSG00000023067, ENSMUSG00000027111, ENSMUSG00000026478
9	Upregulated	0.0195	3	124	12.3959	Osteoclast differentiation	http://www.genome.jp/kegg-bin/show_pathway?mmu04380	ENSMUSG00000021250, ENSMUSG00000052837, ENSMUSG00000015837
10	Upregulated	0.033	3	147	9.77561	Breast cancer	http://www.genome.jp/kegg-bin/show_pathway?mmu05224	ENSMUSG00000023067, ENSMUSG00000021250, ENSMUSG00000022528
11	Upregulated	0.033	3	145	9.6192	Fluid shear stress and atherosclerosis	http://www.genome.jp/kegg-bin/show_pathway?mmu05418	ENSMUSG00000021250, ENSMUSG00000005413, ENSMUSG00000015837
12	Upregulated	0.0352	2	41	21.0947	Bladder cancer	http://www.genome.jp/kegg-bin/show_pathway?mmu05219	ENSMUSG00000023067, ENSMUSG00000020184
13	Upregulated	0.0457	3	175	8.0698	Cellular senescence	http://www.genome.jp/kegg-bin/show_pathway?mmu04218	ENSMUSG00000023067, ENSMUSG00000020184, ENSMUSG00000015837
14	Upregulated	0.0574	3	216	7.24337	Kaposi sarcoma-associated herpesvirus infection	http://www.genome.jp/kegg-bin/show_pathway?mmu05167	ENSMUSG00000023067, ENSMUSG00000021250, ENSMUSG00000008348
15	Upregulated	0.059	3	222	6.9907	Epstein-Barr virus infection	http://www.genome.jp/kegg-bin/show_pathway?mmu05169	ENSMUSG00000023067, ENSMUSG00000022528, ENSMUSG00000020184
16	Upregulated	0.0624	2	72	13.5864	Melanoma	http://www.genome.jp/kegg-bin/show_pathway?mmu05218	ENSMUSG00000023067, ENSMUSG00000020184
17	Upregulated	0.0626	2	89	13.141	PPAR signaling pathway	http://www.genome.jp/kegg-bin/show_pathway?mmu03320	ENSMUSG00000028494, ENSMUSG00000008348
18	Upregulated	0.063	2	80	11.9642	Platinum drug resistance	http://www.genome.jp/kegg-bin/show_pathway?mmu01524	ENSMUSG00000023067, ENSMUSG00000020184
19	Upregulated	0.063	2	72	11.9642	P53 signaling pathway	http://www.genome.jp/kegg-bin/show_pathway?mmu04115	ENSMUSG00000023067, ENSMUSG00000020184
20	Upregulated	0.063	2	68	12.3323	Mitophagy-animal	http://www.genome.jp/kegg-bin/show_pathway?mmu04137	ENSMUSG00000015837, ENSMUSG00000008348
21	Upregulated	0.063	3	241	5.95248	Human T-cell leukemia virus 1 infection	http://www.genome.jp/kegg-bin/show_pathway?mmu05166	ENSMUSG00000023067, ENSMUSG00000038418, ENSMUSG00000021250
22	Upregulated	0.063	2	74	11.4514	Glioma	http://www.genome.jp/kegg-bin/show_pathway?mmu05214	ENSMUSG00000023067, ENSMUSG00000020184
23	Upregulated	0.0659	2	88	10.688	ECM-receptor interaction	http://www.genome.jp/kegg-bin/show_pathway?mmu04512	ENSMUSG00000027111, ENSMUSG00000026478
24	Upregulated	0.0659	2	76	10.8324	Chronic myeloid leukemia	http://www.genome.jp/kegg-bin/show_pathway?mmu05220	ENSMUSG00000023067, ENSMUSG00000020184
25	Upregulated	0.0733	2	84	9.8963	ErbB signaling pathway	http://www.genome.jp/kegg-bin/show_pathway?mmu04012	ENSMUSG00000023067, ENSMUSG00000029377
26	Upregulated	0.0755	2	98	9.54286	Choline metabolism in cancer	http://www.genome.jp/kegg-bin/show_pathway?mmu05231	ENSMUSG00000024843, ENSMUSG00000021250
27	Upregulated	0.0777	2	109	9.21379	Toxoplasmosis	http://www.genome.jp/kegg-bin/show_pathway?mmu05145	ENSMUSG00000027111, ENSMUSG00000026478
28	Upregulated	0.0782	2	99	9.00674	Prostate cancer	http://www.genome.jp/kegg-bin/show_pathway?mmu05215	ENSMUSG00000023067, ENSMUSG00000020184
29	Upregulated	0.0887	2	113	8.26392	HIF-1 signaling pathway	http://www.genome.jp/kegg-bin/show_pathway?mmu04066	ENSMUSG00000023067, ENSMUSG00000005413
30	Upregulated	0.0924	2	113	7.70769	TNF signaling pathway	http://www.genome.jp/kegg-bin/show_pathway?mmu04668	ENSMUSG00000021250, ENSMUSG00000052837
31	Upregulated	0.0924	2	117	7.85882	Growth hormone synthesis secretion and action	http://www.genome.jp/kegg-bin/show_pathway?mmu04935	ENSMUSG00000021250, ENSMUSG00000052837
32	Upregulated	0.0924	1	27	36.4364	Maturity onset diabetes of the young	http://www.genome.jp/kegg-bin/show_pathway?mmu04950	ENSMUSG00000022528

## Sheet: 3uM_BP
	group	FDR	nGenes	Pathway size	Fold enriched	Pathway	URL	Genes
1	Upregulated	0.0036	11	1909	4.62234	Cellular response to stress	http://amigo.geneontology.org/amigo/term/GO:0033554	ENSMUSG00000040435, ENSMUSG00000023067, ENSMUSG00000042406, ENSMUSG00000005125, ENSMUSG00000005413, ENSMUSG00000015837, ENSMUSG00000028494, ENSMUSG00000030717, ENSMUSG00000032501, ENSMUSG00000021701, ENSMUSG00000073489
2	Upregulated	0.00363	4	109	29.6893	Intrinsic apoptotic signaling pathway in response to DNA damage	http://amigo.geneontology.org/amigo/term/GO:0008630	ENSMUSG00000005413, ENSMUSG00000023067, ENSMUSG00000030717, ENSMUSG00000073489
3	Upregulated	0.00363	13	3929	2.8953	Positive regulation of metabolic process	http://amigo.geneontology.org/amigo/term/GO:0009893	ENSMUSG00000032501, ENSMUSG00000038508, ENSMUSG00000040435, ENSMUSG00000073489, ENSMUSG00000090272, ENSMUSG00000042406, ENSMUSG00000000078, ENSMUSG00000015837, ENSMUSG00000021701, ENSMUSG00000023067, ENSMUSG00000030717, ENSMUSG00000052837, ENSMUSG00000005413
4	Upregulated	0.00363	6	576	9.72012	Response to extracellular stimulus	http://amigo.geneontology.org/amigo/term/GO:0009991	ENSMUSG00000038508, ENSMUSG00000042406, ENSMUSG00000005413, ENSMUSG00000023067, ENSMUSG00000028494, ENSMUSG00000073489
5	Upregulated	0.00363	6	541	10.342	Response to nutrient levels	http://amigo.geneontology.org/amigo/term/GO:0031667	ENSMUSG00000038508, ENSMUSG00000042406, ENSMUSG00000005413, ENSMUSG00000023067, ENSMUSG00000028494, ENSMUSG00000073489
6	Upregulated	0.00363	5	275	14.7245	Cellular response to extracellular stimulus	http://amigo.geneontology.org/amigo/term/GO:0031668	ENSMUSG00000042406, ENSMUSG00000005413, ENSMUSG00000023067, ENSMUSG00000028494, ENSMUSG00000073489
7	Upregulated	0.00363	5	239	16.7601	Cellular response to nutrient levels	http://amigo.geneontology.org/amigo/term/GO:0031669	ENSMUSG00000042406, ENSMUSG00000005413, ENSMUSG00000023067, ENSMUSG00000028494, ENSMUSG00000073489
8	Upregulated	0.00363	11	2517	3.79387	Intracellular signal transduction	http://amigo.geneontology.org/amigo/term/GO:0035556	ENSMUSG00000023067, ENSMUSG00000042406, ENSMUSG00000005125, ENSMUSG00000005413, ENSMUSG00000015837, ENSMUSG00000030717, ENSMUSG00000032501, ENSMUSG00000038508, ENSMUSG00000021701, ENSMUSG00000041313, ENSMUSG00000073489
9	Upregulated	0.00363	3	43	51.9563	Intrinsic apoptotic signaling pathway in response to DNA damage by p53 class mediator	http://amigo.geneontology.org/amigo/term/GO:0042771	ENSMUSG00000023067, ENSMUSG00000030717, ENSMUSG00000073489
10	Upregulated	0.00363	3	48	48.4926	Regulation of transcription from RNA polymerase II promoter in response to stress	http://amigo.geneontology.org/amigo/term/GO:0043618	ENSMUSG00000040435, ENSMUSG00000005413, ENSMUSG00000042406
11	Upregulated	0.00363	4	145	21.0837	Signal transduction by p53 class mediator	http://amigo.geneontology.org/amigo/term/GO:0072331	ENSMUSG00000023067, ENSMUSG00000005125, ENSMUSG00000030717, ENSMUSG00000073489
12	Upregulated	0.00363	5	301	13.1773	Intrinsic apoptotic signaling pathway	http://amigo.geneontology.org/amigo/term/GO:0097193	ENSMUSG00000042406, ENSMUSG00000005413, ENSMUSG00000030717, ENSMUSG00000023067, ENSMUSG00000073489
13	Upregulated	0.00369	3	52	45.4618	Regulation of DNA-templated transcription in response to stress	http://amigo.geneontology.org/amigo/term/GO:0043620	ENSMUSG00000040435, ENSMUSG00000005413, ENSMUSG00000042406
14	Upregulated	0.00431	10	2595	3.83442	Immune system process	http://amigo.geneontology.org/amigo/term/GO:0002376	ENSMUSG00000073489, ENSMUSG00000090272, ENSMUSG00000005125, ENSMUSG00000005413, ENSMUSG00000015837, ENSMUSG00000041313, ENSMUSG00000023067, ENSMUSG00000032501, ENSMUSG00000042406, ENSMUSG00000052837
15	Upregulated	0.00431	4	176	17.85	Cellular response to starvation	http://amigo.geneontology.org/amigo/term/GO:0009267	ENSMUSG00000042406, ENSMUSG00000023067, ENSMUSG00000028494, ENSMUSG00000073489
16	Upregulated	0.00431	3	56	38.9673	Cellular response to glucose starvation	http://amigo.geneontology.org/amigo/term/GO:0042149	ENSMUSG00000028494, ENSMUSG00000042406, ENSMUSG00000073489
17	Upregulated	0.00431	3	70	39.6758	Negative regulation of smooth muscle cell proliferation	http://amigo.geneontology.org/amigo/term/GO:0048662	ENSMUSG00000005413, ENSMUSG00000023067, ENSMUSG00000032501
18	Upregulated	0.00431	5	351	11.5093	Cellular response to external stimulus	http://amigo.geneontology.org/amigo/term/GO:0071496	ENSMUSG00000042406, ENSMUSG00000005413, ENSMUSG00000023067, ENSMUSG00000028494, ENSMUSG00000073489
19	Upregulated	0.00585	6	735	7.31044	Negative regulation of cell population proliferation	http://amigo.geneontology.org/amigo/term/GO:0008285	ENSMUSG00000030717, ENSMUSG00000005413, ENSMUSG00000023067, ENSMUSG00000032501, ENSMUSG00000005125, ENSMUSG00000040435
20	Upregulated	0.00585	8	1430	4.80125	Positive regulation of cellular protein metabolic process	http://amigo.geneontology.org/amigo/term/GO:0032270	ENSMUSG00000032501, ENSMUSG00000038508, ENSMUSG00000040435, ENSMUSG00000015837, ENSMUSG00000023067, ENSMUSG00000030717, ENSMUSG00000021701, ENSMUSG00000073489
21	Upregulated	0.00585	2	12	132.253	Regulation of transcription from RNA polymerase II promoter in response to oxidative stress	http://amigo.geneontology.org/amigo/term/GO:0043619	ENSMUSG00000005413, ENSMUSG00000042406
22	Upregulated	0.00597	9	1972	4.02366	Apoptotic process	http://amigo.geneontology.org/amigo/term/GO:0006915	ENSMUSG00000042406, ENSMUSG00000003541, ENSMUSG00000005413, ENSMUSG00000015837, ENSMUSG00000030717, ENSMUSG00000040435, ENSMUSG00000021701, ENSMUSG00000023067, ENSMUSG00000073489
23	Upregulated	0.00597	12	3834	2.84507	Response to stress	http://amigo.geneontology.org/amigo/term/GO:0006950	ENSMUSG00000005413, ENSMUSG00000040435, ENSMUSG00000073489, ENSMUSG00000090272, ENSMUSG00000023067, ENSMUSG00000042406, ENSMUSG00000005125, ENSMUSG00000015837, ENSMUSG00000028494, ENSMUSG00000030717, ENSMUSG00000032501, ENSMUSG00000021701
24	Upregulated	0.00597	4	214	15.2333	Response to starvation	http://amigo.geneontology.org/amigo/term/GO:0042594	ENSMUSG00000042406, ENSMUSG00000023067, ENSMUSG00000028494, ENSMUSG00000073489
25	Upregulated	0.00617	9	2102	3.98691	Cell population proliferation	http://amigo.geneontology.org/amigo/term/GO:0008283	ENSMUSG00000030717, ENSMUSG00000052837, ENSMUSG00000005125, ENSMUSG00000005413, ENSMUSG00000023067, ENSMUSG00000032501, ENSMUSG00000041313, ENSMUSG00000015837, ENSMUSG00000040435
26	Upregulated	0.00635	9	2026	3.92241	Programmed cell death	http://amigo.geneontology.org/amigo/term/GO:0012501	ENSMUSG00000042406, ENSMUSG00000003541, ENSMUSG00000005413, ENSMUSG00000015837, ENSMUSG00000030717, ENSMUSG00000040435, ENSMUSG00000021701, ENSMUSG00000023067, ENSMUSG00000073489
27	Upregulated	0.00635	7	1171	5.48086	Negative regulation of cell death	http://amigo.geneontology.org/amigo/term/GO:0060548	ENSMUSG00000003541, ENSMUSG00000005413, ENSMUSG00000030717, ENSMUSG00000042406, ENSMUSG00000021701, ENSMUSG00000023067, ENSMUSG00000040435
28	Upregulated	0.00641	10	2651	3.4327	Regulation of developmental process	http://amigo.geneontology.org/amigo/term/GO:0050793	ENSMUSG00000038508, ENSMUSG00000052837, ENSMUSG00000005413, ENSMUSG00000042406, ENSMUSG00000073489, ENSMUSG00000021701, ENSMUSG00000023067, ENSMUSG00000030717, ENSMUSG00000032501, ENSMUSG00000040435
29	Upregulated	0.00655	6	897	6.74549	Positive regulation of immune system process	http://amigo.geneontology.org/amigo/term/GO:0002684	ENSMUSG00000073489, ENSMUSG00000090272, ENSMUSG00000005413, ENSMUSG00000041313, ENSMUSG00000023067, ENSMUSG00000032501
30	Upregulated	0.00781	3	100	25.6725	Regulation of muscle cell apoptotic process	http://amigo.geneontology.org/amigo/term/GO:0010660	ENSMUSG00000005413, ENSMUSG00000030717, ENSMUSG00000042406
31	Upregulated	0.00871	11	3215	2.9341	Positive regulation of nitrogen compound metabolic process	http://amigo.geneontology.org/amigo/term/GO:0051173	ENSMUSG00000032501, ENSMUSG00000038508, ENSMUSG00000040435, ENSMUSG00000042406, ENSMUSG00000000078, ENSMUSG00000015837, ENSMUSG00000021701, ENSMUSG00000023067, ENSMUSG00000030717, ENSMUSG00000052837, ENSMUSG00000073489
32	Upregulated	0.00874	3	106	24.2463	Muscle cell apoptotic process	http://amigo.geneontology.org/amigo/term/GO:0010657	ENSMUSG00000005413, ENSMUSG00000030717, ENSMUSG00000042406
33	Upregulated	0.00876	8	1765	4.22287	Regulation of cell population proliferation	http://amigo.geneontology.org/amigo/term/GO:0042127	ENSMUSG00000030717, ENSMUSG00000052837, ENSMUSG00000005125, ENSMUSG00000005413, ENSMUSG00000023067, ENSMUSG00000032501, ENSMUSG00000041313, ENSMUSG00000040435
34	Upregulated	0.00989	9	2206	3.59303	Cell death	http://amigo.geneontology.org/amigo/term/GO:0008219	ENSMUSG00000042406, ENSMUSG00000003541, ENSMUSG00000005413, ENSMUSG00000015837, ENSMUSG00000030717, ENSMUSG00000040435, ENSMUSG00000021701, ENSMUSG00000023067, ENSMUSG00000073489
35	Upregulated	0.0102	2	19	76.5673	Positive regulation of cell migration involved in sprouting angiogenesis	http://amigo.geneontology.org/amigo/term/GO:0090050	ENSMUSG00000005413, ENSMUSG00000021701
36	Upregulated	0.0124	3	110	20.7825	Positive regulation of proteasomal protein catabolic process	http://amigo.geneontology.org/amigo/term/GO:1901800	ENSMUSG00000032501, ENSMUSG00000030717, ENSMUSG00000021701
37	Upregulated	0.016	5	595	7.08956	Positive regulation of programmed cell death	http://amigo.geneontology.org/amigo/term/GO:0043068	ENSMUSG00000030717, ENSMUSG00000005413, ENSMUSG00000023067, ENSMUSG00000042406, ENSMUSG00000040435
38	Upregulated	0.016	3	126	18.8118	Positive regulation of proteolysis involved in cellular protein catabolic process	http://amigo.geneontology.org/amigo/term/GO:1903052	ENSMUSG00000032501, ENSMUSG00000030717, ENSMUSG00000021701
39	Upregulated	0.0162	2	31	58.1911	Negative regulation of vascular associated smooth muscle cell proliferation	http://amigo.geneontology.org/amigo/term/GO:1904706	ENSMUSG00000005413, ENSMUSG00000023067
40	Upregulated	0.0209	5	609	6.58867	Apoptotic signaling pathway	http://amigo.geneontology.org/amigo/term/GO:0097190	ENSMUSG00000042406, ENSMUSG00000005413, ENSMUSG00000030717, ENSMUSG00000023067, ENSMUSG00000073489
41	Upregulated	0.0214	9	2831	3.16715	Response to external stimulus	http://amigo.geneontology.org/amigo/term/GO:0009605	ENSMUSG00000073489, ENSMUSG00000090272, ENSMUSG00000038508, ENSMUSG00000042406, ENSMUSG00000005413, ENSMUSG00000023067, ENSMUSG00000028494, ENSMUSG00000032501, ENSMUSG00000030717
42	Upregulated	0.0214	2	30	48.4926	Positive regulation of transcription by RNA polymerase I	http://amigo.geneontology.org/amigo/term/GO:0045943	ENSMUSG00000040435, ENSMUSG00000042406
43	Upregulated	0.0219	2	31	46.9283	Negative regulation of macroautophagy	http://amigo.geneontology.org/amigo/term/GO:0016242	ENSMUSG00000030717, ENSMUSG00000005413
44	Upregulated	0.0219	6	1055	4.99352	Positive regulation of protein modification process	http://amigo.geneontology.org/amigo/term/GO:0031401	ENSMUSG00000038508, ENSMUSG00000040435, ENSMUSG00000032501, ENSMUSG00000015837, ENSMUSG00000023067, ENSMUSG00000030717
45	Downregulated	0.00384	5	284	18.0344	Connective tissue development	http://amigo.geneontology.org/amigo/term/GO:0061448	ENSMUSG00000001131, ENSMUSG00000030218, ENSMUSG00000032363, ENSMUSG00000035783, ENSMUSG00000055435
46	Downregulated	0.0131	4	205	19.9512	Cartilage development	http://amigo.geneontology.org/amigo/term/GO:0051216	ENSMUSG00000001131, ENSMUSG00000030218, ENSMUSG00000032363, ENSMUSG00000055435
47	Downregulated	0.0131	2	11	174.573	Cellular response to UV-A	http://amigo.geneontology.org/amigo/term/GO:0071492	ENSMUSG00000001131, ENSMUSG00000043613
48	Downregulated	0.0161	5	536	9.57091	Skeletal system development	http://amigo.geneontology.org/amigo/term/GO:0001501	ENSMUSG00000001131, ENSMUSG00000030218, ENSMUSG00000032363, ENSMUSG00000021186, ENSMUSG00000055435
49	Downregulated	0.0161	3	107	29.0956	Integrin-mediated signaling pathway	http://amigo.geneontology.org/amigo/term/GO:0007229	ENSMUSG00000042284, ENSMUSG00000001131, ENSMUSG00000022817
50	Downregulated	0.0161	2	15	134.287	Response to UV-A	http://amigo.geneontology.org/amigo/term/GO:0070141	ENSMUSG00000001131, ENSMUSG00000043613
51	Downregulated	0.0914	7	2018	3.81879	Tissue development	http://amigo.geneontology.org/amigo/term/GO:0009888	ENSMUSG00000055435, ENSMUSG00000001131, ENSMUSG00000022817, ENSMUSG00000030218, ENSMUSG00000032363, ENSMUSG00000035783, ENSMUSG00000022816
52	Downregulated	0.0914	4	514	8.53659	Positive regulation of MAPK cascade	http://amigo.geneontology.org/amigo/term/GO:0043410	ENSMUSG00000035783, ENSMUSG00000042284, ENSMUSG00000017493, ENSMUSG00000026981
53	Downregulated	0.0914	1	3	872.867	Positive regulation of actin filament-based movement	http://amigo.geneontology.org/amigo/term/GO:1903116	ENSMUSG00000035783

## Sheet: 3uM_KEEG
	group	FDR	nGenes	Pathway size	Fold enriched	Pathway	URL	Genes
1	Downregulated	0.0294	2	88	20.04	ECM-receptor interaction	http://www.genome.jp/kegg-bin/show_pathway?mmu04512	ENSMUSG00000042284, ENSMUSG00000022817
2	Downregulated	0.0294	2	91	20.3108	Hypertrophic cardiomyopathy	http://www.genome.jp/kegg-bin/show_pathway?mmu05410	ENSMUSG00000042284, ENSMUSG00000022817
3	Downregulated	0.0294	2	77	24.2419	Arrhythmogenic right ventricular cardiomyopathy	http://www.genome.jp/kegg-bin/show_pathway?mmu05412	ENSMUSG00000042284, ENSMUSG00000022817
4	Downregulated	0.0294	2	94	19.7763	Dilated cardiomyopathy	http://www.genome.jp/kegg-bin/show_pathway?mmu05414	ENSMUSG00000042284, ENSMUSG00000022817
5	Downregulated	0.0912	2	212	9.82353	Transcriptional misregulation in cancer	http://www.genome.jp/kegg-bin/show_pathway?mmu05202	ENSMUSG00000055435, ENSMUSG00000043613
6	Downregulated	0.0962	2	200	8.12432	Focal adhesion	http://www.genome.jp/kegg-bin/show_pathway?mmu04510	ENSMUSG00000042284, ENSMUSG00000022817
7	Downregulated	0.0962	2	219	7.99468	Regulation of actin cytoskeleton	http://www.genome.jp/kegg-bin/show_pathway?mmu04810	ENSMUSG00000042284, ENSMUSG00000022817

## Sheet: BP 6h
CBD concentration	No of processes	BP
CBD_0.325 CBD_0.75 CBD_1.5 CBD_3	4	Cell population proliferation
		Immune system process
		Regulation of cell population proliferation
		Cellular response to stress
CBD_0.325 CBD_0.75 CBD_1.5	3	Cellular response to decreased oxygen levels
		Cellular response to hypoxia
		DNA damage response signal transduction by p53 class mediator
CBD_0.325 CBD_0.75 CBD_3	7	Positive regulation of programmed cell death
		Negative regulation of cell population proliferation
		Response to stress
		Apoptotic process
		Cell death
		Programmed cell death
		Signal transduction by p53 class mediator
CBD_0.325 CBD_1.5 CBD_3	1	Positive regulation of metabolic process
CBD_0.325 CBD_0.75	4	Negative regulation of molecular function
		Negative regulation of cellular protein metabolic process
		Cellular response to chemical stimulus
		Negative regulation of protein modification process
CBD_0.325 CBD_1.5	5	Blood vessel development
		Vasculature development
		DNA damage response signal transduction by p53 class mediator resulting in cell cycle arrest
		Response to hypoxia
		Regulation of vascular associated smooth muscle cell proliferation
CBD_0.325 CBD_3	2	Intracellular signal transduction
		Negative regulation of cell death
CBD_0.75 CBD_3	2	Regulation of DNA-templated transcription in response to stress
		Intrinsic apoptotic signaling pathway in response to DNA damage by p53 class mediator
CBD_1.5 CBD_3	7	Cellular response to nutrient levels
		Positive regulation of immune system process
		Cellular response to external stimulus
		Cellular response to extracellular stimulus
		Response to UV-A
		Cellular response to UV-A
		Negative regulation of vascular associated smooth muscle cell proliferation
CBD_0.325	17	Response to decreased oxygen levels
		Regulation of programmed cell death
		Positive regulation of protein oligomerization
		Cell migration involved in sprouting angiogenesis
		Regulation of ribonuclease activity
		Interleukin-27-mediated signaling pathway
		Circulatory system development
		Regulation of cell cycle
		Negative regulation of protein metabolic process
		Regulation of apoptotic process
		Regulation of molecular function
		Negative regulation of viral genome replication
		Cellular response to cytokine stimulus
		Regulation of cellular protein metabolic process
		Negative regulation of cellular metabolic process
		Response to virus
		Tube development
CBD_0.75	26	Oculomotor nerve development
		Response to inorganic substance
		Apoptotic mitochondrial changes
		Midbrain-hindbrain boundary morphogenesis
		Mitochondrion organization
		Regulation of cell growth
		Outflow tract morphogenesis
		Negative regulation of transcription from RNA polymerase II promoter in response to endoplasmic reticulum stress
		Regulation of skeletal muscle contraction by neural stimulation via neuromuscular junction
		Cell growth
		Trochlear nerve development
		Regulation of protein homooligomerization
		Response to corticotropin-releasing hormone
		Response to cytokine
		Response to abiotic stimulus
		Release of cytochrome c from mitochondria
		Leading edge cell differentiation
		Regulation of protein phosphorylation
		Cajal-Retzius cell differentiation
		Negative regulation of cell growth
		Peptidyl-serine dephosphorylation
		Response to endoplasmic reticulum stress
		Positive regulation of macromolecule metabolic process
		Positive regulation of neuron apoptotic process
		Positive regulation of apoptotic process
		Regulation of binding
CBD_1.5	25	Regulation of gene expression
		Muscle structure development
		Muscle cell proliferation
		Regulation of nucleobase-containing compound metabolic process
		Osteoclast differentiation
		Cellular response to ionizing radiation
		Regulation of smooth muscle cell proliferation
		Positive regulation of cell population proliferation
		Labyrinthine layer blood vessel development
		Negative regulation of macrophage migration
		Positive regulation of mononuclear cell proliferation
		Positive regulation of smooth muscle cell proliferation
		Cellular response to gamma radiation
		Mitotic G1/S transition checkpoint signaling
		Regulation of transcription by RNA polymerase II
		Response to immobilization stress
		Regulation of immune system process
		Response to oxygen levels
		Renal system vasculature development
		Positive regulation of transcription by RNA polymerase II
		Glomerulus vasculature development
		Positive regulation of lymphocyte proliferation
		Smooth muscle cell proliferation
		Mitotic G1 DNA damage checkpoint signaling
		Lipid droplet disassembly
CBD_3	30	Tissue development
		Positive regulation of cellular protein metabolic process
		Response to nutrient levels
		Positive regulation of proteasomal protein catabolic process
		Intrinsic apoptotic signaling pathway
		Positive regulation of transcription by RNA polymerase I
		Regulation of muscle cell apoptotic process
		Negative regulation of macroautophagy
		Regulation of transcription from RNA polymerase II promoter in response to oxidative stress
		Positive regulation of actin filament-based movement
		Response to starvation
		Muscle cell apoptotic process
		Regulation of developmental process
		Positive regulation of protein modification process
		Response to external stimulus
		Regulation of transcription from RNA polymerase II promoter in response to stress
		Connective tissue development
		Skeletal system development
		Positive regulation of MAPK cascade
		Cellular response to starvation
		Negative regulation of smooth muscle cell proliferation
		Cellular response to glucose starvation
		Apoptotic signaling pathway
		Positive regulation of nitrogen compound metabolic process
		Positive regulation of proteolysis involved in cellular protein catabolic process
		Integrin-mediated signaling pathway
		Positive regulation of cell migration involved in sprouting angiogenesis
		Cartilage development
		Intrinsic apoptotic signaling pathway in response to DNA damage
		Response to extracellular stimulus

## Sheet: KEEG 6h
CBD concentration	No of pathways	KEEG
CBD_0.325 CBD_0.75 CBD_1.5	9	Colorectal cancer
		Human papillomavirus infection
		Mitophagy-animal
		Pathways in cancer
		P53 signaling pathway
		Platinum drug resistance
		Epstein-Barr virus infection
		Breast cancer
		Osteoclast differentiation
CBD_0.325 CBD_1.5	12	Endocrine resistance
		Maturity onset diabetes of the young
		Melanoma
		Prostate cancer
		Small cell lung cancer
		Cellular senescence
		Bladder cancer
		HIF-1 signaling pathway
		MicroRNAs in cancer
		Glioma
		Chronic myeloid leukemia
		Fluid shear stress and atherosclerosis
CBD_0.325 CBD_3	1	Transcriptional misregulation in cancer
CBD_0.75 CBD_1.5	1	ErbB signaling pathway
CBD_1.5 CBD_3	1	ECM-receptor interaction
CBD_0.325	11	Cell cycle
		Gastric cancer
		Endometrial cancer
		FoxO signaling pathway
		Nitrogen metabolism
		Hepatocellular carcinoma
		Pancreatic cancer
		Thyroid cancer
		Basal cell carcinoma
		MAPK signaling pathway
		Non-small cell lung cancer
CBD_0.75	5	Amphetamine addiction
		Chagas disease
		Cocaine addiction
		Renal cell carcinoma
		IL-17 signaling pathway
CBD_1.5	9	Human T-cell leukemia virus 1 infection
		Parathyroid hormone synthesis secretion and action
		Choline metabolism in cancer
		Growth hormone synthesis secretion and action
		TNF signaling pathway
		Kaposi sarcoma-associated herpesvirus infection
		Toxoplasmosis
		PPAR signaling pathway
		PI3K-Akt signaling pathway
CBD_3	5	Regulation of actin cytoskeleton
		Focal adhesion
		Hypertrophic cardiomyopathy
		Arrhythmogenic right ventricular cardiomyopathy
		Dilated cardiomyopathy
