# Supplementary material for: Elucidating the transcriptomic response of adult-derived mHypoA-2/12 mouse hypothalamic neuron cell line to cannabidiol (CBD) exposure
Source: J Appl Genet. 2025 May 8;66(4):1029–51. doi: 10.1007/s13353-025-00970-8 (PMC12605594; doi:10.1007/s13353-025-00970-8)
Supplement: Supplementary file 6 — Supplementary file6 Altered genes (by all CBD concentrations separately at 6 h and 24 h treatments) overrepresentation tests in GO cellular components categories (XLSX 22 KB) [file 13353_2025_970_MOESM6_ESM.xlsx]

## Sheet: CBD0.325_6h_CC
	group	FDR	nGenes	Pathway size	Fold enriched	Pathway	URL	Genes
1	Upregulated	0.000937	17	4100	2.55759	Cytosol	http://amigo.geneontology.org/amigo/term/GO:0005829	ENSMUSG00000029561, ENSMUSG00000034459, ENSMUSG00000035692, ENSMUSG00000041827, ENSMUSG00000023067, ENSMUSG00000028972, ENSMUSG00000000078, ENSMUSG00000005125, ENSMUSG00000005413, ENSMUSG00000015837, ENSMUSG00000023034, ENSMUSG00000027803, ENSMUSG00000032402, ENSMUSG00000020184, ENSMUSG00000040435, ENSMUSG00000090272, ENSMUSG00000008348
2	Upregulated	0.0776	13	3729	2.09664	Nucleoplasm	http://amigo.geneontology.org/amigo/term/GO:0005654	ENSMUSG00000029561, ENSMUSG00000041827, ENSMUSG00000000078, ENSMUSG00000015837, ENSMUSG00000020184, ENSMUSG00000022528, ENSMUSG00000023034, ENSMUSG00000023067, ENSMUSG00000027803, ENSMUSG00000032402, ENSMUSG00000052837, ENSMUSG00000090272, ENSMUSG00000008348
3	Upregulated	0.0776	5	525	5.98603	Transcription regulator complex	http://amigo.geneontology.org/amigo/term/GO:0005667	ENSMUSG00000023034, ENSMUSG00000032402, ENSMUSG00000052837, ENSMUSG00000027803, ENSMUSG00000020184
4	Upregulated	0.0776	14	4247	2.02248	Nuclear lumen	http://amigo.geneontology.org/amigo/term/GO:0031981	ENSMUSG00000029561, ENSMUSG00000041827, ENSMUSG00000090272, ENSMUSG00000020184, ENSMUSG00000000078, ENSMUSG00000005413, ENSMUSG00000015837, ENSMUSG00000022528, ENSMUSG00000023034, ENSMUSG00000023067, ENSMUSG00000027803, ENSMUSG00000032402, ENSMUSG00000052837, ENSMUSG00000008348
5	Upregulated	0.0824	1	2	268.773	PCNA-p21 complex	http://amigo.geneontology.org/amigo/term/GO:0070557	ENSMUSG00000023067
6	Upregulated	0.0824	1	2	268.773	PUMA-BCL-xl complex	http://amigo.geneontology.org/amigo/term/GO:0097143	ENSMUSG00000002083
7	Upregulated	0.085	6	975	3.49434	Nucleolus	http://amigo.geneontology.org/amigo/term/GO:0005730	ENSMUSG00000090272, ENSMUSG00000020184, ENSMUSG00000000078, ENSMUSG00000005413, ENSMUSG00000023067, ENSMUSG00000041827
8	Upregulated	0.085	14	4778	1.7991	Membrane-enclosed lumen	http://amigo.geneontology.org/amigo/term/GO:0031974	ENSMUSG00000029561, ENSMUSG00000041827, ENSMUSG00000090272, ENSMUSG00000020184, ENSMUSG00000000078, ENSMUSG00000005413, ENSMUSG00000015837, ENSMUSG00000022528, ENSMUSG00000023034, ENSMUSG00000023067, ENSMUSG00000027803, ENSMUSG00000032402, ENSMUSG00000052837, ENSMUSG00000008348
9	Upregulated	0.085	14	4778	1.7991	Organelle lumen	http://amigo.geneontology.org/amigo/term/GO:0043233	ENSMUSG00000029561, ENSMUSG00000041827, ENSMUSG00000090272, ENSMUSG00000020184, ENSMUSG00000000078, ENSMUSG00000005413, ENSMUSG00000015837, ENSMUSG00000022528, ENSMUSG00000023034, ENSMUSG00000023067, ENSMUSG00000027803, ENSMUSG00000032402, ENSMUSG00000052837, ENSMUSG00000008348
10	Upregulated	0.085	14	4777	1.7991	Intracellular organelle lumen	http://amigo.geneontology.org/amigo/term/GO:0070013	ENSMUSG00000029561, ENSMUSG00000041827, ENSMUSG00000090272, ENSMUSG00000020184, ENSMUSG00000000078, ENSMUSG00000005413, ENSMUSG00000015837, ENSMUSG00000022528, ENSMUSG00000023034, ENSMUSG00000023067, ENSMUSG00000027803, ENSMUSG00000032402, ENSMUSG00000052837, ENSMUSG00000008348

## Sheet: CBD0.75_6h_CC
	group	FDR	nGenes	Pathway size	Fold enriched	Pathway	URL	Genes
1	Upregulated	0.0129	12	4100	2.64786	Cytosol	http://amigo.geneontology.org/amigo/term/GO:0005829	ENSMUSG00000009630, ENSMUSG00000041827, ENSMUSG00000062997, ENSMUSG00000023067, ENSMUSG00000028972, ENSMUSG00000005125, ENSMUSG00000015837, ENSMUSG00000022048, ENSMUSG00000023034, ENSMUSG00000052684, ENSMUSG00000040435, ENSMUSG00000090272
2	Upregulated	0.0669	2	51	33.5489	Protein serine/threonine phosphatase complex	http://amigo.geneontology.org/amigo/term/GO:0008287	ENSMUSG00000040435, ENSMUSG00000009630
3	Upregulated	0.0669	1	2	394.2	PCNA-p21 complex	http://amigo.geneontology.org/amigo/term/GO:0070557	ENSMUSG00000023067
4	Upregulated	0.0669	1	2	394.2	PUMA-BCL-xl complex	http://amigo.geneontology.org/amigo/term/GO:0097143	ENSMUSG00000002083
5	Upregulated	0.0669	2	52	32.85	Phosphatase complex	http://amigo.geneontology.org/amigo/term/GO:1903293	ENSMUSG00000040435, ENSMUSG00000009630
6	Downregulated	0.000347	7	505	9.47813	External encapsulating structure	http://amigo.geneontology.org/amigo/term/GO:0030312	ENSMUSG00000028364, ENSMUSG00000041891, ENSMUSG00000001131, ENSMUSG00000023885, ENSMUSG00000030218, ENSMUSG00000043613, ENSMUSG00000050578
7	Downregulated	0.000347	7	503	9.50207	Extracellular matrix	http://amigo.geneontology.org/amigo/term/GO:0031012	ENSMUSG00000028364, ENSMUSG00000041891, ENSMUSG00000001131, ENSMUSG00000023885, ENSMUSG00000030218, ENSMUSG00000043613, ENSMUSG00000050578
8	Downregulated	0.00863	5	373	8.95909	Collagen-containing extracellular matrix	http://amigo.geneontology.org/amigo/term/GO:0062023	ENSMUSG00000028364, ENSMUSG00000041891, ENSMUSG00000023885, ENSMUSG00000001131, ENSMUSG00000030218
9	Downregulated	0.0232	3	115	17.1557	Basement membrane	http://amigo.geneontology.org/amigo/term/GO:0005604	ENSMUSG00000001131, ENSMUSG00000023885, ENSMUSG00000028364
10	Downregulated	0.0671	8	2503	2.88615	Extracellular region	http://amigo.geneontology.org/amigo/term/GO:0005576	ENSMUSG00000001131, ENSMUSG00000003617, ENSMUSG00000059187, ENSMUSG00000028364, ENSMUSG00000023885, ENSMUSG00000030218, ENSMUSG00000045328, ENSMUSG00000050578
11	Downregulated	0.0671	1	3	268.773	Tenascin complex	http://amigo.geneontology.org/amigo/term/GO:0090733	ENSMUSG00000028364
12	Downregulated	0.0671	1	2	268.773	Chromosome subtelomeric region	http://amigo.geneontology.org/amigo/term/GO:0099115	ENSMUSG00000031229
13	Downregulated	0.0671	1	2	268.773	Amyloid-beta complex	http://amigo.geneontology.org/amigo/term/GO:0106003	ENSMUSG00000024290
14	Downregulated	0.0854	1	6	179.182	Perisynaptic extracellular matrix	http://amigo.geneontology.org/amigo/term/GO:0098966	ENSMUSG00000028364

## Sheet: CBD1.5_6h_CC
	group	FDR	nGenes	Pathway size	Fold enriched	Pathway	URL	Genes
1	Upregulated	0.00566	2	5	197.1	Transcription factor AP-1 complex	http://amigo.geneontology.org/amigo/term/GO:0035976	ENSMUSG00000021250, ENSMUSG00000052837
2	Downregulated	0.0064	9	1714	4.69804	Extracellular space	http://amigo.geneontology.org/amigo/term/GO:0005615	ENSMUSG00000001131, ENSMUSG00000029163, ENSMUSG00000033307, ENSMUSG00000037379, ENSMUSG00000026981, ENSMUSG00000059187, ENSMUSG00000035413, ENSMUSG00000040026, ENSMUSG00000025289
3	Downregulated	0.0145	10	2503	3.45083	Extracellular region	http://amigo.geneontology.org/amigo/term/GO:0005576	ENSMUSG00000001131, ENSMUSG00000029163, ENSMUSG00000033307, ENSMUSG00000037379, ENSMUSG00000026981, ENSMUSG00000059187, ENSMUSG00000035413, ENSMUSG00000040026, ENSMUSG00000025289, ENSMUSG00000058135

## Sheet: CBD3_6h_CC
	group	FDR	nGenes	Pathway size	Fold enriched	Pathway	URL	Genes
1	Upregulated	0.00488	2	7	211.179	Lewy body	http://amigo.geneontology.org/amigo/term/GO:0097413	ENSMUSG00000015837, ENSMUSG00000042406
2	Upregulated	0.00656	3	79	32.6085	Inclusion body	http://amigo.geneontology.org/amigo/term/GO:0016234	ENSMUSG00000015837, ENSMUSG00000073489, ENSMUSG00000042406
3	Upregulated	0.0736	1	2	369.562	PCNA-p21 complex	http://amigo.geneontology.org/amigo/term/GO:0070557	ENSMUSG00000023067
4	Upregulated	0.0736	1	2	369.562	ATF1-ATF4 transcription factor complex	http://amigo.geneontology.org/amigo/term/GO:1990590	ENSMUSG00000042406
5	Upregulated	0.0736	1	3	369.562	CHOP-ATF4 complex	http://amigo.geneontology.org/amigo/term/GO:1990617	ENSMUSG00000042406
6	Upregulated	0.0742	11	4704	2.04332	Non-membrane-bounded organelle	http://amigo.geneontology.org/amigo/term/GO:0043228	ENSMUSG00000021701, ENSMUSG00000028494, ENSMUSG00000062997, ENSMUSG00000073489, ENSMUSG00000090272, ENSMUSG00000000078, ENSMUSG00000005125, ENSMUSG00000005413, ENSMUSG00000015837, ENSMUSG00000023067, ENSMUSG00000042406
7	Upregulated	0.0742	11	4703	2.04332	Intracellular non-membrane-bounded organelle	http://amigo.geneontology.org/amigo/term/GO:0043232	ENSMUSG00000021701, ENSMUSG00000028494, ENSMUSG00000062997, ENSMUSG00000073489, ENSMUSG00000090272, ENSMUSG00000000078, ENSMUSG00000005125, ENSMUSG00000005413, ENSMUSG00000015837, ENSMUSG00000023067, ENSMUSG00000042406
8	Upregulated	0.0742	1	3	246.375	Lewy body core	http://amigo.geneontology.org/amigo/term/GO:1990037	ENSMUSG00000042406
9	Upregulated	0.0816	1	4	184.781	ATF4-CREB1 transcription factor complex	http://amigo.geneontology.org/amigo/term/GO:1990589	ENSMUSG00000042406
10	Upregulated	0.0822	5	975	4.00393	Nucleolus	http://amigo.geneontology.org/amigo/term/GO:0005730	ENSMUSG00000073489, ENSMUSG00000090272, ENSMUSG00000000078, ENSMUSG00000005413, ENSMUSG00000023067
11	Upregulated	0.0834	1	5	147.825	Transcription factor AP-1 complex	http://amigo.geneontology.org/amigo/term/GO:0035976	ENSMUSG00000052837
12	Upregulated	0.085	10	4100	2.06864	Cytosol	http://amigo.geneontology.org/amigo/term/GO:0005829	ENSMUSG00000028494, ENSMUSG00000062997, ENSMUSG00000023067, ENSMUSG00000000078, ENSMUSG00000005125, ENSMUSG00000005413, ENSMUSG00000015837, ENSMUSG00000040435, ENSMUSG00000073489, ENSMUSG00000090272
13	Downregulated	0.00331	7	1714	5.60284	Extracellular space	http://amigo.geneontology.org/amigo/term/GO:0005615	ENSMUSG00000001131, ENSMUSG00000017493, ENSMUSG00000021186, ENSMUSG00000022816, ENSMUSG00000026981, ENSMUSG00000035413, ENSMUSG00000030218
14	Downregulated	0.00331	5	505	9.92947	External encapsulating structure	http://amigo.geneontology.org/amigo/term/GO:0030312	ENSMUSG00000021186, ENSMUSG00000001131, ENSMUSG00000030218, ENSMUSG00000032363, ENSMUSG00000043613
15	Downregulated	0.00331	5	503	9.95455	Extracellular matrix	http://amigo.geneontology.org/amigo/term/GO:0031012	ENSMUSG00000021186, ENSMUSG00000001131, ENSMUSG00000030218, ENSMUSG00000032363, ENSMUSG00000043613
16	Downregulated	0.00454	8	2503	4.23302	Extracellular region	http://amigo.geneontology.org/amigo/term/GO:0005576	ENSMUSG00000001131, ENSMUSG00000017493, ENSMUSG00000021186, ENSMUSG00000022816, ENSMUSG00000026981, ENSMUSG00000035413, ENSMUSG00000030218, ENSMUSG00000032363
17	Downregulated	0.0107	2	32	58.4	Integrin complex	http://amigo.geneontology.org/amigo/term/GO:0008305	ENSMUSG00000042284, ENSMUSG00000022817
18	Downregulated	0.0258	2	55	34.2783	Protein complex involved in cell adhesion	http://amigo.geneontology.org/amigo/term/GO:0098636	ENSMUSG00000042284, ENSMUSG00000022817
19	Downregulated	0.0326	1	2	394.2	Integrin alpha1-beta1 complex	http://amigo.geneontology.org/amigo/term/GO:0034665	ENSMUSG00000042284
20	Downregulated	0.0326	1	2	394.2	Integrin alphav-beta5 complex	http://amigo.geneontology.org/amigo/term/GO:0034684	ENSMUSG00000022817
21	Downregulated	0.0435	1	4	262.8	Smooth muscle contractile fiber	http://amigo.geneontology.org/amigo/term/GO:0030485	ENSMUSG00000035783
22	Downregulated	0.0592	3	373	7.884	Collagen-containing extracellular matrix	http://amigo.geneontology.org/amigo/term/GO:0062023	ENSMUSG00000021186, ENSMUSG00000001131, ENSMUSG00000030218
23	Downregulated	0.0592	1	5	157.68	Elastic fiber	http://amigo.geneontology.org/amigo/term/GO:0071953	ENSMUSG00000021186
24	Downregulated	0.0871	2	174	12.9246	Plasma membrane signaling receptor complex	http://amigo.geneontology.org/amigo/term/GO:0098802	ENSMUSG00000042284, ENSMUSG00000022817

## Sheet: CC 6h common
Names	total	elements
CBD_0.325 CBD_0.75 CBD_3	2	Cytosol
		PCNA-p21 complex
CBD_0.75 CBD_1.5 CBD_3	1	Extracellular region
CBD_0.325 CBD_0.75	1	PUMA-BCL-xl complex
CBD_0.325 CBD_3	1	Nucleolus
CBD_0.75 CBD_3	3	Extracellular matrix
		Collagen-containing extracellular matrix
		External encapsulating structure
CBD_1.5 CBD_3	2	Transcription factor AP-1 complex
		Extracellular space
CBD_0.325	6	Nucleoplasm
		Intracellular organelle lumen
		Organelle lumen
		Nuclear lumen
		Transcription regulator complex
		Membrane-enclosed lumen
CBD_0.75	7	Amyloid-beta complex
		Chromosome subtelomeric region
		Tenascin complex
		Protein serine/threonine phosphatase complex
		Phosphatase complex
		Perisynaptic extracellular matrix
		Basement membrane
CBD_3	15	Inclusion body
		Integrin alphav-beta5 complex
		Non-membrane-bounded organelle
		Integrin complex
		ATF1-ATF4 transcription factor complex
		Integrin alpha1-beta1 complex
		Lewy body
		Protein complex involved in cell adhesion
		Smooth muscle contractile fiber
		Elastic fiber
		Plasma membrane signaling receptor complex
		CHOP-ATF4 complex
		ATF4-CREB1 transcription factor complex
		Intracellular non-membrane-bounded organelle
		Lewy body core

## Sheet: CBD0.325_24h_CC
	group	FDR	nGenes	Pathway size	Fold enriched	Pathway	URL	Genes
1	Upregulated	0.0159	2	50	47.3833	Mitochondrial respiratory chain complex I	http://amigo.geneontology.org/amigo/term/GO:0005747	ENSMUSG00000064367, ENSMUSG00000064363
2	Upregulated	0.0159	2	50	47.3833	NADH dehydrogenase complex	http://amigo.geneontology.org/amigo/term/GO:0030964	ENSMUSG00000064367, ENSMUSG00000064363
3	Upregulated	0.0159	2	50	47.3833	Respiratory chain complex I	http://amigo.geneontology.org/amigo/term/GO:0045271	ENSMUSG00000064367, ENSMUSG00000064363
4	Upregulated	0.0276	2	90	27.4024	Mitochondrial respirasome	http://amigo.geneontology.org/amigo/term/GO:0005746	ENSMUSG00000064367, ENSMUSG00000064363
5	Upregulated	0.0276	2	98	25.2711	Respirasome	http://amigo.geneontology.org/amigo/term/GO:0070469	ENSMUSG00000064367, ENSMUSG00000064363
6	Upregulated	0.0276	2	90	27.4024	Respiratory chain complex	http://amigo.geneontology.org/amigo/term/GO:0098803	ENSMUSG00000064367, ENSMUSG00000064363
7	Upregulated	0.0377	2	122	19.9509	Oxidoreductase complex	http://amigo.geneontology.org/amigo/term/GO:1990204	ENSMUSG00000064367, ENSMUSG00000064363
8	Upregulated	0.0506	2	150	16.0169	Inner mitochondrial membrane protein complex	http://amigo.geneontology.org/amigo/term/GO:0098800	ENSMUSG00000064367, ENSMUSG00000064363
9	Upregulated	0.0612	5	1902	3.41297	Mitochondrion	http://amigo.geneontology.org/amigo/term/GO:0005739	ENSMUSG00000001829, ENSMUSG00000029455, ENSMUSG00000064363, ENSMUSG00000064367, ENSMUSG00000040459
10	Upregulated	0.0996	2	374	10.0194	Transmembrane transporter complex	http://amigo.geneontology.org/amigo/term/GO:1902495	ENSMUSG00000064367, ENSMUSG00000064363
11	Downregulated	0.09	5	1714	4.84905	Extracellular space	http://amigo.geneontology.org/amigo/term/GO:0005615	ENSMUSG00000026822, ENSMUSG00000026981, ENSMUSG00000040026, ENSMUSG00000061353, ENSMUSG00000050578
12	Downregulated	0.09	1	3	291.59	Nascent polypeptide-associated complex	http://amigo.geneontology.org/amigo/term/GO:0005854	ENSMUSG00000061315
13	Downregulated	0.09	3	528	6.71178	Cell-cell junction	http://amigo.geneontology.org/amigo/term/GO:0005911	ENSMUSG00000032531, ENSMUSG00000022836, ENSMUSG00000050578
14	Downregulated	0.09	1	20	109.346	Vesicle lumen	http://amigo.geneontology.org/amigo/term/GO:0031983	ENSMUSG00000026822
15	Downregulated	0.09	1	10	109.346	Intercellular canaliculus	http://amigo.geneontology.org/amigo/term/GO:0046581	ENSMUSG00000050578
16	Downregulated	0.09	1	18	124.967	Cytoplasmic vesicle lumen	http://amigo.geneontology.org/amigo/term/GO:0060205	ENSMUSG00000026822
17	Downregulated	0.09	1	6	145.795	GATOR1 complex	http://amigo.geneontology.org/amigo/term/GO:1990130	ENSMUSG00000070934
18	Downregulated	0.09	1	3	291.59	Gtr1-Gtr2 GTPase complex	http://amigo.geneontology.org/amigo/term/GO:1990131	ENSMUSG00000070934

## Sheet: CBD_0.75_24h_CC
NA

## Sheet: CBD_1.5_24h_CC
NA

## Sheet: CBD_3_24h_CC
	group	FDR	nGenes	Pathway size	Fold enriched	Pathway	URL	Genes
1	Downregulated	0.0664	1	6	631.778	Elongator holoenzyme complex	http://amigo.geneontology.org/amigo/term/GO:0033588	ENSMUSG00000054836
2	Downregulated	0.0834	1	93	41.6557	Organellar ribosome	http://amigo.geneontology.org/amigo/term/GO:0000313	ENSMUSG00000039680
3	Downregulated	0.0834	1	32	122.28	Organellar small ribosomal subunit	http://amigo.geneontology.org/amigo/term/GO:0000314	ENSMUSG00000039680
4	Downregulated	0.0834	1	82	52.6481	Stress fiber	http://amigo.geneontology.org/amigo/term/GO:0001725	ENSMUSG00000022836
5	Downregulated	0.0834	1	93	41.6557	Mitochondrial ribosome	http://amigo.geneontology.org/amigo/term/GO:0005761	ENSMUSG00000039680
6	Downregulated	0.0834	1	32	122.28	Mitochondrial small ribosomal subunit	http://amigo.geneontology.org/amigo/term/GO:0005763	ENSMUSG00000039680
7	Downregulated	0.0834	1	83	47.3833	Small ribosomal subunit	http://amigo.geneontology.org/amigo/term/GO:0015935	ENSMUSG00000039680
8	Downregulated	0.0834	1	74	59.2292	Cell division site	http://amigo.geneontology.org/amigo/term/GO:0032153	ENSMUSG00000022836
9	Downregulated	0.0834	1	56	77.3605	Cleavage furrow	http://amigo.geneontology.org/amigo/term/GO:0032154	ENSMUSG00000022836
10	Downregulated	0.0834	1	91	46.7984	Actin filament bundle	http://amigo.geneontology.org/amigo/term/GO:0032432	ENSMUSG00000022836
11	Downregulated	0.0834	1	91	46.7984	Actomyosin	http://amigo.geneontology.org/amigo/term/GO:0042641	ENSMUSG00000022836
12	Downregulated	0.0834	1	82	52.6481	Contractile actin filament bundle	http://amigo.geneontology.org/amigo/term/GO:0097517	ENSMUSG00000022836

## Sheet: CC 24h common
Names	total	elements
CBD_0.325	18	Mitochondrial respirasome
		Mitochondrion
		GATOR1 complex
		Oxidoreductase complex
		Cytoplasmic vesicle lumen
		Vesicle lumen
		Extracellular space
		Transmembrane transporter complex
		Mitochondrial respiratory chain complex I
		Respirasome
		Nascent polypeptide-associated complex
		Cell-cell junction
		Respiratory chain complex
		Gtr1-Gtr2 GTPase complex
		NADH dehydrogenase complex
		Respiratory chain complex I
		Inner mitochondrial membrane protein complex
		Intercellular canaliculus
CBD_3	12	Cleavage furrow
		Stress fiber
		Small ribosomal subunit
		Elongator holoenzyme complex
		Actin filament bundle
		Organellar ribosome
		Organellar small ribosomal subunit
		Mitochondrial small ribosomal subunit
		Mitochondrial ribosome
		Cell division site
		Contractile actin filament bundle
		Actomyosin
