# Supplementary material for: Elucidating the transcriptomic response of adult-derived mHypoA-2/12 mouse hypothalamic neuron cell line to cannabidiol (CBD) exposure
Source: J Appl Genet. 2025 May 8;66(4):1029–51. doi: 10.1007/s13353-025-00970-8 (PMC12605594; doi:10.1007/s13353-025-00970-8)
Supplement: Supplementary file 8 — Supplementary file8 Altered genes (by all CBD concentrations separately at 24 h treatment) overrepresentation tests in GO biological processes and KEEG pathways categories (including comparative reanalysis of processes/pathways) (XLSX 438 KB) [file 13353_2025_970_MOESM8_ESM.xlsx]

## Sheet: 0.325uM_BP 24h
	group	FDR	nGenes	Pathway size	Fold enriched	Pathway	URL	Genes
1	Upregulated	0.000806	2	5	627.1	Energy coupled proton transmembrane transport against electrochemical gradient	http://amigo.geneontology.org/amigo/term/GO:0015988	ENSMUSG00000064363, ENSMUSG00000064367
2	Upregulated	0.000806	2	5	627.1	Electron transport coupled proton transport	http://amigo.geneontology.org/amigo/term/GO:0015990	ENSMUSG00000064363, ENSMUSG00000064367
3	Upregulated	0.0202	2	28	111.982	Mitochondrial electron transport NADH to ubiquinone	http://amigo.geneontology.org/amigo/term/GO:0006120	ENSMUSG00000064363, ENSMUSG00000064367
4	Upregulated	0.0426	2	59	54.0603	NADH dehydrogenase complex assembly	http://amigo.geneontology.org/amigo/term/GO:0010257	ENSMUSG00000064363, ENSMUSG00000064367
5	Upregulated	0.0426	2	70	46.7985	Proton motive force-driven ATP synthesis	http://amigo.geneontology.org/amigo/term/GO:0015986	ENSMUSG00000064363, ENSMUSG00000064367
6	Upregulated	0.0426	2	67	49.7698	Aerobic electron transport chain	http://amigo.geneontology.org/amigo/term/GO:0019646	ENSMUSG00000064363, ENSMUSG00000064367
7	Upregulated	0.0426	2	59	54.0603	Mitochondrial respiratory chain complex I assembly	http://amigo.geneontology.org/amigo/term/GO:0032981	ENSMUSG00000064363, ENSMUSG00000064367
8	Upregulated	0.0426	2	80	42.3716	ATP synthesis coupled electron transport	http://amigo.geneontology.org/amigo/term/GO:0042773	ENSMUSG00000064363, ENSMUSG00000064367
9	Upregulated	0.0426	2	78	42.3716	Mitochondrial ATP synthesis coupled electron transport	http://amigo.geneontology.org/amigo/term/GO:0042775	ENSMUSG00000064363, ENSMUSG00000064367
10	Upregulated	0.0426	2	63	51.4016	Proton motive force-driven mitochondrial ATP synthesis	http://amigo.geneontology.org/amigo/term/GO:0042776	ENSMUSG00000064363, ENSMUSG00000064367
11	Upregulated	0.0438	1	2	783.875	Acetaldehyde metabolic process	http://amigo.geneontology.org/amigo/term/GO:0006117	ENSMUSG00000029455
12	Upregulated	0.0438	2	107	31.355	ATP biosynthetic process	http://amigo.geneontology.org/amigo/term/GO:0006754	ENSMUSG00000064363, ENSMUSG00000064367
13	Upregulated	0.0438	2	135	25.7008	Nucleoside triphosphate biosynthetic process	http://amigo.geneontology.org/amigo/term/GO:0009142	ENSMUSG00000064363, ENSMUSG00000064367
14	Upregulated	0.0438	2	119	29.0324	Purine nucleoside triphosphate biosynthetic process	http://amigo.geneontology.org/amigo/term/GO:0009145	ENSMUSG00000064363, ENSMUSG00000064367
15	Upregulated	0.0438	2	124	27.7478	Ribonucleoside triphosphate biosynthetic process	http://amigo.geneontology.org/amigo/term/GO:0009201	ENSMUSG00000064363, ENSMUSG00000064367
16	Upregulated	0.0438	2	136	25.2863	Purine ribonucleoside triphosphate metabolic process	http://amigo.geneontology.org/amigo/term/GO:0009205	ENSMUSG00000064363, ENSMUSG00000064367
17	Upregulated	0.0438	2	118	29.3037	Purine ribonucleoside triphosphate biosynthetic process	http://amigo.geneontology.org/amigo/term/GO:0009206	ENSMUSG00000064363, ENSMUSG00000064367
18	Upregulated	0.0438	2	131	26.7991	Electron transport chain	http://amigo.geneontology.org/amigo/term/GO:0022900	ENSMUSG00000064363, ENSMUSG00000064367
19	Upregulated	0.0438	2	105	32.3247	Respiratory electron transport chain	http://amigo.geneontology.org/amigo/term/GO:0022904	ENSMUSG00000064363, ENSMUSG00000064367
20	Upregulated	0.0438	2	96	34.0815	Mitochondrial respiratory chain complex assembly	http://amigo.geneontology.org/amigo/term/GO:0033108	ENSMUSG00000064363, ENSMUSG00000064367
21	Upregulated	0.0438	1	7	391.938	Serotonin biosynthetic process	http://amigo.geneontology.org/amigo/term/GO:0042427	ENSMUSG00000029455
22	Upregulated	0.0438	2	153	27.9955	Response to ethanol	http://amigo.geneontology.org/amigo/term/GO:0045471	ENSMUSG00000064363, ENSMUSG00000029455
23	Upregulated	0.0438	1	3	522.583	Lymphatic endothelial cell fate commitment	http://amigo.geneontology.org/amigo/term/GO:0060838	ENSMUSG00000030551
24	Upregulated	0.0438	1	7	391.938	Primary amino compound biosynthetic process	http://amigo.geneontology.org/amigo/term/GO:1901162	ENSMUSG00000029455
25	Upregulated	0.0438	2	133	31.6717	Proton transmembrane transport	http://amigo.geneontology.org/amigo/term/GO:1902600	ENSMUSG00000064363, ENSMUSG00000064367
26	Upregulated	0.0438	1	4	391.938	Regulation of dopamine biosynthetic process	http://amigo.geneontology.org/amigo/term/GO:1903179	ENSMUSG00000029455
27	Upregulated	0.0438	1	3	783.875	Regulation of serotonin biosynthetic process	http://amigo.geneontology.org/amigo/term/GO:1905627	ENSMUSG00000029455
28	Upregulated	0.0446	2	143	23.7538	Oxidative phosphorylation	http://amigo.geneontology.org/amigo/term/GO:0006119	ENSMUSG00000064363, ENSMUSG00000064367
29	Upregulated	0.0446	2	144	23.7538	Purine nucleoside triphosphate metabolic process	http://amigo.geneontology.org/amigo/term/GO:0009144	ENSMUSG00000064363, ENSMUSG00000064367
30	Upregulated	0.0446	2	144	24.1192	Ribonucleoside triphosphate metabolic process	http://amigo.geneontology.org/amigo/term/GO:0009199	ENSMUSG00000064363, ENSMUSG00000064367
31	Upregulated	0.0451	1	8	313.55	Indole-containing compound biosynthetic process	http://amigo.geneontology.org/amigo/term/GO:0042435	ENSMUSG00000029455
32	Upregulated	0.0451	1	12	313.55	Behavioral response to ethanol	http://amigo.geneontology.org/amigo/term/GO:0048149	ENSMUSG00000029455
33	Upregulated	0.0509	1	8	261.292	Lymphatic endothelial cell differentiation	http://amigo.geneontology.org/amigo/term/GO:0060836	ENSMUSG00000030551
34	Upregulated	0.0509	1	7	261.292	Endothelial cell fate commitment	http://amigo.geneontology.org/amigo/term/GO:0060839	ENSMUSG00000030551
35	Upregulated	0.0511	2	169	20.4935	Nucleoside triphosphate metabolic process	http://amigo.geneontology.org/amigo/term/GO:0009141	ENSMUSG00000064363, ENSMUSG00000064367
36	Upregulated	0.0531	1	18	223.964	Ethanol metabolic process	http://amigo.geneontology.org/amigo/term/GO:0006067	ENSMUSG00000029455
37	Upregulated	0.0531	1	15	223.964	Ethanol catabolic process	http://amigo.geneontology.org/amigo/term/GO:0006068	ENSMUSG00000029455
38	Upregulated	0.0531	1	16	223.964	Interneuron migration	http://amigo.geneontology.org/amigo/term/GO:1904936	ENSMUSG00000030551
39	Upregulated	0.0576	2	197	18.2297	Aerobic respiration	http://amigo.geneontology.org/amigo/term/GO:0009060	ENSMUSG00000064363, ENSMUSG00000064367
40	Upregulated	0.0577	1	16	195.969	Primary alcohol catabolic process	http://amigo.geneontology.org/amigo/term/GO:0034310	ENSMUSG00000029455
41	Upregulated	0.059	2	210	17.0408	Purine ribonucleotide biosynthetic process	http://amigo.geneontology.org/amigo/term/GO:0009152	ENSMUSG00000064363, ENSMUSG00000064367
42	Upregulated	0.059	1	16	174.194	Dopamine biosynthetic process	http://amigo.geneontology.org/amigo/term/GO:0042416	ENSMUSG00000029455
43	Upregulated	0.059	1	16	174.194	Serotonin metabolic process	http://amigo.geneontology.org/amigo/term/GO:0042428	ENSMUSG00000029455
44	Upregulated	0.059	1	10	174.194	Cellular detoxification of aldehyde	http://amigo.geneontology.org/amigo/term/GO:0110095	ENSMUSG00000029455
45	Upregulated	0.061	2	230	16.0795	Purine nucleotide biosynthetic process	http://amigo.geneontology.org/amigo/term/GO:0006164	ENSMUSG00000064363, ENSMUSG00000064367
46	Upregulated	0.061	2	224	15.8359	Ribonucleotide biosynthetic process	http://amigo.geneontology.org/amigo/term/GO:0009260	ENSMUSG00000064363, ENSMUSG00000064367
47	Upregulated	0.061	2	241	15.5223	Intracellular receptor signaling pathway	http://amigo.geneontology.org/amigo/term/GO:0030522	ENSMUSG00000001829, ENSMUSG00000030551
48	Upregulated	0.061	2	231	15.3701	Ribose phosphate biosynthetic process	http://amigo.geneontology.org/amigo/term/GO:0046390	ENSMUSG00000064363, ENSMUSG00000064367
49	Upregulated	0.061	1	16	156.775	Epithelial cell fate commitment	http://amigo.geneontology.org/amigo/term/GO:0072148	ENSMUSG00000030551
50	Upregulated	0.061	2	241	15.2951	Purine-containing compound biosynthetic process	http://amigo.geneontology.org/amigo/term/GO:0072522	ENSMUSG00000064363, ENSMUSG00000064367
51	Downregulated	0.000863	11	2145	4.61442	Movement of cell or subcellular component	http://amigo.geneontology.org/amigo/term/GO:0006928	ENSMUSG00000032531, ENSMUSG00000061353, ENSMUSG00000040026, ENSMUSG00000022836, ENSMUSG00000024190, ENSMUSG00000026620, ENSMUSG00000032714, ENSMUSG00000038848, ENSMUSG00000061315, ENSMUSG00000026822, ENSMUSG00000026981
52	Downregulated	0.000863	10	1533	5.71598	Cell migration	http://amigo.geneontology.org/amigo/term/GO:0016477	ENSMUSG00000032531, ENSMUSG00000061353, ENSMUSG00000040026, ENSMUSG00000022836, ENSMUSG00000024190, ENSMUSG00000026620, ENSMUSG00000032714, ENSMUSG00000061315, ENSMUSG00000026822, ENSMUSG00000026981
53	Downregulated	0.000863	11	1913	5.26774	Locomotion	http://amigo.geneontology.org/amigo/term/GO:0040011	ENSMUSG00000032531, ENSMUSG00000061353, ENSMUSG00000040026, ENSMUSG00000022836, ENSMUSG00000024190, ENSMUSG00000026620, ENSMUSG00000032714, ENSMUSG00000038848, ENSMUSG00000061315, ENSMUSG00000026822, ENSMUSG00000026981
54	Downregulated	0.000863	10	1724	5.23499	Cell motility	http://amigo.geneontology.org/amigo/term/GO:0048870	ENSMUSG00000032531, ENSMUSG00000061353, ENSMUSG00000040026, ENSMUSG00000022836, ENSMUSG00000024190, ENSMUSG00000026620, ENSMUSG00000032714, ENSMUSG00000061315, ENSMUSG00000026822, ENSMUSG00000026981
55	Downregulated	0.000863	10	1724	5.23499	Localization of cell	http://amigo.geneontology.org/amigo/term/GO:0051674	ENSMUSG00000032531, ENSMUSG00000061353, ENSMUSG00000040026, ENSMUSG00000022836, ENSMUSG00000024190, ENSMUSG00000026620, ENSMUSG00000032714, ENSMUSG00000061315, ENSMUSG00000026822, ENSMUSG00000026981
56	Downregulated	0.00243	8	1062	6.44419	Regulation of locomotion	http://amigo.geneontology.org/amigo/term/GO:0040012	ENSMUSG00000032531, ENSMUSG00000061353, ENSMUSG00000022836, ENSMUSG00000024190, ENSMUSG00000032714, ENSMUSG00000038848, ENSMUSG00000026822, ENSMUSG00000026981
57	Downregulated	0.00255	8	1090	6.27022	Regulation of cellular component movement	http://amigo.geneontology.org/amigo/term/GO:0051270	ENSMUSG00000032531, ENSMUSG00000061353, ENSMUSG00000022836, ENSMUSG00000024190, ENSMUSG00000032714, ENSMUSG00000038848, ENSMUSG00000026822, ENSMUSG00000026981
58	Downregulated	0.00679	14	4944	2.57046	Multicellular organism development	http://amigo.geneontology.org/amigo/term/GO:0007275	ENSMUSG00000022330, ENSMUSG00000024190, ENSMUSG00000032531, ENSMUSG00000061353, ENSMUSG00000022206, ENSMUSG00000022836, ENSMUSG00000026620, ENSMUSG00000026981, ENSMUSG00000032714, ENSMUSG00000038530, ENSMUSG00000050578, ENSMUSG00000038848, ENSMUSG00000061315, ENSMUSG00000026822
59	Downregulated	0.00706	11	2914	3.43856	Regulation of localization	http://amigo.geneontology.org/amigo/term/GO:0032879	ENSMUSG00000032531, ENSMUSG00000061353, ENSMUSG00000022836, ENSMUSG00000024190, ENSMUSG00000032714, ENSMUSG00000038530, ENSMUSG00000038848, ENSMUSG00000026822, ENSMUSG00000026981, ENSMUSG00000050578, ENSMUSG00000061315
60	Downregulated	0.00889	7	956	6.10444	Regulation of cell migration	http://amigo.geneontology.org/amigo/term/GO:0030334	ENSMUSG00000032531, ENSMUSG00000061353, ENSMUSG00000022836, ENSMUSG00000024190, ENSMUSG00000032714, ENSMUSG00000026822, ENSMUSG00000026981
61	Downregulated	0.00961	9	2018	4.10944	Tissue development	http://amigo.geneontology.org/amigo/term/GO:0009888	ENSMUSG00000024190, ENSMUSG00000022836, ENSMUSG00000026620, ENSMUSG00000038530, ENSMUSG00000022330, ENSMUSG00000050578, ENSMUSG00000061315, ENSMUSG00000061353, ENSMUSG00000026822
62	Downregulated	0.00961	2	15	126.687	Pancreatic juice secretion	http://amigo.geneontology.org/amigo/term/GO:0030157	ENSMUSG00000022206, ENSMUSG00000050578
63	Downregulated	0.00961	3	112	31.6717	Regulation of amine transport	http://amigo.geneontology.org/amigo/term/GO:0051952	ENSMUSG00000038530, ENSMUSG00000061353, ENSMUSG00000026981
64	Downregulated	0.00961	7	1014	5.84125	Regulation of cell motility	http://amigo.geneontology.org/amigo/term/GO:2000145	ENSMUSG00000032531, ENSMUSG00000061353, ENSMUSG00000022836, ENSMUSG00000024190, ENSMUSG00000032714, ENSMUSG00000026822, ENSMUSG00000026981
65	Downregulated	0.0098	3	120	30.7402	Amine transport	http://amigo.geneontology.org/amigo/term/GO:0015837	ENSMUSG00000038530, ENSMUSG00000061353, ENSMUSG00000026981
66	Downregulated	0.00997	2	20	116.13	Negative regulation of amino acid transport	http://amigo.geneontology.org/amigo/term/GO:0051956	ENSMUSG00000038530, ENSMUSG00000026981
67	Downregulated	0.0138	8	3211	4.38915	System process	http://amigo.geneontology.org/amigo/term/GO:0003008	ENSMUSG00000022206, ENSMUSG00000022836, ENSMUSG00000038530, ENSMUSG00000061353, ENSMUSG00000038848, ENSMUSG00000026822, ENSMUSG00000026981, ENSMUSG00000050578
68	Downregulated	0.0194	10	2751	3.19476	Anatomical structure morphogenesis	http://amigo.geneontology.org/amigo/term/GO:0009653	ENSMUSG00000024190, ENSMUSG00000032531, ENSMUSG00000061353, ENSMUSG00000022836, ENSMUSG00000026981, ENSMUSG00000050578, ENSMUSG00000022330, ENSMUSG00000038848, ENSMUSG00000061315, ENSMUSG00000026822
69	Downregulated	0.0216	2	29	73.345	Negative regulation of organic acid transport	http://amigo.geneontology.org/amigo/term/GO:0032891	ENSMUSG00000038530, ENSMUSG00000026981
70	Downregulated	0.0252	2	37	66.3598	Negative regulation of amine transport	http://amigo.geneontology.org/amigo/term/GO:0051953	ENSMUSG00000038530, ENSMUSG00000026981
71	Downregulated	0.0275	5	736	7.1685	Regulation of ion transport	http://amigo.geneontology.org/amigo/term/GO:0043269	ENSMUSG00000061353, ENSMUSG00000022836, ENSMUSG00000038530, ENSMUSG00000026822, ENSMUSG00000026981
72	Downregulated	0.0275	2	32	60.5894	Negative regulation of anion transport	http://amigo.geneontology.org/amigo/term/GO:1903792	ENSMUSG00000038530, ENSMUSG00000026981
73	Downregulated	0.0312	2	29	55.7422	Regulation of monocyte chemotaxis	http://amigo.geneontology.org/amigo/term/GO:0090025	ENSMUSG00000024190, ENSMUSG00000061353
74	Downregulated	0.0322	2	47	53.5983	Acute-phase response	http://amigo.geneontology.org/amigo/term/GO:0006953	ENSMUSG00000040026, ENSMUSG00000026981
75	Downregulated	0.0322	3	162	17.2755	Memory	http://amigo.geneontology.org/amigo/term/GO:0007613	ENSMUSG00000038848, ENSMUSG00000026822, ENSMUSG00000026981
76	Downregulated	0.0372	2	34	48.0536	Osteoblast proliferation	http://amigo.geneontology.org/amigo/term/GO:0033687	ENSMUSG00000022206, ENSMUSG00000022330
77	Downregulated	0.0396	3	180	15.484	Temperature homeostasis	http://amigo.geneontology.org/amigo/term/GO:0001659	ENSMUSG00000022206, ENSMUSG00000026822, ENSMUSG00000026981
78	Downregulated	0.0396	4	434	8.96177	Regulation of metal ion transport	http://amigo.geneontology.org/amigo/term/GO:0010959	ENSMUSG00000061353, ENSMUSG00000022836, ENSMUSG00000038530, ENSMUSG00000026822
79	Downregulated	0.0455	2	49	39.8159	Negative regulation of leukocyte migration	http://amigo.geneontology.org/amigo/term/GO:0002686	ENSMUSG00000024190, ENSMUSG00000061353
80	Downregulated	0.0455	2	50	39.8159	Secretion by tissue	http://amigo.geneontology.org/amigo/term/GO:0032941	ENSMUSG00000022206, ENSMUSG00000050578
81	Downregulated	0.0455	2	53	40.9869	Regulation of amino acid transport	http://amigo.geneontology.org/amigo/term/GO:0051955	ENSMUSG00000038530, ENSMUSG00000026981
82	Downregulated	0.0492	2	61	37.6637	Monocyte chemotaxis	http://amigo.geneontology.org/amigo/term/GO:0002548	ENSMUSG00000024190, ENSMUSG00000061353
83	Downregulated	0.0514	1	2	696.778	Positive regulation of iron ion transport	http://amigo.geneontology.org/amigo/term/GO:0034758	ENSMUSG00000026822
84	Downregulated	0.0514	1	2	696.778	Positive regulation of iron ion transmembrane transport	http://amigo.geneontology.org/amigo/term/GO:0034761	ENSMUSG00000026822
85	Downregulated	0.0514	1	2	696.778	Positive regulation of iron ion import across plasma membrane	http://amigo.geneontology.org/amigo/term/GO:1904440	ENSMUSG00000026822
86	Downregulated	0.0521	3	196	12.9033	Gastrulation	http://amigo.geneontology.org/amigo/term/GO:0007369	ENSMUSG00000024190, ENSMUSG00000026981, ENSMUSG00000022330
87	Downregulated	0.0549	6	1160	4.36851	Circulatory system development	http://amigo.geneontology.org/amigo/term/GO:0072359	ENSMUSG00000032531, ENSMUSG00000022836, ENSMUSG00000038530, ENSMUSG00000061315, ENSMUSG00000061353, ENSMUSG00000050578
88	Downregulated	0.0563	4	443	7.45217	Ameboidal-type cell migration	http://amigo.geneontology.org/amigo/term/GO:0001667	ENSMUSG00000032531, ENSMUSG00000032714, ENSMUSG00000061353, ENSMUSG00000026822
89	Downregulated	0.0584	5	851	5.34339	Cellular response to cytokine stimulus	http://amigo.geneontology.org/amigo/term/GO:0071345	ENSMUSG00000026981, ENSMUSG00000061353, ENSMUSG00000040026, ENSMUSG00000024190, ENSMUSG00000070934
90	Downregulated	0.0595	3	231	11.8769	Regulation of chemotaxis	http://amigo.geneontology.org/amigo/term/GO:0050920	ENSMUSG00000061353, ENSMUSG00000024190, ENSMUSG00000038848
91	Downregulated	0.0676	4	610	6.48165	Chemotaxis	http://amigo.geneontology.org/amigo/term/GO:0006935	ENSMUSG00000061353, ENSMUSG00000040026, ENSMUSG00000024190, ENSMUSG00000038848
92	Downregulated	0.0676	4	615	6.40715	Taxis	http://amigo.geneontology.org/amigo/term/GO:0042330	ENSMUSG00000061353, ENSMUSG00000040026, ENSMUSG00000024190, ENSMUSG00000038848
93	Downregulated	0.0676	1	2	348.389	Negative regulation of cytolysis	http://amigo.geneontology.org/amigo/term/GO:0045918	ENSMUSG00000070934
94	Downregulated	0.0676	2	67	27.8711	Positive chemotaxis	http://amigo.geneontology.org/amigo/term/GO:0050918	ENSMUSG00000061353, ENSMUSG00000040026
95	Downregulated	0.0676	3	286	10.1967	Regulation of calcium ion transport	http://amigo.geneontology.org/amigo/term/GO:0051924	ENSMUSG00000061353, ENSMUSG00000022836, ENSMUSG00000038530
96	Downregulated	0.0676	1	4	348.389	Negative regulation of dopamine receptor signaling pathway	http://amigo.geneontology.org/amigo/term/GO:0060160	ENSMUSG00000038530
97	Downregulated	0.0676	1	11	348.389	Sequestering of iron ion	http://amigo.geneontology.org/amigo/term/GO:0097577	ENSMUSG00000026822
98	Downregulated	0.0676	1	2	348.389	Negative regulation of glycine import across plasma membrane	http://amigo.geneontology.org/amigo/term/GO:1900924	ENSMUSG00000038530
99	Downregulated	0.0676	1	8	348.389	Negative regulation of leukocyte tethering or rolling	http://amigo.geneontology.org/amigo/term/GO:1903237	ENSMUSG00000061353
100	Downregulated	0.0676	1	3	348.389	Regulation of iron ion import across plasma membrane	http://amigo.geneontology.org/amigo/term/GO:1904438	ENSMUSG00000026822

## Sheet: 0.325uM_KEEG 24h
	group	FDR	nGenes	Pathway size	Fold enriched	Pathway	URL	Genes
1	Upregulated	0.0422	1	31	104.509	Ascorbate and aldarate metabolism	http://www.genome.jp/kegg-bin/show_pathway?mmu00053	ENSMUSG00000029455
2	Upregulated	0.0422	2	133	19.8207	Oxidative phosphorylation	http://www.genome.jp/kegg-bin/show_pathway?mmu00190	ENSMUSG00000064363, ENSMUSG00000064367
3	Upregulated	0.0422	1	26	67.6235	Histidine metabolism	http://www.genome.jp/kegg-bin/show_pathway?mmu00340	ENSMUSG00000029455
4	Upregulated	0.0422	1	21	67.6235	Pantothenate and CoA biosynthesis	http://www.genome.jp/kegg-bin/show_pathway?mmu00770	ENSMUSG00000029455
5	Upregulated	0.0422	2	228	11.1612	Thermogenesis	http://www.genome.jp/kegg-bin/show_pathway?mmu04714	ENSMUSG00000064363, ENSMUSG00000064367
6	Upregulated	0.0422	2	146	20.9018	Retrograde endocannabinoid signaling	http://www.genome.jp/kegg-bin/show_pathway?mmu04723	ENSMUSG00000064363, ENSMUSG00000064367
7	Upregulated	0.0422	2	262	9.86781	Parkinson disease	http://www.genome.jp/kegg-bin/show_pathway?mmu05012	ENSMUSG00000064363, ENSMUSG00000064367
8	Upregulated	0.0422	2	266	9.95325	Prion disease	http://www.genome.jp/kegg-bin/show_pathway?mmu05020	ENSMUSG00000064363, ENSMUSG00000064367
9	Upregulated	0.0422	2	220	11.6711	Chemical carcinogenesis-reactive oxygen species	http://www.genome.jp/kegg-bin/show_pathway?mmu05208	ENSMUSG00000064363, ENSMUSG00000064367
10	Upregulated	0.0422	2	204	12.9898	Diabetic cardiomyopathy	http://www.genome.jp/kegg-bin/show_pathway?mmu05415	ENSMUSG00000064363, ENSMUSG00000064367
11	Upregulated	0.0503	1	32	45.984	Beta-Alanine metabolism	http://www.genome.jp/kegg-bin/show_pathway?mmu00410	ENSMUSG00000029455
12	Upregulated	0.0503	2	300	8.54721	Huntington disease	http://www.genome.jp/kegg-bin/show_pathway?mmu05016	ENSMUSG00000064363, ENSMUSG00000064367
13	Upregulated	0.051	1	52	31.9333	Fatty acid degradation	http://www.genome.jp/kegg-bin/show_pathway?mmu00071	ENSMUSG00000029455
14	Upregulated	0.051	1	51	38.32	Tryptophan metabolism	http://www.genome.jp/kegg-bin/show_pathway?mmu00380	ENSMUSG00000029455
15	Upregulated	0.051	1	44	32.8457	Pyruvate metabolism	http://www.genome.jp/kegg-bin/show_pathway?mmu00620	ENSMUSG00000029455
16	Upregulated	0.051	2	380	6.84286	Alzheimer disease	http://www.genome.jp/kegg-bin/show_pathway?mmu05010	ENSMUSG00000064363, ENSMUSG00000064367
17	Upregulated	0.051	2	365	7.16262	Amyotrophic lateral sclerosis	http://www.genome.jp/kegg-bin/show_pathway?mmu05014	ENSMUSG00000064363, ENSMUSG00000064367
18	Upregulated	0.054	1	56	26.1273	Valine leucine and isoleucine degradation	http://www.genome.jp/kegg-bin/show_pathway?mmu00280	ENSMUSG00000029455
19	Upregulated	0.054	1	54	28.039	Arginine and proline metabolism	http://www.genome.jp/kegg-bin/show_pathway?mmu00330	ENSMUSG00000029455
20	Upregulated	0.054	1	63	25.5467	Glycerolipid metabolism	http://www.genome.jp/kegg-bin/show_pathway?mmu00561	ENSMUSG00000029455
21	Upregulated	0.0548	1	66	23.4612	Glycolysis/Gluconeogenesis	http://www.genome.jp/kegg-bin/show_pathway?mmu00010	ENSMUSG00000029455
22	Upregulated	0.0548	1	62	21.2889	Lysine degradation	http://www.genome.jp/kegg-bin/show_pathway?mmu00310	ENSMUSG00000029455
23	Upregulated	0.0548	1	62	20.9018	Longevity regulating pathway-multiple species	http://www.genome.jp/kegg-bin/show_pathway?mmu04213	ENSMUSG00000001829
24	Upregulated	0.0548	2	469	5.63529	Pathways of neurodegeneration-multiple diseases	http://www.genome.jp/kegg-bin/show_pathway?mmu05022	ENSMUSG00000064363, ENSMUSG00000064367
25	Upregulated	0.0769	3	1611	2.81076	Metabolic pathways	http://www.genome.jp/kegg-bin/show_pathway?mmu01100	ENSMUSG00000029455, ENSMUSG00000064363, ENSMUSG00000064367
26	Upregulated	0.0983	1	139	10.5468	Alcoholic liver disease	http://www.genome.jp/kegg-bin/show_pathway?mmu04936	ENSMUSG00000029455

## Sheet: 0.75uM_BP 24h
	group	FDR	nGenes	Pathway size	Fold enriched	Pathway	URL	Genes
1	Downregulated	0.00469	8	380	8.9426	Regulation of body fluid levels	http://amigo.geneontology.org/amigo/term/GO:0050878	ENSMUSG00000030790, ENSMUSG00000033022, ENSMUSG00000027367, ENSMUSG00000031812, ENSMUSG00000058239, ENSMUSG00000063415, ENSMUSG00000024164, ENSMUSG00000050578

## Sheet: 0.75uM_KEEG 24h
	group	FDR	nGenes	Pathway size	Fold enriched	Pathway	URL	Genes
1	Upregulated	0.0319	2	82	31.0703	RNA degradation	http://www.genome.jp/kegg-bin/show_pathway?mmu03018	ENSMUSG00000022283, ENSMUSG00000048546

## Sheet: 1.5uM_BP 24h
	group	FDR	nGenes	Pathway size	Fold enriched	Pathway	URL	Genes
1	Upregulated	0.0632	1	10	836.133	Adenylate cyclase-activating dopamine receptor signaling pathway	http://amigo.geneontology.org/amigo/term/GO:0007191	ENSMUSG00000027523
2	Upregulated	0.0632	1	17	348.389	Post-embryonic animal morphogenesis	http://amigo.geneontology.org/amigo/term/GO:0009886	ENSMUSG00000027523
3	Upregulated	0.0632	1	13	418.067	Negative regulation of T cell differentiation in thymus	http://amigo.geneontology.org/amigo/term/GO:0033085	ENSMUSG00000052713
4	Upregulated	0.0632	1	9	597.238	Negative regulation of renal sodium excretion	http://amigo.geneontology.org/amigo/term/GO:0035814	ENSMUSG00000027523
5	Upregulated	0.0632	1	6	836.133	Parathyroid hormone secretion	http://amigo.geneontology.org/amigo/term/GO:0035898	ENSMUSG00000027523
6	Upregulated	0.0632	1	14	321.59	Negative regulation of multicellular organism growth	http://amigo.geneontology.org/amigo/term/GO:0040015	ENSMUSG00000027523
7	Upregulated	0.0632	1	29	380.061	Positive regulation of cAMP-mediated signaling	http://amigo.geneontology.org/amigo/term/GO:0043950	ENSMUSG00000027523
8	Upregulated	0.0632	1	13	380.061	Ectodermal placode formation	http://amigo.geneontology.org/amigo/term/GO:0060788	ENSMUSG00000027523
9	Upregulated	0.0632	1	5	1045.17	Hair follicle placode formation	http://amigo.geneontology.org/amigo/term/GO:0060789	ENSMUSG00000027523
10	Upregulated	0.0632	1	13	464.519	Response to parathyroid hormone	http://amigo.geneontology.org/amigo/term/GO:0071107	ENSMUSG00000027523
11	Upregulated	0.0632	1	18	321.59	Cellular response to prostaglandin stimulus	http://amigo.geneontology.org/amigo/term/GO:0071379	ENSMUSG00000027523
12	Upregulated	0.0632	1	15	348.389	Cellular response to prostaglandin E stimulus	http://amigo.geneontology.org/amigo/term/GO:0071380	ENSMUSG00000027523
13	Upregulated	0.0632	1	15	321.59	Genomic imprinting	http://amigo.geneontology.org/amigo/term/GO:0071514	ENSMUSG00000027523
14	Upregulated	0.0632	1	14	348.389	Ectodermal placode development	http://amigo.geneontology.org/amigo/term/GO:0071696	ENSMUSG00000027523
15	Upregulated	0.0632	1	13	380.061	Ectodermal placode morphogenesis	http://amigo.geneontology.org/amigo/term/GO:0071697	ENSMUSG00000027523
16	Upregulated	0.0632	2	323	35.2799	Regulation of leukocyte differentiation	http://amigo.geneontology.org/amigo/term/GO:1902105	ENSMUSG00000027523, ENSMUSG00000052713
17	Upregulated	0.0632	2	419	26.6285	Regulation of hemopoiesis	http://amigo.geneontology.org/amigo/term/GO:1903706	ENSMUSG00000027523, ENSMUSG00000052713
18	Upregulated	0.0632	1	4	1393.56	Regulation of parathyroid hormone secretion	http://amigo.geneontology.org/amigo/term/GO:2000828	ENSMUSG00000027523
19	Upregulated	0.0644	1	24	298.619	Adenylate cyclase-activating adrenergic receptor signaling pathway	http://amigo.geneontology.org/amigo/term/GO:0071880	ENSMUSG00000027523
20	Upregulated	0.0646	2	616	18.8743	Leukocyte differentiation	http://amigo.geneontology.org/amigo/term/GO:0002521	ENSMUSG00000027523, ENSMUSG00000052713
21	Upregulated	0.0646	1	28	245.922	Response to prostaglandin E	http://amigo.geneontology.org/amigo/term/GO:0034695	ENSMUSG00000027523
22	Upregulated	0.0646	1	28	245.922	Renal sodium excretion	http://amigo.geneontology.org/amigo/term/GO:0035812	ENSMUSG00000027523
23	Upregulated	0.0646	1	26	261.292	Regulation of renal sodium excretion	http://amigo.geneontology.org/amigo/term/GO:0035813	ENSMUSG00000027523
24	Upregulated	0.067	1	30	181.768	Regulation of T cell differentiation in thymus	http://amigo.geneontology.org/amigo/term/GO:0033081	ENSMUSG00000052713
25	Upregulated	0.067	1	34	199.079	Response to prostaglandin	http://amigo.geneontology.org/amigo/term/GO:0034694	ENSMUSG00000027523
26	Upregulated	0.067	1	46	190.03	Regulation of cAMP-mediated signaling	http://amigo.geneontology.org/amigo/term/GO:0043949	ENSMUSG00000027523
27	Upregulated	0.067	1	30	209.033	Regulation of excretion	http://amigo.geneontology.org/amigo/term/GO:0044062	ENSMUSG00000027523
28	Upregulated	0.067	1	34	209.033	Positive regulation of osteoclast differentiation	http://amigo.geneontology.org/amigo/term/GO:0045672	ENSMUSG00000027523
29	Upregulated	0.067	1	32	209.033	Adrenergic receptor signaling pathway	http://amigo.geneontology.org/amigo/term/GO:0071875	ENSMUSG00000027523
30	Upregulated	0.067	1	39	181.768	Renal tubular secretion	http://amigo.geneontology.org/amigo/term/GO:0097254	ENSMUSG00000027523
31	Upregulated	0.0677	1	33	174.194	Embryonic hindlimb morphogenesis	http://amigo.geneontology.org/amigo/term/GO:0035116	ENSMUSG00000027523
32	Upregulated	0.0683	1	37	167.227	Dopamine receptor signaling pathway	http://amigo.geneontology.org/amigo/term/GO:0007212	ENSMUSG00000027523
33	Upregulated	0.0711	1	31	144.161	Endochondral ossification	http://amigo.geneontology.org/amigo/term/GO:0001958	ENSMUSG00000027523
34	Upregulated	0.0711	1	50	139.356	Excretion	http://amigo.geneontology.org/amigo/term/GO:0007588	ENSMUSG00000027523
35	Upregulated	0.0711	1	39	119.448	Positive regulation of sodium ion transport	http://amigo.geneontology.org/amigo/term/GO:0010765	ENSMUSG00000027523
36	Upregulated	0.0711	1	66	119.448	Regulation of cyclase activity	http://amigo.geneontology.org/amigo/term/GO:0031279	ENSMUSG00000027523
37	Upregulated	0.0711	1	41	134.86	Hindlimb morphogenesis	http://amigo.geneontology.org/amigo/term/GO:0035137	ENSMUSG00000027523
38	Upregulated	0.0711	1	31	144.161	Replacement ossification	http://amigo.geneontology.org/amigo/term/GO:0036075	ENSMUSG00000027523
39	Upregulated	0.0711	1	55	122.961	Regulation of endocrine process	http://amigo.geneontology.org/amigo/term/GO:0044060	ENSMUSG00000027523
40	Upregulated	0.0711	1	65	119.448	Negative regulation of blood pressure	http://amigo.geneontology.org/amigo/term/GO:0045776	ENSMUSG00000027523
41	Upregulated	0.0711	1	57	119.448	Sodium ion homeostasis	http://amigo.geneontology.org/amigo/term/GO:0055078	ENSMUSG00000027523
42	Upregulated	0.0711	2	909	13.0239	Cell-cell adhesion	http://amigo.geneontology.org/amigo/term/GO:0098609	ENSMUSG00000027523, ENSMUSG00000052713
43	Upregulated	0.0711	1	41	149.31	Regulation of renal system process	http://amigo.geneontology.org/amigo/term/GO:0098801	ENSMUSG00000027523
44	Upregulated	0.0719	2	1070	10.873	Cell activation	http://amigo.geneontology.org/amigo/term/GO:0001775	ENSMUSG00000027523, ENSMUSG00000052713
45	Upregulated	0.0719	1	68	88.9504	Positive regulation of myeloid leukocyte differentiation	http://amigo.geneontology.org/amigo/term/GO:0002763	ENSMUSG00000027523
46	Upregulated	0.0719	1	67	110.018	CAMP-mediated signaling	http://amigo.geneontology.org/amigo/term/GO:0019933	ENSMUSG00000027523
47	Upregulated	0.0719	2	969	11.5488	Hemopoiesis	http://amigo.geneontology.org/amigo/term/GO:0030097	ENSMUSG00000027523, ENSMUSG00000052713
48	Upregulated	0.0719	1	50	110.018	Negative regulation of T cell differentiation	http://amigo.geneontology.org/amigo/term/GO:0045581	ENSMUSG00000052713
49	Upregulated	0.0719	1	58	97.2248	Negative regulation of lymphocyte differentiation	http://amigo.geneontology.org/amigo/term/GO:0045620	ENSMUSG00000052713
50	Upregulated	0.0719	2	1013	11.0746	Hematopoietic or lymphoid organ development	http://amigo.geneontology.org/amigo/term/GO:0048534	ENSMUSG00000027523, ENSMUSG00000052713
51	Downregulated	0.0616	3	120	27.6662	Amine transport	http://amigo.geneontology.org/amigo/term/GO:0015837	ENSMUSG00000038530, ENSMUSG00000061353, ENSMUSG00000026981
52	Downregulated	0.0616	3	112	28.5045	Regulation of amine transport	http://amigo.geneontology.org/amigo/term/GO:0051952	ENSMUSG00000038530, ENSMUSG00000061353, ENSMUSG00000026981
53	Downregulated	0.0616	2	20	104.517	Negative regulation of amino acid transport	http://amigo.geneontology.org/amigo/term/GO:0051956	ENSMUSG00000038530, ENSMUSG00000026981
54	Downregulated	0.0623	9	2145	3.39789	Movement of cell or subcellular component	http://amigo.geneontology.org/amigo/term/GO:0006928	ENSMUSG00000032531, ENSMUSG00000032536, ENSMUSG00000061353, ENSMUSG00000040026, ENSMUSG00000022836, ENSMUSG00000024190, ENSMUSG00000026620, ENSMUSG00000054836, ENSMUSG00000026981
55	Downregulated	0.0623	2	47	48.2385	Acute-phase response	http://amigo.geneontology.org/amigo/term/GO:0006953	ENSMUSG00000040026, ENSMUSG00000026981
56	Downregulated	0.0623	8	1533	4.1155	Cell migration	http://amigo.geneontology.org/amigo/term/GO:0016477	ENSMUSG00000032531, ENSMUSG00000061353, ENSMUSG00000040026, ENSMUSG00000022836, ENSMUSG00000024190, ENSMUSG00000026620, ENSMUSG00000054836, ENSMUSG00000026981
57	Downregulated	0.0623	2	29	66.0105	Negative regulation of organic acid transport	http://amigo.geneontology.org/amigo/term/GO:0032891	ENSMUSG00000038530, ENSMUSG00000026981
58	Downregulated	0.0623	8	1724	3.7692	Cell motility	http://amigo.geneontology.org/amigo/term/GO:0048870	ENSMUSG00000032531, ENSMUSG00000061353, ENSMUSG00000040026, ENSMUSG00000022836, ENSMUSG00000024190, ENSMUSG00000026620, ENSMUSG00000054836, ENSMUSG00000026981
59	Downregulated	0.0623	2	27	48.2385	Establishment of mitochondrion localization	http://amigo.geneontology.org/amigo/term/GO:0051654	ENSMUSG00000032536, ENSMUSG00000026620
60	Downregulated	0.0623	8	1724	3.7692	Localization of cell	http://amigo.geneontology.org/amigo/term/GO:0051674	ENSMUSG00000032531, ENSMUSG00000061353, ENSMUSG00000040026, ENSMUSG00000022836, ENSMUSG00000024190, ENSMUSG00000026620, ENSMUSG00000054836, ENSMUSG00000026981
61	Downregulated	0.0623	2	37	59.7238	Negative regulation of amine transport	http://amigo.geneontology.org/amigo/term/GO:0051953	ENSMUSG00000038530, ENSMUSG00000026981
62	Downregulated	0.0623	2	29	50.168	Regulation of monocyte chemotaxis	http://amigo.geneontology.org/amigo/term/GO:0090025	ENSMUSG00000024190, ENSMUSG00000061353
63	Downregulated	0.0623	2	32	54.5304	Negative regulation of anion transport	http://amigo.geneontology.org/amigo/term/GO:1903792	ENSMUSG00000038530, ENSMUSG00000026981
64	Downregulated	0.0623	5	531	7.34309	Cell surface receptor signaling pathway involved in cell-cell signaling	http://amigo.geneontology.org/amigo/term/GO:1905114	ENSMUSG00000021567, ENSMUSG00000036904, ENSMUSG00000026620, ENSMUSG00000032531, ENSMUSG00000038530
65	Downregulated	0.083	7	1534	3.89849	Cell-cell signaling	http://amigo.geneontology.org/amigo/term/GO:0007267	ENSMUSG00000021567, ENSMUSG00000036904, ENSMUSG00000026620, ENSMUSG00000032531, ENSMUSG00000038530, ENSMUSG00000061353, ENSMUSG00000026981
66	Downregulated	0.083	6	956	4.70914	Regulation of cell migration	http://amigo.geneontology.org/amigo/term/GO:0030334	ENSMUSG00000032531, ENSMUSG00000061353, ENSMUSG00000022836, ENSMUSG00000024190, ENSMUSG00000054836, ENSMUSG00000026981
67	Downregulated	0.083	8	1913	3.44797	Locomotion	http://amigo.geneontology.org/amigo/term/GO:0040011	ENSMUSG00000032531, ENSMUSG00000061353, ENSMUSG00000040026, ENSMUSG00000022836, ENSMUSG00000024190, ENSMUSG00000026620, ENSMUSG00000054836, ENSMUSG00000026981
68	Downregulated	0.083	2	53	36.8882	Regulation of amino acid transport	http://amigo.geneontology.org/amigo/term/GO:0051955	ENSMUSG00000038530, ENSMUSG00000026981
69	Downregulated	0.0833	2	49	35.8343	Negative regulation of leukocyte migration	http://amigo.geneontology.org/amigo/term/GO:0002686	ENSMUSG00000024190, ENSMUSG00000061353
70	Downregulated	0.0839	6	1014	4.50611	Regulation of cell motility	http://amigo.geneontology.org/amigo/term/GO:2000145	ENSMUSG00000032531, ENSMUSG00000061353, ENSMUSG00000022836, ENSMUSG00000024190, ENSMUSG00000054836, ENSMUSG00000026981
71	Downregulated	0.0842	2	61	33.8973	Monocyte chemotaxis	http://amigo.geneontology.org/amigo/term/GO:0002548	ENSMUSG00000024190, ENSMUSG00000061353
72	Downregulated	0.0897	3	196	11.613	Gastrulation	http://amigo.geneontology.org/amigo/term/GO:0007369	ENSMUSG00000024190, ENSMUSG00000026981, ENSMUSG00000022330
73	Downregulated	0.0897	4	414	7.16686	Wnt signaling pathway	http://amigo.geneontology.org/amigo/term/GO:0016055	ENSMUSG00000021567, ENSMUSG00000036904, ENSMUSG00000026620, ENSMUSG00000032531
74	Downregulated	0.0897	6	1062	4.34983	Regulation of locomotion	http://amigo.geneontology.org/amigo/term/GO:0040012	ENSMUSG00000032531, ENSMUSG00000061353, ENSMUSG00000022836, ENSMUSG00000024190, ENSMUSG00000054836, ENSMUSG00000026981
75	Downregulated	0.0897	6	1090	4.2324	Regulation of cellular component movement	http://amigo.geneontology.org/amigo/term/GO:0051270	ENSMUSG00000032531, ENSMUSG00000061353, ENSMUSG00000022836, ENSMUSG00000024190, ENSMUSG00000054836, ENSMUSG00000026981
76	Downregulated	0.0897	4	416	7.14644	Cell-cell signaling by wnt	http://amigo.geneontology.org/amigo/term/GO:0198738	ENSMUSG00000021567, ENSMUSG00000036904, ENSMUSG00000026620, ENSMUSG00000032531
77	Downregulated	0.0925	3	190	11.3331	Regulation of MAP kinase activity	http://amigo.geneontology.org/amigo/term/GO:0043405	ENSMUSG00000036904, ENSMUSG00000024190, ENSMUSG00000026981
78	Downregulated	0.0931	2	51	27.8711	Mitochondrion localization	http://amigo.geneontology.org/amigo/term/GO:0051646	ENSMUSG00000032536, ENSMUSG00000026620
79	Downregulated	0.0939	2	53	27.2652	Positive regulation of JUN kinase activity	http://amigo.geneontology.org/amigo/term/GO:0043507	ENSMUSG00000036904, ENSMUSG00000026981

## Sheet: 1.5uM_KEEG 24h
	group	FDR	nGenes	Pathway size	Fold enriched	Pathway	URL	Genes
1	Upregulated	0.00378	2	74	114.96	Thyroid hormone synthesis	http://www.genome.jp/kegg-bin/show_pathway?mmu04918	ENSMUSG00000025823, ENSMUSG00000027523
2	Upregulated	0.0511	1	93	33.0345	Endocrine resistance	http://www.genome.jp/kegg-bin/show_pathway?mmu01522	ENSMUSG00000027523
3	Upregulated	0.0511	1	86	41.0571	Gap junction	http://www.genome.jp/kegg-bin/show_pathway?mmu04540	ENSMUSG00000027523
4	Upregulated	0.0511	1	98	39.3699	Circadian entrainment	http://www.genome.jp/kegg-bin/show_pathway?mmu04713	ENSMUSG00000027523
5	Upregulated	0.0511	1	113	34.6265	Glutamatergic synapse	http://www.genome.jp/kegg-bin/show_pathway?mmu04724	ENSMUSG00000027523
6	Upregulated	0.0511	1	131	36.8462	Serotonergic synapse	http://www.genome.jp/kegg-bin/show_pathway?mmu04726	ENSMUSG00000027523
7	Upregulated	0.0511	1	60	59.875	Long-term depression	http://www.genome.jp/kegg-bin/show_pathway?mmu04730	ENSMUSG00000027523
8	Upregulated	0.0511	1	126	35.925	Inflammatory mediator regulation of TRP channels	http://www.genome.jp/kegg-bin/show_pathway?mmu04750	ENSMUSG00000027523
9	Upregulated	0.0511	1	86	46.3548	Insulin secretion	http://www.genome.jp/kegg-bin/show_pathway?mmu04911	ENSMUSG00000027523
10	Upregulated	0.0511	1	90	38.8378	GnRH signaling pathway	http://www.genome.jp/kegg-bin/show_pathway?mmu04912	ENSMUSG00000027523
11	Upregulated	0.0511	1	63	99.1034	Ovarian steroidogenesis	http://www.genome.jp/kegg-bin/show_pathway?mmu04913	ENSMUSG00000027523
12	Upregulated	0.0511	1	100	35.4815	Melanogenesis	http://www.genome.jp/kegg-bin/show_pathway?mmu04916	ENSMUSG00000027523
13	Upregulated	0.0511	1	104	33.0345	Glucagon signaling pathway	http://www.genome.jp/kegg-bin/show_pathway?mmu04922	ENSMUSG00000027523
14	Upregulated	0.0511	1	57	65.3182	Regulation of lipolysis in adipocytes	http://www.genome.jp/kegg-bin/show_pathway?mmu04923	ENSMUSG00000027523
15	Upregulated	0.0511	1	75	55.2692	Renin secretion	http://www.genome.jp/kegg-bin/show_pathway?mmu04924	ENSMUSG00000027523
16	Upregulated	0.0511	1	102	38.32	Aldosterone synthesis and secretion	http://www.genome.jp/kegg-bin/show_pathway?mmu04925	ENSMUSG00000027523
17	Upregulated	0.0511	1	72	57.48	Cortisol synthesis and secretion	http://www.genome.jp/kegg-bin/show_pathway?mmu04927	ENSMUSG00000027523
18	Upregulated	0.0511	1	108	33.4186	Parathyroid hormone synthesis secretion and action	http://www.genome.jp/kegg-bin/show_pathway?mmu04928	ENSMUSG00000027523
19	Upregulated	0.0511	1	61	75.6316	Endocrine and other factor-regulated calcium reabsorption	http://www.genome.jp/kegg-bin/show_pathway?mmu04961	ENSMUSG00000027523
20	Upregulated	0.0511	1	44	77.6757	Vasopressin-regulated water reabsorption	http://www.genome.jp/kegg-bin/show_pathway?mmu04962	ENSMUSG00000027523
21	Upregulated	0.0511	1	84	52.2545	Salivary secretion	http://www.genome.jp/kegg-bin/show_pathway?mmu04970	ENSMUSG00000027523
22	Upregulated	0.0511	1	75	56.3529	Gastric acid secretion	http://www.genome.jp/kegg-bin/show_pathway?mmu04971	ENSMUSG00000027523
23	Upregulated	0.0511	1	113	47.9	Pancreatic secretion	http://www.genome.jp/kegg-bin/show_pathway?mmu04972	ENSMUSG00000027523
24	Upregulated	0.0511	1	100	61.1489	Bile secretion	http://www.genome.jp/kegg-bin/show_pathway?mmu04976	ENSMUSG00000027523
25	Upregulated	0.0511	1	48	82.1143	Cocaine addiction	http://www.genome.jp/kegg-bin/show_pathway?mmu05030	ENSMUSG00000027523
26	Upregulated	0.0511	1	68	56.3529	Amphetamine addiction	http://www.genome.jp/kegg-bin/show_pathway?mmu05031	ENSMUSG00000027523
27	Upregulated	0.0511	1	91	47.1148	Morphine addiction	http://www.genome.jp/kegg-bin/show_pathway?mmu05032	ENSMUSG00000027523
28	Upregulated	0.0511	1	103	35.4815	Chagas disease	http://www.genome.jp/kegg-bin/show_pathway?mmu05142	ENSMUSG00000027523
29	Upregulated	0.0511	1	107	36.3797	Amoebiasis	http://www.genome.jp/kegg-bin/show_pathway?mmu05146	ENSMUSG00000027523
30	Upregulated	0.0511	1	94	40.4789	Dilated cardiomyopathy	http://www.genome.jp/kegg-bin/show_pathway?mmu05414	ENSMUSG00000027523
31	Upregulated	0.0518	1	149	25.6607	Phospholipase D signaling pathway	http://www.genome.jp/kegg-bin/show_pathway?mmu04072	ENSMUSG00000027523
32	Upregulated	0.0518	1	149	25.8919	Adrenergic signaling in cardiomyocytes	http://www.genome.jp/kegg-bin/show_pathway?mmu04261	ENSMUSG00000027523
33	Upregulated	0.0518	1	143	28.74	Vascular smooth muscle contraction	http://www.genome.jp/kegg-bin/show_pathway?mmu04270	ENSMUSG00000027523
34	Upregulated	0.0518	1	124	28.4554	Platelet activation	http://www.genome.jp/kegg-bin/show_pathway?mmu04611	ENSMUSG00000027523
35	Upregulated	0.0518	1	132	27.3714	Dopaminergic synapse	http://www.genome.jp/kegg-bin/show_pathway?mmu04728	ENSMUSG00000027523
36	Upregulated	0.0518	1	134	29.0303	Estrogen signaling pathway	http://www.genome.jp/kegg-bin/show_pathway?mmu04915	ENSMUSG00000027523
37	Upregulated	0.0518	1	129	26.367	Relaxin signaling pathway	http://www.genome.jp/kegg-bin/show_pathway?mmu04926	ENSMUSG00000027523
38	Upregulated	0.0518	1	117	28.74	Growth hormone synthesis secretion and action	http://www.genome.jp/kegg-bin/show_pathway?mmu04935	ENSMUSG00000027523
39	Upregulated	0.0549	1	152	23.5574	Oxytocin signaling pathway	http://www.genome.jp/kegg-bin/show_pathway?mmu04921	ENSMUSG00000027523
40	Upregulated	0.0565	1	162	21.9389	Cushing syndrome	http://www.genome.jp/kegg-bin/show_pathway?mmu04934	ENSMUSG00000027523
41	Upregulated	0.0565	1	199	21.7727	Alcoholism	http://www.genome.jp/kegg-bin/show_pathway?mmu05034	ENSMUSG00000027523
42	Upregulated	0.0601	1	209	19.9583	Chemical carcinogenesis-receptor activation	http://www.genome.jp/kegg-bin/show_pathway?mmu05207	ENSMUSG00000027523
43	Upregulated	0.0623	1	219	18.7843	CAMP signaling pathway	http://www.genome.jp/kegg-bin/show_pathway?mmu04024	ENSMUSG00000027523
44	Upregulated	0.0629	1	170	18.1899	Protein processing in endoplasmic reticulum	http://www.genome.jp/kegg-bin/show_pathway?mmu04141	ENSMUSG00000025823
45	Upregulated	0.0634	1	240	17.6319	Calcium signaling pathway	http://www.genome.jp/kegg-bin/show_pathway?mmu04020	ENSMUSG00000027523
46	Upregulated	0.0657	1	214	16.6127	Rap1 signaling pathway	http://www.genome.jp/kegg-bin/show_pathway?mmu04015	ENSMUSG00000027523
47	Upregulated	0.0702	1	248	15.2063	Human cytomegalovirus infection	http://www.genome.jp/kegg-bin/show_pathway?mmu05163	ENSMUSG00000027523
48	Upregulated	0.0748	1	228	13.9515	Thermogenesis	http://www.genome.jp/kegg-bin/show_pathway?mmu04714	ENSMUSG00000027523
49	Upregulated	0.0827	1	262	12.3348	Parkinson disease	http://www.genome.jp/kegg-bin/show_pathway?mmu05012	ENSMUSG00000027523

## Sheet: 3uM_BP 24h
	group	FDR	nGenes	Pathway size	Fold enriched	Pathway	URL	Genes
1	Upregulated	0.0772	3	444	17.173	Negative regulation of immune system process	http://amigo.geneontology.org/amigo/term/GO:0002683	ENSMUSG00000023010, ENSMUSG00000048546, ENSMUSG00000004951
2	Upregulated	0.0772	4	1157	8.09814	Negative regulation of molecular function	http://amigo.geneontology.org/amigo/term/GO:0044092	ENSMUSG00000023010, ENSMUSG00000004951, ENSMUSG00000027447, ENSMUSG00000075602
3	Upregulated	0.0772	1	2	895.857	Negative regulation of ribonuclease activity	http://amigo.geneontology.org/amigo/term/GO:0060701	ENSMUSG00000023010
4	Upregulated	0.0772	1	2	895.857	Negative regulation of endoribonuclease activity	http://amigo.geneontology.org/amigo/term/GO:0060702	ENSMUSG00000023010
5	Upregulated	0.0772	2	109	45.3599	Negative regulation of leukocyte differentiation	http://amigo.geneontology.org/amigo/term/GO:1902106	ENSMUSG00000048546, ENSMUSG00000004951
6	Upregulated	0.0772	2	113	43.1738	Negative regulation of hemopoiesis	http://amigo.geneontology.org/amigo/term/GO:1903707	ENSMUSG00000048546, ENSMUSG00000004951
7	Upregulated	0.0772	2	98	38.5315	Negative regulation of intrinsic apoptotic signaling pathway	http://amigo.geneontology.org/amigo/term/GO:2001243	ENSMUSG00000004951, ENSMUSG00000023010
8	Upregulated	0.0899	2	118	32.2831	Response to unfolded protein	http://amigo.geneontology.org/amigo/term/GO:0006986	ENSMUSG00000023010, ENSMUSG00000004951
9	Upregulated	0.0899	1	7	298.619	Negative regulation of nuclease activity	http://amigo.geneontology.org/amigo/term/GO:0032074	ENSMUSG00000023010
10	Upregulated	0.0899	1	5	358.343	CENP-A containing chromatin assembly	http://amigo.geneontology.org/amigo/term/GO:0034080	ENSMUSG00000072980
11	Upregulated	0.0899	2	141	27.1472	Response to topologically incorrect protein	http://amigo.geneontology.org/amigo/term/GO:0035966	ENSMUSG00000023010, ENSMUSG00000004951
12	Upregulated	0.0899	1	5	358.343	Positive regulation of endothelial cell chemotaxis by VEGF-activated vascular endothelial growth factor receptor signaling pathway	http://amigo.geneontology.org/amigo/term/GO:0038033	ENSMUSG00000004951
13	Upregulated	0.0899	3	779	9.18828	Negative regulation of catalytic activity	http://amigo.geneontology.org/amigo/term/GO:0043086	ENSMUSG00000023010, ENSMUSG00000004951, ENSMUSG00000027447
14	Upregulated	0.0899	1	6	447.929	Negative regulation of regulatory T cell differentiation	http://amigo.geneontology.org/amigo/term/GO:0045590	ENSMUSG00000004951
15	Upregulated	0.0899	1	3	597.238	Regulation of endoribonuclease activity	http://amigo.geneontology.org/amigo/term/GO:0060699	ENSMUSG00000023010
16	Upregulated	0.0899	1	5	358.343	CENP-A containing chromatin organization	http://amigo.geneontology.org/amigo/term/GO:0061641	ENSMUSG00000072980
17	Upregulated	0.0899	1	5	358.343	Negative regulation of transcription from RNA polymerase II promoter in response to endoplasmic reticulum stress	http://amigo.geneontology.org/amigo/term/GO:1990441	ENSMUSG00000023010
18	Upregulated	0.0899	2	173	22.2573	Regulation of intrinsic apoptotic signaling pathway	http://amigo.geneontology.org/amigo/term/GO:2001242	ENSMUSG00000004951, ENSMUSG00000023010
19	Upregulated	0.0938	1	8	223.964	Positive regulation of cell migration by vascular endothelial growth factor signaling pathway	http://amigo.geneontology.org/amigo/term/GO:0038089	ENSMUSG00000004951
20	Upregulated	0.0938	1	8	223.964	Anterograde axonal protein transport	http://amigo.geneontology.org/amigo/term/GO:0099641	ENSMUSG00000004951
21	Upregulated	0.0938	1	8	223.964	Regulation of hypoxia-induced intrinsic apoptotic signaling pathway	http://amigo.geneontology.org/amigo/term/GO:1903297	ENSMUSG00000023010
22	Upregulated	0.0938	1	8	223.964	Negative regulation of hypoxia-induced intrinsic apoptotic signaling pathway	http://amigo.geneontology.org/amigo/term/GO:1903298	ENSMUSG00000023010
23	Upregulated	0.0938	1	8	223.964	Protein localization to presynapse	http://amigo.geneontology.org/amigo/term/GO:1905383	ENSMUSG00000004951
24	Upregulated	0.0945	1	14	179.171	Negative regulation of immunoglobulin production	http://amigo.geneontology.org/amigo/term/GO:0002638	ENSMUSG00000023010
25	Upregulated	0.0945	1	10	179.171	Chromatin remodeling at centromere	http://amigo.geneontology.org/amigo/term/GO:0031055	ENSMUSG00000072980
26	Upregulated	0.0945	2	301	14.931	Regulation of angiogenesis	http://amigo.geneontology.org/amigo/term/GO:0045765	ENSMUSG00000023885, ENSMUSG00000004951
27	Upregulated	0.0945	3	1044	7.10059	Negative regulation of developmental process	http://amigo.geneontology.org/amigo/term/GO:0051093	ENSMUSG00000023885, ENSMUSG00000048546, ENSMUSG00000004951
28	Upregulated	0.0945	1	15	162.883	Regulation of ribonuclease activity	http://amigo.geneontology.org/amigo/term/GO:0060700	ENSMUSG00000023010
29	Upregulated	0.0945	1	12	149.31	Negative regulation of transcription from RNA polymerase II promoter in response to stress	http://amigo.geneontology.org/amigo/term/GO:0097201	ENSMUSG00000023010
30	Upregulated	0.0945	1	14	149.31	Protein transport along microtubule	http://amigo.geneontology.org/amigo/term/GO:0098840	ENSMUSG00000004951
31	Upregulated	0.0945	1	14	149.31	Microtubule-based protein transport	http://amigo.geneontology.org/amigo/term/GO:0099118	ENSMUSG00000004951
32	Upregulated	0.0945	1	10	179.171	Axo-dendritic protein transport	http://amigo.geneontology.org/amigo/term/GO:0099640	ENSMUSG00000004951
33	Upregulated	0.0945	2	305	14.6862	Regulation of vasculature development	http://amigo.geneontology.org/amigo/term/GO:1901342	ENSMUSG00000023885, ENSMUSG00000004951
34	Upregulated	0.0945	1	14	149.31	Response to L-glutamate	http://amigo.geneontology.org/amigo/term/GO:1902065	ENSMUSG00000023010
35	Upregulated	0.0945	2	323	15.12	Regulation of leukocyte differentiation	http://amigo.geneontology.org/amigo/term/GO:1902105	ENSMUSG00000048546, ENSMUSG00000004951
36	Upregulated	0.0945	1	11	162.883	Intrinsic apoptotic signaling pathway in response to hypoxia	http://amigo.geneontology.org/amigo/term/GO:1990144	ENSMUSG00000023010
37	Upregulated	0.0945	1	15	137.824	Positive regulation of endothelial cell chemotaxis	http://amigo.geneontology.org/amigo/term/GO:2001028	ENSMUSG00000004951
38	Upregulated	0.0945	2	236	16.8236	Negative regulation of apoptotic signaling pathway	http://amigo.geneontology.org/amigo/term/GO:2001234	ENSMUSG00000023010, ENSMUSG00000004951
39	Upregulated	0.0967	1	14	127.98	Negative regulation of cellular response to hypoxia	http://amigo.geneontology.org/amigo/term/GO:1900038	ENSMUSG00000023010
40	Upregulated	0.0992	3	1096	6.4373	Negative regulation of multicellular organismal process	http://amigo.geneontology.org/amigo/term/GO:0051241	ENSMUSG00000023885, ENSMUSG00000048546, ENSMUSG00000004951
41	Upregulated	0.0992	1	16	119.448	Negative regulation of oxidative stress-induced intrinsic apoptotic signaling pathway	http://amigo.geneontology.org/amigo/term/GO:1902176	ENSMUSG00000004951
42	Downregulated	0.0448	1	20	209.033	TRNA wobble base modification	http://amigo.geneontology.org/amigo/term/GO:0002097	ENSMUSG00000054836
43	Downregulated	0.0448	1	17	245.922	TRNA wobble uridine modification	http://amigo.geneontology.org/amigo/term/GO:0002098	ENSMUSG00000054836
44	Downregulated	0.0448	1	11	418.067	Hypotonic response	http://amigo.geneontology.org/amigo/term/GO:0006971	ENSMUSG00000022836
45	Downregulated	0.0448	1	14	348.389	Tonic smooth muscle contraction	http://amigo.geneontology.org/amigo/term/GO:0014820	ENSMUSG00000022836
46	Downregulated	0.0448	2	558	17.3472	Positive regulation of cell migration	http://amigo.geneontology.org/amigo/term/GO:0030335	ENSMUSG00000022836, ENSMUSG00000054836
47	Downregulated	0.0448	1	12	380.061	Bleb assembly	http://amigo.geneontology.org/amigo/term/GO:0032060	ENSMUSG00000022836
48	Downregulated	0.0448	1	18	298.619	Response to potassium ion	http://amigo.geneontology.org/amigo/term/GO:0035864	ENSMUSG00000022836
49	Downregulated	0.0448	1	13	380.061	Cellular response to potassium ion	http://amigo.geneontology.org/amigo/term/GO:0035865	ENSMUSG00000022836
50	Downregulated	0.0448	2	602	16.5244	Positive regulation of locomotion	http://amigo.geneontology.org/amigo/term/GO:0040017	ENSMUSG00000022836, ENSMUSG00000054836
51	Downregulated	0.0448	2	598	16.6229	Positive regulation of cellular component movement	http://amigo.geneontology.org/amigo/term/GO:0051272	ENSMUSG00000022836, ENSMUSG00000054836
52	Downregulated	0.0448	1	4	1045.17	Aorta smooth muscle tissue morphogenesis	http://amigo.geneontology.org/amigo/term/GO:0060414	ENSMUSG00000022836
53	Downregulated	0.0448	1	9	522.583	Cellular hypotonic response	http://amigo.geneontology.org/amigo/term/GO:0071476	ENSMUSG00000022836
54	Downregulated	0.0448	2	584	16.9258	Positive regulation of cell motility	http://amigo.geneontology.org/amigo/term/GO:2000147	ENSMUSG00000022836, ENSMUSG00000054836
55	Downregulated	0.0541	1	28	160.795	Smooth muscle tissue development	http://amigo.geneontology.org/amigo/term/GO:0048745	ENSMUSG00000022836
56	Downregulated	0.0544	1	31	149.31	Aorta morphogenesis	http://amigo.geneontology.org/amigo/term/GO:0035909	ENSMUSG00000022836
57	Downregulated	0.0726	2	956	10.4647	Regulation of cell migration	http://amigo.geneontology.org/amigo/term/GO:0030334	ENSMUSG00000022836, ENSMUSG00000054836
58	Downregulated	0.0726	1	61	77.4198	Aorta development	http://amigo.geneontology.org/amigo/term/GO:0035904	ENSMUSG00000022836
59	Downregulated	0.0726	2	1062	9.66628	Regulation of locomotion	http://amigo.geneontology.org/amigo/term/GO:0040012	ENSMUSG00000022836, ENSMUSG00000054836
60	Downregulated	0.0726	1	73	64.3179	Artery morphogenesis	http://amigo.geneontology.org/amigo/term/GO:0048844	ENSMUSG00000022836
61	Downregulated	0.0726	2	1090	9.40532	Regulation of cellular component movement	http://amigo.geneontology.org/amigo/term/GO:0051270	ENSMUSG00000022836, ENSMUSG00000054836
62	Downregulated	0.0726	1	80	64.3179	Muscle tissue morphogenesis	http://amigo.geneontology.org/amigo/term/GO:0060415	ENSMUSG00000022836
63	Downregulated	0.0726	1	86	68.5355	Cellular response to calcium ion	http://amigo.geneontology.org/amigo/term/GO:0071277	ENSMUSG00000022836
64	Downregulated	0.0726	1	50	95.0152	Cellular response to osmotic stress	http://amigo.geneontology.org/amigo/term/GO:0071470	ENSMUSG00000022836
65	Downregulated	0.0726	1	59	97.2248	Positive regulation of wound healing	http://amigo.geneontology.org/amigo/term/GO:0090303	ENSMUSG00000022836
66	Downregulated	0.0726	1	76	73.345	Positive regulation of response to wounding	http://amigo.geneontology.org/amigo/term/GO:1903036	ENSMUSG00000022836
67	Downregulated	0.0726	2	1014	10.0136	Regulation of cell motility	http://amigo.geneontology.org/amigo/term/GO:2000145	ENSMUSG00000022836, ENSMUSG00000054836
68	Downregulated	0.0742	1	88	60.5894	Muscle organ morphogenesis	http://amigo.geneontology.org/amigo/term/GO:0048644	ENSMUSG00000022836
69	Downregulated	0.081	1	113	51.6132	Smooth muscle contraction	http://amigo.geneontology.org/amigo/term/GO:0006939	ENSMUSG00000022836
70	Downregulated	0.081	1	101	52.2583	Response to osmotic stress	http://amigo.geneontology.org/amigo/term/GO:0006970	ENSMUSG00000022836
71	Downregulated	0.0831	1	88	48.6124	TRNA modification	http://amigo.geneontology.org/amigo/term/GO:0006400	ENSMUSG00000054836
72	Downregulated	0.0841	1	104	46.4519	Artery development	http://amigo.geneontology.org/amigo/term/GO:0060840	ENSMUSG00000022836
73	Downregulated	0.0869	1	147	42.229	Positive regulation of calcium ion transport	http://amigo.geneontology.org/amigo/term/GO:0051928	ENSMUSG00000022836
74	Downregulated	0.0869	1	129	43.5486	Regulation of wound healing	http://amigo.geneontology.org/amigo/term/GO:0061041	ENSMUSG00000022836
75	Downregulated	0.0916	2	1533	6.85917	Cell migration	http://amigo.geneontology.org/amigo/term/GO:0016477	ENSMUSG00000022836, ENSMUSG00000054836
76	Downregulated	0.0916	1	153	36.6725	Response to calcium ion	http://amigo.geneontology.org/amigo/term/GO:0051592	ENSMUSG00000022836
77	Downregulated	0.0916	1	200	37.3274	Cellular response to xenobiotic stimulus	http://amigo.geneontology.org/amigo/term/GO:0071466	ENSMUSG00000022836
78	Downregulated	0.0934	1	127	34.2678	TRNA processing	http://amigo.geneontology.org/amigo/term/GO:0008033	ENSMUSG00000054836
79	Downregulated	0.0934	1	128	33.1799	Mitochondrial translation	http://amigo.geneontology.org/amigo/term/GO:0032543	ENSMUSG00000039680
80	Downregulated	0.0934	2	1724	6.28199	Cell motility	http://amigo.geneontology.org/amigo/term/GO:0048870	ENSMUSG00000022836, ENSMUSG00000054836
81	Downregulated	0.0934	2	1724	6.28199	Localization of cell	http://amigo.geneontology.org/amigo/term/GO:0051674	ENSMUSG00000022836, ENSMUSG00000054836
82	Downregulated	0.0934	1	166	32.6615	Regulation of response to wounding	http://amigo.geneontology.org/amigo/term/GO:1903034	ENSMUSG00000022836

## Sheet: 3uM_KEEG 24h
	group	FDR	nGenes	Pathway size	Fold enriched	Pathway	URL	Genes
1	Upregulated	0.0988	1	82	19.4189	RNA degradation	http://www.genome.jp/kegg-bin/show_pathway?mmu03018	ENSMUSG00000048546
2	Upregulated	0.0988	1	58	28.1765	VEGF signaling pathway	http://www.genome.jp/kegg-bin/show_pathway?mmu04370	ENSMUSG00000004951
3	Upregulated	0.0988	1	88	19.9583	ECM-receptor interaction	http://www.genome.jp/kegg-bin/show_pathway?mmu04512	ENSMUSG00000023885
4	Upregulated	0.0988	1	84	26.1273	Salivary secretion	http://www.genome.jp/kegg-bin/show_pathway?mmu04970	ENSMUSG00000027447
5	Upregulated	0.0988	1	55	44.9062	Malaria	http://www.genome.jp/kegg-bin/show_pathway?mmu05144	ENSMUSG00000023885
6	Upregulated	0.0988	1	107	18.1899	Amoebiasis	http://www.genome.jp/kegg-bin/show_pathway?mmu05146	ENSMUSG00000004951
7	Downregulated	0.0637	1	130	22.6299	Ribosome	http://www.genome.jp/kegg-bin/show_pathway?mmu03010	ENSMUSG00000039680
8	Downregulated	0.0637	1	240	17.6319	Calcium signaling pathway	http://www.genome.jp/kegg-bin/show_pathway?mmu04020	ENSMUSG00000022836
9	Downregulated	0.0637	1	171	22.1077	CGMP-PKG signaling pathway	http://www.genome.jp/kegg-bin/show_pathway?mmu04022	ENSMUSG00000022836
10	Downregulated	0.0637	1	143	28.74	Vascular smooth muscle contraction	http://www.genome.jp/kegg-bin/show_pathway?mmu04270	ENSMUSG00000022836
11	Downregulated	0.0637	1	136	24.7759	Apelin signaling pathway	http://www.genome.jp/kegg-bin/show_pathway?mmu04371	ENSMUSG00000022836
12	Downregulated	0.0637	1	200	15.4516	Focal adhesion	http://www.genome.jp/kegg-bin/show_pathway?mmu04510	ENSMUSG00000022836
13	Downregulated	0.0637	1	124	28.4554	Platelet activation	http://www.genome.jp/kegg-bin/show_pathway?mmu04611	ENSMUSG00000022836
14	Downregulated	0.0637	1	219	15.4516	Regulation of actin cytoskeleton	http://www.genome.jp/kegg-bin/show_pathway?mmu04810	ENSMUSG00000022836
15	Downregulated	0.0637	1	152	23.5574	Oxytocin signaling pathway	http://www.genome.jp/kegg-bin/show_pathway?mmu04921	ENSMUSG00000022836
16	Downregulated	0.0637	1	75	56.3529	Gastric acid secretion	http://www.genome.jp/kegg-bin/show_pathway?mmu04971	ENSMUSG00000022836

## Sheet: BP_24h
CBD concentration	No of processes	BP
CBD_0.325 CBD_1.5 CBD_3	7	Regulation of cell migration
		Localization of cell
		Cell motility
		Regulation of cell motility
		Regulation of cellular component movement
		Cell migration
		Regulation of locomotion
CBD_0.325 CBD_1.5	14	Acute-phase response
		Movement of cell or subcellular component
		Monocyte chemotaxis
		Negative regulation of leukocyte migration
		Locomotion
		Negative regulation of amine transport
		Negative regulation of anion transport
		Regulation of amino acid transport
		Regulation of amine transport
		Negative regulation of amino acid transport
		Negative regulation of organic acid transport
		Amine transport
		Regulation of monocyte chemotaxis
		Gastrulation
CBD_1.5 CBD_3	1	Regulation of leukocyte differentiation
CBD_0.325	79	NADH dehydrogenase complex assembly
		Ameboidal-type cell migration
		Purine ribonucleoside triphosphate metabolic process
		Mitochondrial respiratory chain complex I assembly
		Regulation of serotonin biosynthetic process
		Purine-containing compound biosynthetic process
		Purine ribonucleoside triphosphate biosynthetic process
		Acetaldehyde metabolic process
		Behavioral response to ethanol
		Dopamine biosynthetic process
		Serotonin metabolic process
		Respiratory electron transport chain
		Proton transmembrane transport
		Tissue development
		Energy coupled proton transmembrane transport against electrochemical gradient
		Proton motive force-driven mitochondrial ATP synthesis
		Endothelial cell fate commitment
		Purine ribonucleotide biosynthetic process
		Indole-containing compound biosynthetic process
		ATP biosynthetic process
		Mitochondrial ATP synthesis coupled electron transport
		Negative regulation of dopamine receptor signaling pathway
		Ethanol catabolic process
		Proton motive force-driven ATP synthesis
		Serotonin biosynthetic process
		Purine nucleoside triphosphate metabolic process
		Positive regulation of iron ion transmembrane transport
		Regulation of calcium ion transport
		Mitochondrial respiratory chain complex assembly
		Negative regulation of leukocyte tethering or rolling
		Pancreatic juice secretion
		Electron transport chain
		Electron transport coupled proton transport
		Ribonucleotide biosynthetic process
		Lymphatic endothelial cell differentiation
		Cellular detoxification of aldehyde
		Negative regulation of cytolysis
		Positive regulation of iron ion import across plasma membrane
		Nucleoside triphosphate metabolic process
		Mitochondrial electron transport NADH to ubiquinone
		Circulatory system development
		Nucleoside triphosphate biosynthetic process
		Anatomical structure morphogenesis
		Ribose phosphate biosynthetic process
		Ribonucleoside triphosphate metabolic process
		Regulation of localization
		Sequestering of iron ion
		Interneuron migration
		Primary amino compound biosynthetic process
		ATP synthesis coupled electron transport
		Regulation of metal ion transport
		Primary alcohol catabolic process
		Aerobic respiration
		Multicellular organism development
		Ribonucleoside triphosphate biosynthetic process
		Secretion by tissue
		Regulation of ion transport
		Positive regulation of iron ion transport
		Response to ethanol
		Negative regulation of glycine import across plasma membrane
		Ethanol metabolic process
		Osteoblast proliferation
		Positive chemotaxis
		Regulation of iron ion import across plasma membrane
		Taxis
		Oxidative phosphorylation
		Cellular response to cytokine stimulus
		Intracellular receptor signaling pathway
		Regulation of dopamine biosynthetic process
		Purine nucleoside triphosphate biosynthetic process
		Regulation of chemotaxis
		System process
		Lymphatic endothelial cell fate commitment
		Temperature homeostasis
		Aerobic electron transport chain
		Epithelial cell fate commitment
		Chemotaxis
		Purine nucleotide biosynthetic process
		Memory
CBD_0.75	1	Regulation of body fluid levels
CBD_1.5	57	Response to prostaglandin E
		Positive regulation of cAMP-mediated signaling
		Positive regulation of sodium ion transport
		Regulation of cyclase activity
		CAMP-mediated signaling
		Regulation of hemopoiesis
		Regulation of endocrine process
		Cell activation
		Negative regulation of blood pressure
		Regulation of MAP kinase activity
		Embryonic hindlimb morphogenesis
		Cell-cell signaling by wnt
		Regulation of T cell differentiation in thymus
		Excretion
		Hemopoiesis
		Cell-cell adhesion
		Negative regulation of T cell differentiation
		Ectodermal placode formation
		Cellular response to prostaglandin stimulus
		Parathyroid hormone secretion
		Establishment of mitochondrion localization
		Endochondral ossification
		Positive regulation of JUN kinase activity
		Ectodermal placode morphogenesis
		Cellular response to prostaglandin E stimulus
		Regulation of renal sodium excretion
		Renal sodium excretion
		Leukocyte differentiation
		Post-embryonic animal morphogenesis
		Hematopoietic or lymphoid organ development
		Adenylate cyclase-activating dopamine receptor signaling pathway
		Regulation of cAMP-mediated signaling
		Response to parathyroid hormone
		Positive regulation of osteoclast differentiation
		Wnt signaling pathway
		Adenylate cyclase-activating adrenergic receptor signaling pathway
		Dopamine receptor signaling pathway
		Positive regulation of myeloid leukocyte differentiation
		Negative regulation of renal sodium excretion
		Hair follicle placode formation
		Mitochondrion localization
		Regulation of renal system process
		Adrenergic receptor signaling pathway
		Regulation of parathyroid hormone secretion
		Negative regulation of lymphocyte differentiation
		Replacement ossification
		Hindlimb morphogenesis
		Ectodermal placode development
		Regulation of excretion
		Cell-cell signaling
		Sodium ion homeostasis
		Genomic imprinting
		Renal tubular secretion
		Negative regulation of multicellular organism growth
		Response to prostaglandin
		Cell surface receptor signaling pathway involved in cell-cell signaling
		Negative regulation of T cell differentiation in thymus
CBD_3	74	TRNA wobble base modification
		Axo-dendritic protein transport
		Bleb assembly
		Regulation of endoribonuclease activity
		Artery development
		Negative regulation of apoptotic signaling pathway
		Positive regulation of wound healing
		Response to topologically incorrect protein
		TRNA modification
		Positive regulation of cellular component movement
		Muscle organ morphogenesis
		Regulation of ribonuclease activity
		Regulation of angiogenesis
		Negative regulation of transcription from RNA polymerase II promoter in response to endoplasmic reticulum stress
		Regulation of intrinsic apoptotic signaling pathway
		Negative regulation of molecular function
		Negative regulation of multicellular organismal process
		Regulation of wound healing
		Aorta development
		Protein localization to presynapse
		Muscle tissue morphogenesis
		Regulation of response to wounding
		CENP-A containing chromatin assembly
		Positive regulation of endothelial cell chemotaxis by VEGF-activated vascular endothelial growth factor receptor signaling pathway
		Negative regulation of ribonuclease activity
		Negative regulation of developmental process
		Negative regulation of oxidative stress-induced intrinsic apoptotic signaling pathway
		TRNA processing
		CENP-A containing chromatin organization
		Hypotonic response
		TRNA wobble uridine modification
		Protein transport along microtubule
		Response to calcium ion
		Microtubule-based protein transport
		Intrinsic apoptotic signaling pathway in response to hypoxia
		Cellular response to potassium ion
		Response to osmotic stress
		Chromatin remodeling at centromere
		Negative regulation of hemopoiesis
		Cellular response to osmotic stress
		Cellular response to calcium ion
		Response to potassium ion
		Negative regulation of immunoglobulin production
		Negative regulation of catalytic activity
		Positive regulation of cell motility
		Regulation of vasculature development
		Response to L-glutamate
		Positive regulation of cell migration
		Negative regulation of leukocyte differentiation
		Aorta smooth muscle tissue morphogenesis
		Positive regulation of calcium ion transport
		Negative regulation of immune system process
		Mitochondrial translation
		Cellular hypotonic response
		Cellular response to xenobiotic stimulus
		Regulation of hypoxia-induced intrinsic apoptotic signaling pathway
		Anterograde axonal protein transport
		Positive regulation of locomotion
		Tonic smooth muscle contraction
		Aorta morphogenesis
		Negative regulation of intrinsic apoptotic signaling pathway
		Smooth muscle contraction
		Negative regulation of transcription from RNA polymerase II promoter in response to stress
		Smooth muscle tissue development
		Negative regulation of cellular response to hypoxia
		Positive regulation of endothelial cell chemotaxis
		Negative regulation of regulatory T cell differentiation
		Negative regulation of endoribonuclease activity
		Positive regulation of cell migration by vascular endothelial growth factor signaling pathway
		Negative regulation of hypoxia-induced intrinsic apoptotic signaling pathway
		Artery morphogenesis
		Positive regulation of response to wounding
		Response to unfolded protein
		Negative regulation of nuclease activity

## Sheet: KEEG_24h
CBD concentration	No of pathways	KEEG
CBD_0.325 CBD_1.5	2	Parkinson disease
		Thermogenesis
CBD_0.75 CBD_3	1	RNA degradation
CBD_1.5 CBD_3	7	Vascular smooth muscle contraction
		Gastric acid secretion
		Platelet activation
		Oxytocin signaling pathway
		Salivary secretion
		Amoebiasis
		Calcium signaling pathway
CBD_0.325	24	Longevity regulating pathway-multiple species
		Prion disease
		Pantothenate and CoA biosynthesis
		Pyruvate metabolism
		Alzheimer disease
		Fatty acid degradation
		Glycolysis/Gluconeogenesis
		Glycerolipid metabolism
		Huntington disease
		Lysine degradation
		Histidine metabolism
		Tryptophan metabolism
		Diabetic cardiomyopathy
		Metabolic pathways
		Beta-Alanine metabolism
		Arginine and proline metabolism
		Oxidative phosphorylation
		Valine leucine and isoleucine degradation
		Retrograde endocannabinoid signaling
		Pathways of neurodegeneration-multiple diseases
		Chemical carcinogenesis-reactive oxygen species
		Alcoholic liver disease
		Ascorbate and aldarate metabolism
		Amyotrophic lateral sclerosis
CBD_1.5	40	Vasopressin-regulated water reabsorption
		Cortisol synthesis and secretion
		Thyroid hormone synthesis
		Parathyroid hormone synthesis secretion and action
		Growth hormone synthesis secretion and action
		Amphetamine addiction
		Alcoholism
		Phospholipase D signaling pathway
		CAMP signaling pathway
		Renin secretion
		Insulin secretion
		Endocrine and other factor-regulated calcium reabsorption
		Circadian entrainment
		Chagas disease
		Glutamatergic synapse
		Rap1 signaling pathway
		Serotonergic synapse
		Dopaminergic synapse
		Pancreatic secretion
		Long-term depression
		Dilated cardiomyopathy
		Relaxin signaling pathway
		Regulation of lipolysis in adipocytes
		Bile secretion
		Endocrine resistance
		Melanogenesis
		Aldosterone synthesis and secretion
		Human cytomegalovirus infection
		Cushing syndrome
		Protein processing in endoplasmic reticulum
		Gap junction
		Glucagon signaling pathway
		Adrenergic signaling in cardiomyocytes
		Chemical carcinogenesis-receptor activation
		GnRH signaling pathway
		Cocaine addiction
		Inflammatory mediator regulation of TRP channels
		Morphine addiction
		Estrogen signaling pathway
		Ovarian steroidogenesis
CBD_3	8	Apelin signaling pathway
		Focal adhesion
		Ribosome
		ECM-receptor interaction
		Regulation of actin cytoskeleton
		CGMP-PKG signaling pathway
		Malaria
		VEGF signaling pathway
